# Supplementary material for: Metal-free annulation of β-acylamino ketones: facile access to spirooxazolines and oxazolines via oxidative C–O bond formation
Source: Royal Society of Chemistry journal article supplement (doi:10.1039/c7qo00783c), 2017-10-16

RK-8 #172 RT: 0.76 AV: 1 NL: 7.61E9  
T: FTMS + p ESI Full ms [100.00-1500.00]

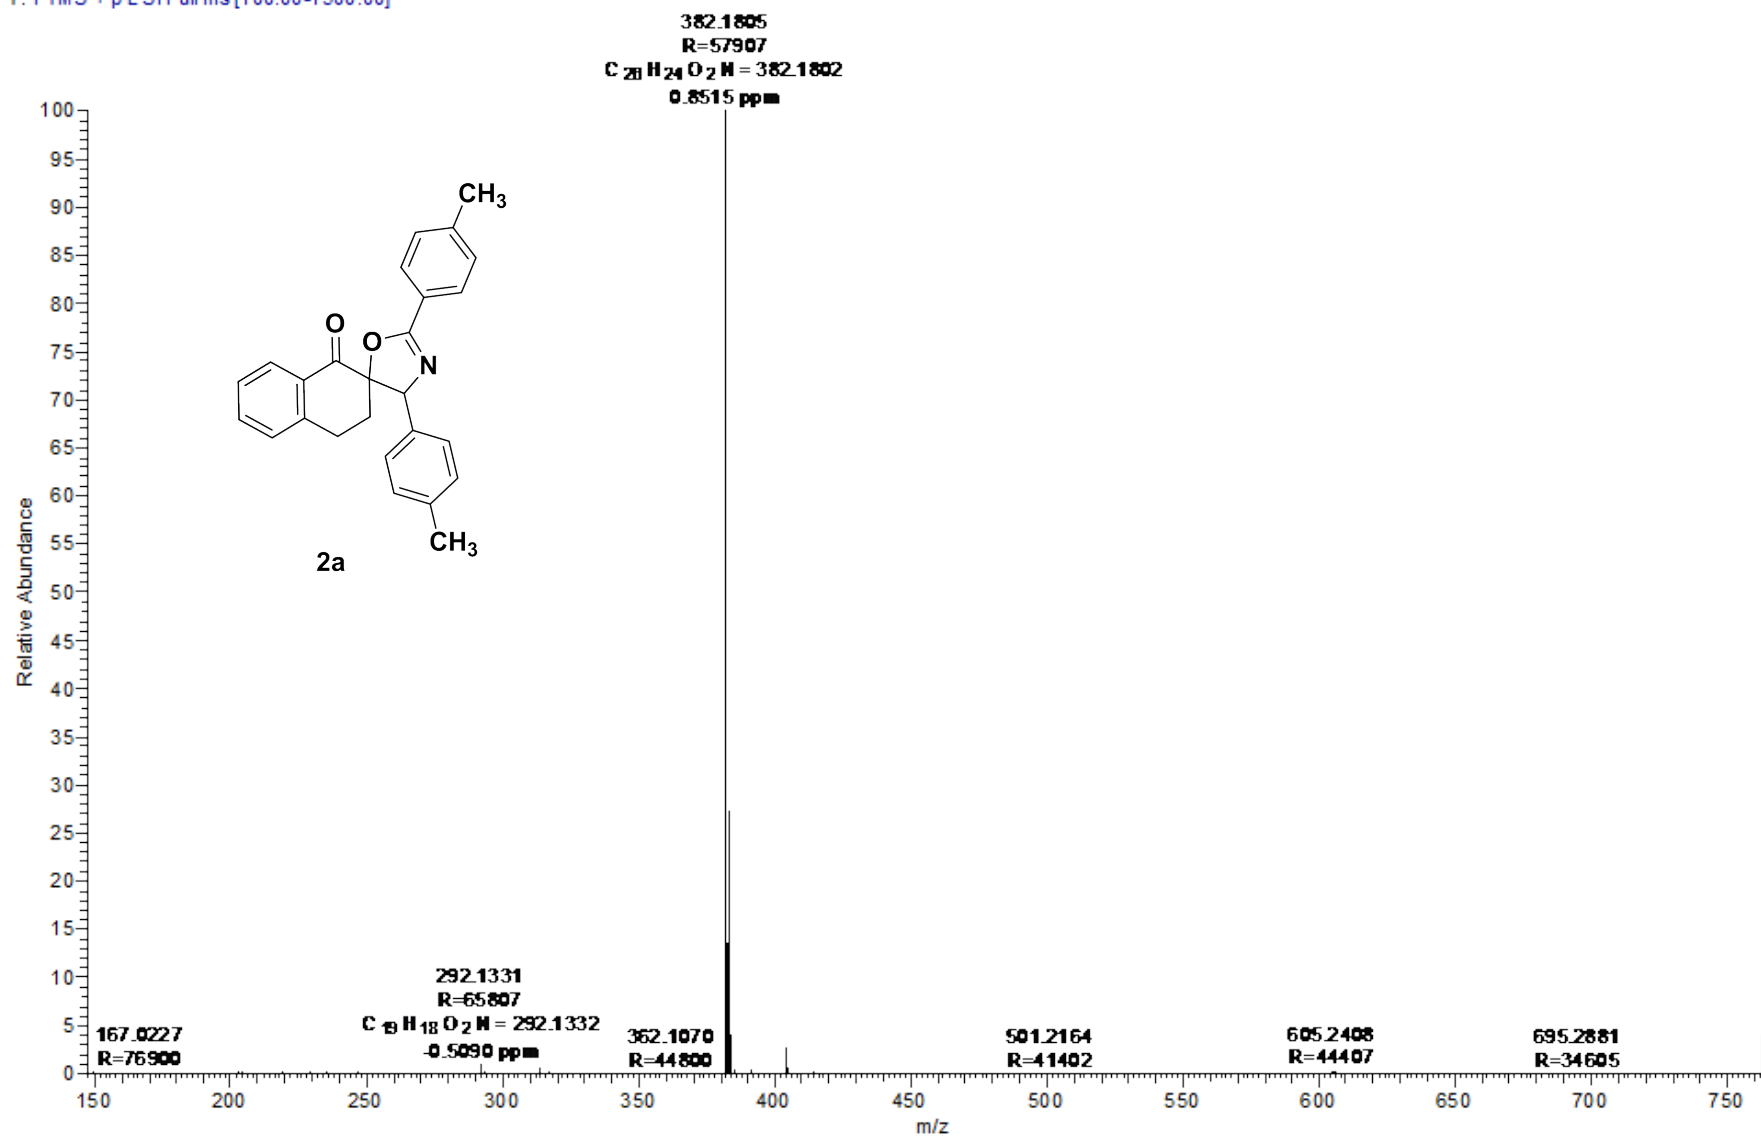

rk-12\_170228162123 #161 RT: 0.71 AV: 1 NL: 4.49E9  
T: FTMS + p ESI Full ms [100.00-1500.00]

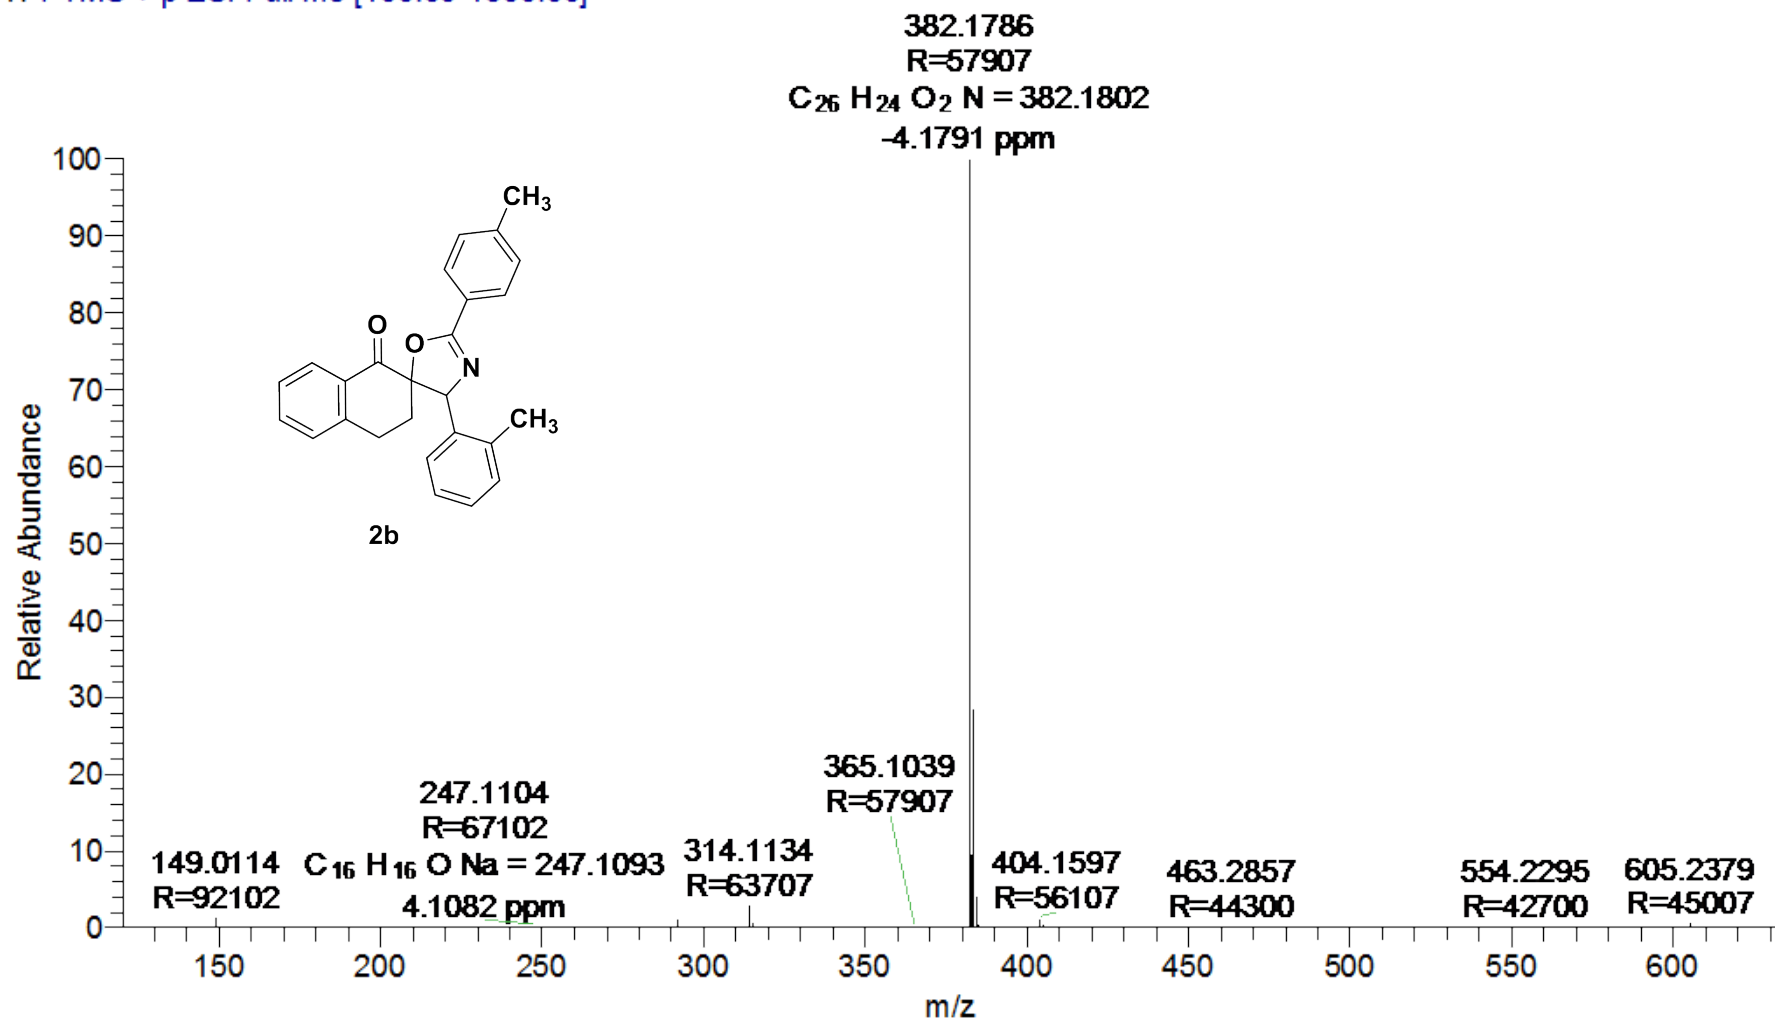

rk-11\_170228161813 #149 RT: 0.66 AV: 1 NL: 6.60E9  
T: FTMS + p ESI Full ms [100.00-1500.00]

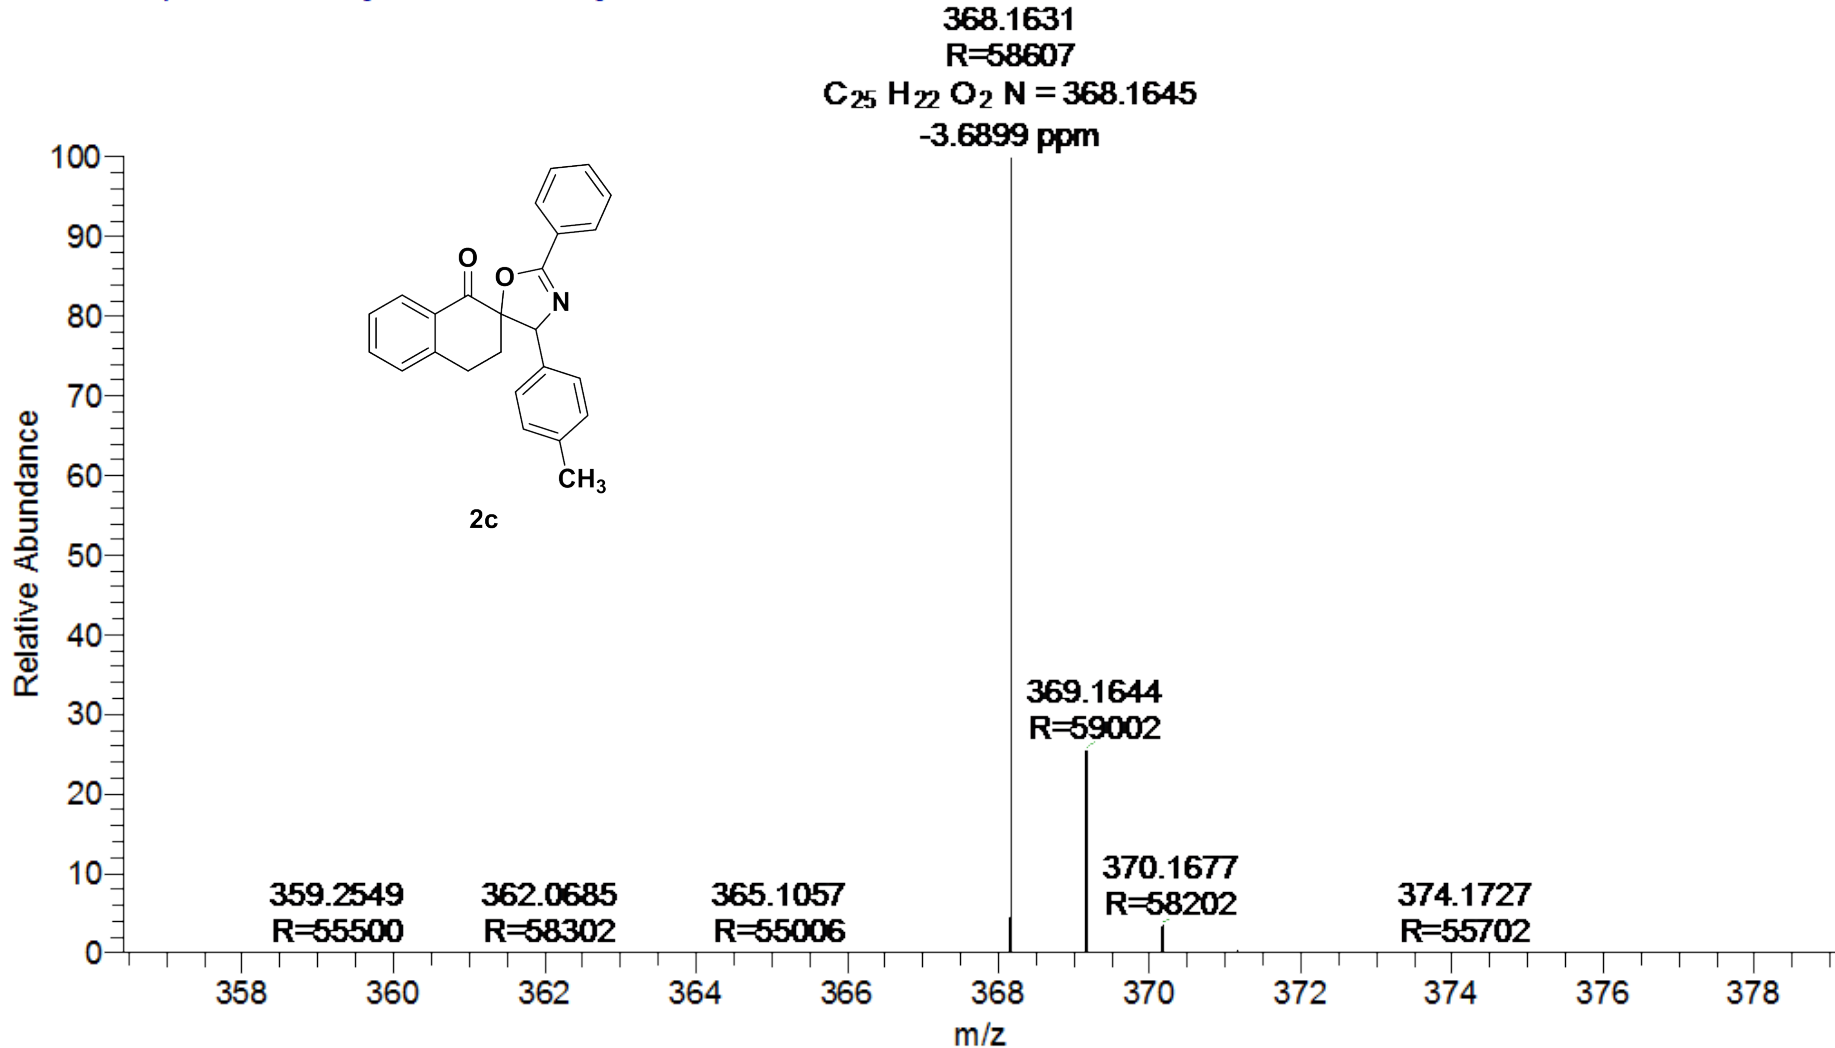

RK-7 #170 RT: 0.75 AV: 1 NL: 1.47E10  
T: FTMS + p ESI Full ms [100.00-1500.00]

348.1961  
R=60403  
C<sub>23</sub>H<sub>20</sub>O<sub>2</sub>N = 348.1958  
0.9503 ppm

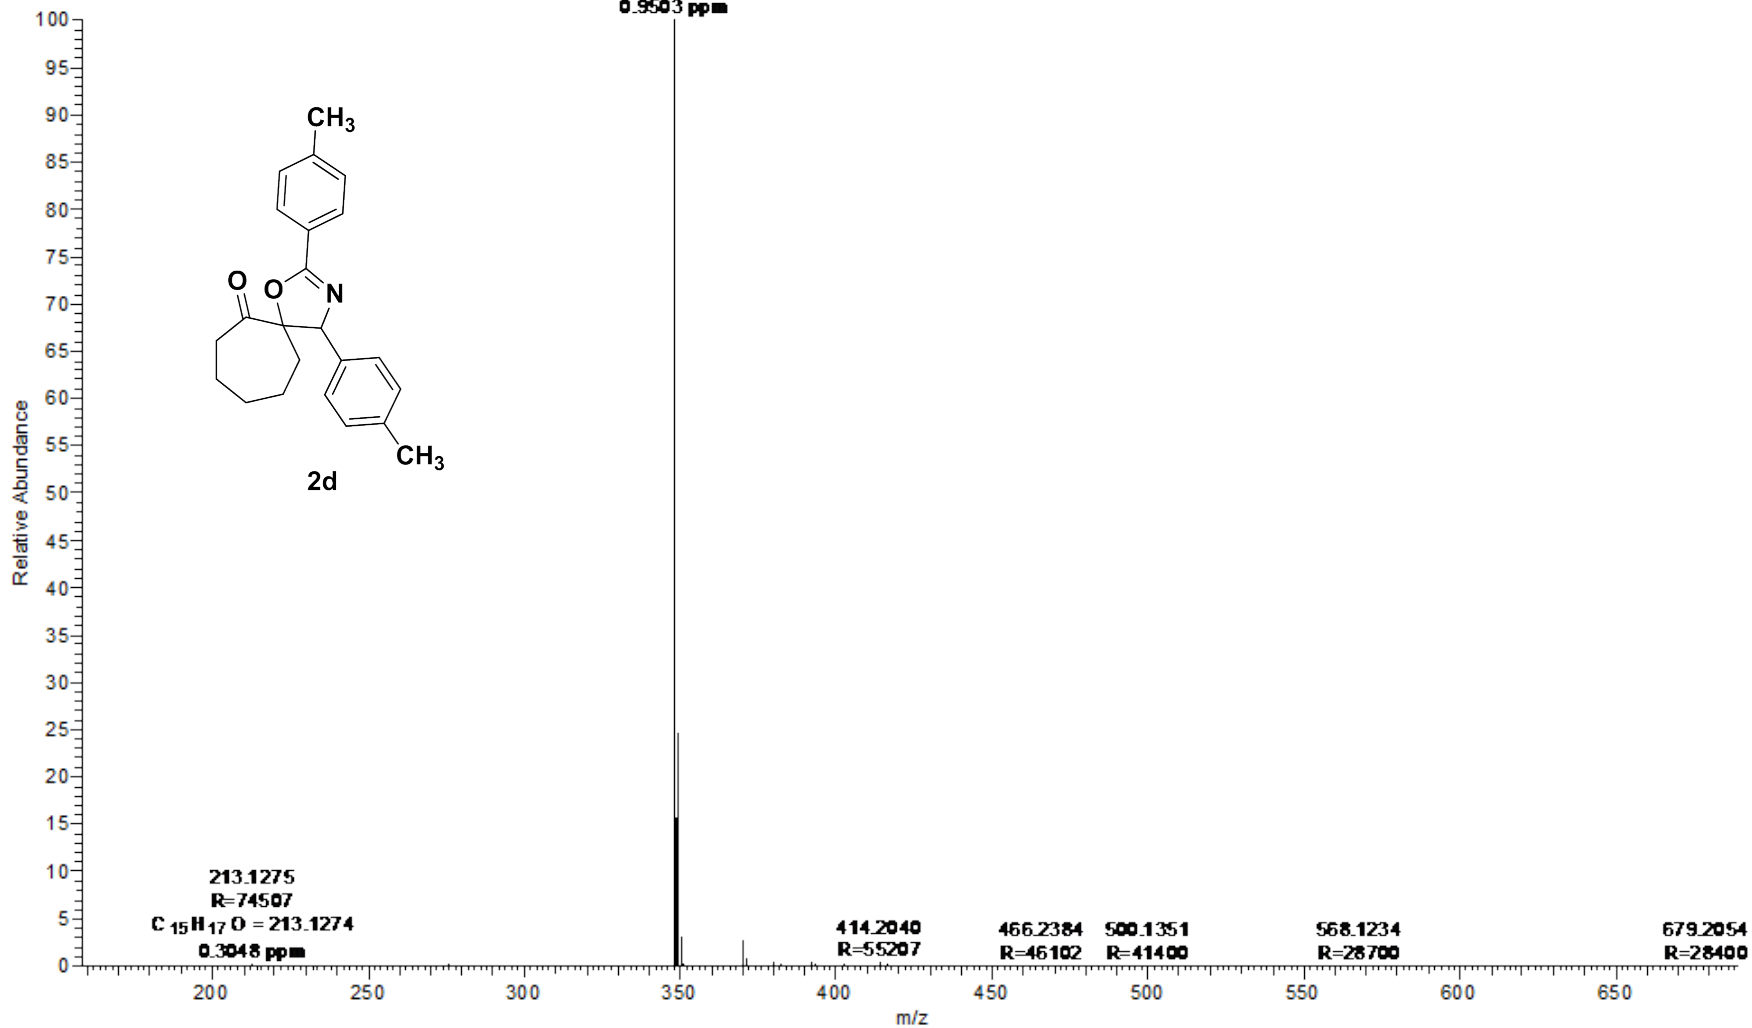

RK-21 #148 RT: 0.66 AV: 1 NL: 8.45E6  
T: FTMS + p ESI Full ms [100.00-1500.00]

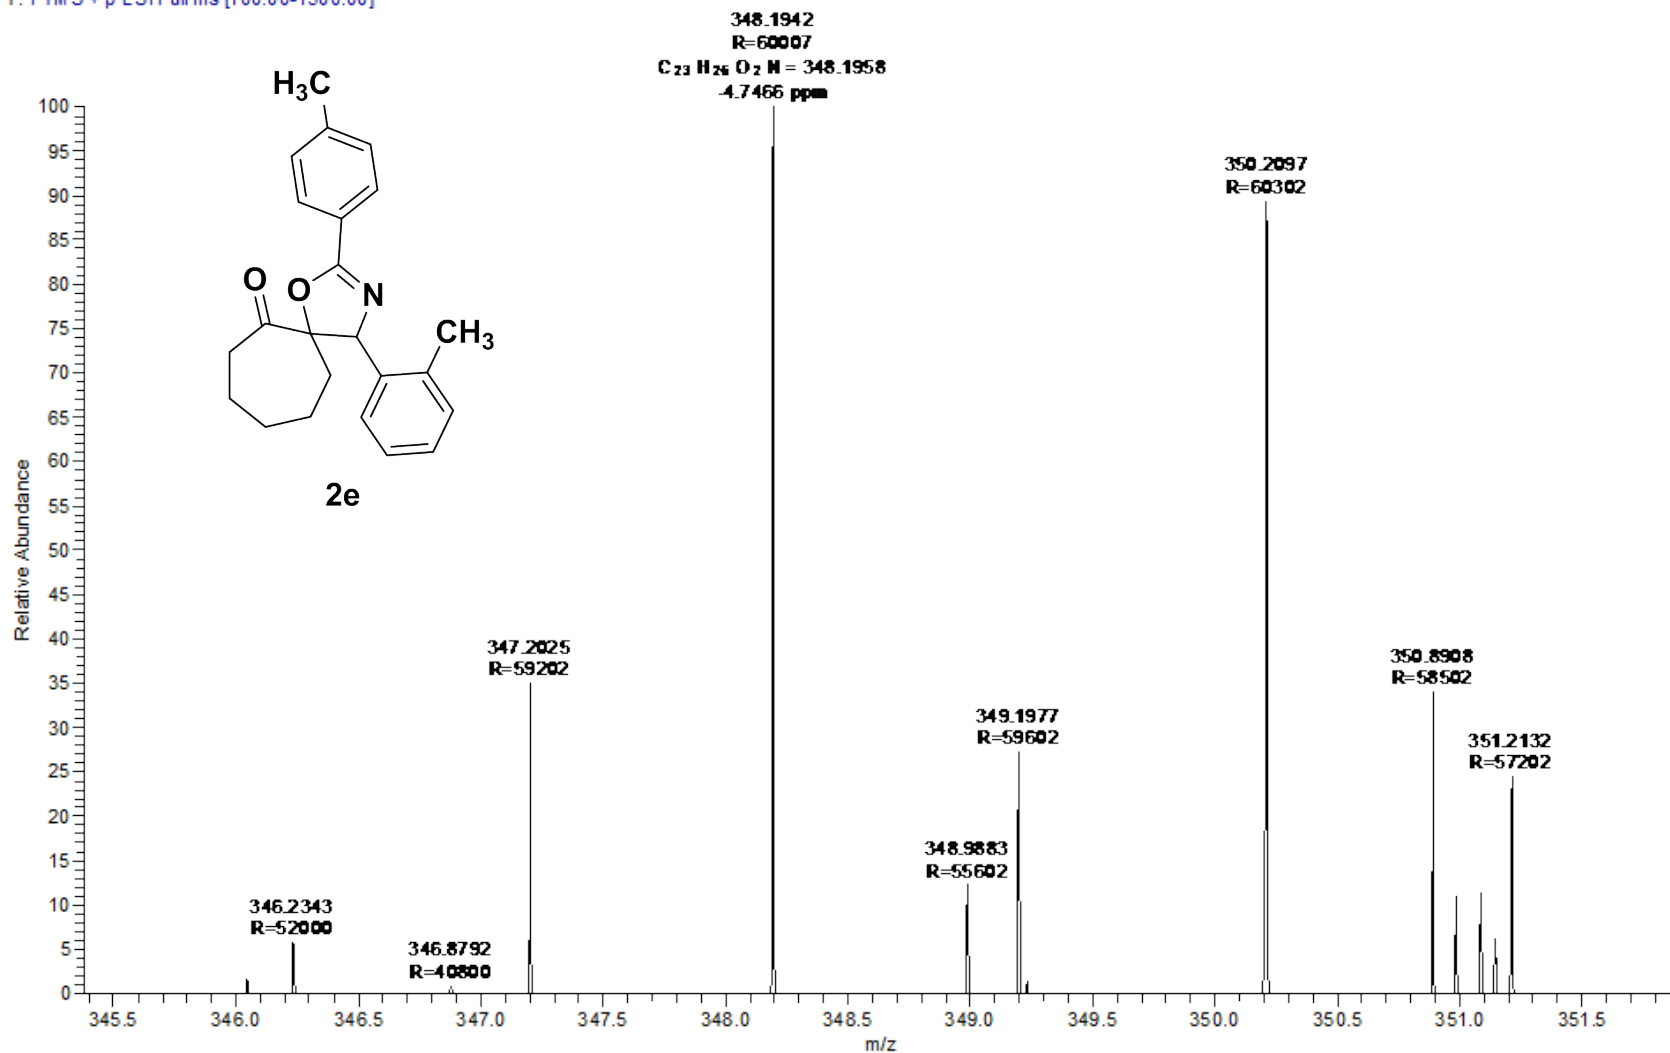

Rk-22 #131 RT: 0.58 AV: 1 NL: 2.37E9  
T: FTM S + p ESI Full ms [100.00-1500.00]

394.2017  
R=55807  
C<sub>24</sub>H<sub>28</sub>O<sub>4</sub>N = 394.2013  
1.0295 ppm

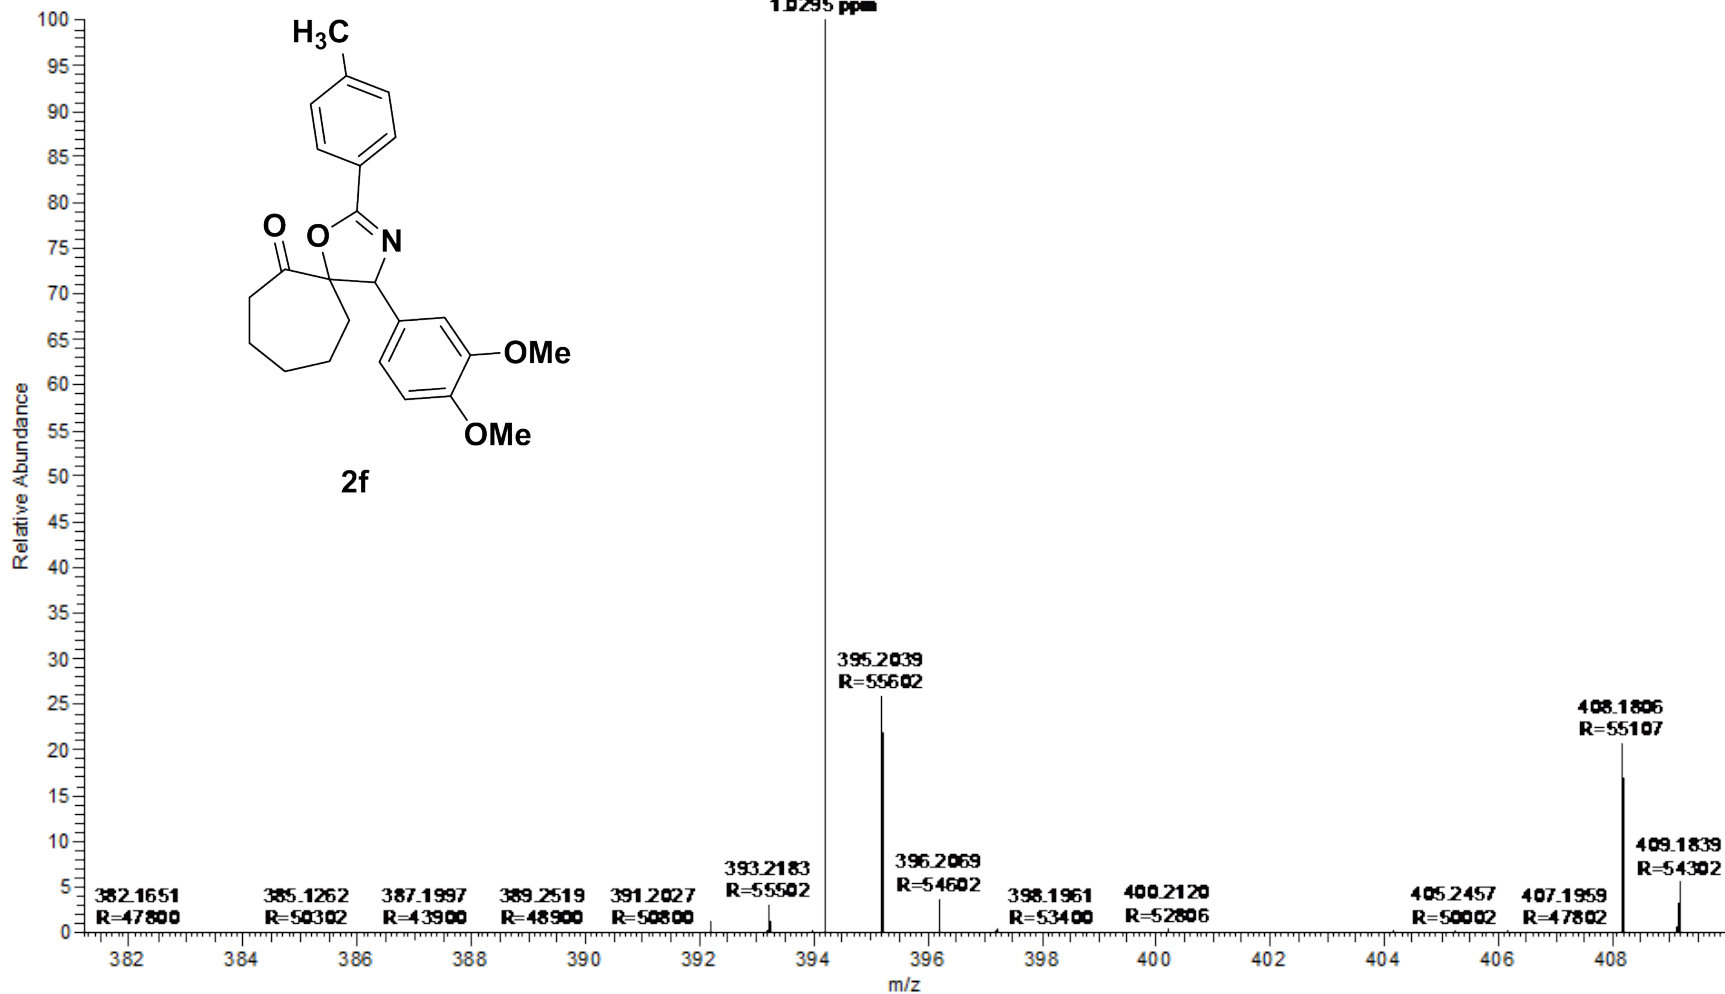

RK-23 #171 RT: 0.76 AV: 1 NL: 2.65E9  
T: FTMS + p ESI Full ms [100.00-1500.00]

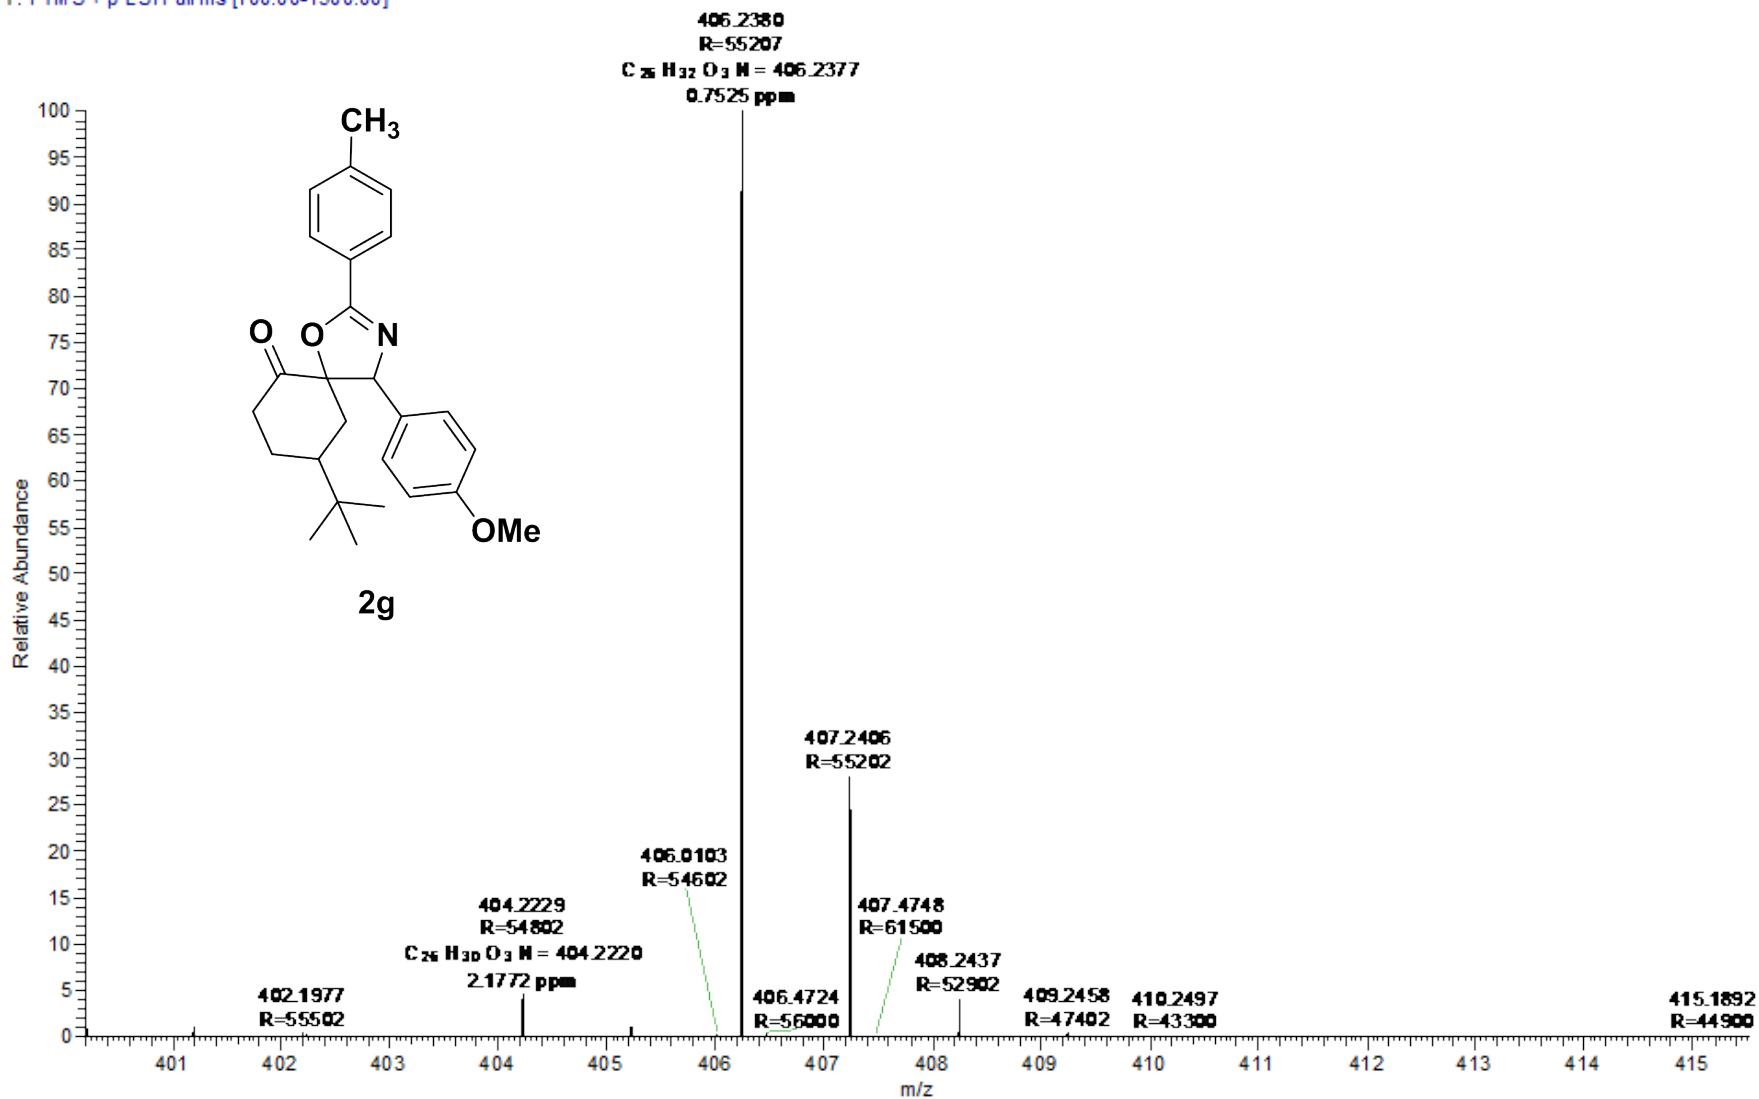

MS Spectrum

MSD1 SPC, time=1.389.1.771 of D:\DATA\OCT-2017\RK-1.D MM-ES+APCI, Pos. Scan, Frag: 70

100

Max: 49891

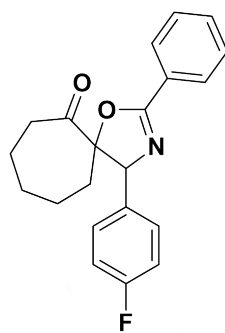

2h

80

60

40

20

0

338.1

339.1

250

275

300

325

350

375

400

425

m/z



118-1\_160621111618 #147 RT: 0.65 AV: 1 NL: 2.33E9  
T: FTMS + p ESI Full ms [100.00-1500.00]

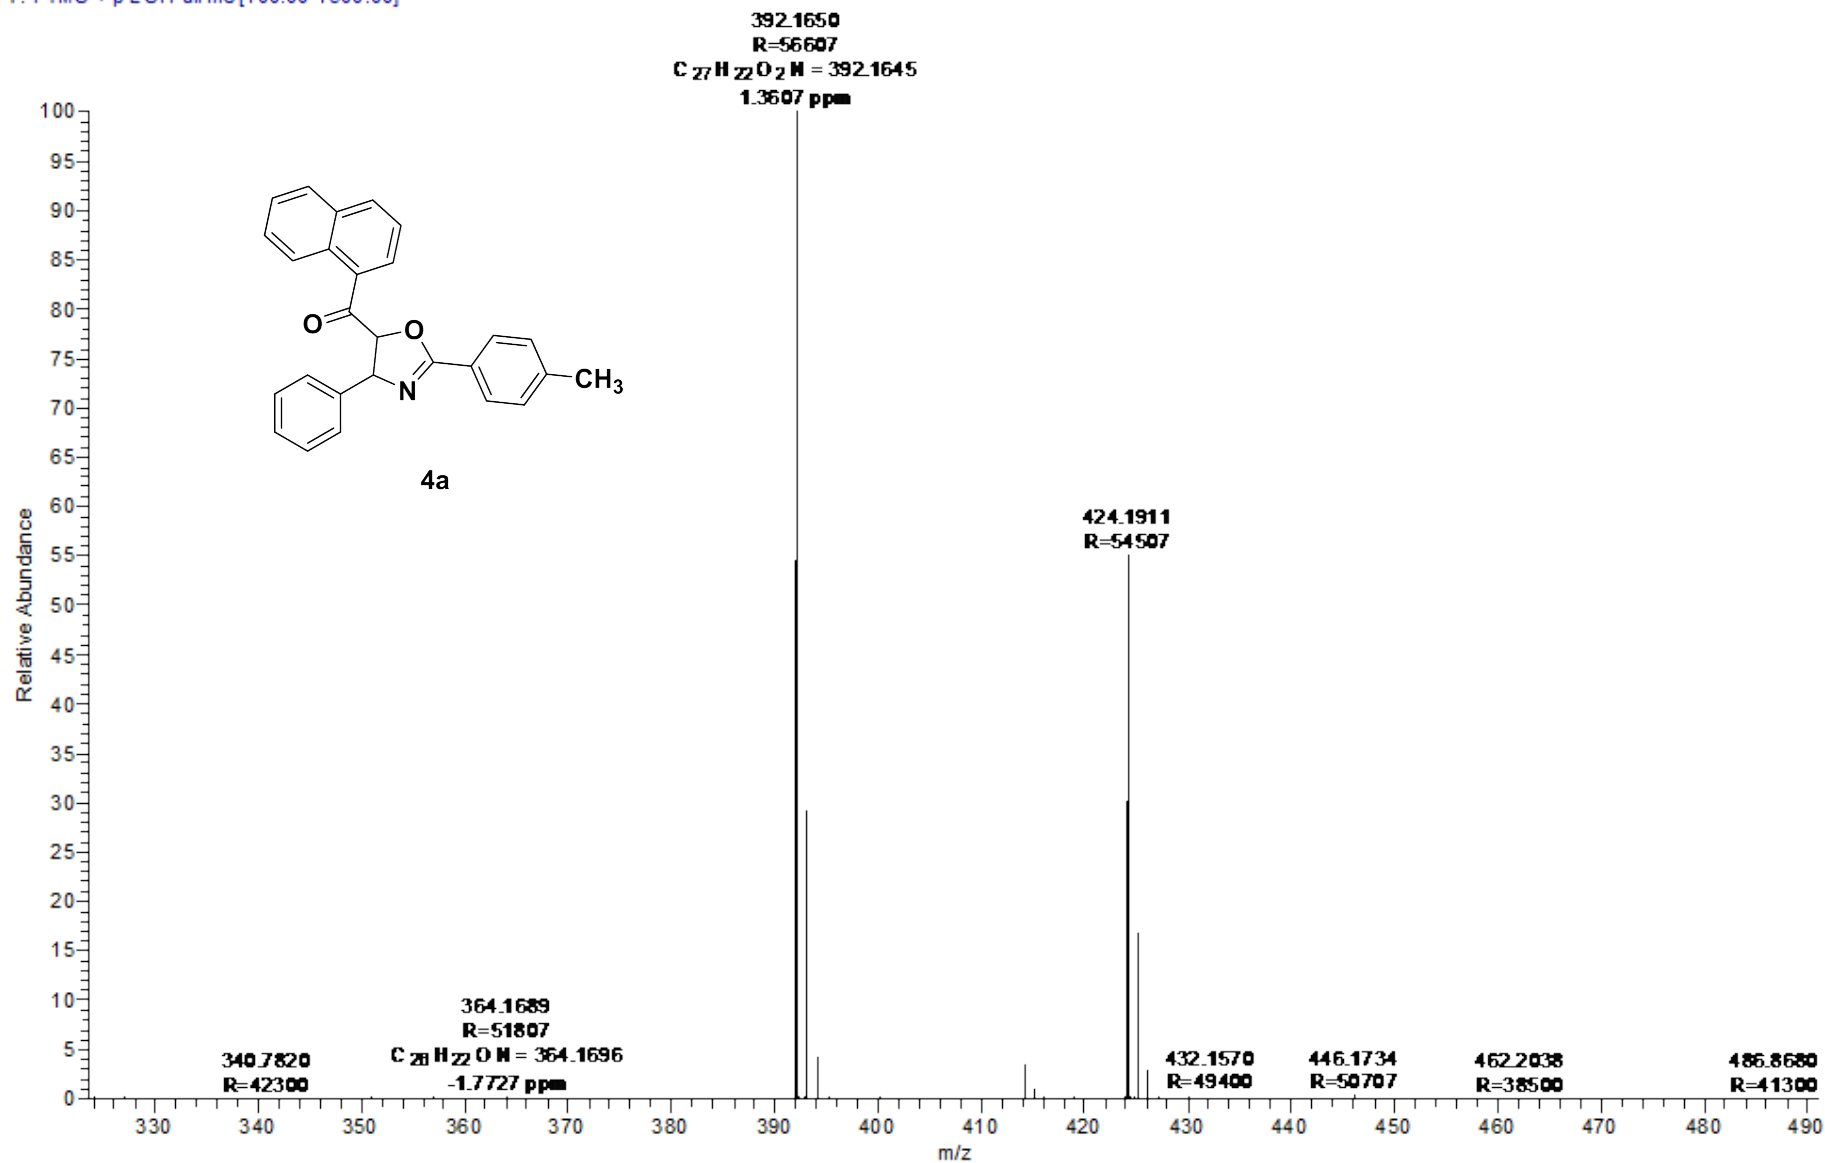

SP-119#142 RT: 0.63 AV: 1 NL: 1.92E7  
: FTM S + p ESI Full ms [100.00-1500.00]

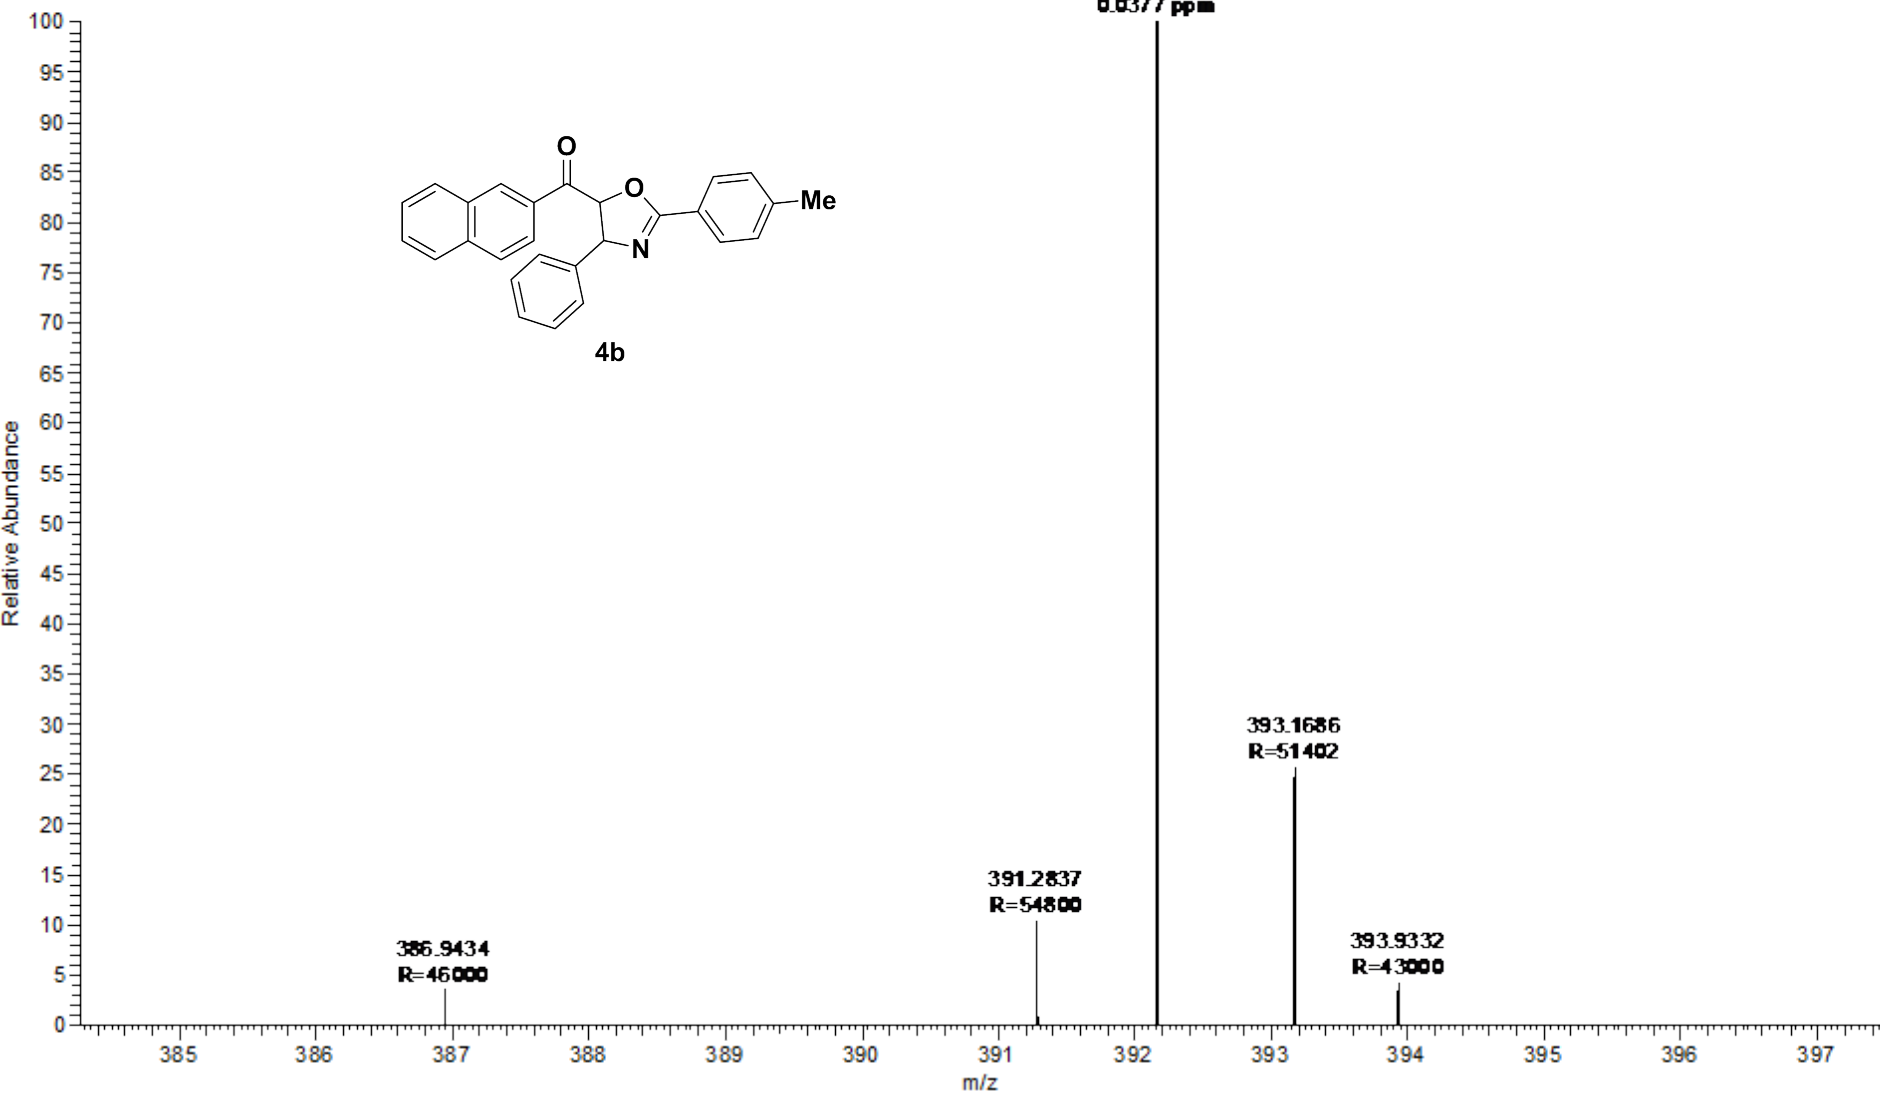

AZ-7 #148 RT: 0.66 AV: 1 NL: 2.05E6  
T: FTMS + p ESI Full ms [100.00-1500.00]

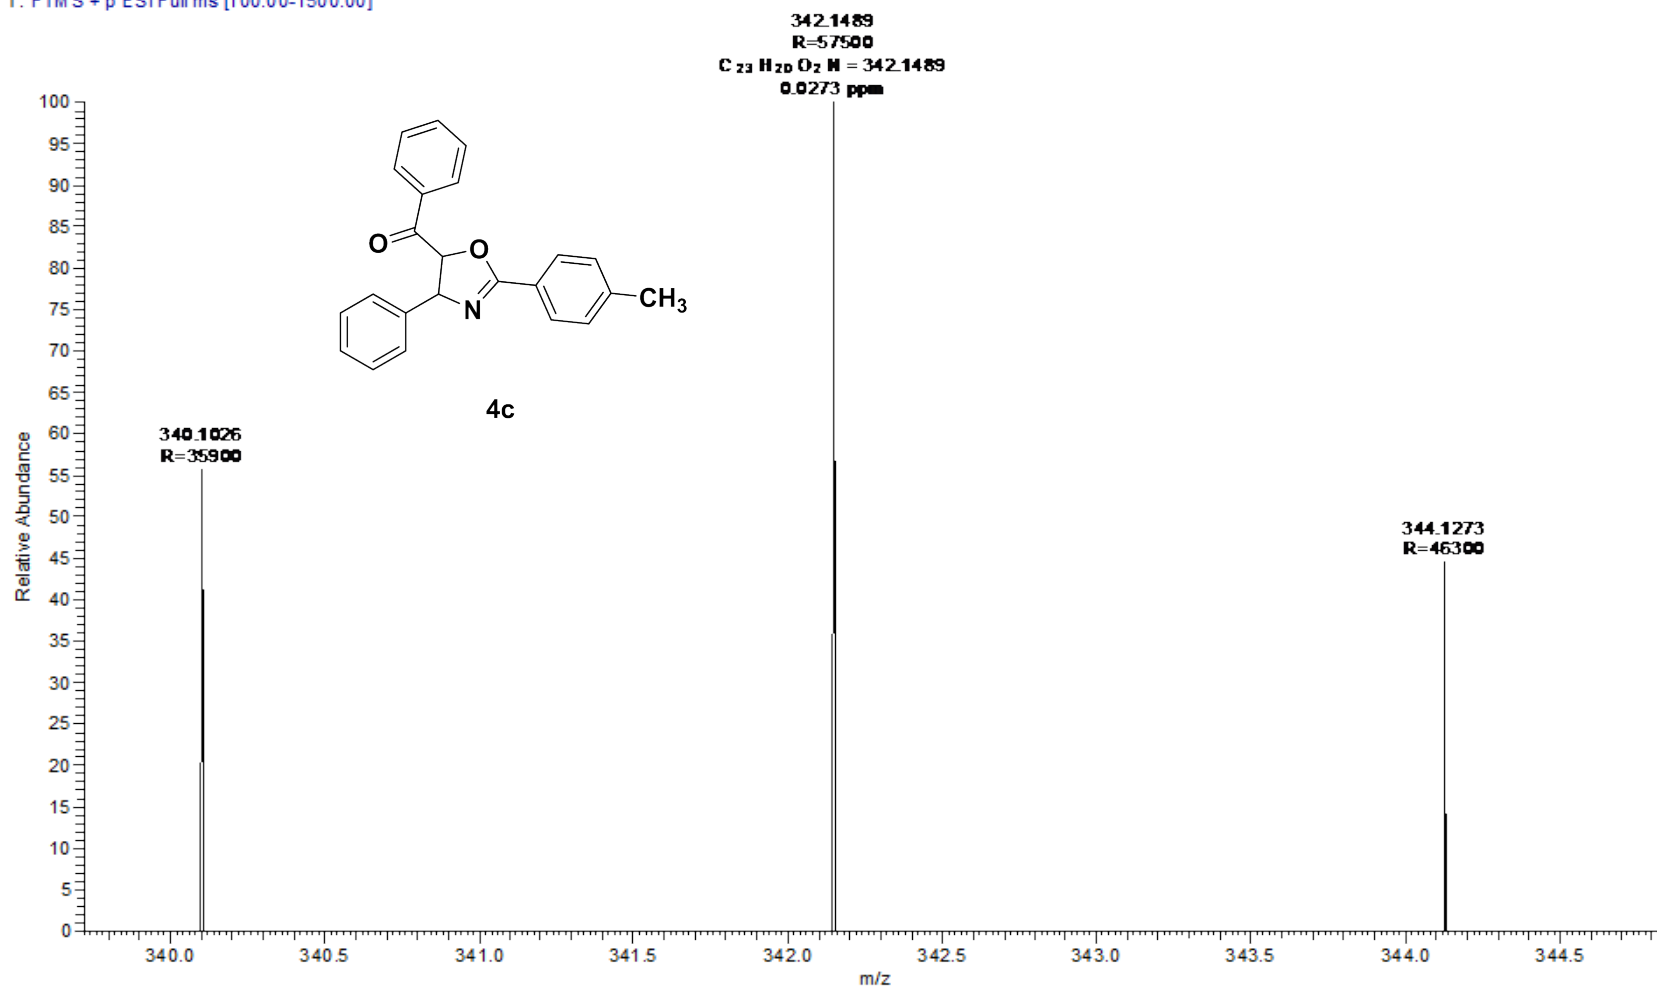

BP-149 #152 RT: 0.67 AV: 1 NL: 6.12E9  
T: FTMS + p ESI Full ms [100.00-1500.00]

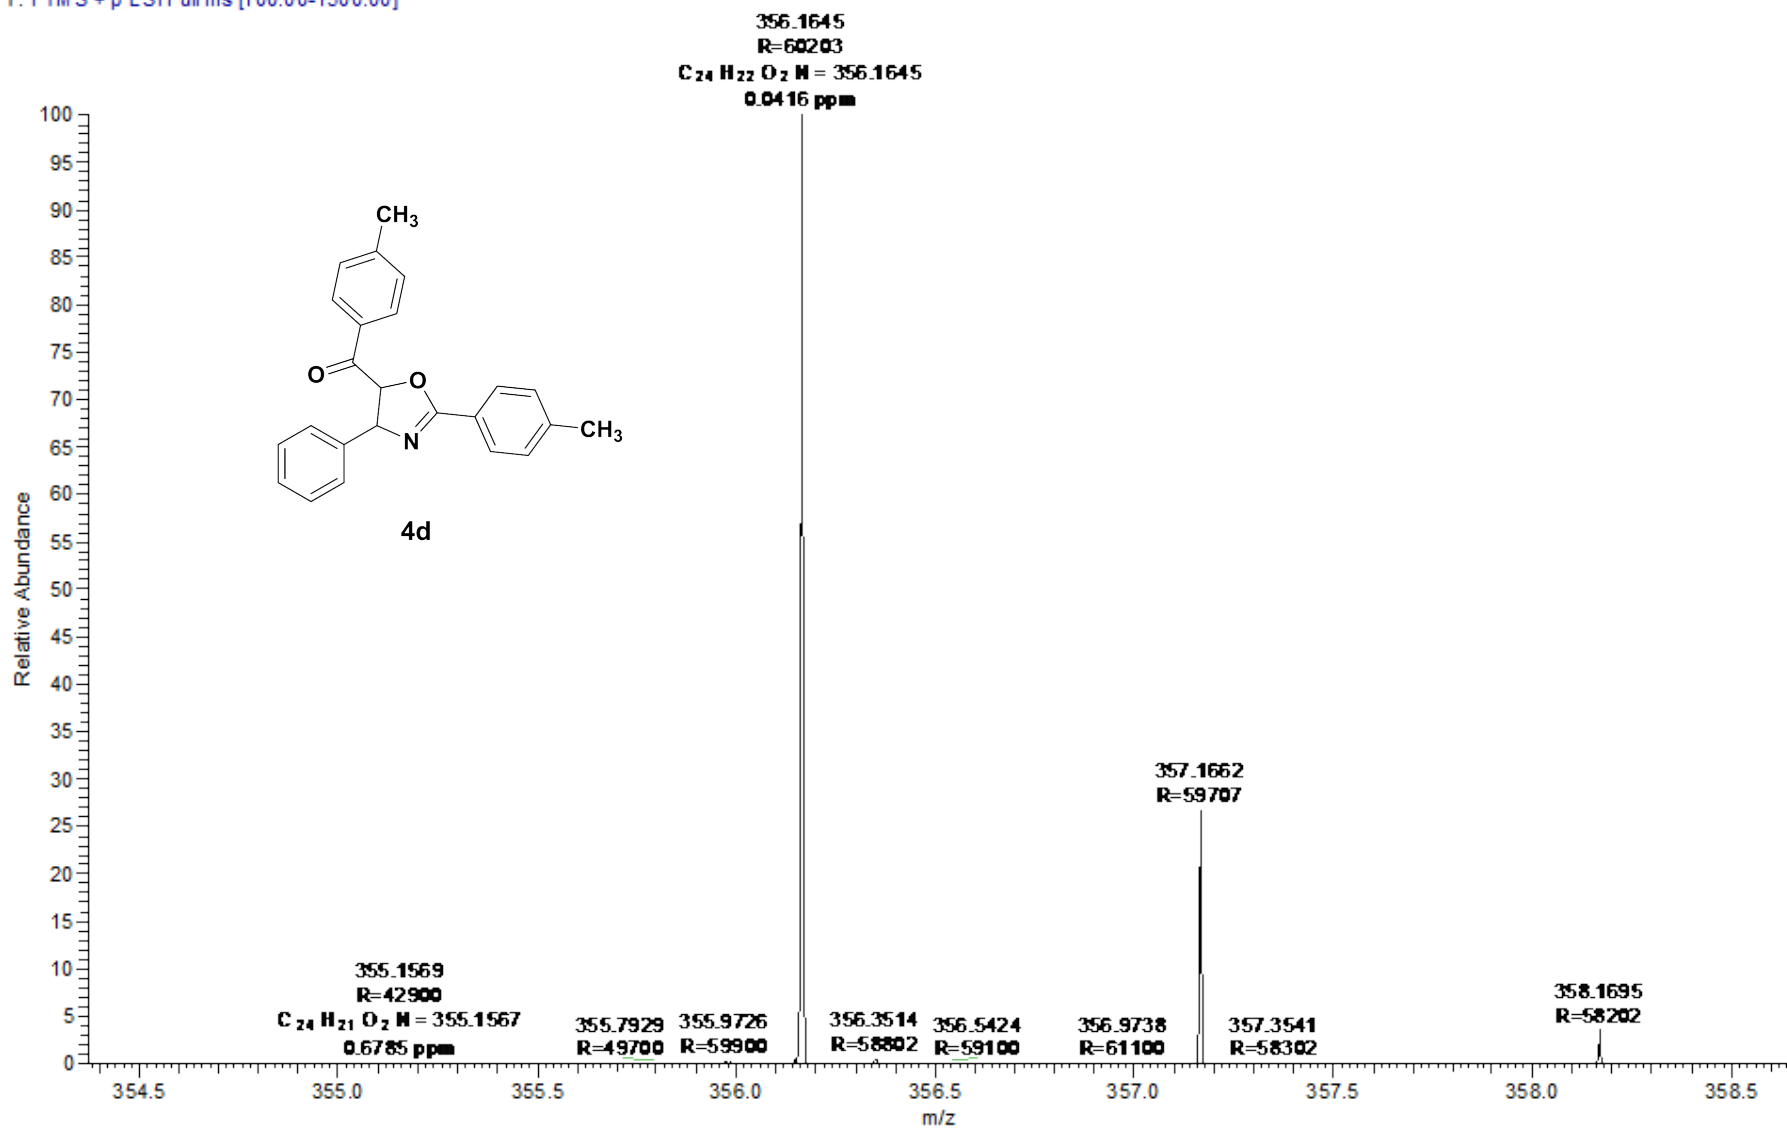

BP-122-I#112 RT: 0.50 AV: 1 NL: 5.73E6  
T: FTMS + p ESI Full ms [100.00-1500.00]

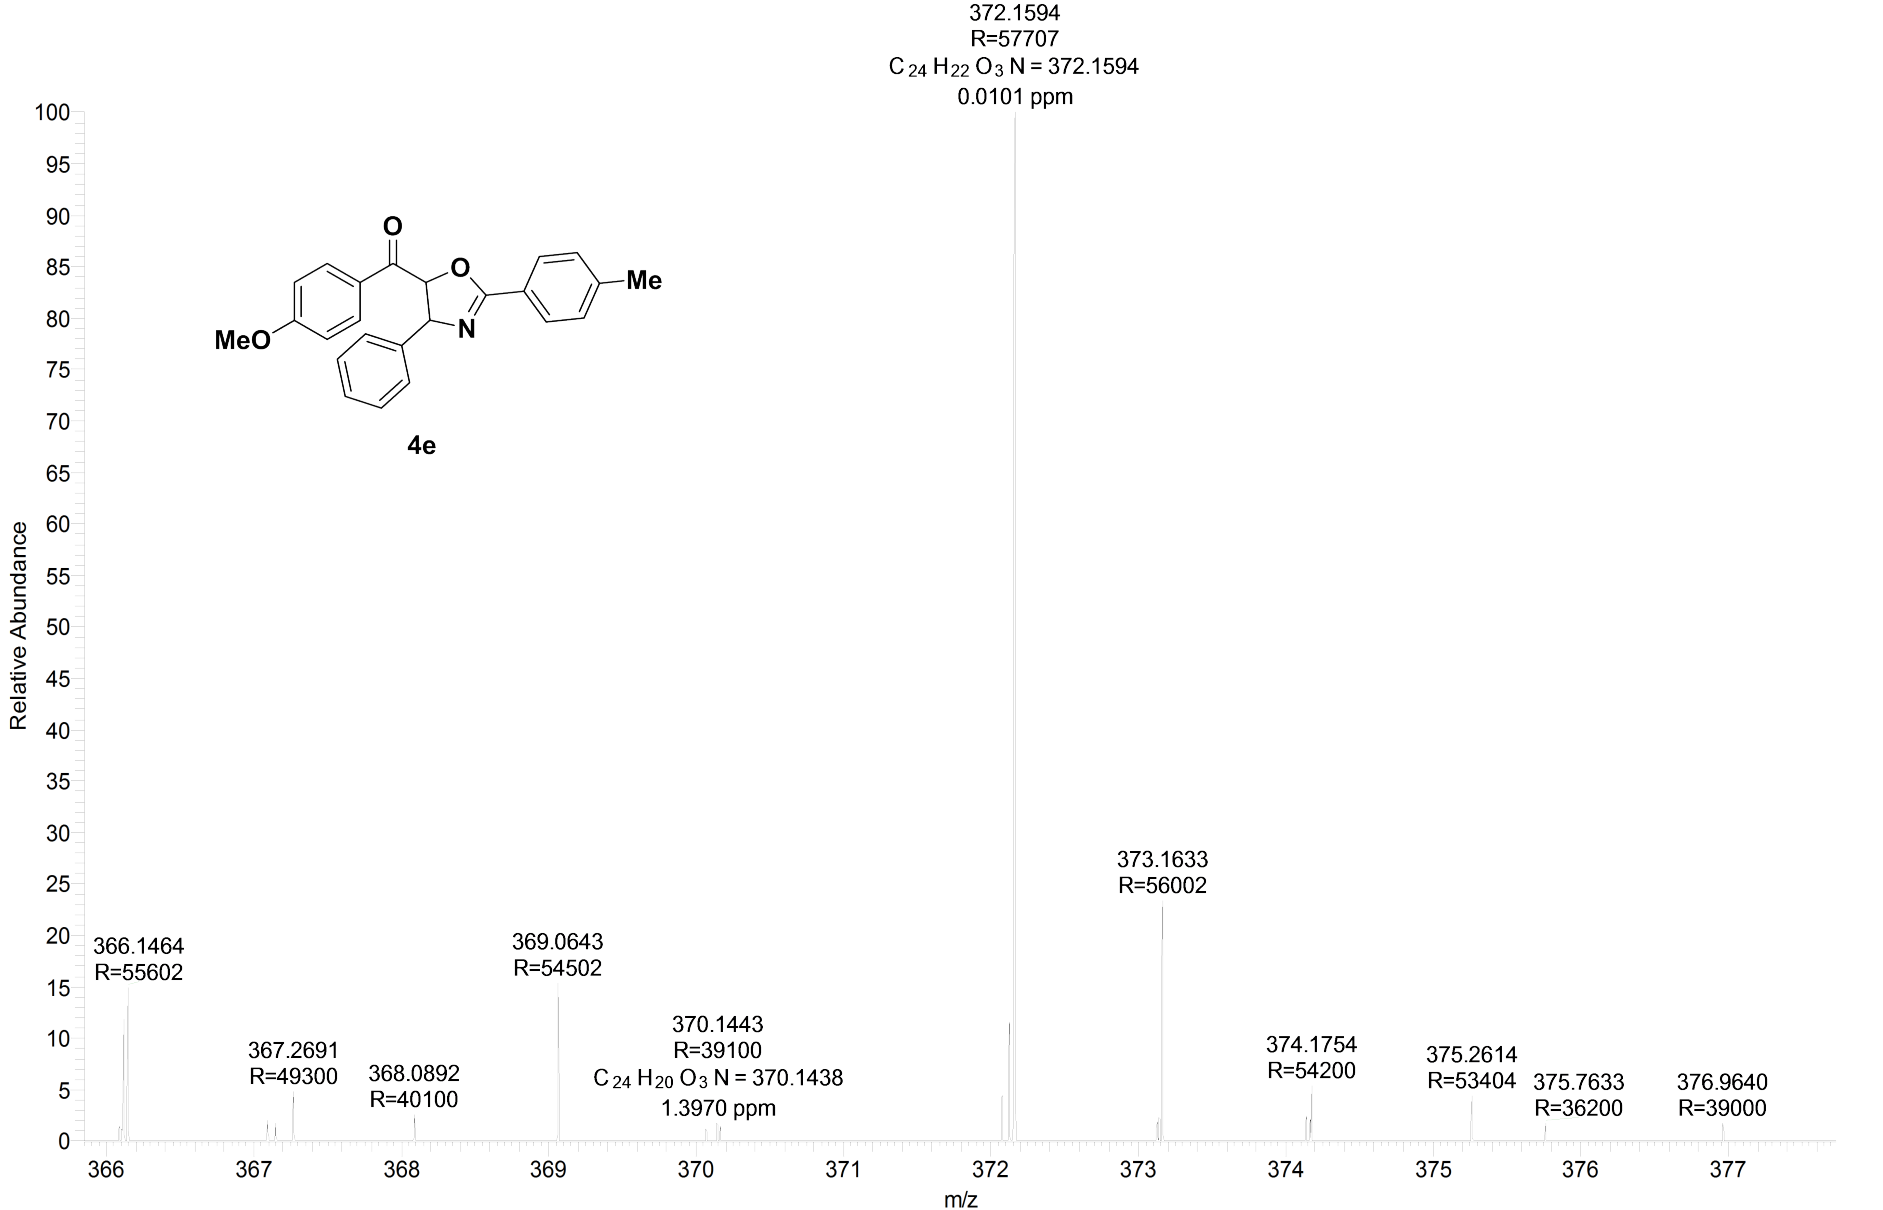

124-2 #142 RT: 0.63 AV: 1 NL: 7.68E7  
T: FTMS + p ESI Full ms [100.00-1500.00]

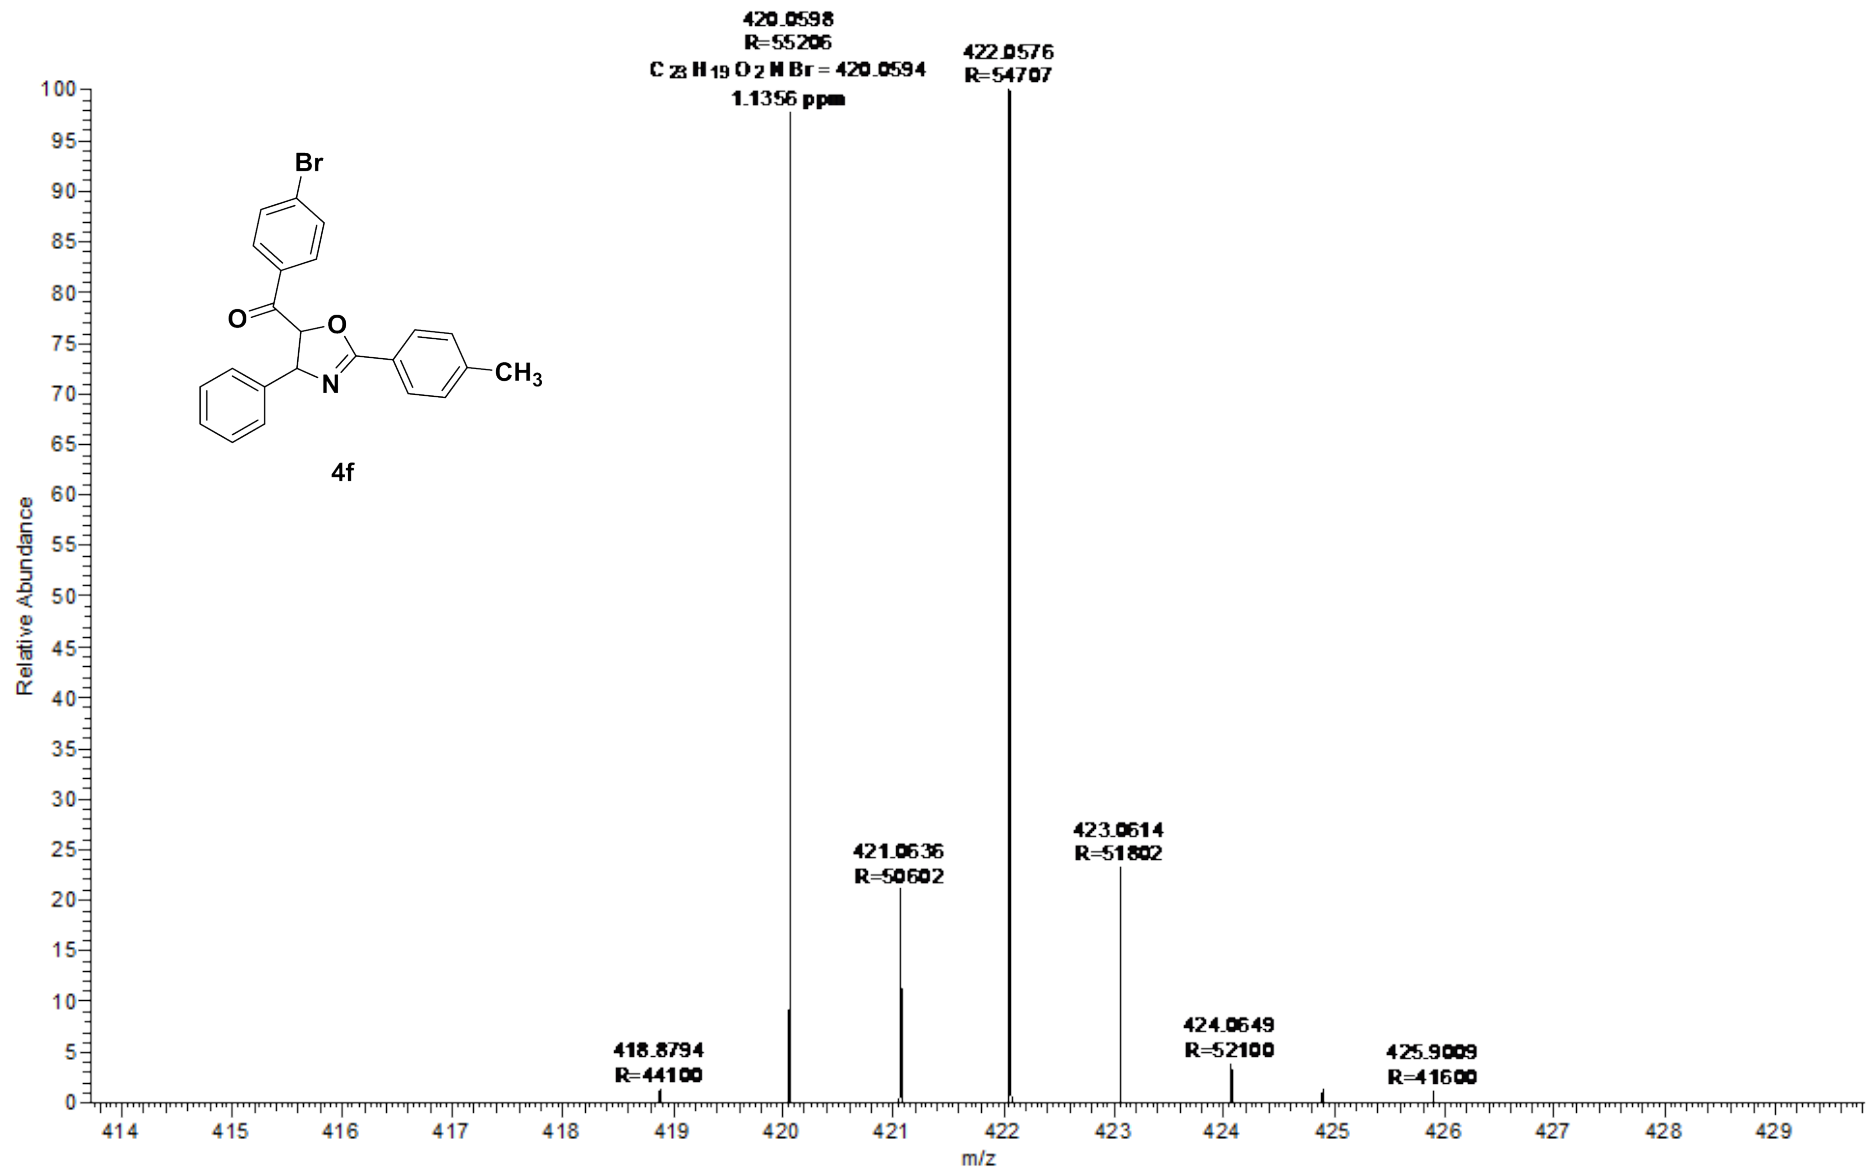

141-#162 RT: 0.72 AV: 1 NL: 1.46E 9  
T: FTMS + p ESI Full ms [100.00-1500.00]

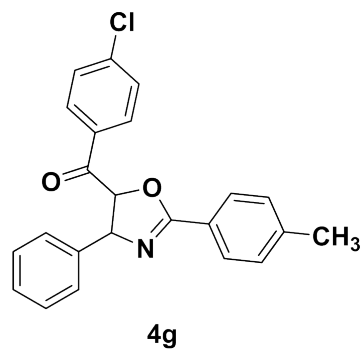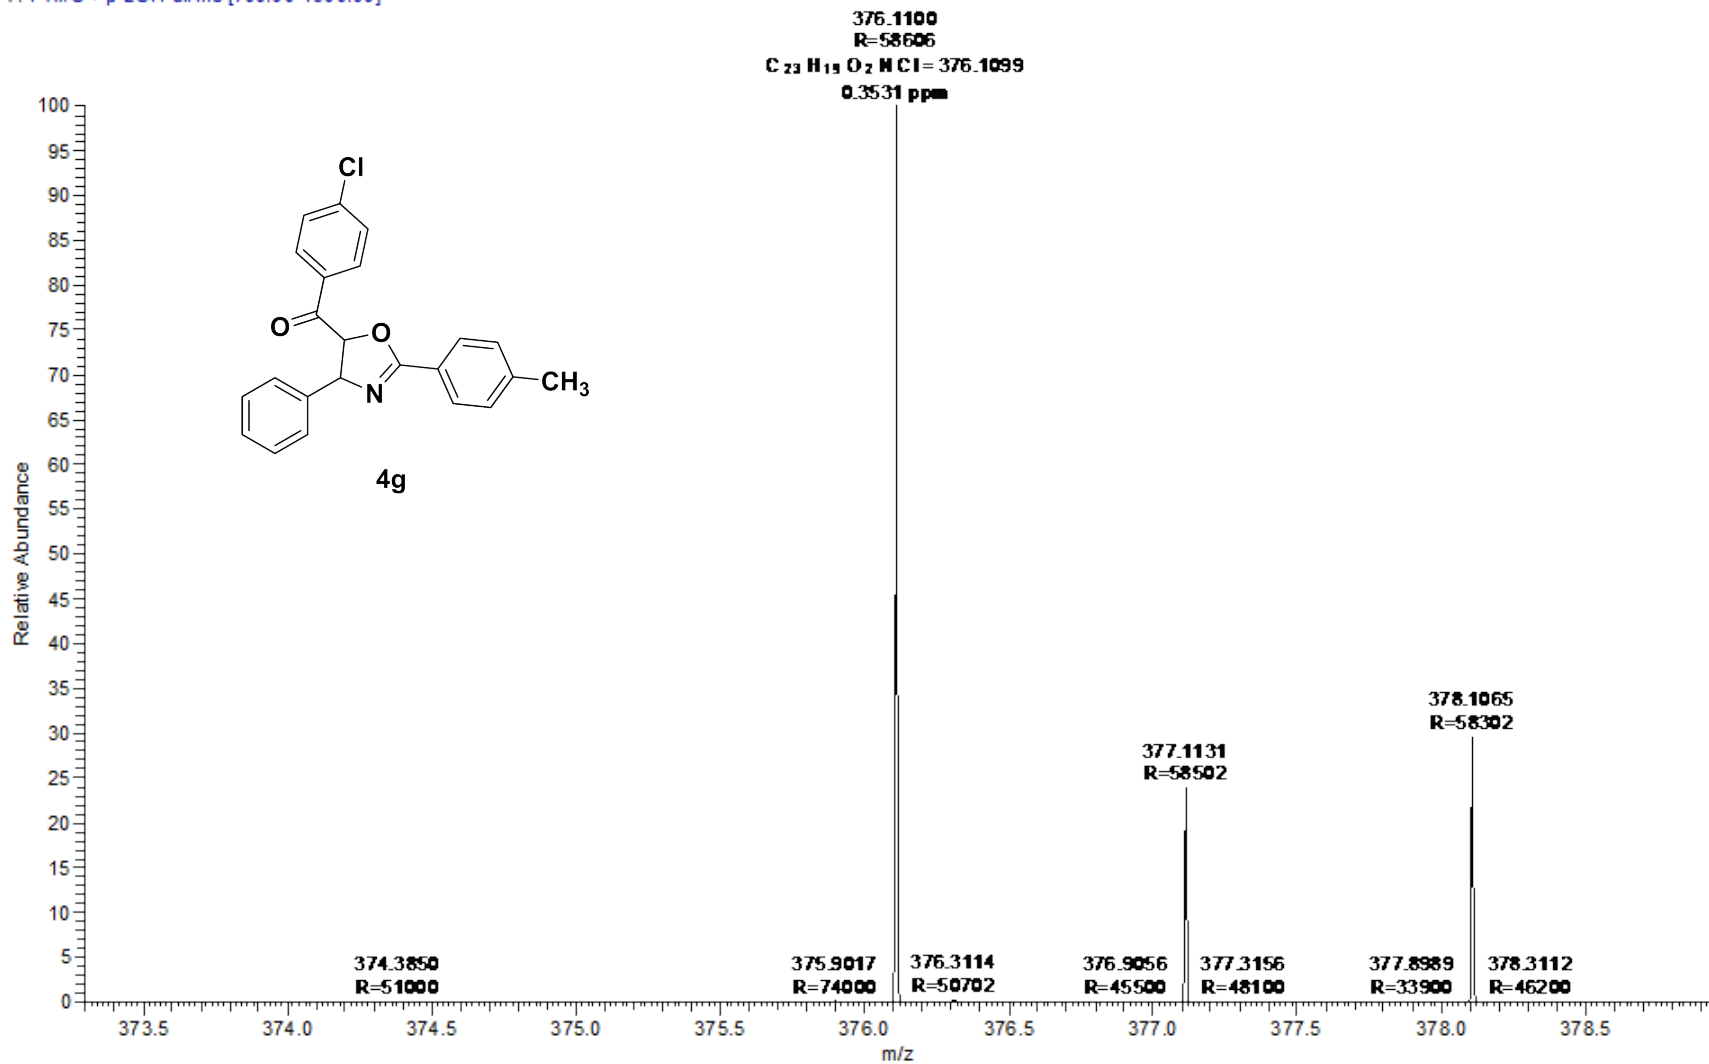

125-#146 RT: 0.65 AV: 1 NL: 3.10E9  
T: FTMS + p ESI Full ms [100.00-1500.00]

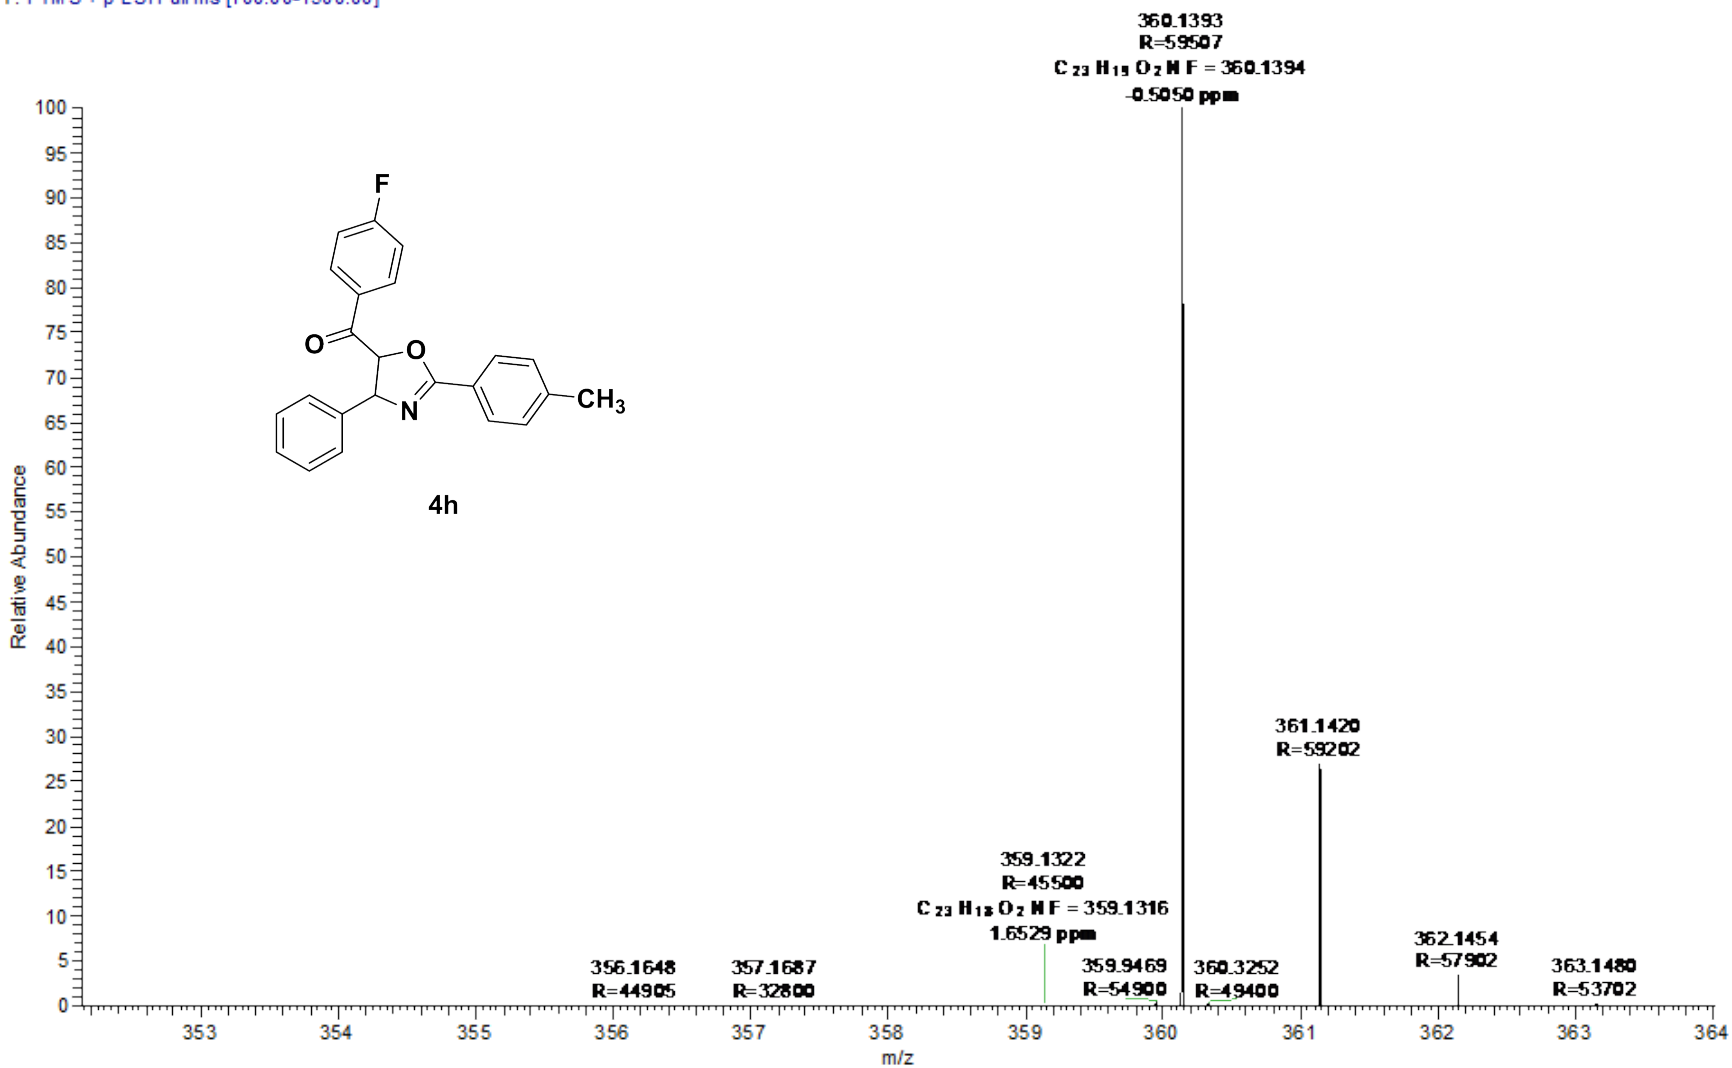



143#203 RT: 0.90 AV: 1 NL: 1.18E9  
T: FTMS + p ESI Full ms [100.00-1500.00]

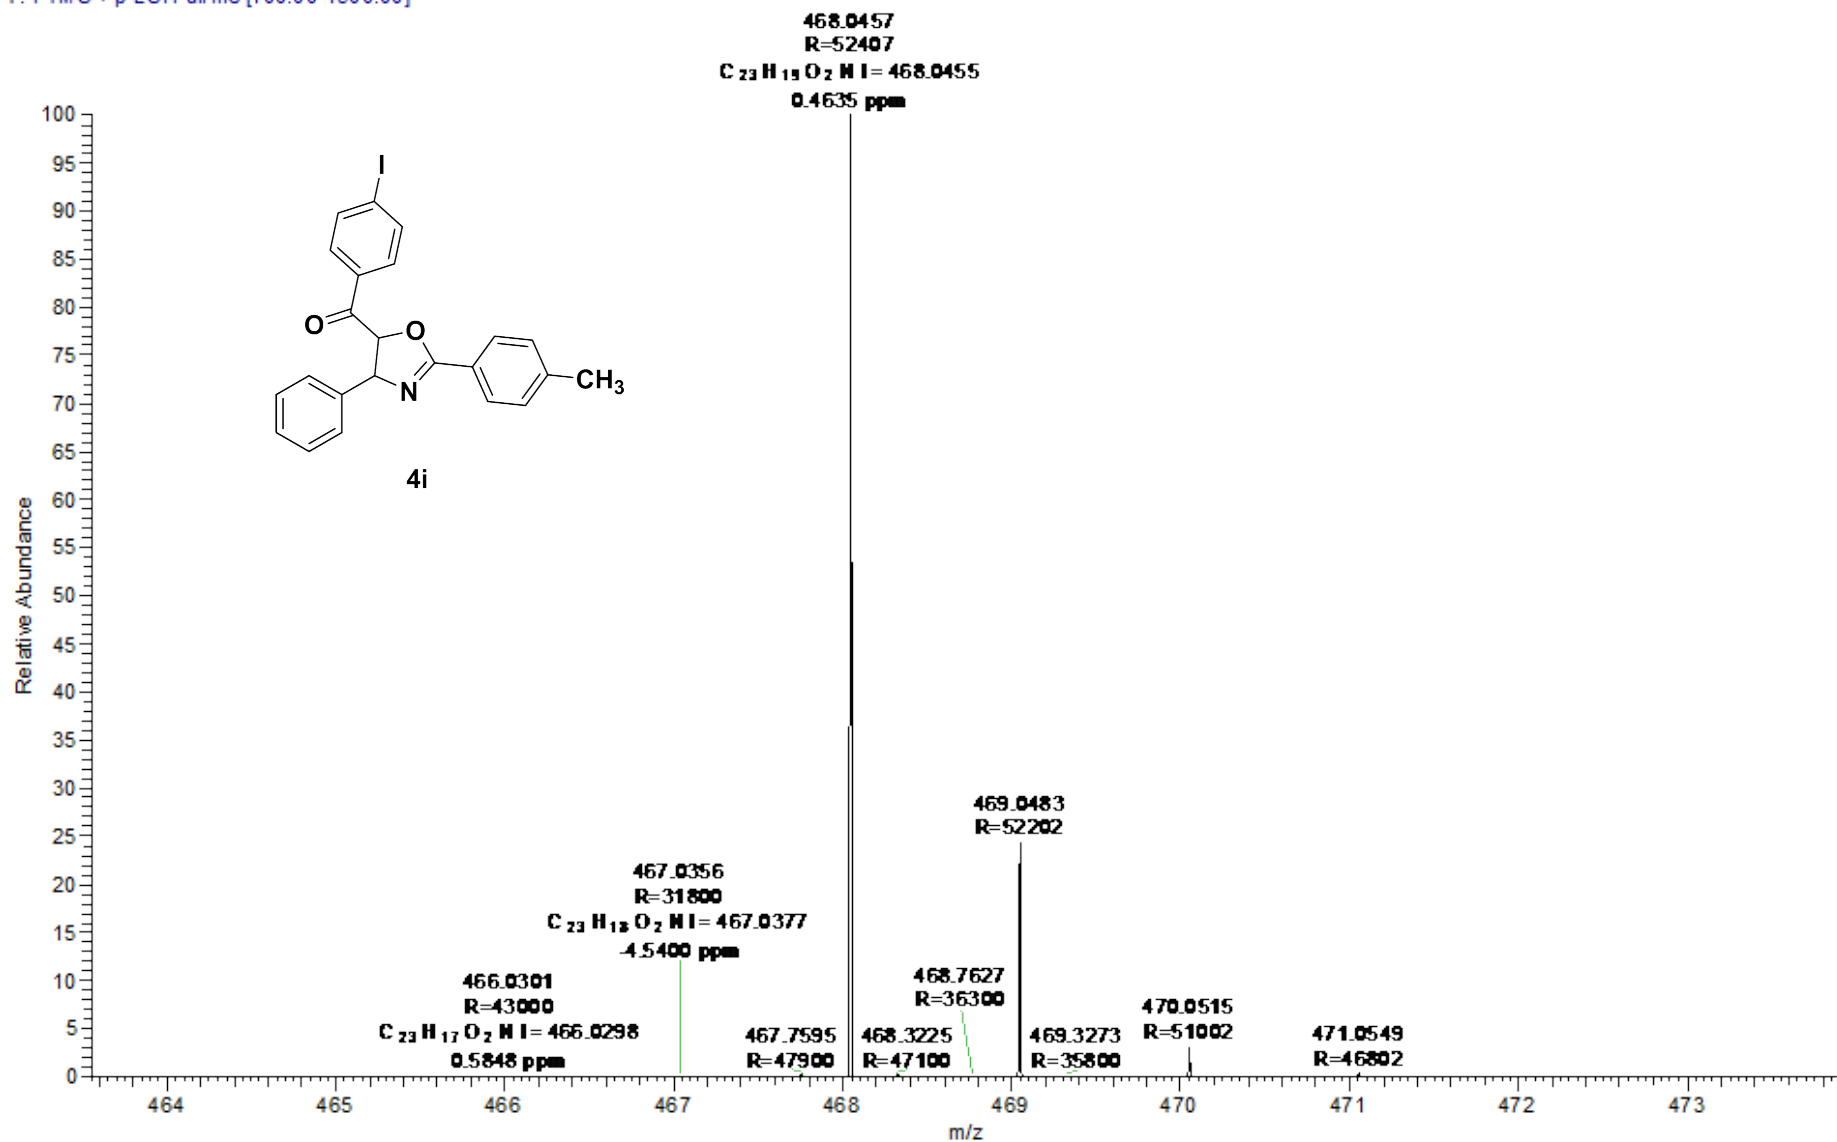

144-I #131 RT: 0.58 AV: 1 NL: 2.97E9  
T: FTM S + p ESI Full ms [100.00-1500.00]

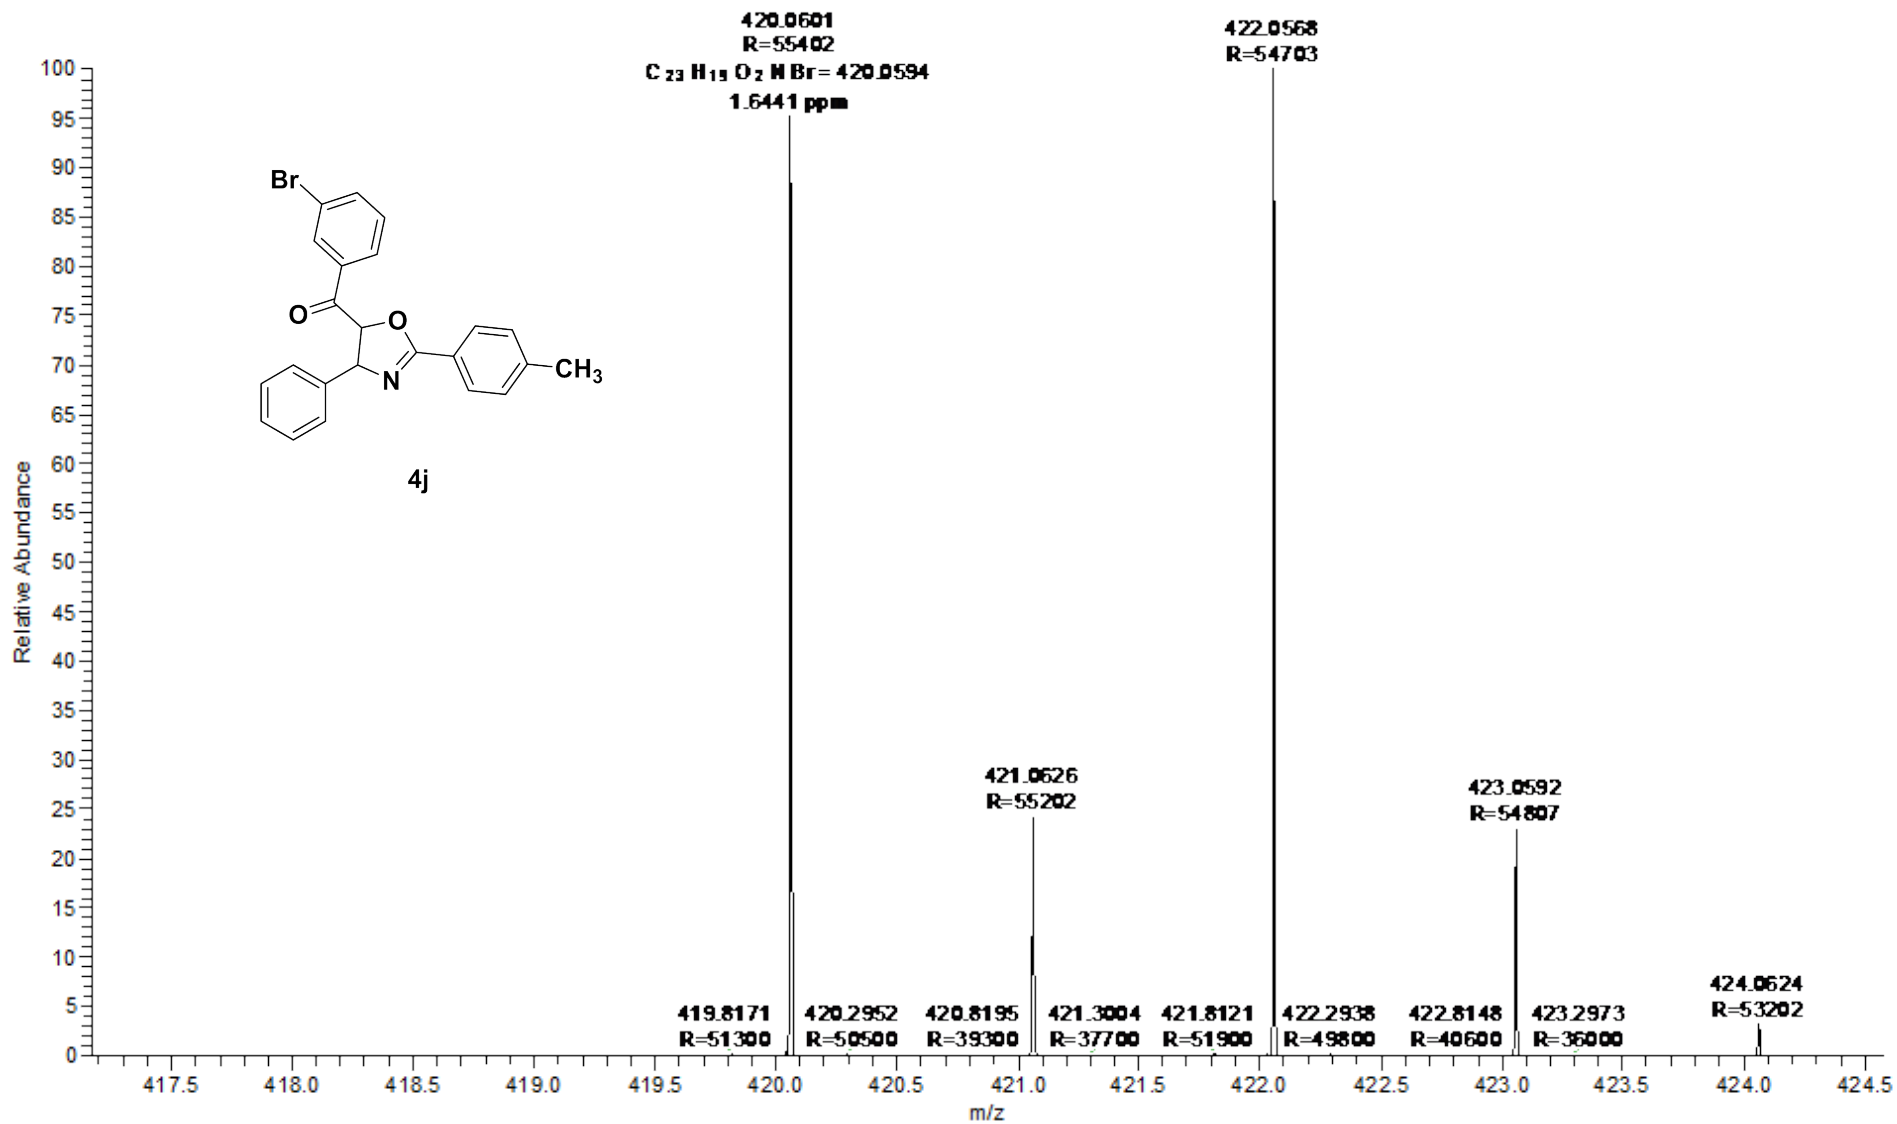

126-I #116 RT: 0.52 AV: 1 NL: 3.71E9  
T: FTMS + p ESI Full ms [100.00-1500.00]

387.1339  
R=57607  
C<sub>23</sub>H<sub>19</sub>O<sub>4</sub>N<sub>2</sub> = 387.1339  
-0.1368 ppm

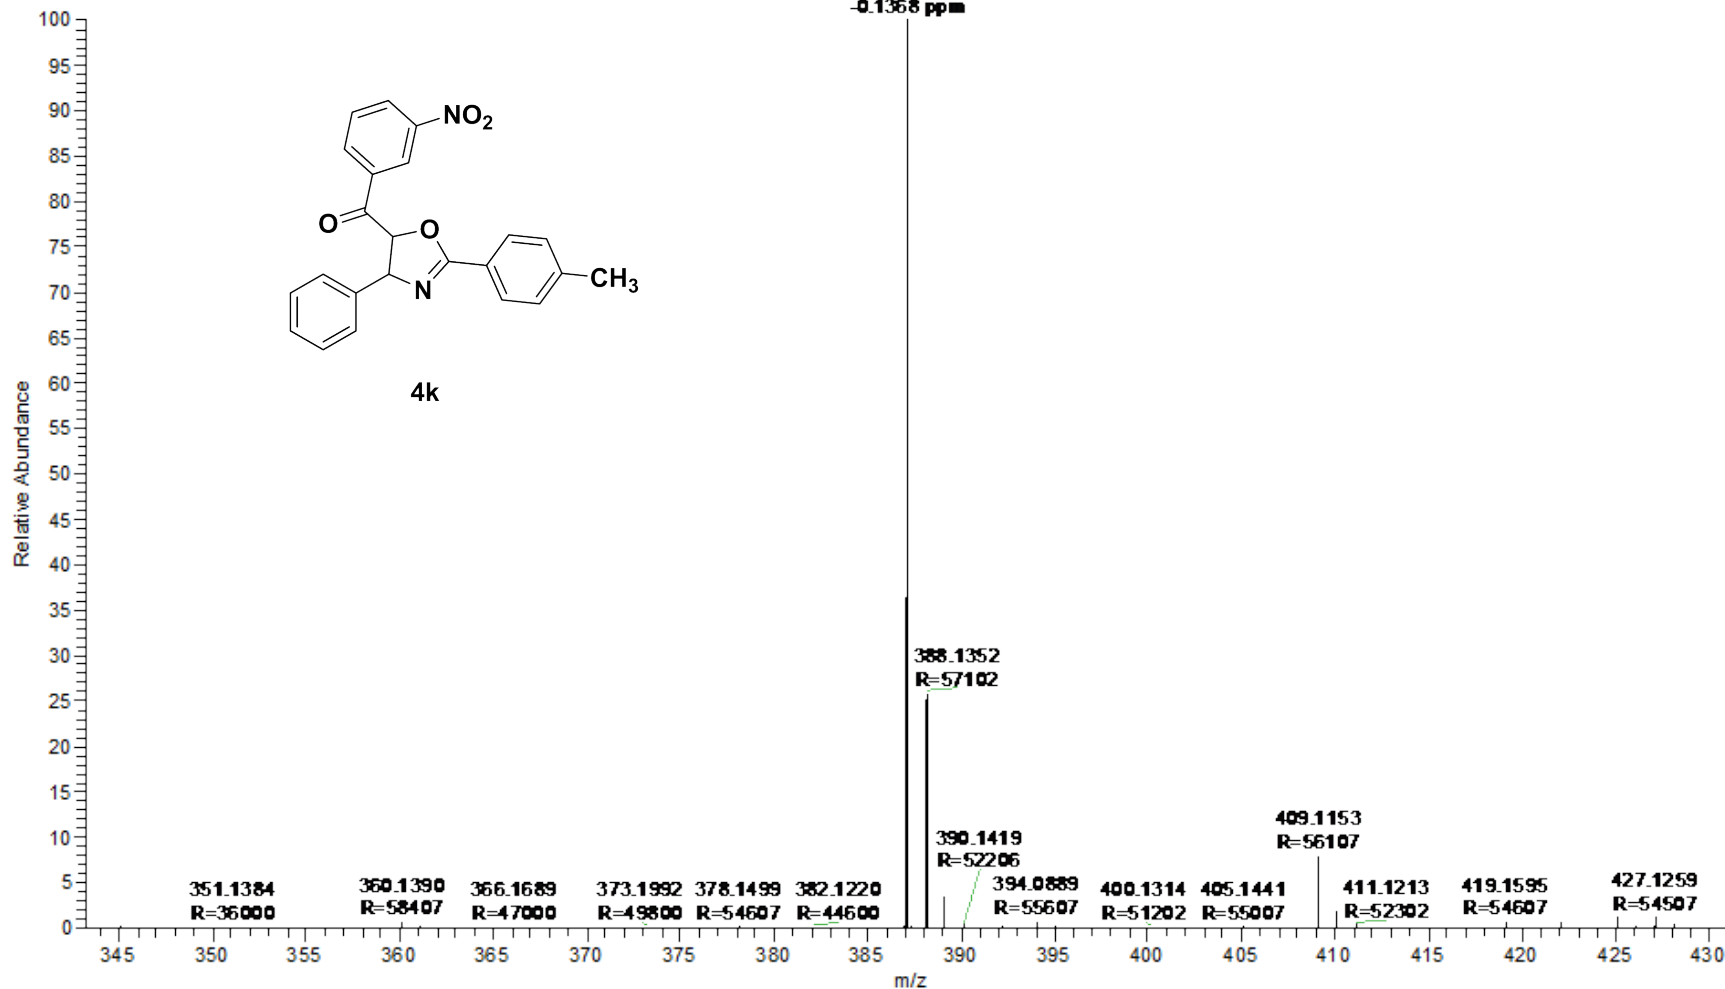

127- #183 RT: 0.81 AV: 1 NL: 1.02E9  
T: FTMS + p ESI Full ms [100.00-1500.00]

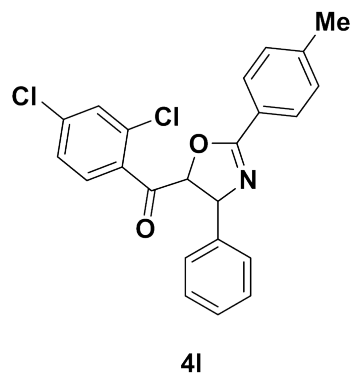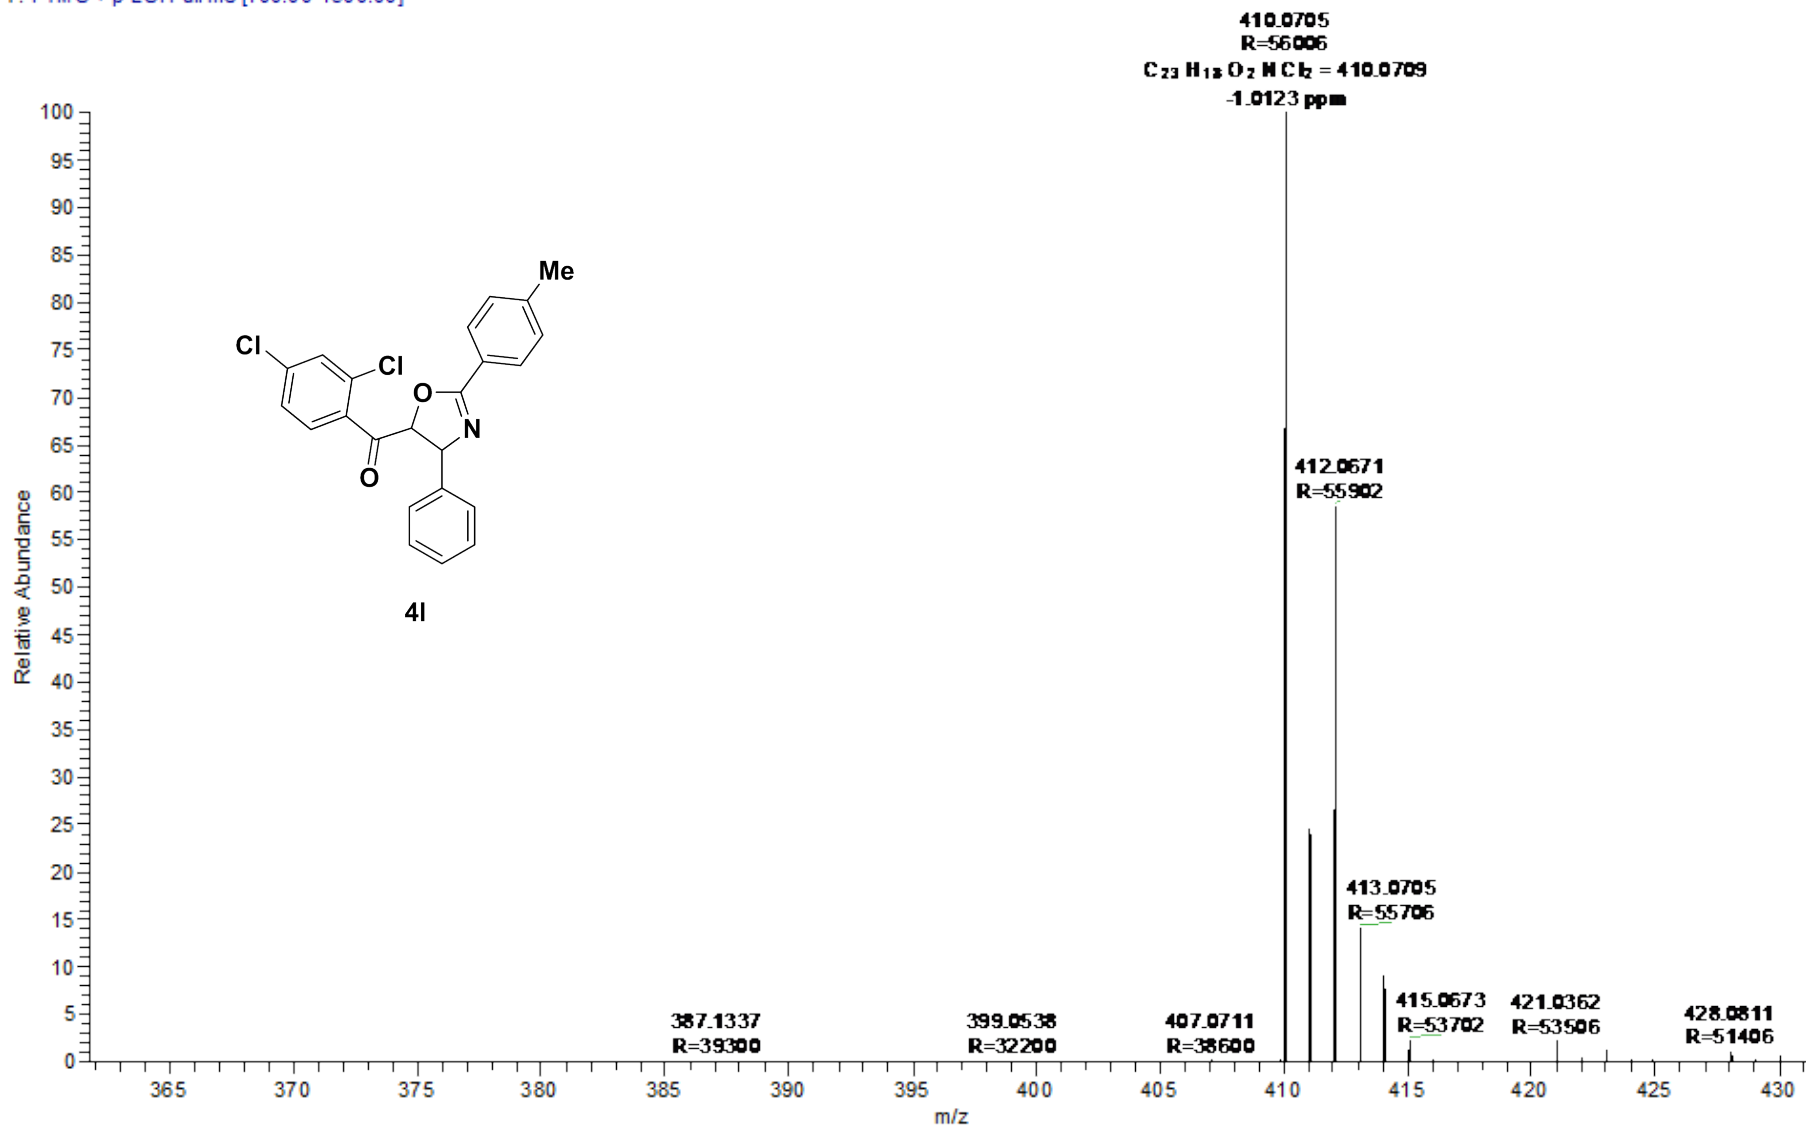

BP-128-I #122 RT: 0.54 AV: 1 NL: 6.28E9  
T: FTM S + p ESI Full ms [100.00-1500.00]

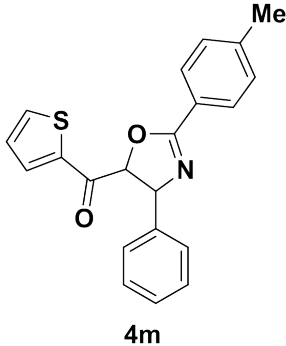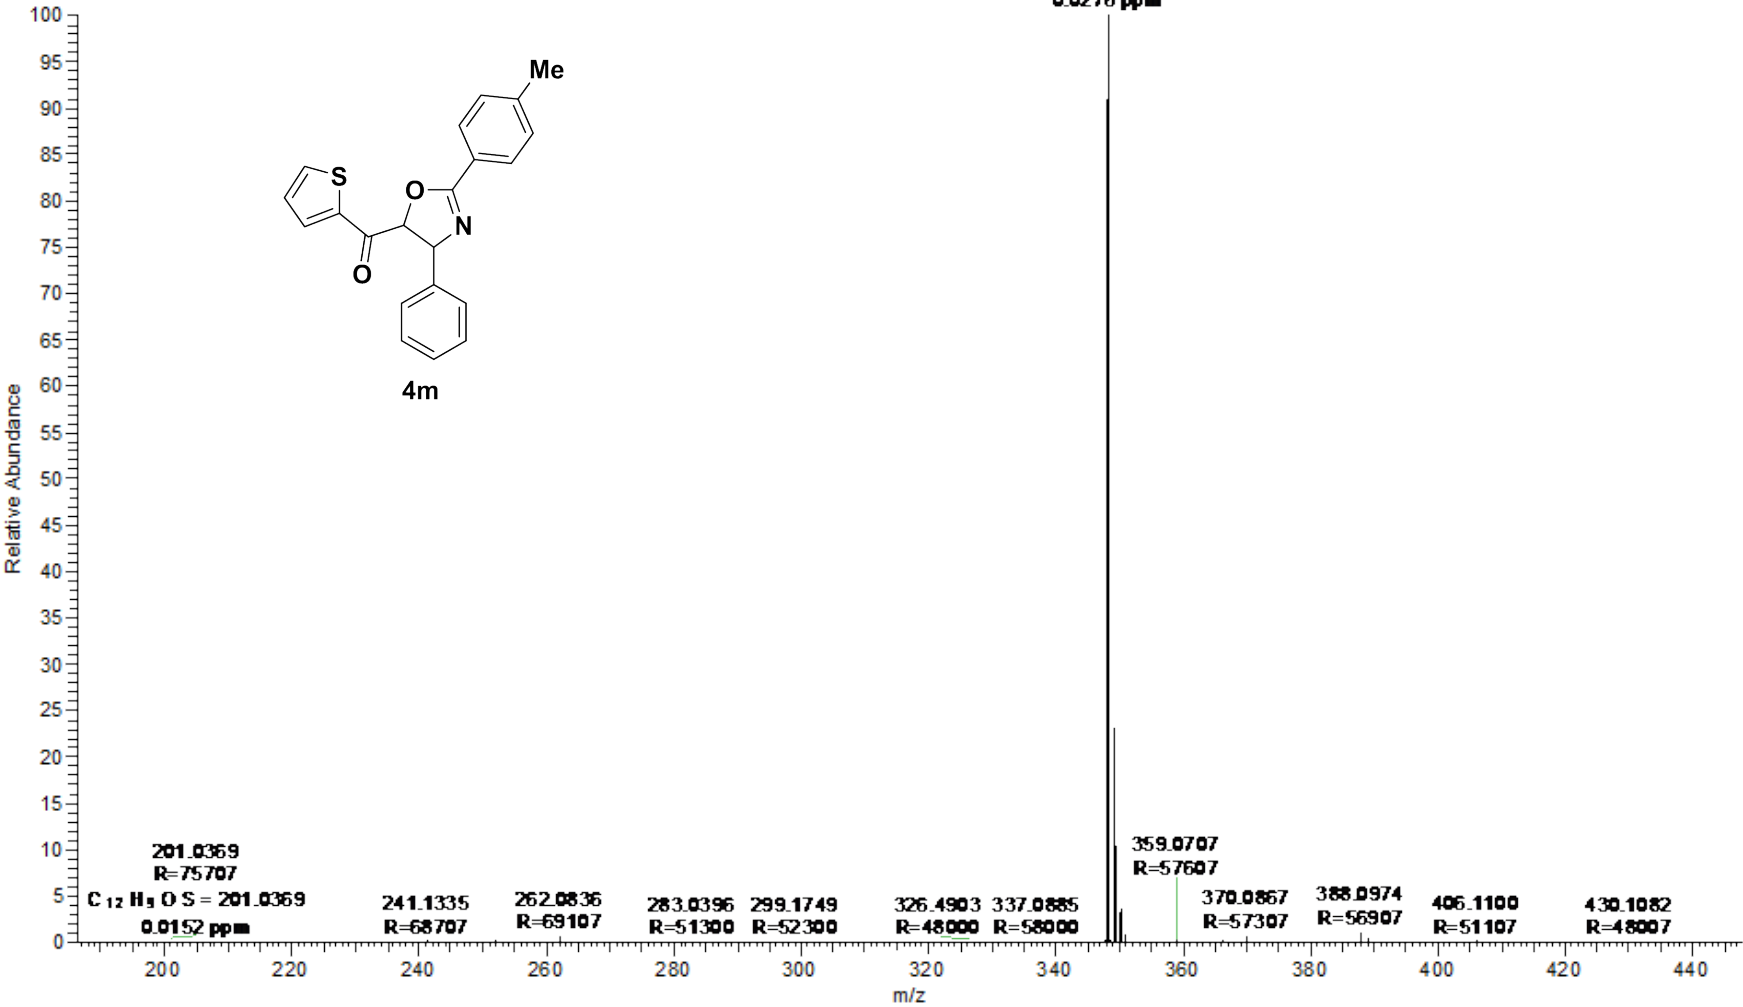

AZ-5 #145 RT: 0.64 AV: 1 NL: 5.49E8  
T: FTM S + p ESI Full ms [100.00-1500.00]

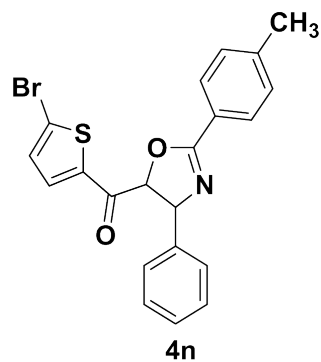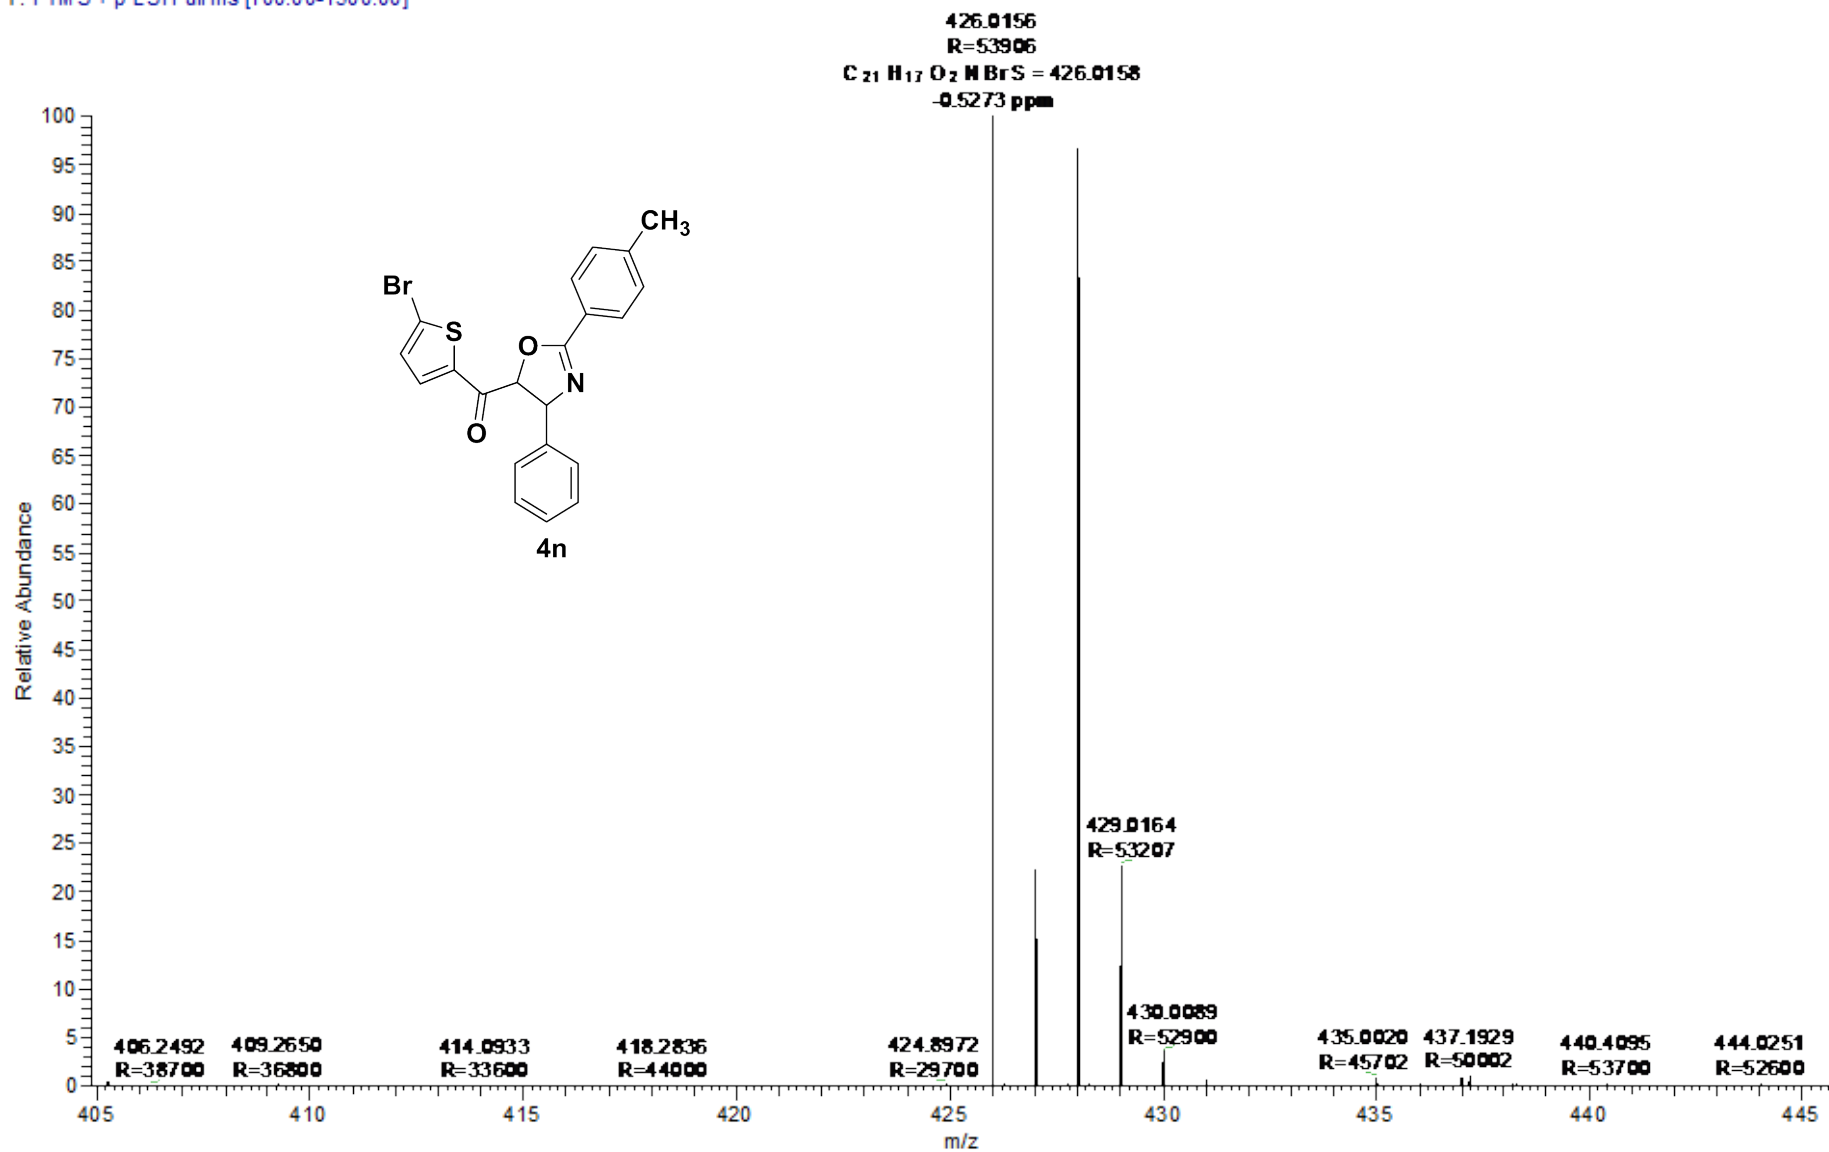

129 #133 RT: 0.59 AV: 1 NL: 8.24E6  
T: FTMS + p ESI Full ms [100.00-1500.00]

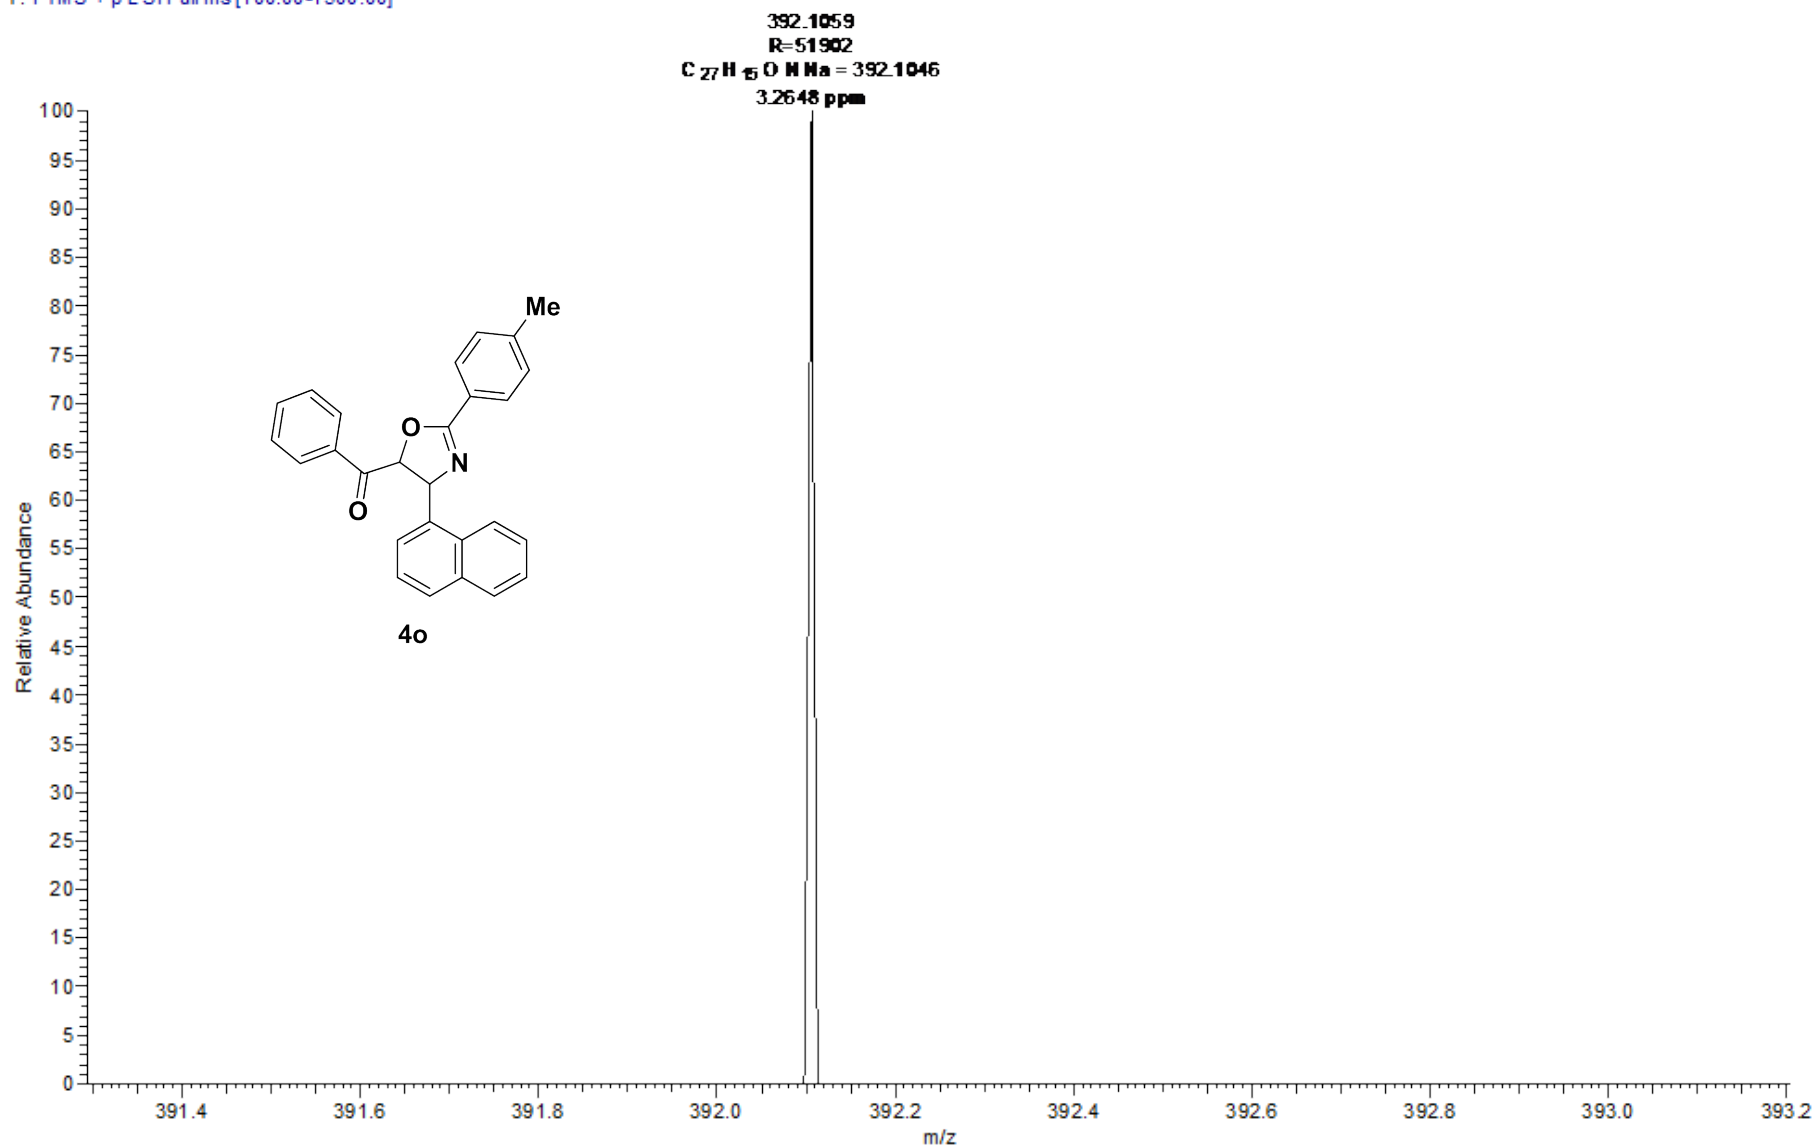

132-#129 RT: 0.57 AV: 1 NL: 3.22E9  
T: FTM S + p ESI Full ms [100.00-1500.00]

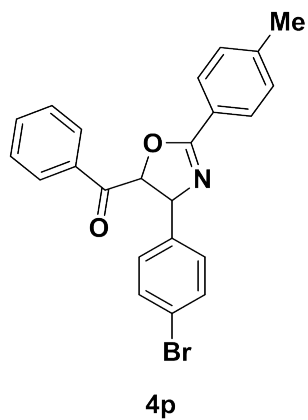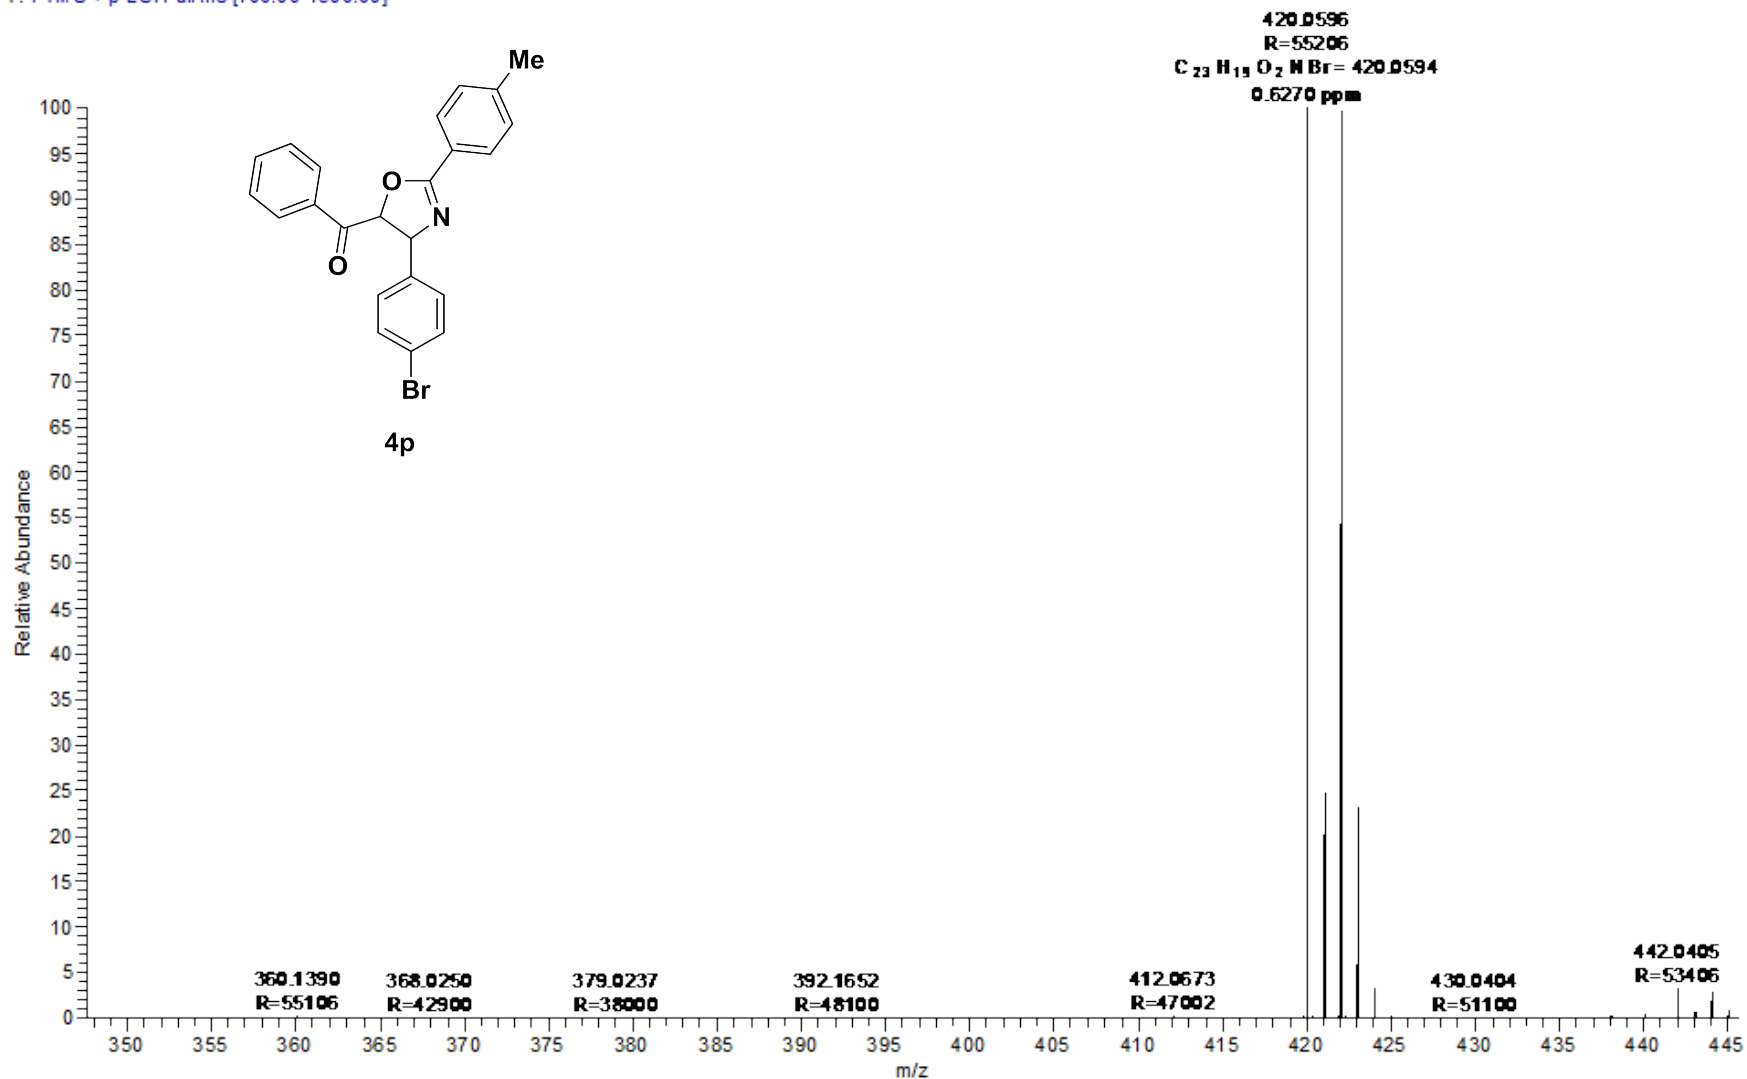



RK-6#114 RT: 0.51 AV: 1 NL: 3.23E9  
T: FTMS +p ESI Full ms [100.00-1500.00]

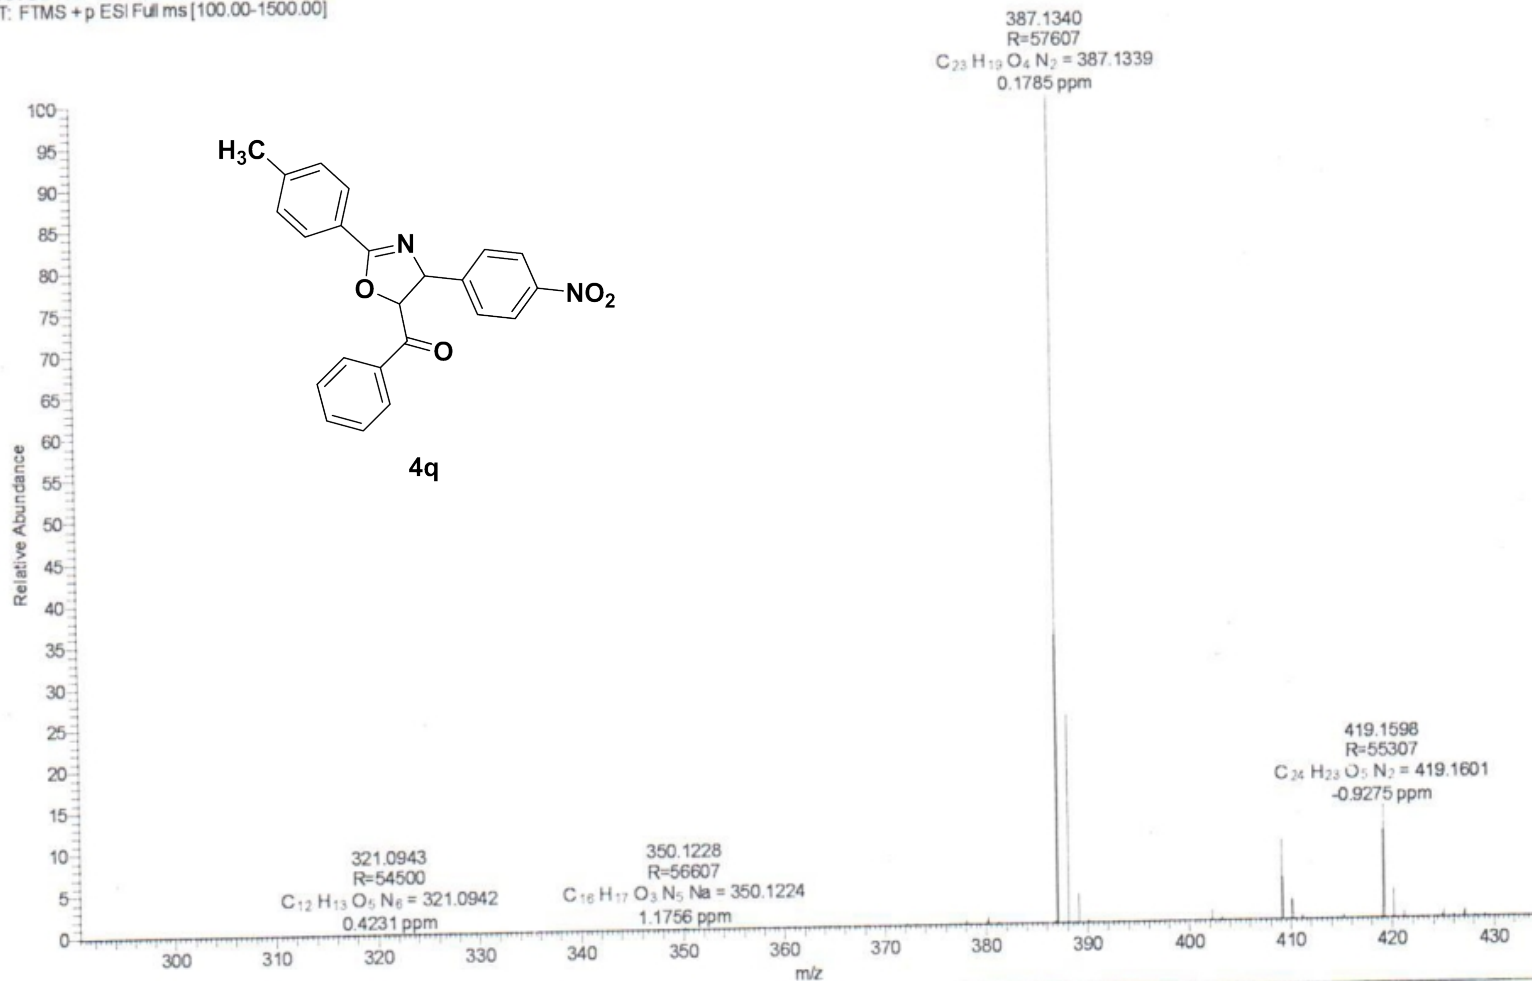

RK-2 160225124016 #145 RT: 0.64 AV: 1 NL: 2.39E9  
T: FTMS +p ESI Full ms [100.00-1500.00]

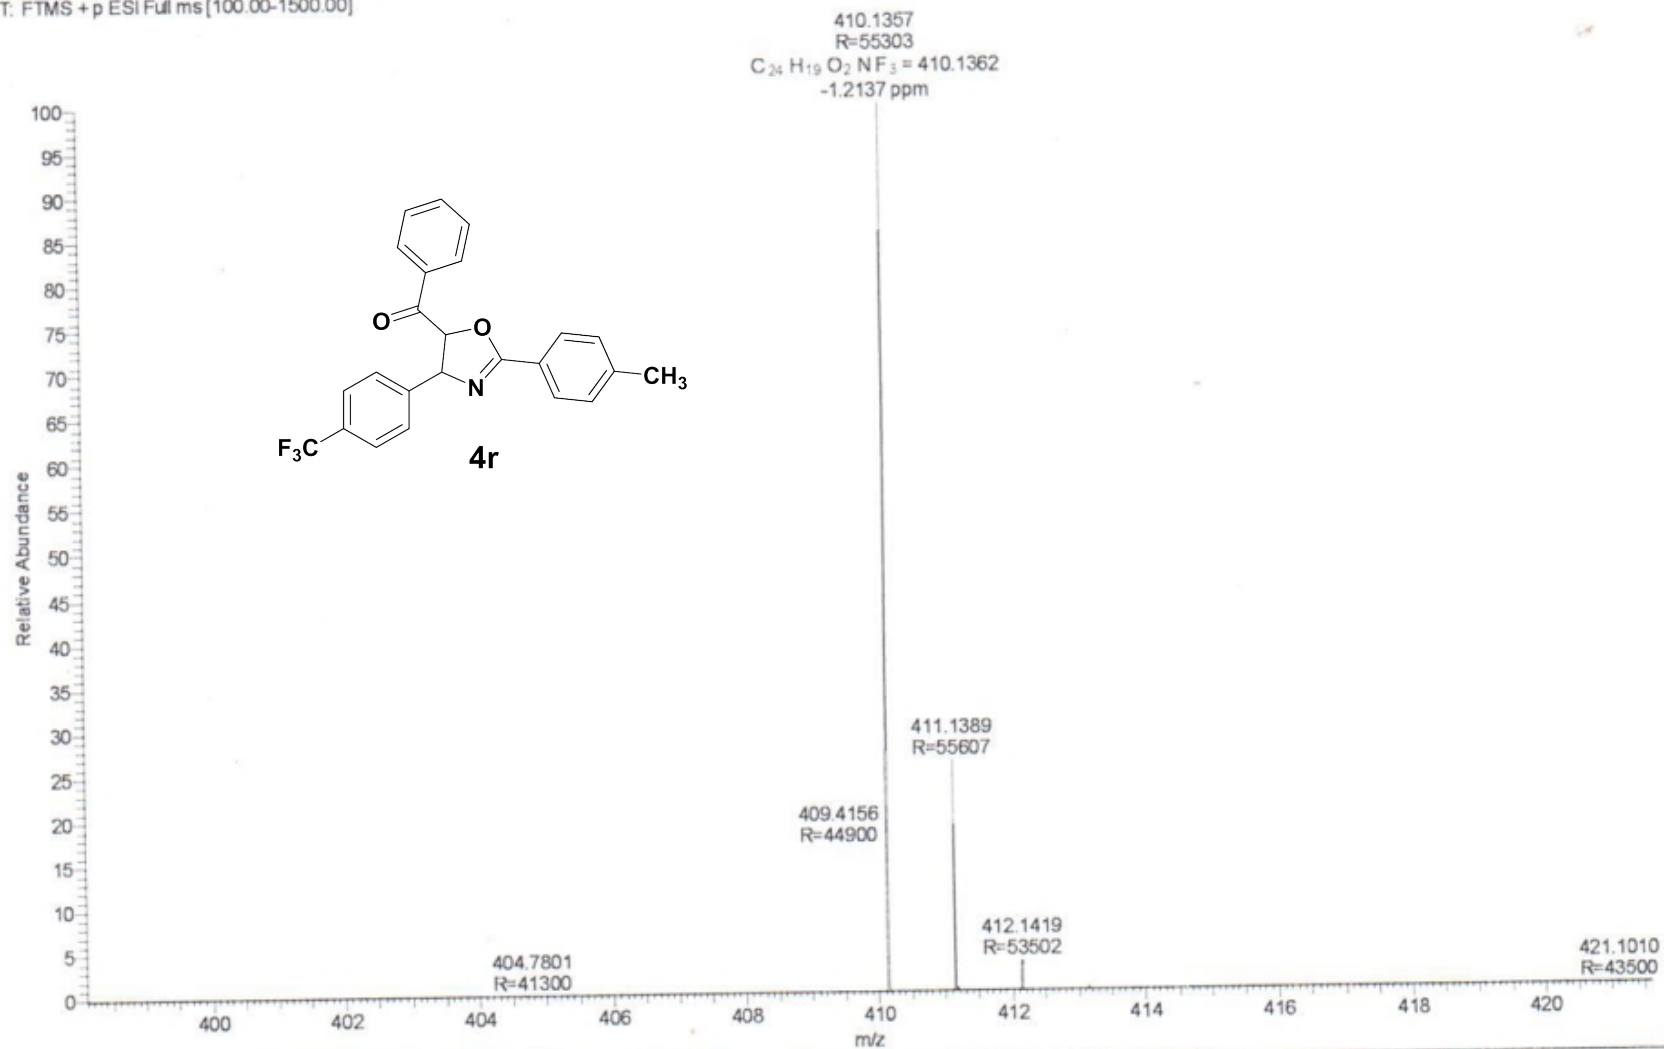

147- #171 RT: 0.76 AV: 1 NL: 6.78E8  
T: FTMS + p ESI Full ms [100.00-1500.00]

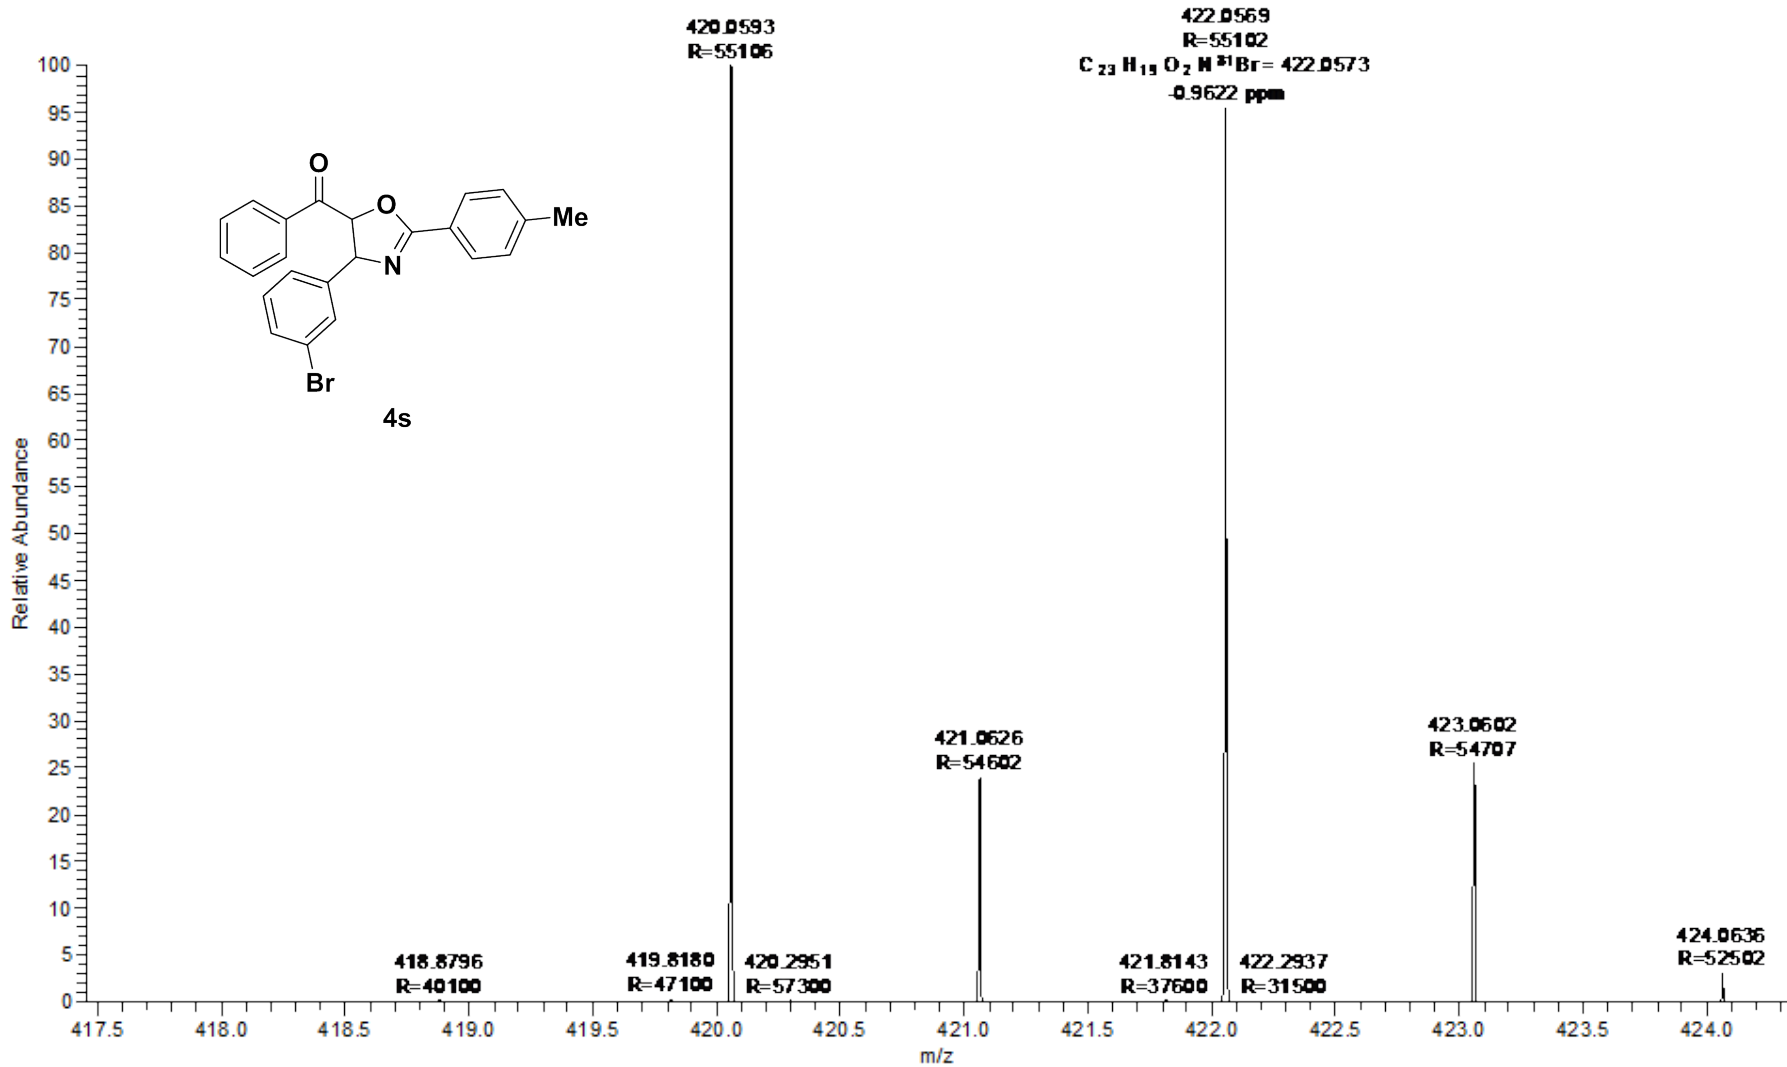

1504 #127 RT: 0.56 AV: 1 NL: 6.38E9  
T: FTMS + p ESI Full ms [100.00-1500.00]

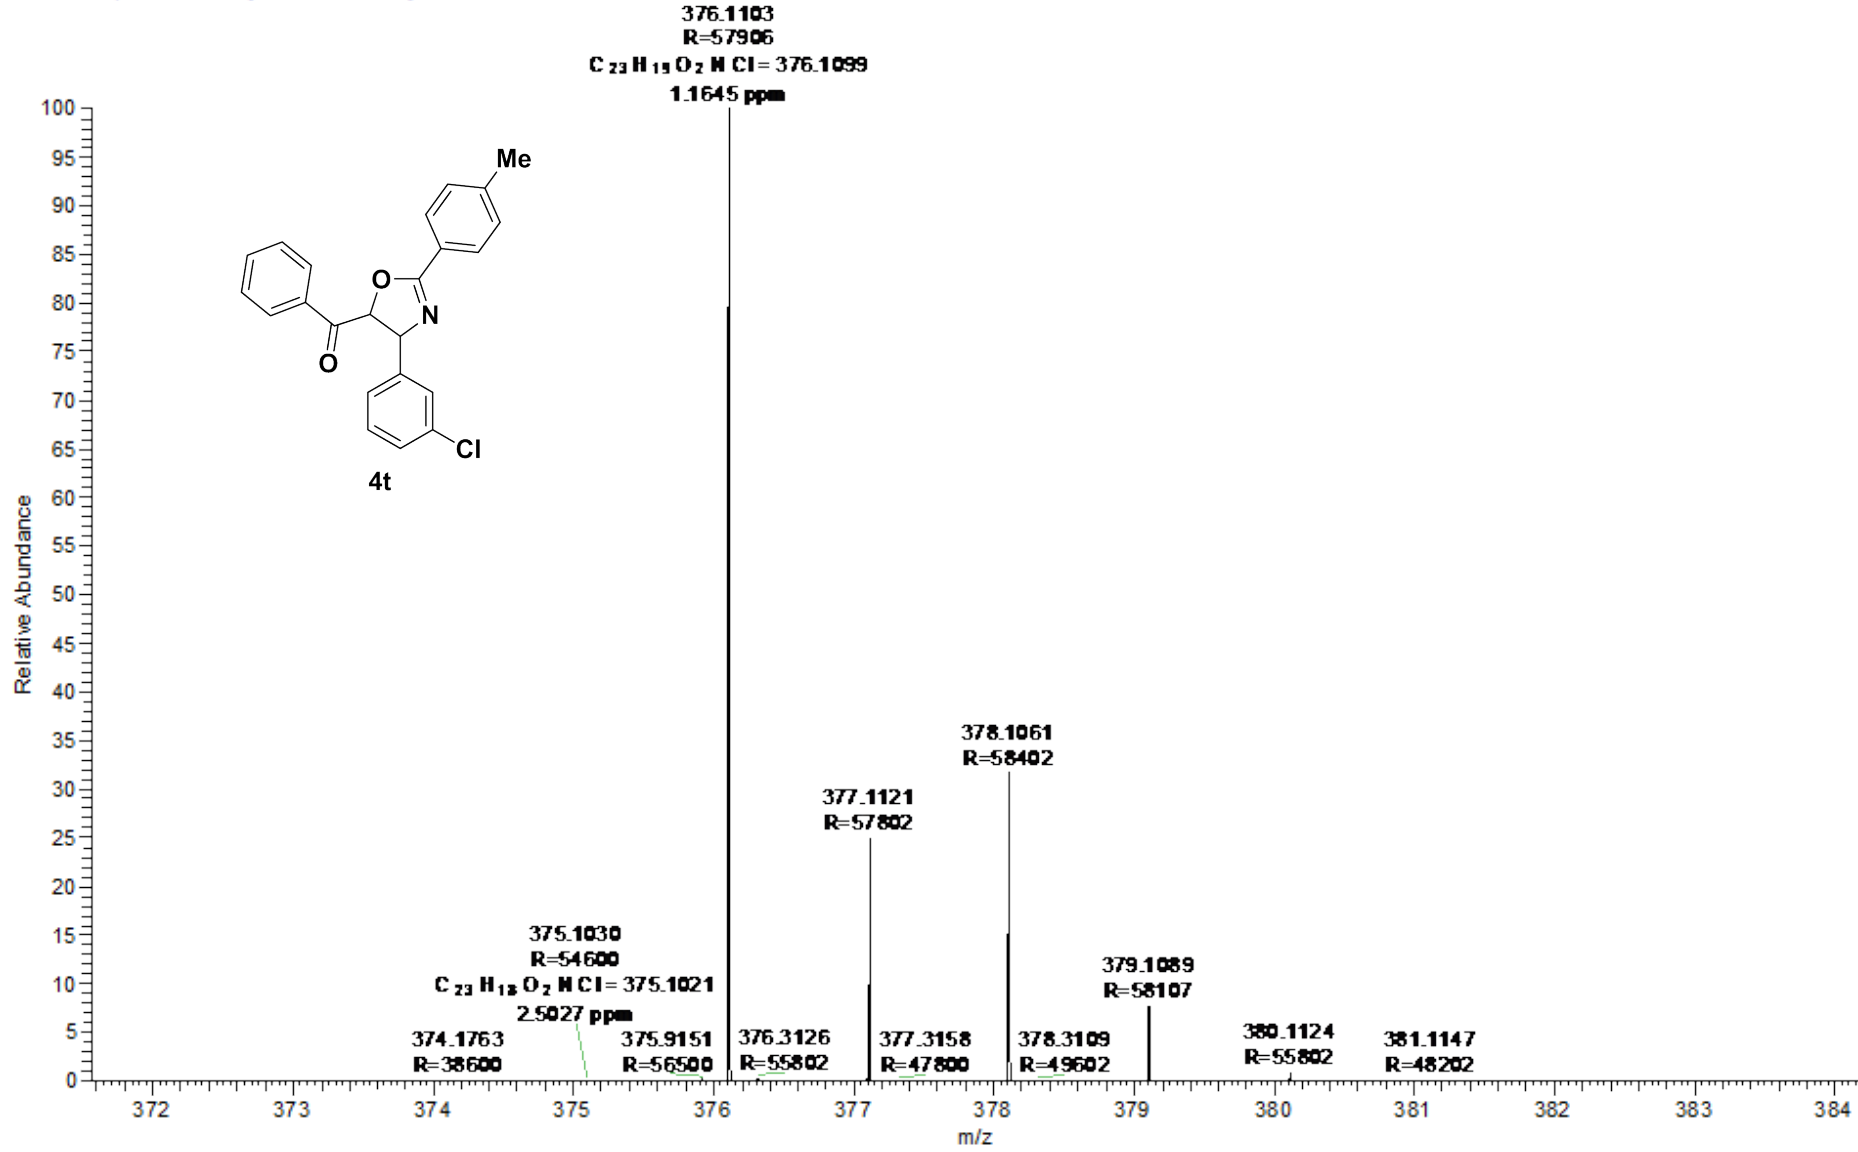

146 #154 RT: 0.68 AV: 1 NL: 3.61E9  
T: FTMS + p ESI Full ms [100.00-1500.00]

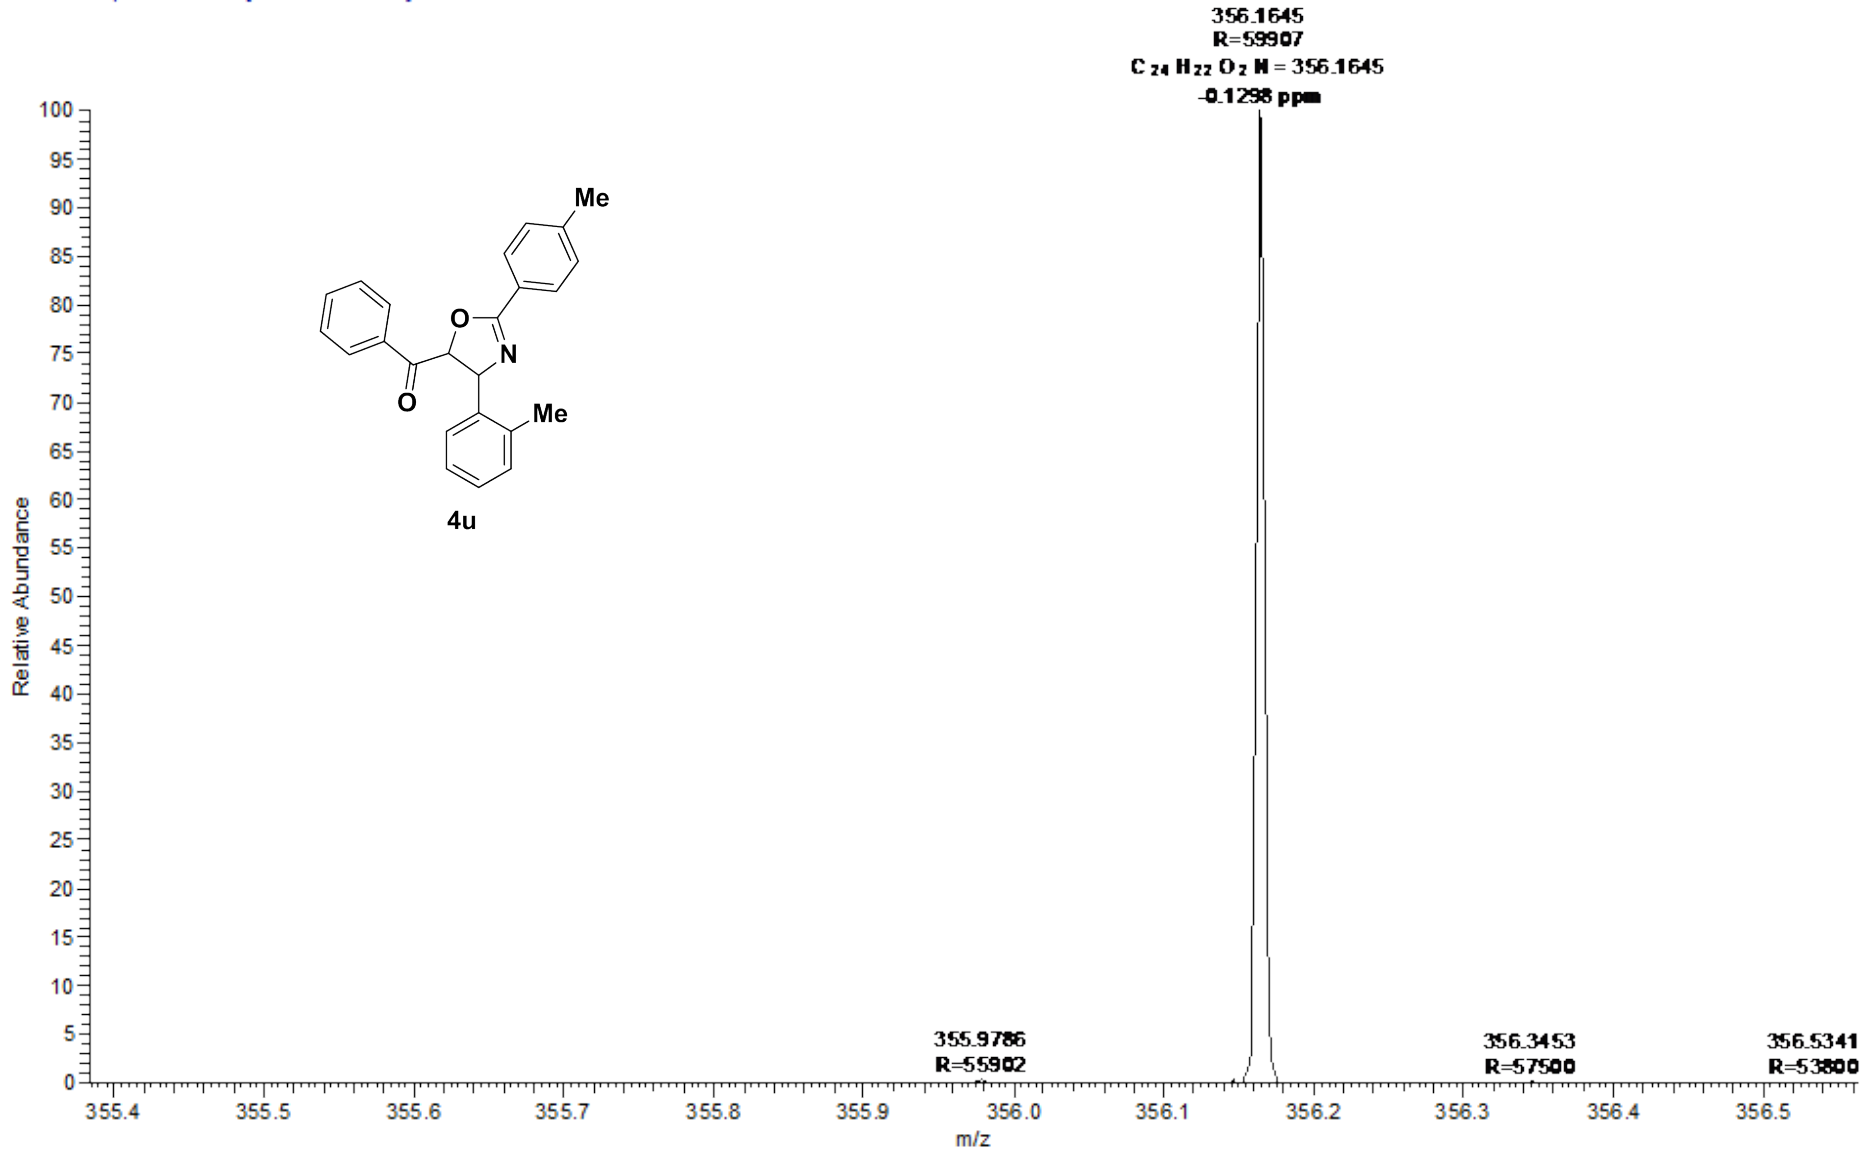

133-I #168 RT: 0.75 AV: 1 NL: 4.59E9  
T: FTMS + p ESI Full ms [100.00-1500.00]

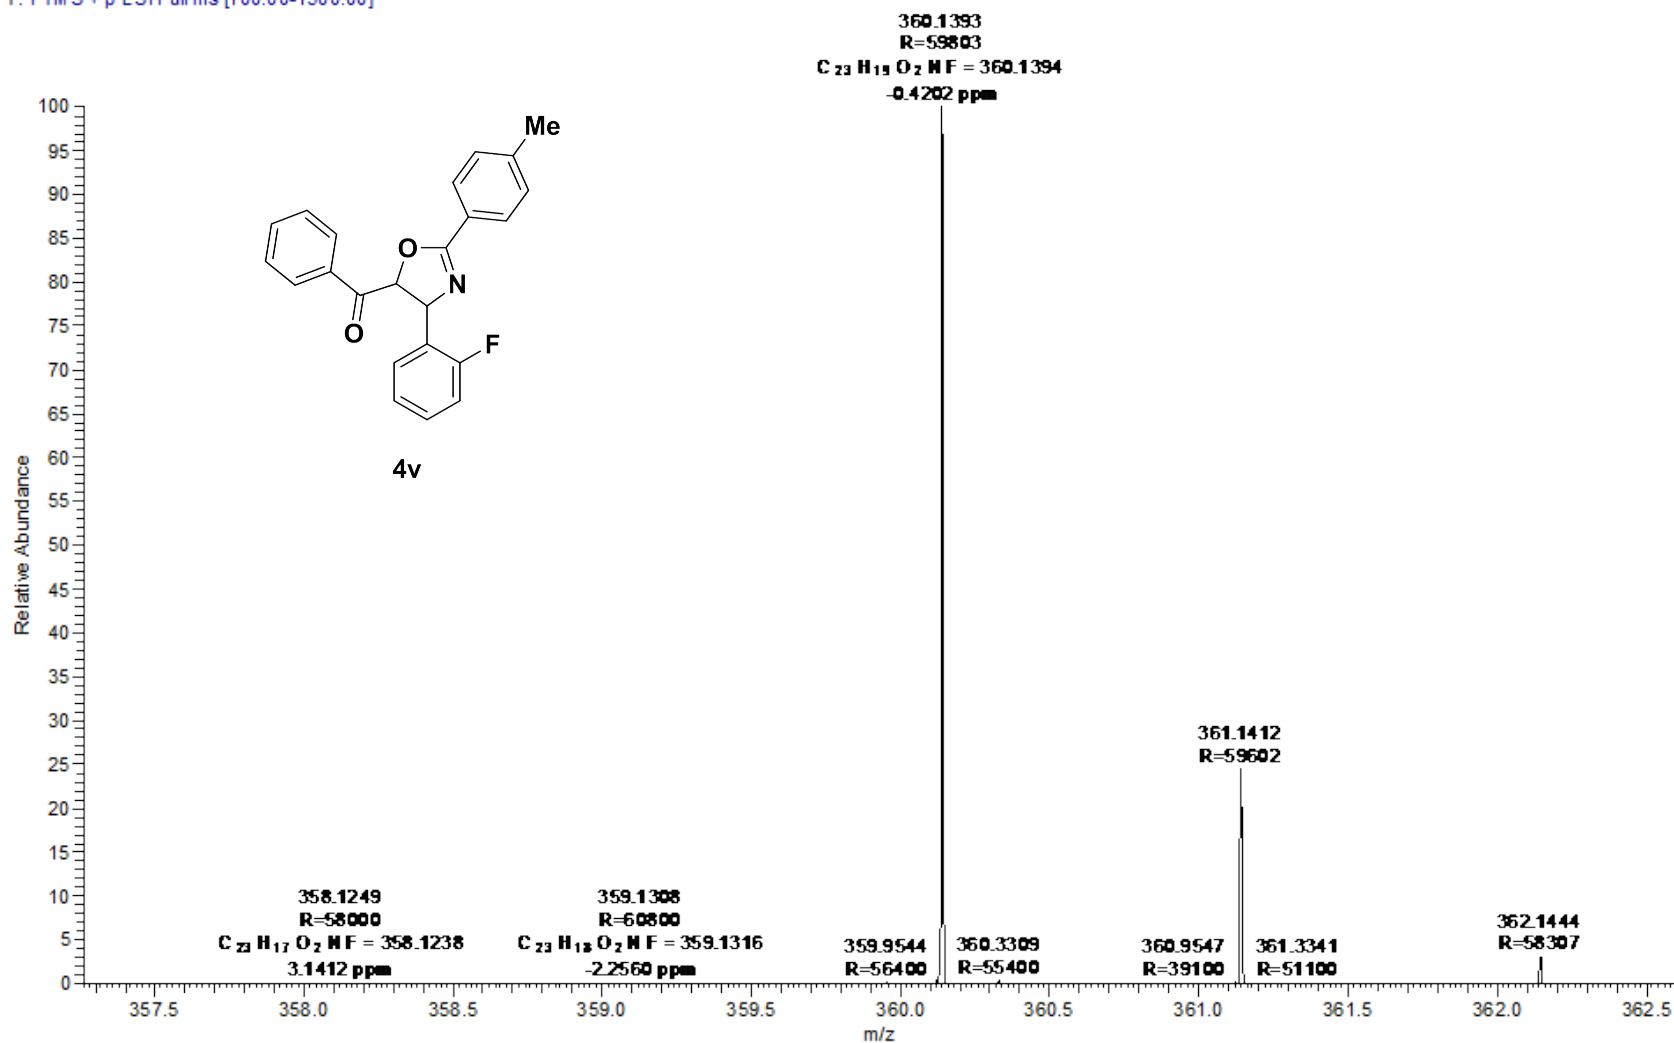

134#150 RT: 0.67 AV: 1 NL: 2.20E9  
T: FTMS + p ESI Full ms [100.00-1500.00]

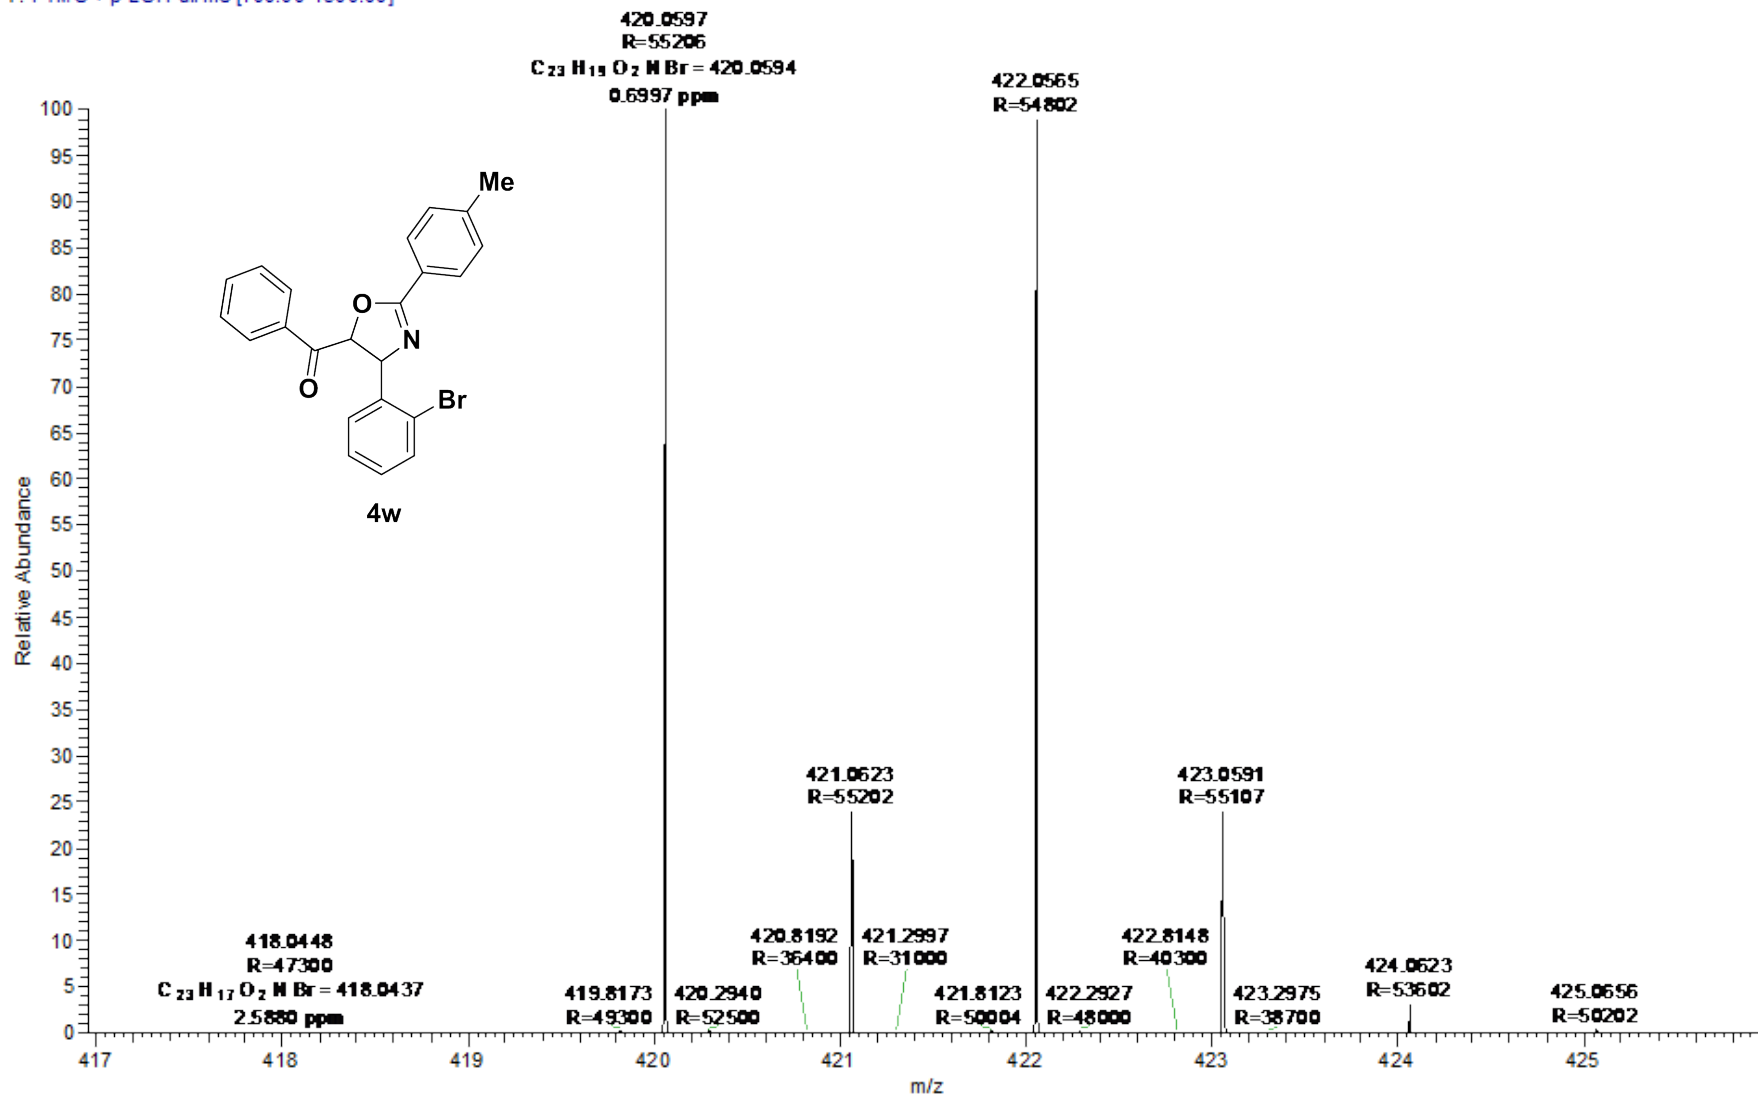

RK-5 160225124636 #117 RT: 0.52 AV: 1 NL: 7.59E9  
T: FTMS +p ESI Full ms[100.00-1500.00]

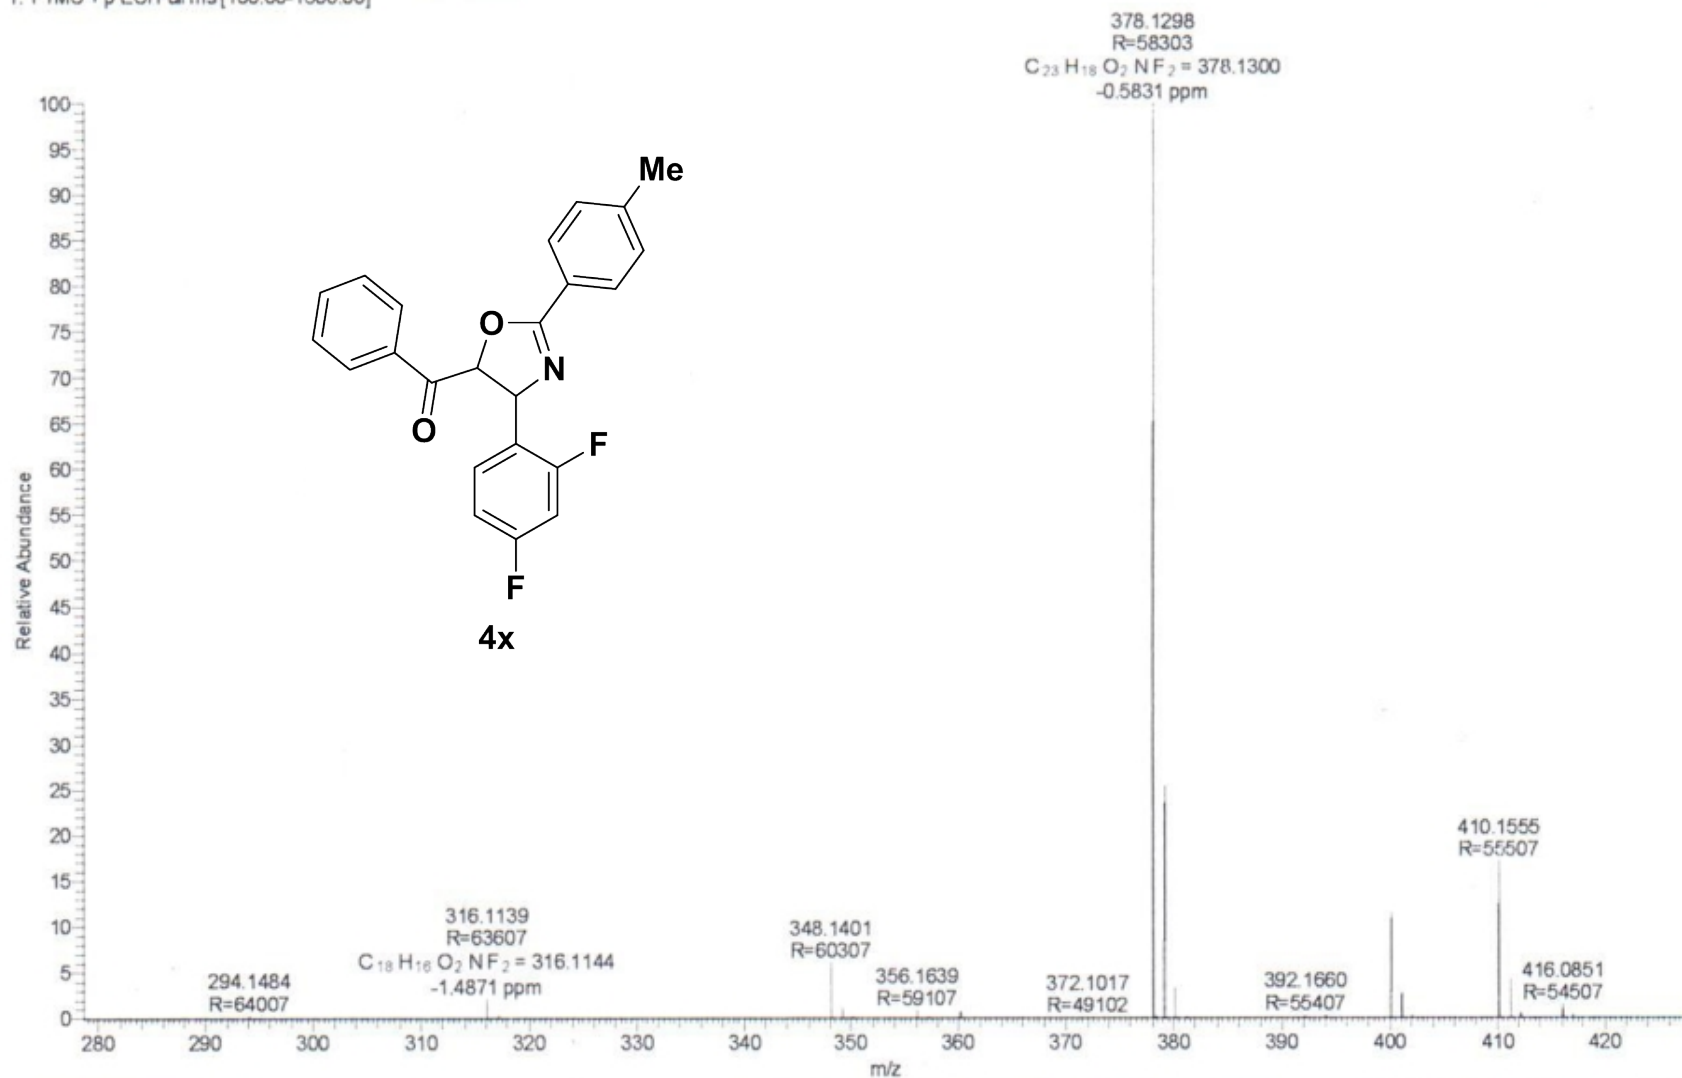



157- #157 RT: 0.70 AV: 1 NL: 4.05E9

T: FTM S + p ESI Full ms [100.00-1500.00]

390.1261  
R=57202  
C<sub>24</sub>H<sub>21</sub>O<sub>2</sub>Cl= 390.1255  
1.3713 ppm

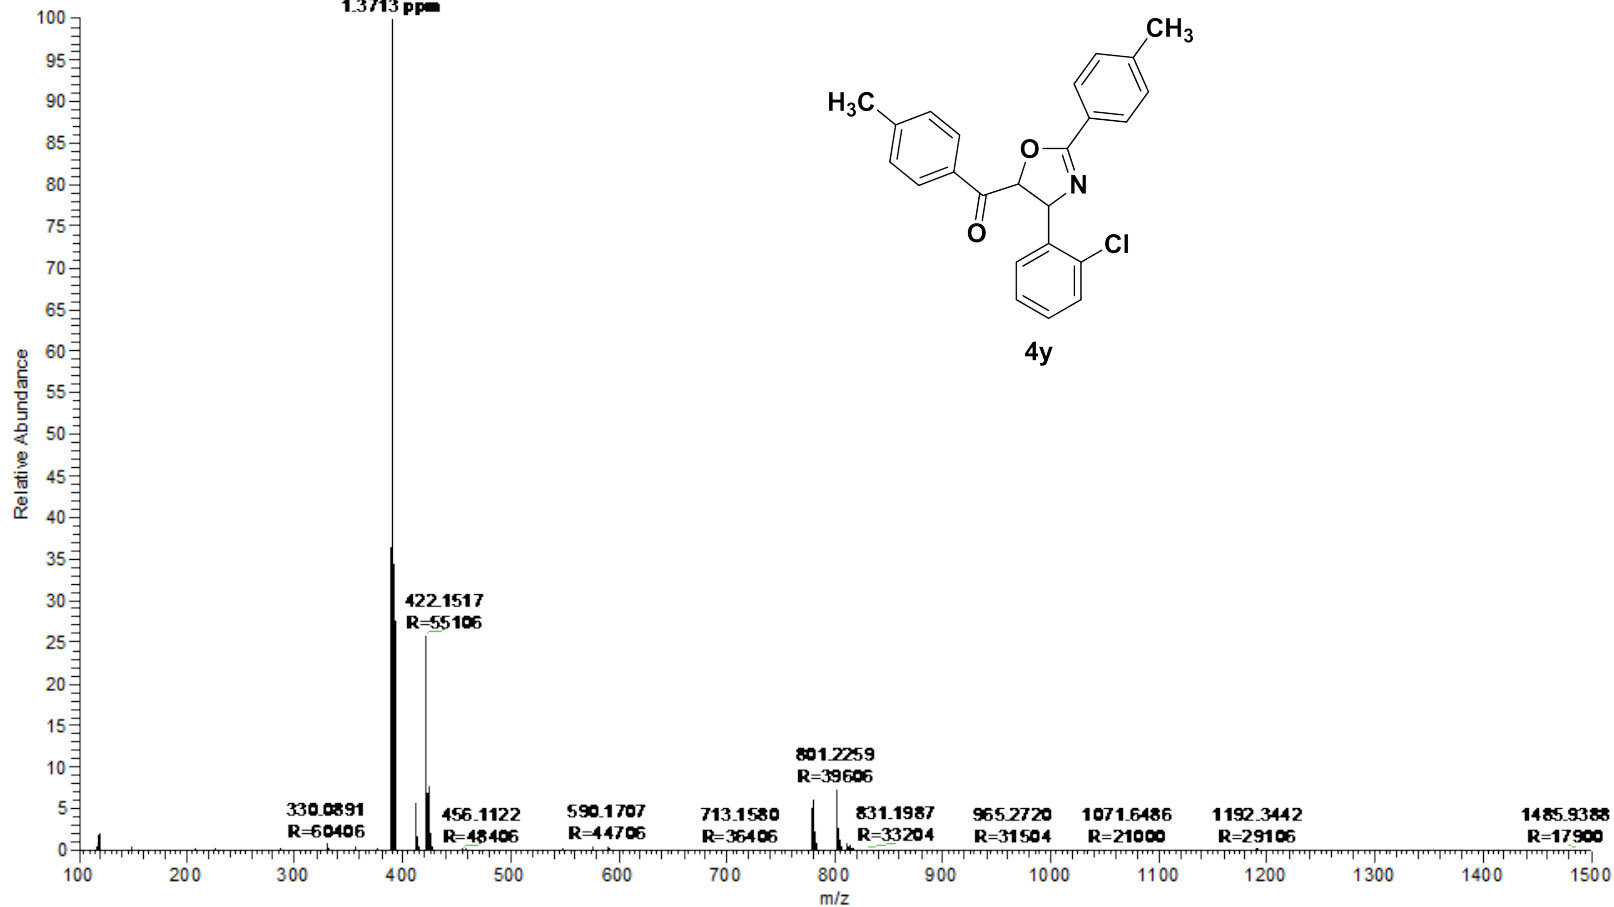

158-#168 RT: 0.75 AV: 1 NL: 1.51E9  
T: FTMS + p ESI Full ms [100.00-1500.00]

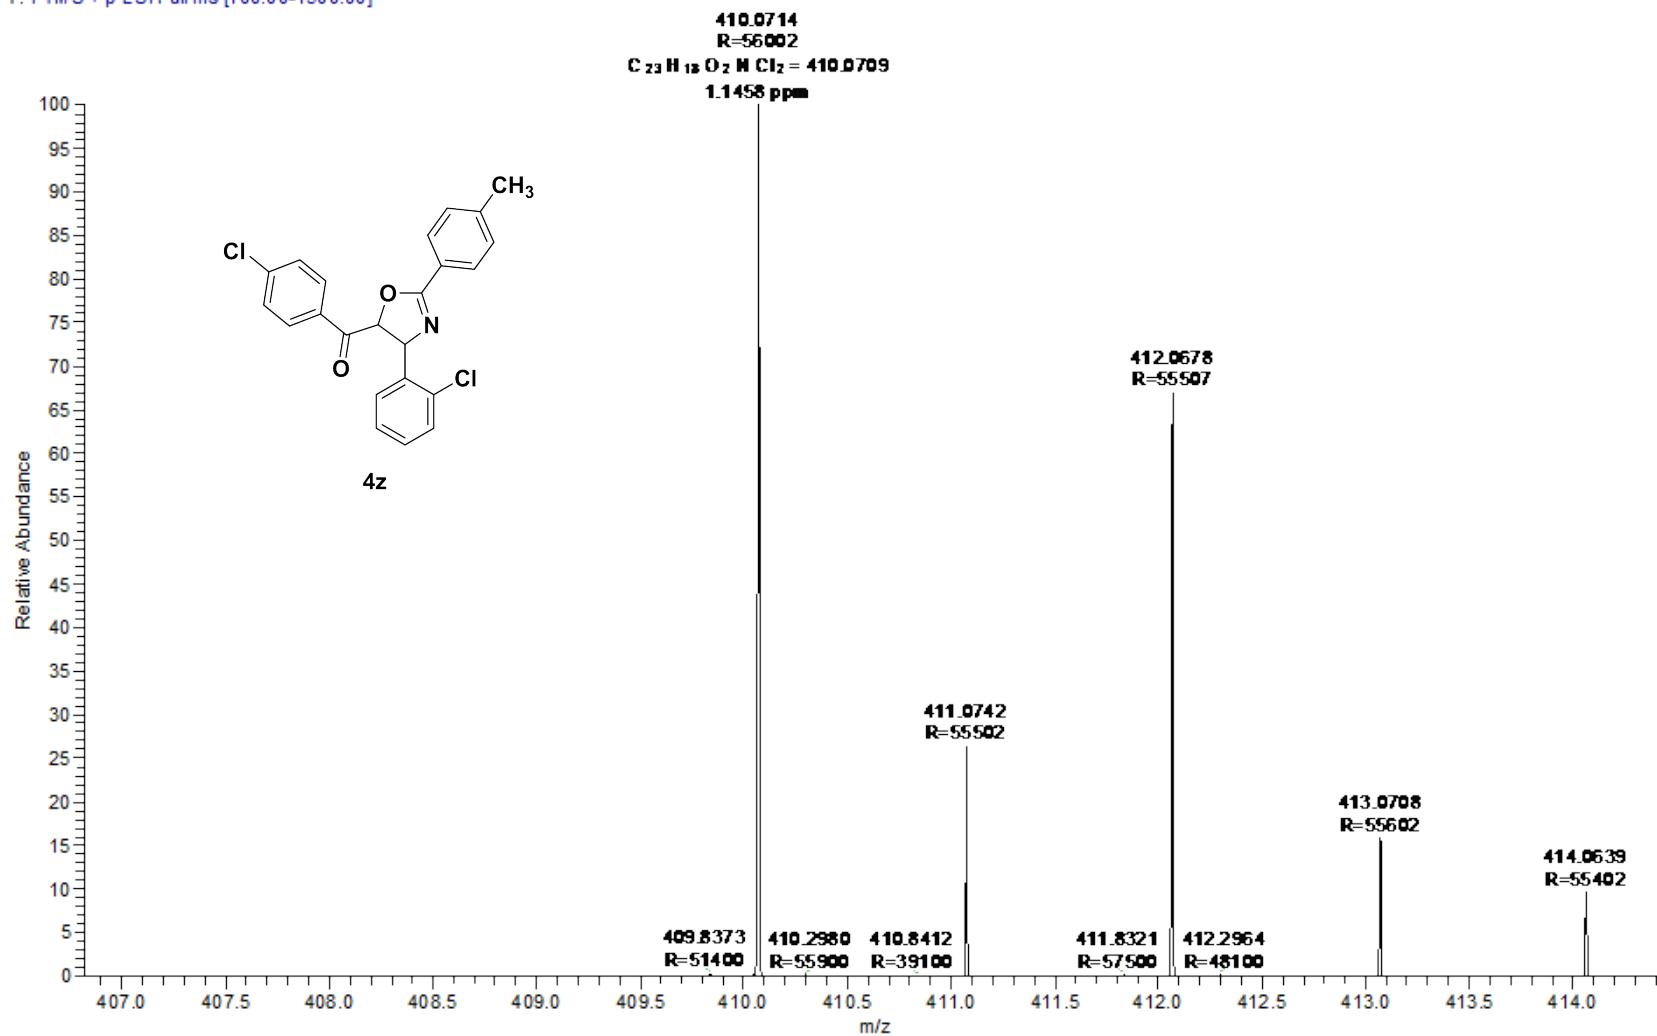

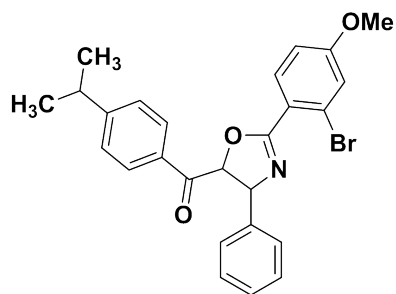

4za

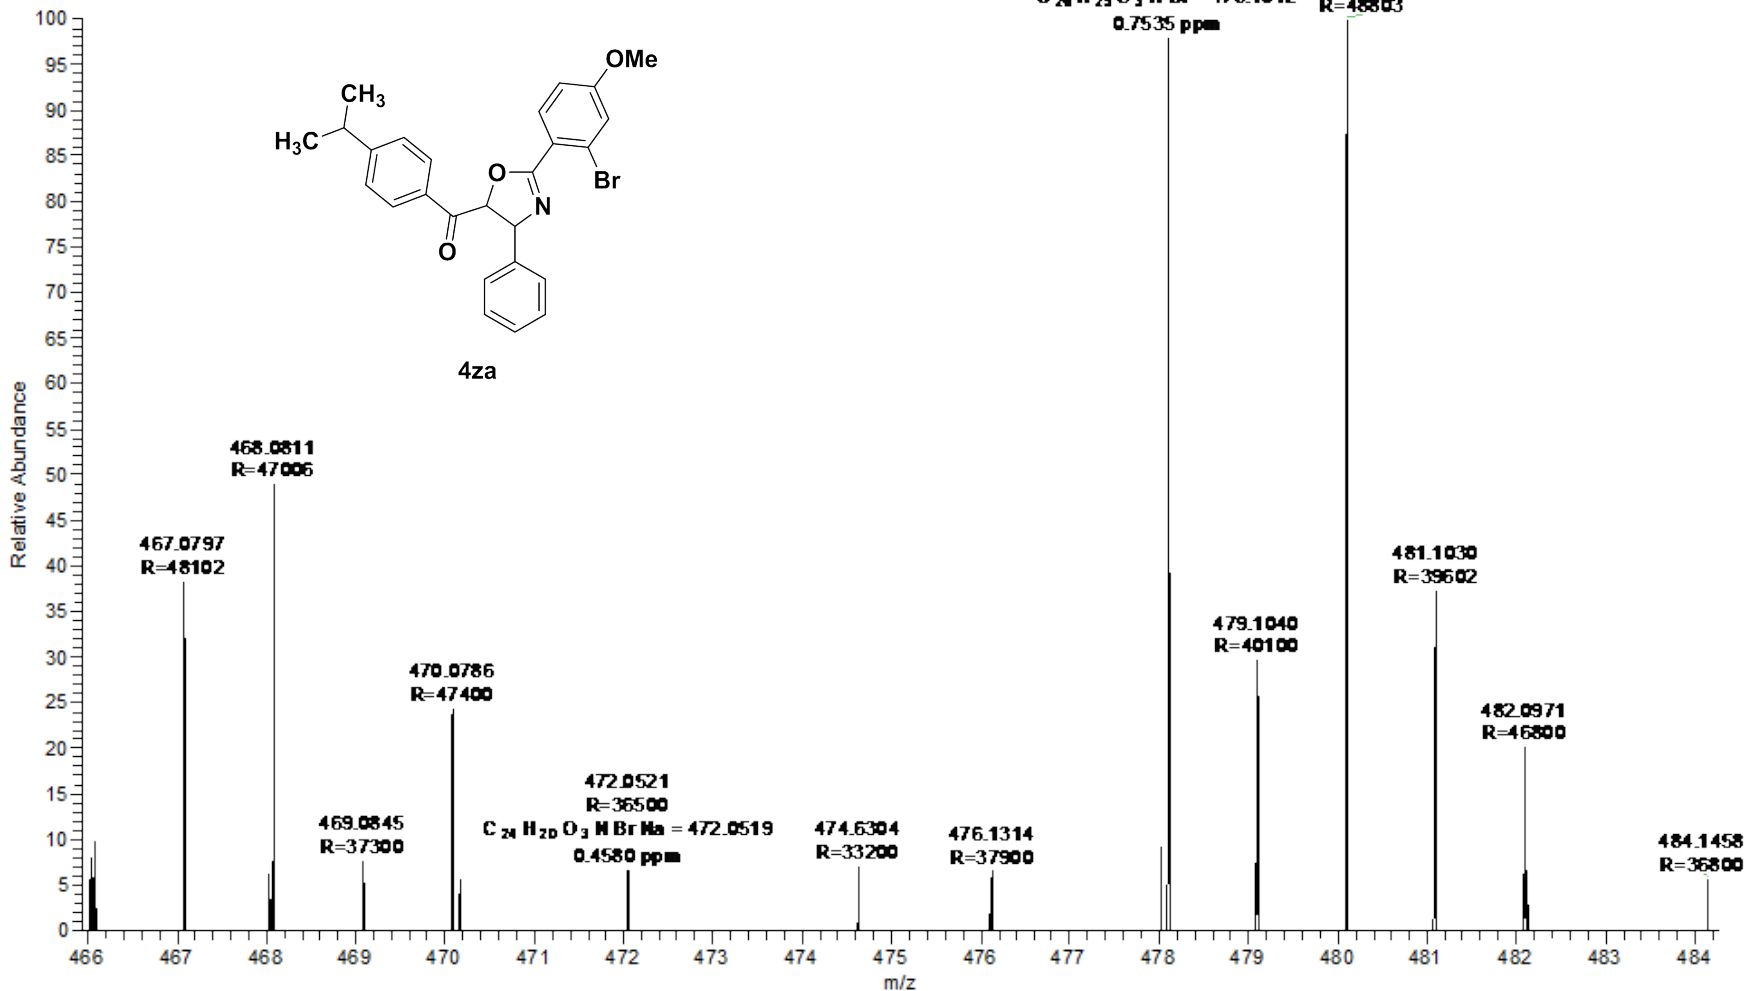

BP-104- #124 RT: 0.55 AV: 1 NL: 5.86E8  
T: FTMS + p ESI Full ms [100.00-1500.00]

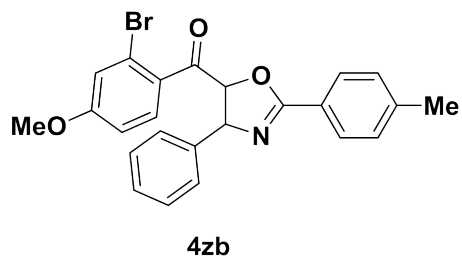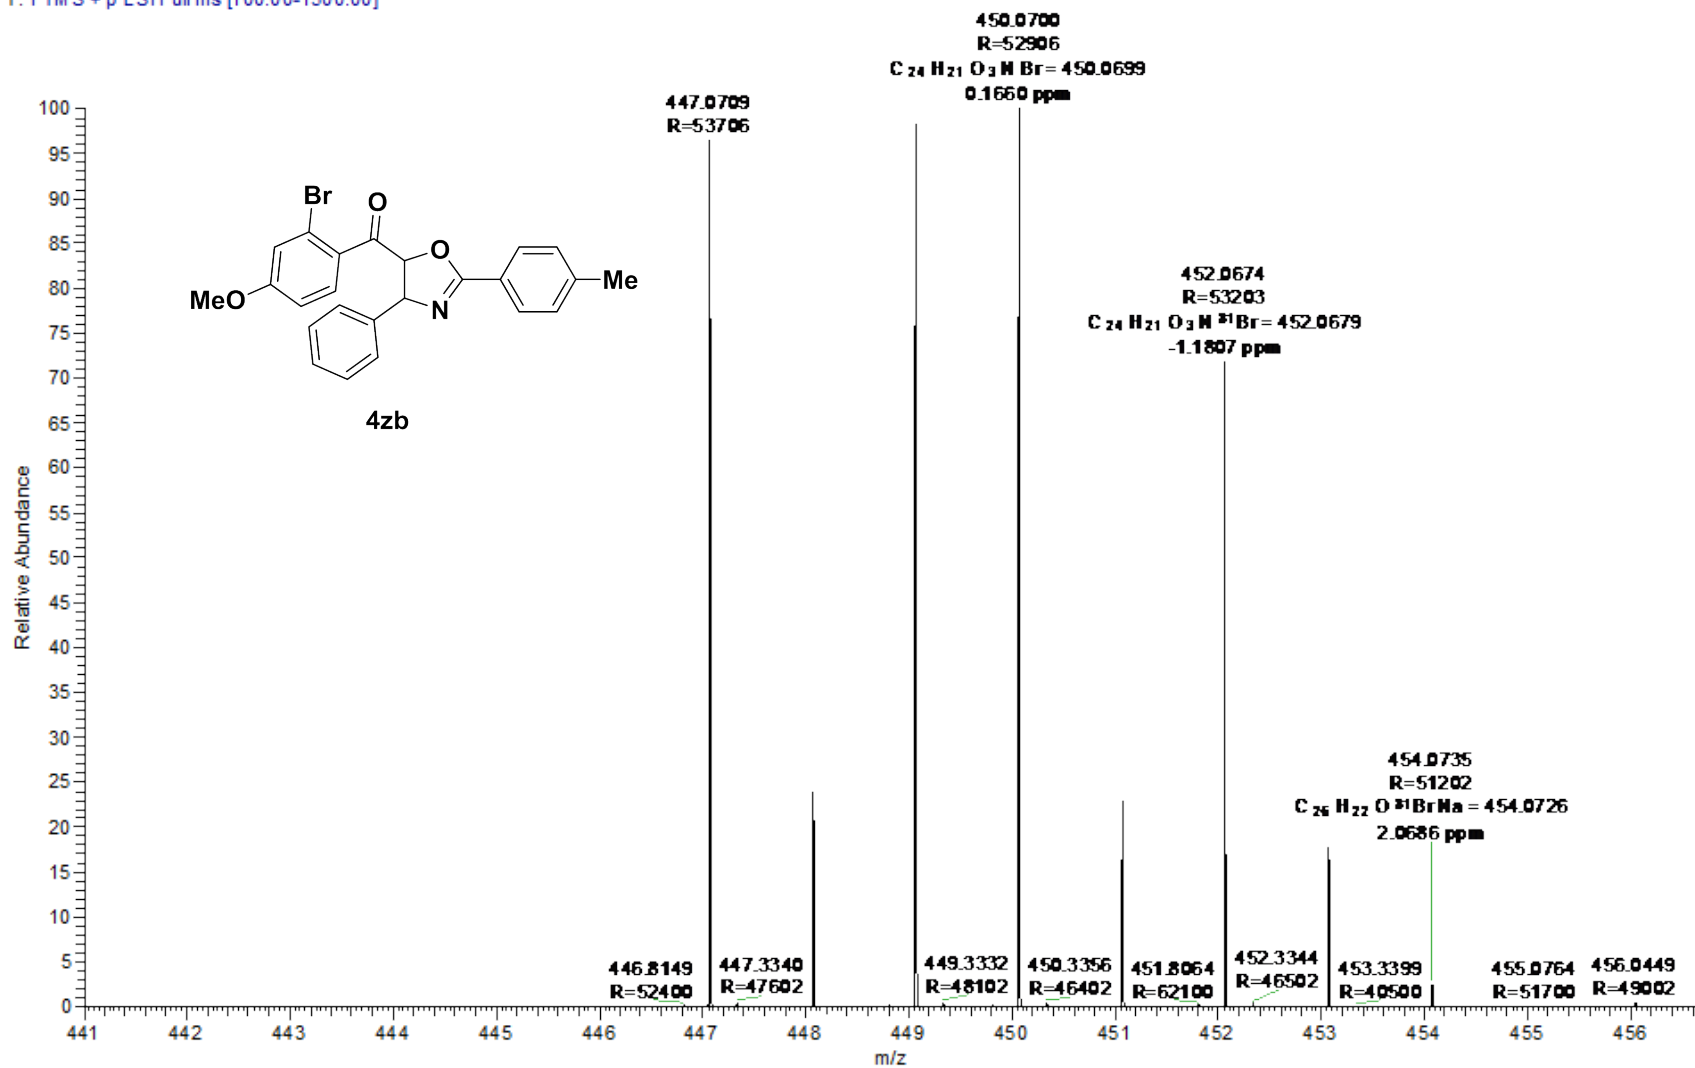

RBK-202 #117 RT: 0.52 AV: 1 NL: 6.15E 8

T: FTM S + p ESI Full ms [100.00-1500.00]

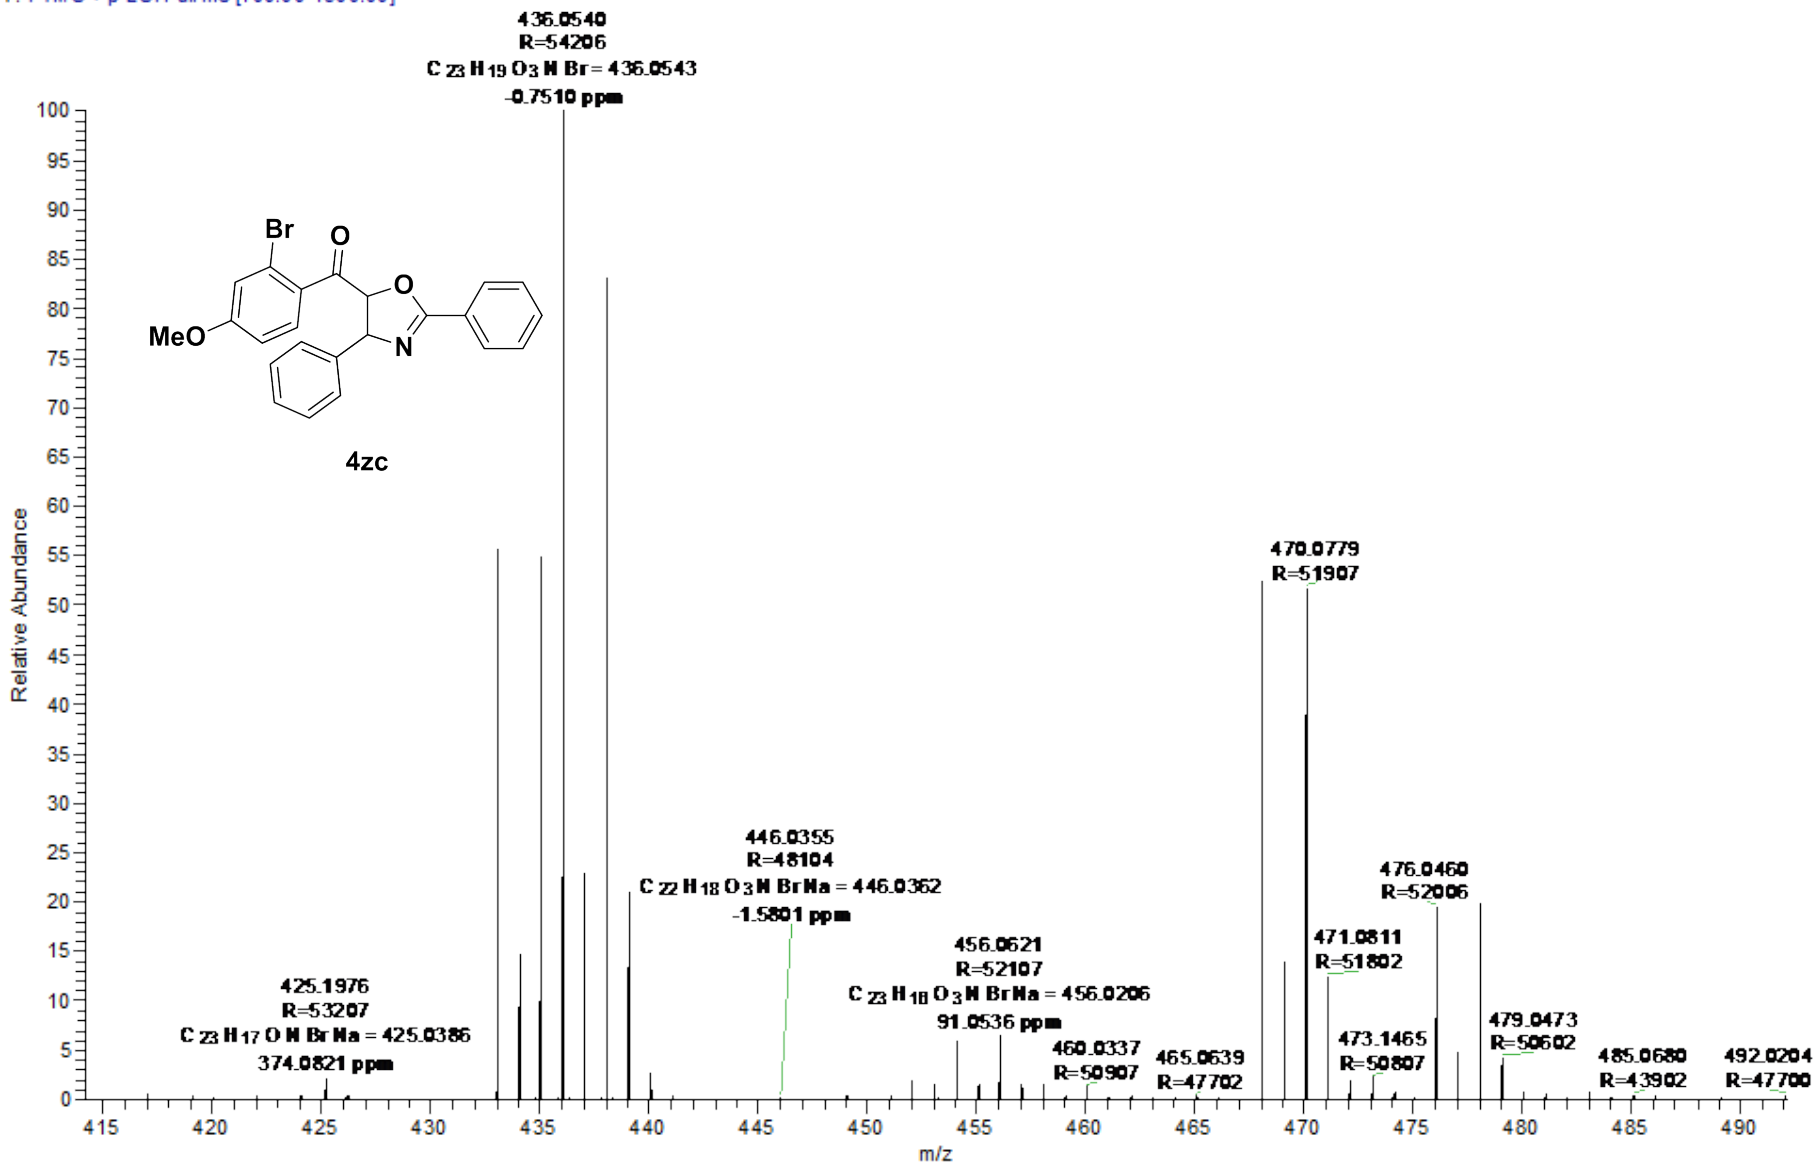

BP-111 #164 RT: 0.73 AV: 1 NL: 8.74E8  
T: FTMS + p ESI Full ms [100.00-1500.00]

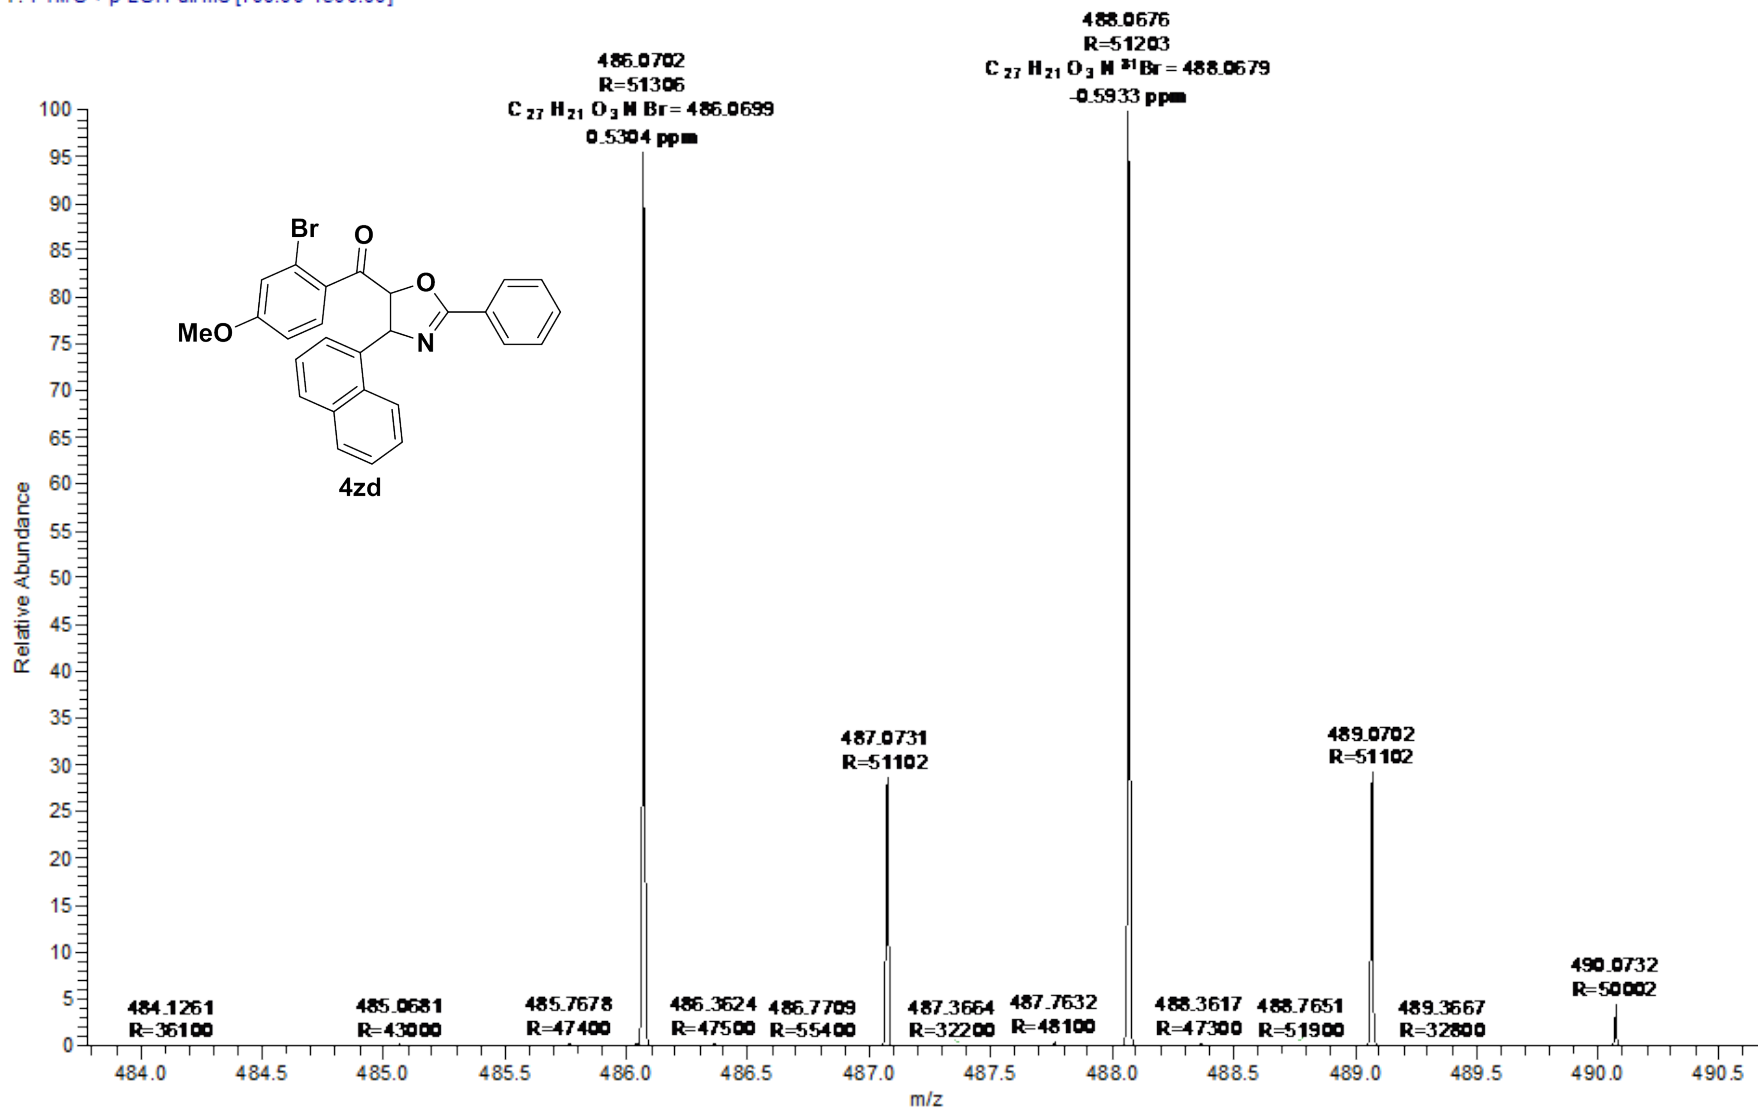

# MS Spectrum

\*MSD1 SPC, time=1.446.1.714 of D:\DATA\OCT-2017\RK-2.D MM-ES+APCI, Pos, Scan, Frag: 70

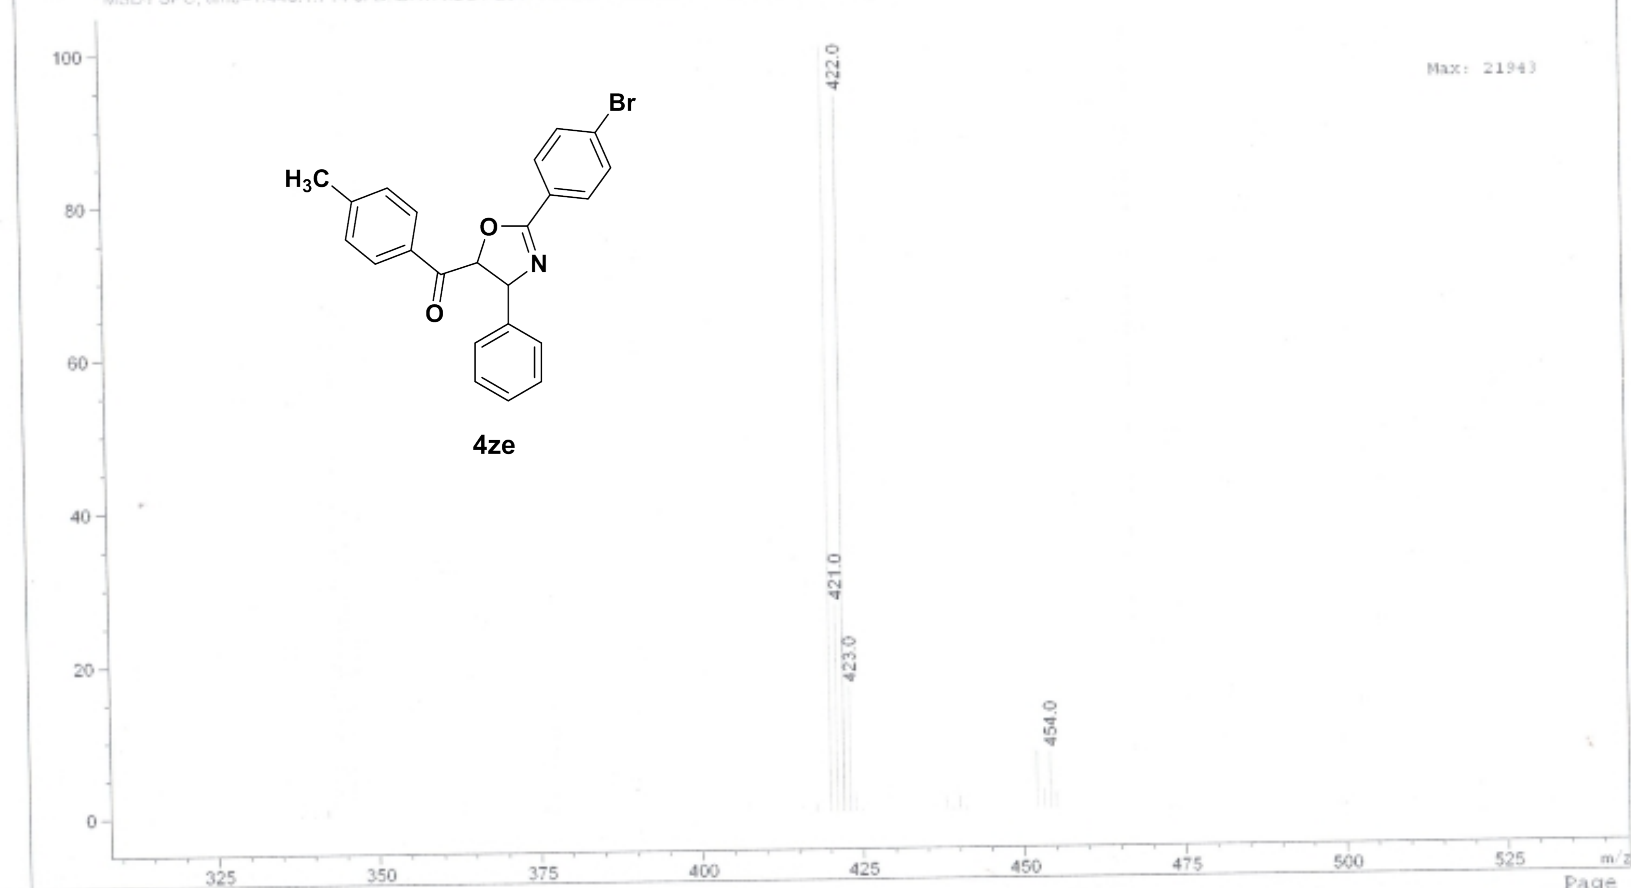

RBK-201 #140 RT: 0.62 AV: 1 NL: 9.58E8  
T: FTMS + p ESI Full ms [100.00-1500.00]

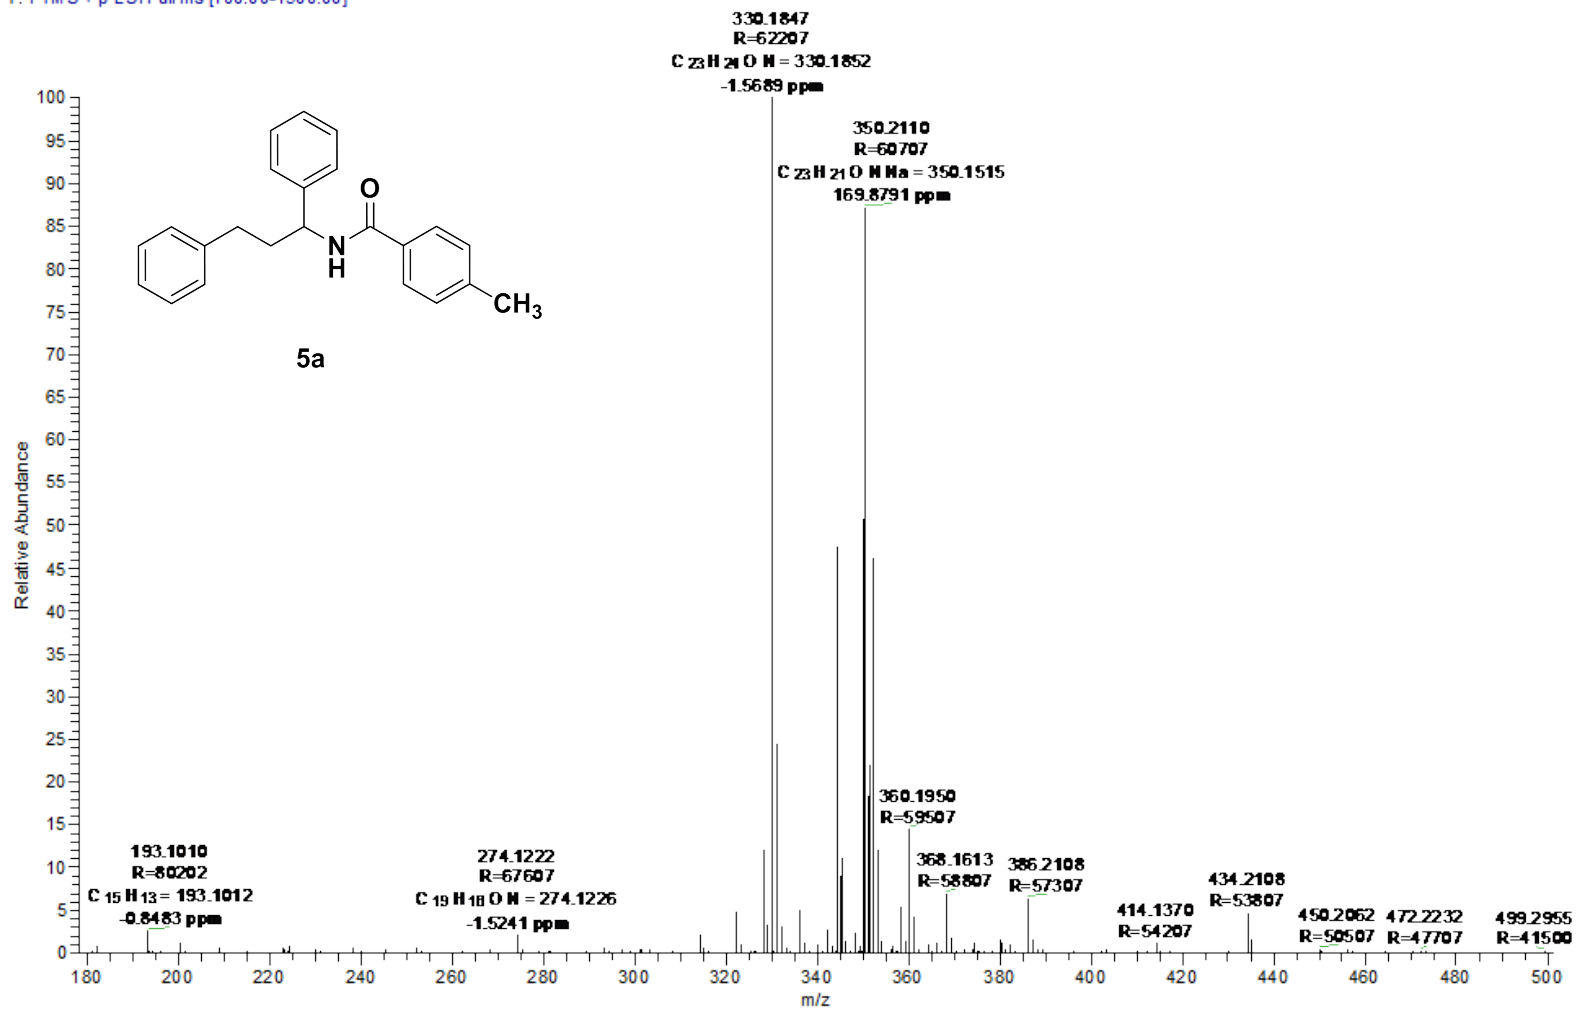



AZ-1 #199 RT: 0.88 AV: 1 NL: 1.92E9  
T: FTMS + p ESI Full ms [100.00-1500.00]

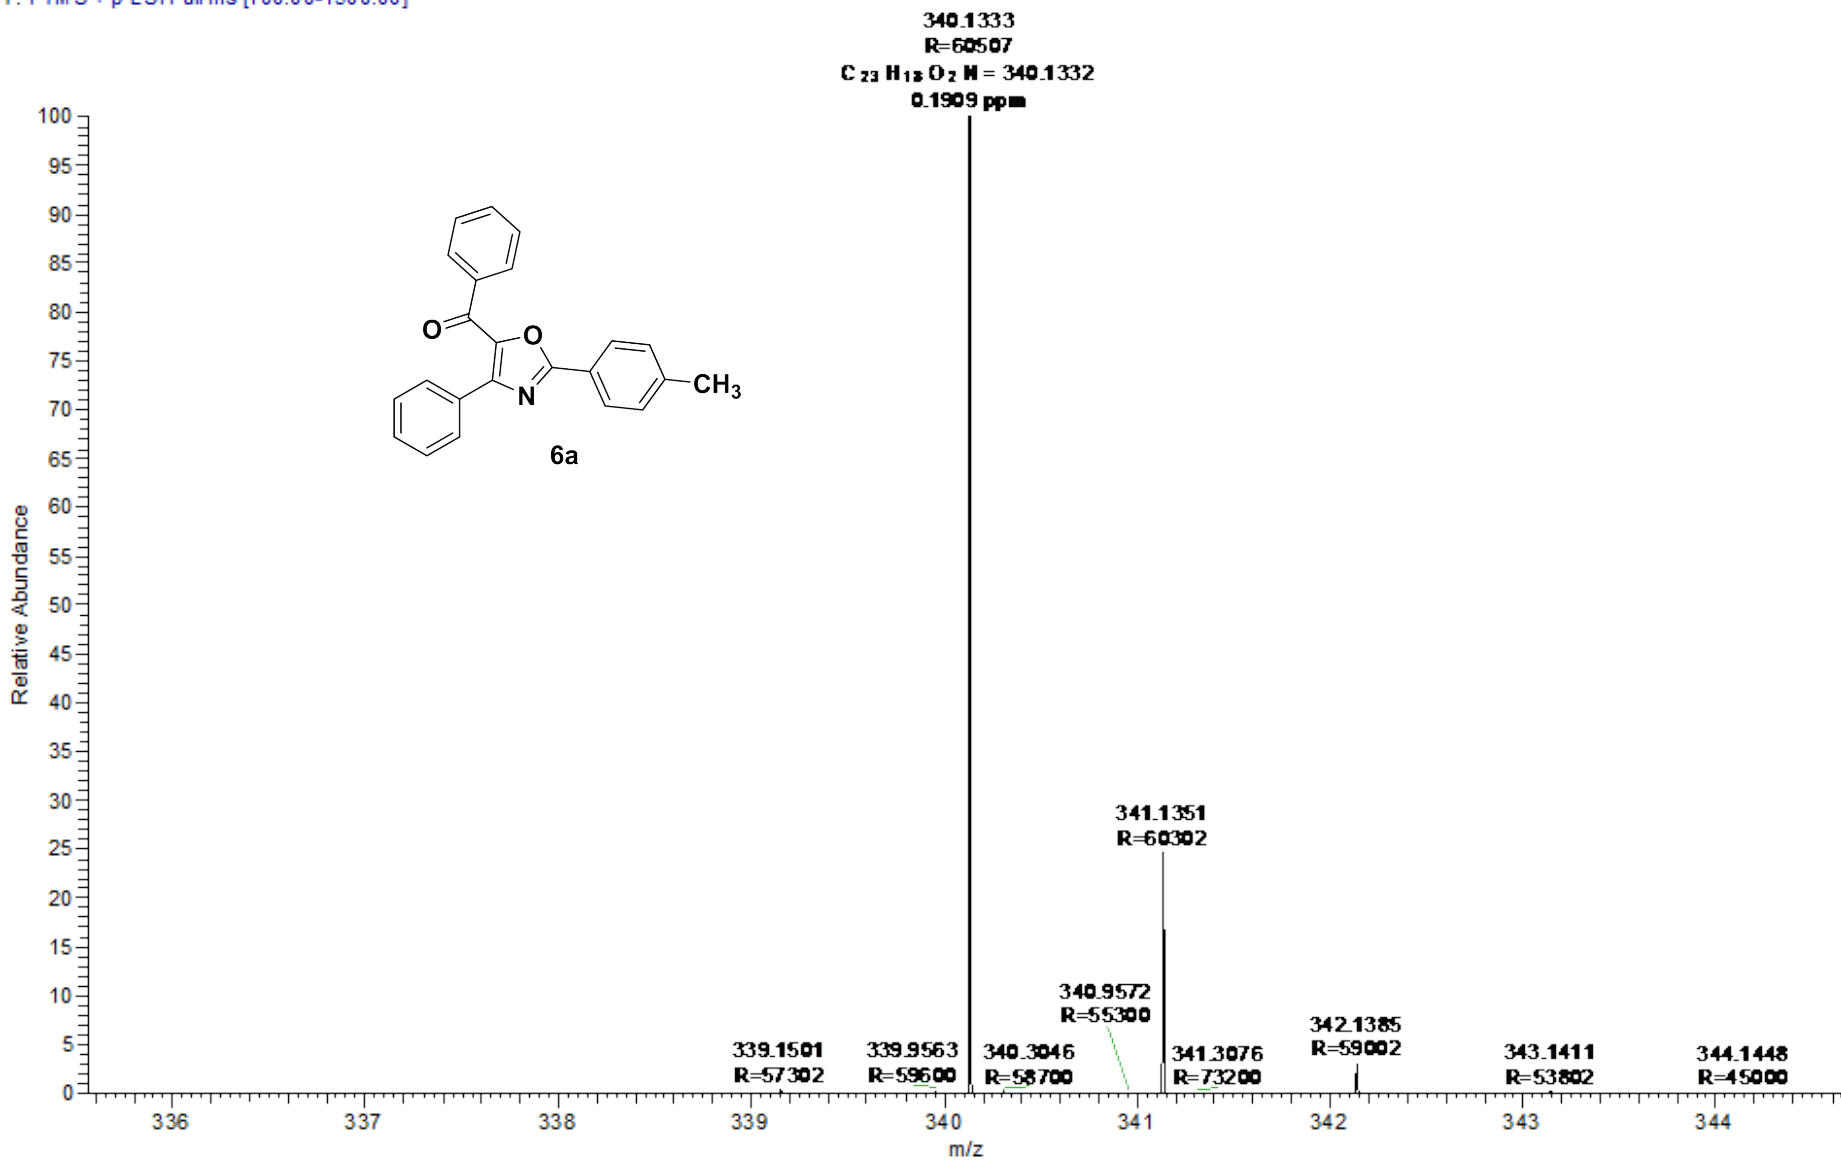

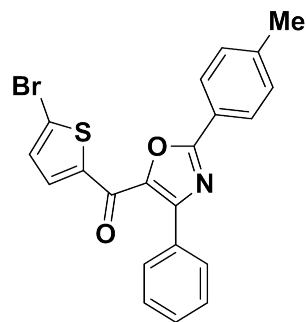

6b

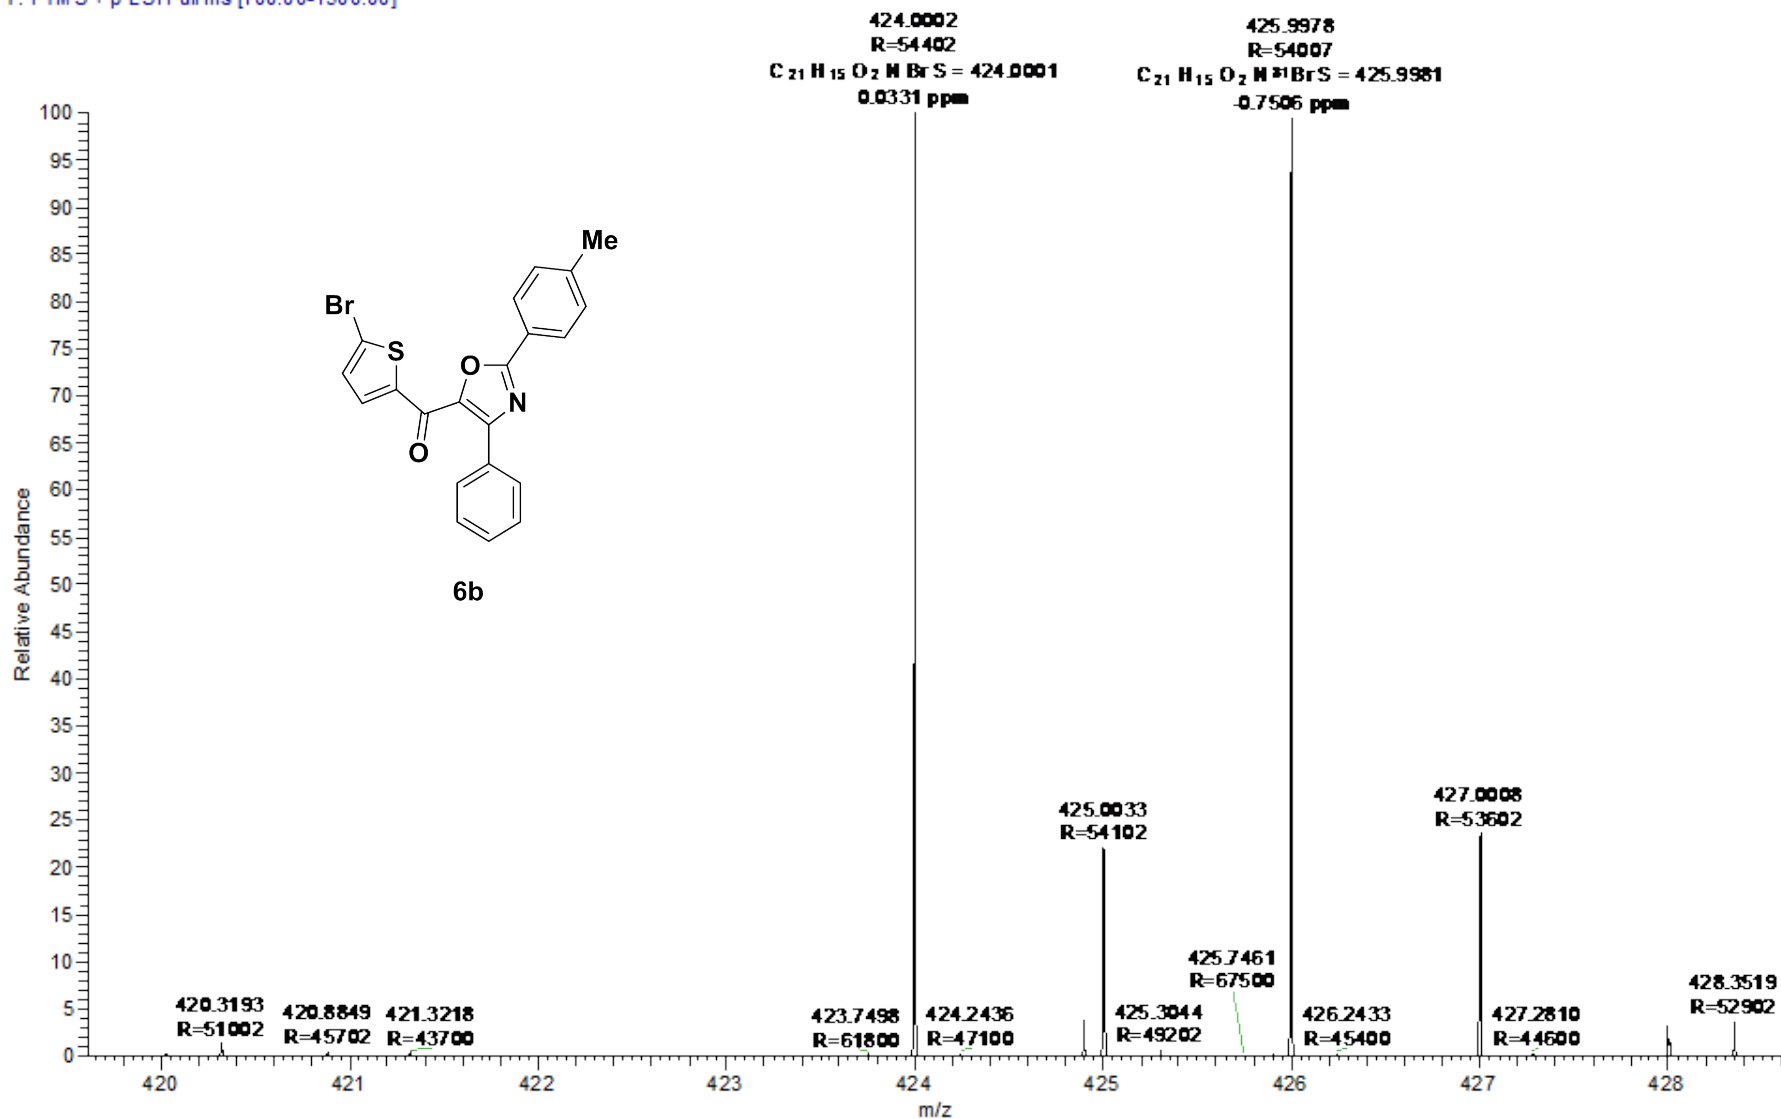

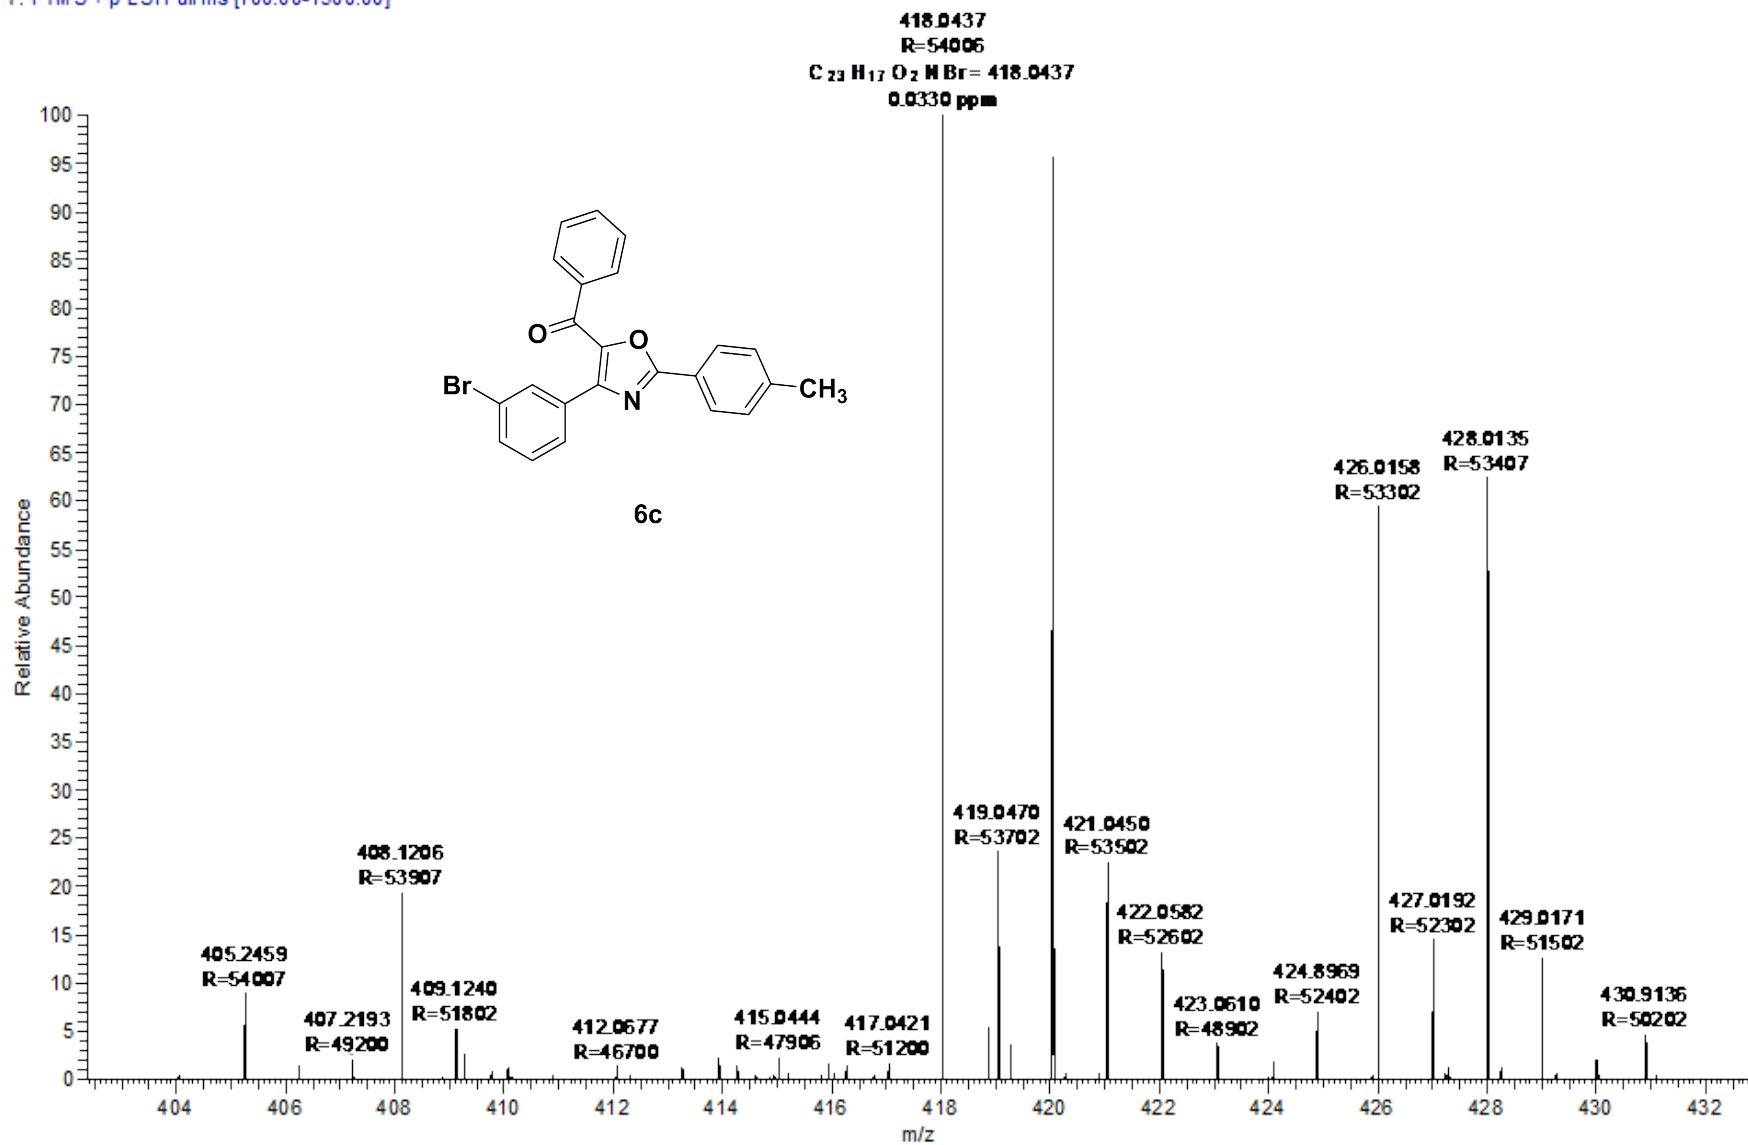

Supplement: c7qo00783c1.pdf [file c7qo00783c1.pdf]
