# Supplementary material for: Metal-free annulation of β-acylamino ketones: facile access to spirooxazolines and oxazolines via oxidative C–O bond formation
Source: Royal Society of Chemistry journal article supplement (doi:10.1039/c7qo00783c), 2017-10-16
Supplement: c7qo00783c2.pdf [file c7qo00783c2.pdf]

## **Electronic Supplementary Information (ESI)**

### **“Metal-Free Annulation of $\beta$ -Acylamino Ketones: Facile Access to Spirooxazolines and Oxazolines via Oxidative C-O Bond Formation”**

**Santosh S. Chavan,<sup>†</sup> Bapurao D. Rupanawar,<sup>†</sup> Rohit B. Kamble,<sup>†</sup> Anil M. Shelke<sup>†</sup> and Gurunath Suryavanshi<sup>†</sup> \***

*Chemical Engineering & Process Development Division, CSIR-National Chemical Laboratory,*

*Dr. Homi Bhabha Road, Pune, Maharashtra, India- 411008.*

\*Corresponding author: Tel.: +91 20 25902547; Fax: +91 20 25902676; e-mail:

[gm.suryavanshi@ncl.res.in](mailto:gm.suryavanshi@ncl.res.in)

#### **Table of Contents**

| <b>Sr. No.</b> | <b>Description</b>   | <b>Page No.</b> |
|----------------|----------------------|-----------------|
| 1              | General Information  | S2              |
| 2              | Optimization Study   | S2-S4           |
| 3              | Experimental Section | S4-S24          |
| 4              | NMR Spectra          | S25-S67         |

## 1. General Information

Solvents were purified and dried by standard procedures before use. Petroleum ether of boiling range 60–80 °C was used. Melting points are uncorrected. <sup>1</sup>H NMR and <sup>13</sup>C NMR spectra were recorded on AC-200, 400, 500 MHz NMR spectrometers. CDCl<sub>3</sub> was used as internal standard. HRMS data for all new compounds were recorded using Orbitrap mass analyzer associated with Accela 1250 pump. Purification was done using column chromatography (100-200 mesh). Unless otherwise specified, all reactions were carried out under nitrogen atmosphere in oven-dried round-bottom flasks. The reactions were monitored by TLC visualized by UV (254 nm) and/or with iodine. Coupling constants are given in hertz (Hz) and the classical abbreviations are used to describe the signal multiplicities. All chemicals are purchased from Sigma-Aldrich and used without further purification.

## 2. Optimization of Reaction Conditions

We started our investigation by taking  $\beta$ -acylamino ketone **1a** as a model substrate to determine the optimal reaction conditions for the cyclization reaction sequence to form **2a**. Several experiments were performed to investigate the effect of oxidant, additive and solvent on the reaction. As highlighted in Table 1, the choice of oxidant, additive as well as solvent had a great influence on the reaction. Initially, treatment of  $\beta$ -acylamino ketone **1a** with 2.0 equiv of PhI(OAc)<sub>2</sub> and TFAA in dry 1,2-dichloroethane, delivered 68% of the desired spirooxazoline product **2a** (Table 1, entry 1). While decreasing the loading of amount of additive, the desired product **2a** was isolated in lower yield (Table 1, entry 2 & 3). Subsequently, the effect of amount of oxidant was also investigated (Table 1, entry 4 & 5). Reducing the oxidant loading from 2 to 1.5 equiv slightly decreased the efficiency of the spirooxazoline product (Table 1, entry 5). Next, we examined the influence of various additives on the cyclization reaction (Table 1, entries 6-10). Notably, the BF<sub>3</sub>·OEt<sub>2</sub> as an additive was found to be more effective and furnished the titled compound **2a** in 81% yield

(Table 1, entry 8). After screening of oxidant and additives we moved our attention to find out compatible solvent for the intramolecular cyclization reaction leading to the synthesis of spirooxazoline product **2a**. A series of solvents were tested (Table 1, entries 11-18). Unfortunately, the use of solvents such as Et<sub>2</sub>O, MeOH, MeCN and CCl<sub>4</sub> didn't lead to the formation of desired compound **2a** (Table 1, entries 13-16). Gratifyingly, 88% yield of **2a** was obtained in CH<sub>2</sub>Cl<sub>2</sub> as a solvent (Table 1, entry 17). Solvent switching from CH<sub>2</sub>Cl<sub>2</sub> to ethyl acetate resulted in the lower yield of final compound **2a**.

**Table 1** Optimization of reaction conditions for the synthesis spirooxazoline *via* iodine (III)-mediated annulation of  $\beta$ -amidoketones <sup>a, b</sup>

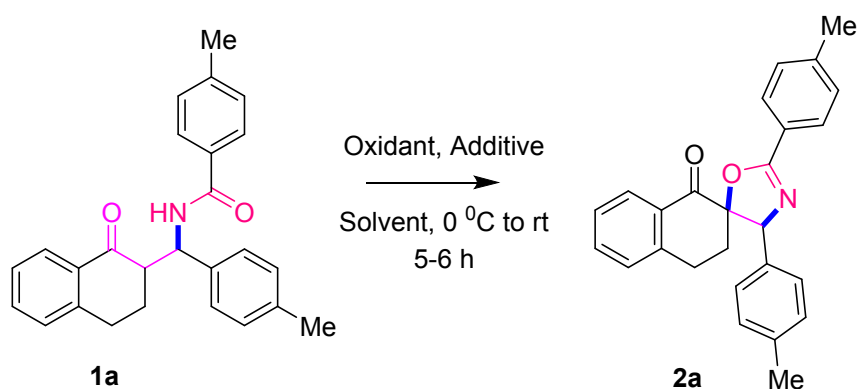

| Entry     | Oxidant (equiv) | Additive (equiv)                                        | Solvent                             | Yield (%) <sup>b</sup> |
|-----------|-----------------|---------------------------------------------------------|-------------------------------------|------------------------|
| 1         | PIFA (2)        | TFAA (0.5)                                              | DCE                                 | 68                     |
| 2         | PIFA (1.5)      | TFAA (0.5)                                              | DCE                                 | 53                     |
| 3         | PIFA (2)        | TFAA (0.2)                                              | DCE                                 | 47                     |
| 4         | PIDA (2)        | TFAA (0.5)                                              | DCE                                 | 72                     |
| 5         | PIDA (1.5)      | TFAA (0.5)                                              | DCE                                 | 60                     |
| 6         | PIDA (2)        | (CF <sub>3</sub> SO <sub>2</sub> ) <sub>2</sub> O (0.5) | DCE                                 | 74                     |
| 7         | PIDA (2)        | BF <sub>3</sub> .Et <sub>2</sub> O (0.5)                | DCE                                 | 81                     |
| 8         | PIDA (2)        | TFA (0.5)                                               | DCE                                 | 60                     |
| 9         | PIDA (2)        | PTSA (0.5)                                              | DCE                                 | 40                     |
| 10        | PIDA (2)        | TfOH (0.5)                                              | DCE                                 | n.d                    |
| 11        | PIDA (2)        | BF <sub>3</sub> .Et <sub>2</sub> O (0.5)                | PhH                                 | 23                     |
| 12        | PIDA (2)        | BF <sub>3</sub> .Et <sub>2</sub> O (0.5)                | PhMe                                | 16                     |
| 13        | PIDA (2)        | BF <sub>3</sub> .Et <sub>2</sub> O (0.5)                | Et <sub>2</sub> O                   | n.d                    |
| 14        | PIDA (2)        | BF <sub>3</sub> .Et <sub>2</sub> O (0.5)                | MeOH                                | n.d                    |
| 15        | PIDA (2)        | BF <sub>3</sub> .Et <sub>2</sub> O (0.5)                | MeCN                                | n.d                    |
| 16        | PIDA (2)        | BF <sub>3</sub> .Et <sub>2</sub> O (0.5)                | CCl <sub>4</sub>                    | n.d                    |
| <b>17</b> | <b>PIDA (2)</b> | <b>BF<sub>3</sub>.Et<sub>2</sub>O (0.25)</b>            | <b>CH<sub>2</sub>Cl<sub>2</sub></b> | <b>88</b>              |

|                                                                                                                                            |          |                                          |       |    |
|--------------------------------------------------------------------------------------------------------------------------------------------|----------|------------------------------------------|-------|----|
| 18                                                                                                                                         | PIDA (2) | BF <sub>3</sub> .Et <sub>2</sub> O (0.5) | EtOAc | 70 |
| <sup>a</sup> Substrate <b>1a</b> (1.0 mmol), solvent (5 mL), 5-6 h. <sup>b</sup> Isolated yield after column chromatographic purification. |          |                                          |       |    |

After examining a series of oxidants, additives and solvents, PIDA (2.0 equiv) as the oxidant, BF<sub>3</sub>.Et<sub>2</sub>O (0.25 equiv) as an additive and CH<sub>2</sub>Cl<sub>2</sub> as the solvent was selected as the best reaction condition for the cyclization reaction, resulting in the 88% yield of **2a** (Table 1, entry 17). Attempts to decrease the amount of both oxidant and additive resulted in much lower yields of desired product **2a**.

### 3.0 Experimental Section

#### 3.1 General procedure for the synthesis of spirooxazolines (examples 2a-2h):

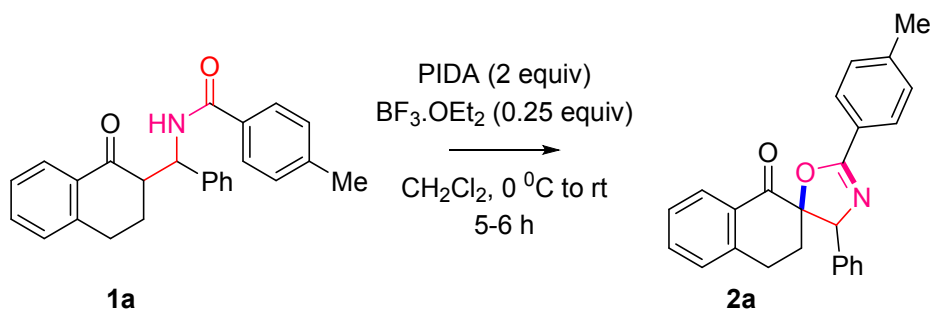

To a well-stirred solution of  $\beta$ -acylamino ketone **1a** (461 mg, 1.0 mmol) and PIDA (644 mg, 2.0 mmol) in dry CH<sub>2</sub>Cl<sub>2</sub> (10 mL) was added BF<sub>3</sub>.Et<sub>2</sub>O (0.030 mL, 0.25 mmol) at 0 °C. The reaction mixture was then stirred at room temperature until the completion of the reaction as indicated by TLC. The resulting mixture was poured into saturated aqueous NaCl (100 mL), neutralized with saturated aqueous NaHCO<sub>3</sub>, and extracted with CH<sub>2</sub>Cl<sub>2</sub> (3×20 mL). The combined organic phase was washed with water, dried over anhydrous Na<sub>2</sub>SO<sub>4</sub>, filtered, and evaporated in vacuo. The crude product was purified by flash chromatography (silica gel, petroleum ether/ethyl acetate = 80/20) to give **2a** as a yellow oil (403 mg, 88%).

### 3.2 General procedure for the synthesis of oxazolines (examples 4a-4ze):

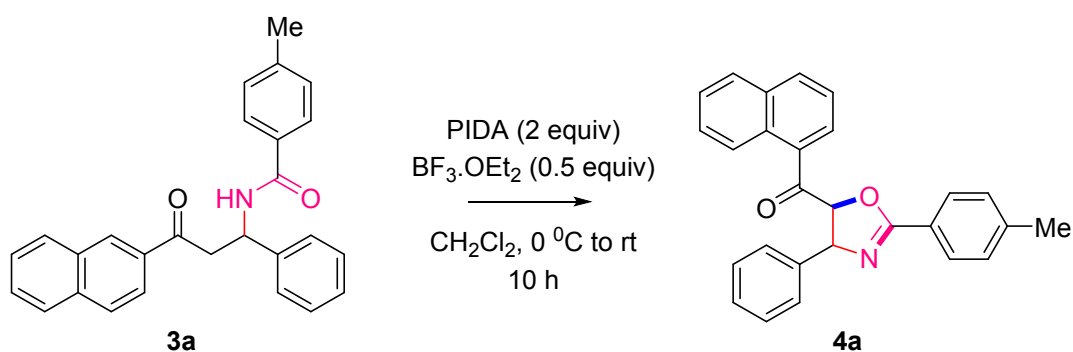

To a well-stirred solution of  $\beta$ -acylamino ketone **3a** (393 mg, 1.0 mmol) and PIDA (644 mg, 2.0 mmol) in dry  $\text{CH}_2\text{Cl}_2$  (10 mL) was added  $\text{BF}_3 \cdot \text{Et}_2\text{O}$  (0.060 mL, 0.5 mmol) at 0 °C. The reaction mixture was then stirred at room temperature until the completion of the reaction as indicated by TLC. The resulting mixture was poured into saturated aqueous NaCl (100 mL), neutralized with saturated aqueous  $\text{NaHCO}_3$  and extracted with  $\text{CH}_2\text{Cl}_2$  (3 $\times$ 20 mL). The combined organic phase was washed with water, dried over anhydrous  $\text{Na}_2\text{SO}_4$ , filtered, and evaporated in vacuo. The crude product was purified by flash chromatography (silica gel, petroleum ether/ethyl acetate = 80/20) to give **4a** as a white solid (289 mg, 74%).

### 3.3 Transformation of Product 4c into 5a:

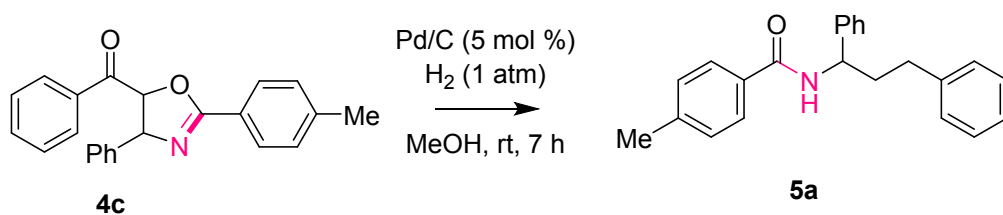

**Procedure:** Degassed methanol (4.0 ml) was added to the mixture of Pd/C (10 wt %) and oxazoline **4c** (1.0 mmol, 314 mg). After stirring under 1 atm pressure of hydrogen for 7 h at room temperature, the reaction mixture was filtered, and then evaporated under reduced pressure. The crude product was then purified by flash column chromatography to give hydrogenated product **5a** as a white solid (286 mg, 95%).

### 3.4 General procedure for the synthesis of oxazoles from oxazolines (examples 6a-6c):

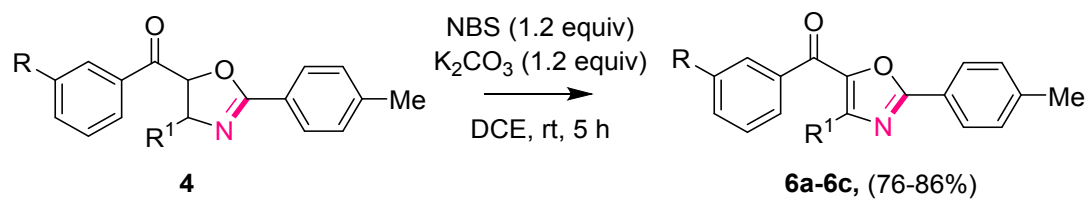

To a well-stirred solution of Oxazolines **4** (1.0 mmol) in dichloroethane (10 mL) was added NBS (1.2 mmol) and K<sub>2</sub>CO<sub>3</sub> (1.2 mmol) at room temperature. The reaction mixture was then stirred at room temperature until the completion of the reaction as indicated by TLC. The mixture was then treated with saturated Na<sub>2</sub>S<sub>2</sub>O<sub>3</sub> (3×20 mL) and extracted with dichloromethane (3×20 mL) and then evaporated under reduced pressure. The combined organic phase was washed with water, dried over anhydrous Na<sub>2</sub>SO<sub>4</sub>, filtered, and evaporated in vacuo. The crude product was then purified by flash chromatography (silica gel, petroleum ether/ethyl acetate = 9:1) to give oxazoles **6a-6c** as a White solid.

**2',4'-di-p-tolyl-3,4-dihydro-1H,4'H-spiro[naphthalene-2,5'-oxazol]-1-one (2a)**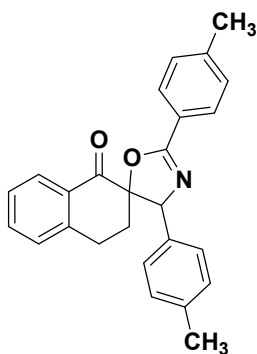

**Rf:** 0.33 (Pet. ether/EtOAc = 80/20); **Yield:** 79 mg, 88%; Yellow oil; **<sup>1</sup>H NMR** (500 MHz, CDCl<sub>3</sub>)  $\delta$ : 8.19 (1H, d,  $J$  = 7.6 Hz), 7.97 (2H, d,  $J$  = 8.0 Hz), 7.49 - 7.60 (1H, m), 7.38 - 7.43 (1H, m), 7.25 (2H, br. s.), 7.16 (5H, s), 5.98 (1H, s), 3.11 - 3.16 (1H, m), 2.71 (1H, dt,  $J$  = 17.0, 5.2 Hz), 2.44 (3H, s), 2.38 (3H, s), 2.13 - 2.18 (1H, m), 1.79 (1H, td,  $J$  = 9.3, 4.6 Hz); **<sup>13</sup>C NMR** (101 MHz, CDCl<sub>3</sub>)  $\delta$ : 192.7, 162.5, 143.7, 142.0, 137.5, 134.7, 134.1, 130.9, 129.0, 128.7, 128.7, 128.5, 127.9, 126.9, 124.6, 87.2, 72.6, 30.1, 25.4, 21.6, 21.1; **HRMS** (ESI) calculated [M+H]<sup>+</sup> for C<sub>26</sub>H<sub>24</sub>O<sub>2</sub>N: 382.1805, found: 382.1802.

**4'-(o-tolyl)-2'-(p-tolyl)-3,4-dihydro-1H,4'H-spiro[naphthalene-2,5'-oxazol]-1-one (2b)**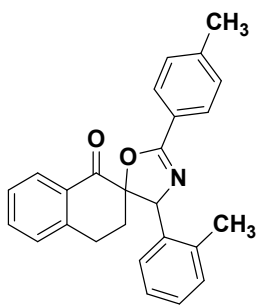

**Rf:** 0.29 (Pet. ether/EtOAc = 80/20); **Yield:** 81 mg, 82%; Yellow oil; **<sup>1</sup>H NMR** (500 MHz, CDCl<sub>3</sub>)  $\delta$ : 7.51-7.57 (1H, m), 7.39 (1H, t,  $J$  = 7.4 Hz), 7.29-7.34 (1H, m), 7.16-7.26 (6H, m), 7.12 (1H, d,  $J$  = 6.9 Hz), 6.34 (1H, s), 3.14-3.28 (1H, m), 2.67 (1H, dt,  $J$  = 17.2, 4.6 Hz), 2.41 (3H, s), 2.13 (3H, s), 2.01 (1H, dt,  $J$  = 14.5, 4.6 Hz), 1.59 (1H, ddd,  $J$  = 14.7, 10.1, 5.0 Hz); **<sup>13</sup>C NMR** (100 MHz, CDCl<sub>3</sub>)  $\delta$ : 192.3, 161.9, 143.9, 141.9, 136.6, 135.6, 134.2, 130.8, 130.2, 129.0, 128.9, 128.7, 128.4, 128.2, 127.6, 127.1, 126.0, 124.5, 86.4, 69.5, 30.7, 25.4, 21.6, 19.9; **HRMS** (ESI) calculated [M+H]<sup>+</sup> for C<sub>26</sub>H<sub>24</sub>O<sub>2</sub>N: 382.1802, found: 382.1786.

**2'-phenyl-4'-(p-tolyl)-3,4-dihydro-1H,4'H-spiro[naphthalene-2,5'-oxazol]-1-one (2c)**

**Rf:** 0.35 (Pet. ether/EtOAc = 80/20); **Yield:** 78 mg, 79%;

|                                                                                     |                                                                                                                                                                                                                                                                                                                                                                                                                                                                                                                                                                                                                                                                                                                                                                                                                                                                                                                                 |
|-------------------------------------------------------------------------------------|---------------------------------------------------------------------------------------------------------------------------------------------------------------------------------------------------------------------------------------------------------------------------------------------------------------------------------------------------------------------------------------------------------------------------------------------------------------------------------------------------------------------------------------------------------------------------------------------------------------------------------------------------------------------------------------------------------------------------------------------------------------------------------------------------------------------------------------------------------------------------------------------------------------------------------|
| 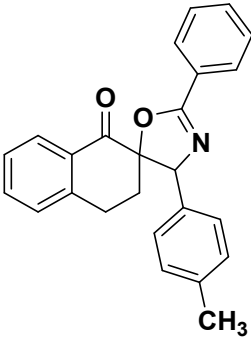   | <p>Colorless oil; <math>^1\text{H NMR}</math> (500 MHz, <math>\text{CDCl}_3</math>) <math>\delta</math>: 8.16 (1H, d, <math>J = 7.25</math> Hz), 8.05 (2H, d, <math>J = 7.25</math> Hz), 7.50 - 7.56 (2H, m), 7.43 (2H, t, <math>J = 7.63</math> Hz), 7.37 - 7.40 (1H, m), 7.23 (1H, d, <math>J = 7.63</math> Hz), 7.14 (4H, s), 5.97 (1H, s), 3.12 (1H, td, <math>J = 8.58, 3.81</math> Hz), 2.67 - 2.72 (1H, m), 2.35 (4H, s), 2.13 - 2.17 (1H, m), 1.75 - 1.80 (1H, m); <math>^{13}\text{C NMR}</math> (101 MHz, <math>\text{CDCl}_3</math>) <math>\delta</math>: 192.7, 162.4, 143.7, 137.6, 134.6, 134.1, 131.6, 130.8, 129.0, 128.8, 128.7, 128.5, 128.3, 127.9, 127.0, 87.3, 72.6, 30.2, 25.4, 21.2; <b>HRMS</b> (ESI) calculated <math>[\text{M}+\text{H}]^+</math> for <math>\text{C}_{25}\text{H}_{22}\text{O}_2\text{N}</math>: 368.1645, found: 368.1631.</p>                                                       |
| <b>2,4-di-p-tolyl-1-oxa-3-azaspiro[4.6]undec-2-en-6-one (2d)</b>                    |                                                                                                                                                                                                                                                                                                                                                                                                                                                                                                                                                                                                                                                                                                                                                                                                                                                                                                                                 |
|  | <p><b>Rf</b>: 0.34 (Pet. ether/EtOAc = 80/20); <b>Yield</b>: 81 mg, 83%;<br/> Gummy oil; <math>^1\text{H NMR}</math> (500 MHz, <math>\text{CDCl}_3</math>) <math>\delta</math>: 7.91 (d, <math>J = 8.01</math> Hz, 2H), 7.19 (d, <math>J = 8.01</math> Hz, 3H), 7.05 - 7.13 (m, 3H), 5.44 (s, 1H), 2.72 - 2.82 (m, 1H), 2.43 - 2.53 (m, 1H), 2.35 (s, 3H), 2.26 (s, 3H), 1.84 - 1.92 (m, 1H), 1.76 - 1.83 (m, 2H), 1.56 - 1.62 (m, 1H), 1.42 - 1.51 (m, 1H), 1.36 - 1.42 (m, 1H), 1.09 - 1.17 (m, 1H), 1.04 (ddd, <math>J = 14.97, 11.73, 3.43</math> Hz, 1H); <math>^{13}\text{C NMR}</math> (126 MHz, <math>\text{CDCl}_3</math>) : 211.6, 163.3, 142.1, 137.4, 134.5, 129.1, 128.9, 128.4, 127.9, 124.7, 94.9, 75.0, 40.2, 33.3, 27.8, 25.2, 24.3, 21.6, 21.1; <b>HRMS</b> (ESI) calculated <math>[\text{M}+\text{H}]^+</math> for <math>\text{C}_{23}\text{H}_{26}\text{O}_2\text{N}</math>: 348.1958, found: 348.1961.</p> |
| <b>4-(o-tolyl)-2-(p-tolyl)-1-oxa-3-azaspiro[4.6]undec-2-en-6-one (2e)</b>           |                                                                                                                                                                                                                                                                                                                                                                                                                                                                                                                                                                                                                                                                                                                                                                                                                                                                                                                                 |
|                                                                                     | <p><b>Rf</b>: 0.36 (Pet. ether /EtOAc = 80/20); <b>Yield</b>: 83 mg, 85%;<br/> Colourless oil; <math>^1\text{H NMR}</math> (400 MHz, <math>\text{CDCl}_3</math>) <math>\delta</math>: 8.00 (d, <math>J = 7.9</math> Hz, 2H), 7.30 (d, <math>J = 7.9</math> Hz, 2H), 7.15-7.22 (m, 3H),</p>                                                                                                                                                                                                                                                                                                                                                                                                                                                                                                                                                                                                                                      |



|                                                                                                |                                                                                                                                                                                                                                                                                                                                                                                                                                                                                                                                                                                                                                                                                                                                                                                                                                                  |
|------------------------------------------------------------------------------------------------|--------------------------------------------------------------------------------------------------------------------------------------------------------------------------------------------------------------------------------------------------------------------------------------------------------------------------------------------------------------------------------------------------------------------------------------------------------------------------------------------------------------------------------------------------------------------------------------------------------------------------------------------------------------------------------------------------------------------------------------------------------------------------------------------------------------------------------------------------|
| 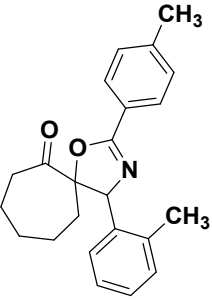              | <p>6.99 (d, <math>J = 6.7</math> Hz, 1H), 5.89 (s, 1H), 2.82-2.94 (m, 1H), 2.53-2.61 (m, 1H), 2.50 (s, 3H), 2.45 (s, 3H), 1.91-1.95 (m, 2H), 1.57-1.74 (m, 3H), 1.50 (dt, <math>J = 15.0, 3.8</math> Hz, 1H), 1.20-1.28 (m, 1H), 1.12 (ddd, <math>J = 15.0, 11.3, 4.3</math> Hz, 1H); <math>^{13}\text{C}</math> NMR (125 MHz, <math>\text{CDCl}_3</math>) <math>\delta</math>: 212.4, 63.4, 142.2, 136.0, 135.6, 130.5, 129.2, 128.3, 128.1, 127.6, 125.9, 124.6, 95.1, 71.5, 40.1, 32.5, 27.4, 25.4, 23.9, 21.6, 19.6; <b>HRMS</b> (ESI) calculated <math>[\text{M}+\text{H}]^+</math> for <math>\text{C}_{23}\text{H}_{26}\text{O}_2\text{N}</math>: 348.1958, found: 348.1942.</p>                                                                                                                                                           |
| <b>4-(3,4-dimethoxyphenyl)-2-(p-tolyl)-1-oxa-3-azaspiro[4.6]undec-2-en-6-one (2f)</b>          |                                                                                                                                                                                                                                                                                                                                                                                                                                                                                                                                                                                                                                                                                                                                                                                                                                                  |
|             | <p><b>Rf</b>: 0.35 (Pet. ether /EtOAc = 80/20); <b>Yield</b>: 84 mg, 86%; Gummy oil; <math>^1\text{H}</math> NMR (400 MHz, <math>\text{CDCl}_3</math>) <math>\delta</math>: 7.97 (d, <math>J = 7.9</math> Hz, 2H), 7.27-7.30 (m, 2H), 7.25 (s, 1H), 6.59 (s, 1H), 6.63 (s, 1H), 3.91 (s, 3H), 3.84 (s, 3H), 2.85-2.95 (m, 1H), 2.48-2.56 (m, 1H), 2.43 (s, 3H), 1.80-1.89 (m, 4H), 1.42-1.54 (m, 2H), 1.25-1.35 (m, 2H); <math>^{13}\text{C}</math> NMR (100 MHz, <math>\text{CDCl}_3</math>) <math>\delta</math>: 215.3 (s), 148.8, 145.9, 143.6, 141.4, 130.2, 129.3, 129.2, 129.0, 127.4, 111.0, 108.9, 99.8, 76.7, 60.5, 56.5, 56.3, 56.0, 44.5, 30.2, 28.7, 25.4, 24.9, 21.5; <b>HRMS</b> (ESI) calculated <math>[\text{M}+\text{H}]^+</math> for <math>\text{C}_{24}\text{H}_{28}\text{O}_4\text{N}</math>: 394.2013, found: 394.2017.</p> |
| <b>9-(tert-butyl)-4-(4-methoxyphenyl)-2-(p-tolyl)-1-oxa-3-azaspiro[4.5]dec-2-en-6-one (2g)</b> |                                                                                                                                                                                                                                                                                                                                                                                                                                                                                                                                                                                                                                                                                                                                                                                                                                                  |
|             | <p><b>Rf</b>: 0.35 (Pet. ether /EtOAc = 80/20); <b>Yield</b>: 79 mg, 81%; Yellow oil; <math>^1\text{H}</math> NMR (400 MHz, <math>\text{CDCl}_3</math>) <math>\delta</math>: 7.94 (d, <math>J = 8.2</math> Hz, 2H), 7.28 (s, 1H), 7.26 (s, 1H), 7.11-7.19 (m, 2H), 6.82-6.88 (m, 2H), 6.04 (s, 1H), 3.81 (s, 3H), 2.99 (td, <math>J = 13.5, 6.0</math> Hz, 1H), 2.56 (dt, <math>J = 12.9, 3.4</math> Hz, 1H), 2.43 (s, 3H), 2.13-2.17 (m, 1H), 1.85-1.96 (m, 2H), 1.64-1.74 (m, 2H),</p>                                                                                                                                                                                                                                                                                                                                                         |

|                                                                                                 |                                                                                                                                                                                                                                                                                                                                                                                                                                                                                                                                                                                                                                                                                                                                                                                                               |
|-------------------------------------------------------------------------------------------------|---------------------------------------------------------------------------------------------------------------------------------------------------------------------------------------------------------------------------------------------------------------------------------------------------------------------------------------------------------------------------------------------------------------------------------------------------------------------------------------------------------------------------------------------------------------------------------------------------------------------------------------------------------------------------------------------------------------------------------------------------------------------------------------------------------------|
|                                                                                                 | <p>0.75 (s, 9H); <sup>13</sup>C NMR (100 MHz, CDCl<sub>3</sub>) δ: 206.9, 159.0, 129.1, 129.0, 128.7, 128.3, 115.4, 113.6, 90.1, 69.1, 55.2, 42.9, 38.9, 37.1, 32.1, 29.7, 28.4, 27.4, 21.6; HRMS (ESI) calculated [M+H]<sup>+</sup> for C<sub>26</sub>H<sub>32</sub>O<sub>3</sub>N: 406.2377, found: 406.2380.</p>                                                                                                                                                                                                                                                                                                                                                                                                                                                                                           |
| <p><b>4-(4-fluorophenyl)-2-phenyl-1-oxa-3-azaspiro[4.6]undec-2-en-6-one (2h)</b></p>            |                                                                                                                                                                                                                                                                                                                                                                                                                                                                                                                                                                                                                                                                                                                                                                                                               |
| 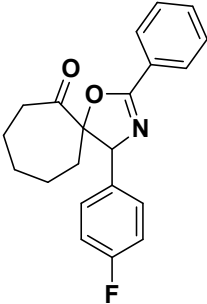              | <p>R<sub>f</sub>: 0.45 (Pet. ether /EtOAc = 80/20); Yield: 50 mg, 65%; colourless oil; <sup>1</sup>H NMR (500 MHz, CDCl<sub>3</sub>) δ: 8.05-8.13 (2H, m), 7.52-7.61 (1H, m), 7.46-7.52 (2H, m), 7.28-7.34 (2H, m), 7.04 (2H, t, <i>J</i> = 8.6 Hz), 5.62 (1H, s), 2.92 (1H, dt, <i>J</i> = 13.2, 5.2 Hz), 2.52-2.60 (1H, m), 1.93-1.99 (2H, m), 1.67-1.72 (1H, m), 1.55-1.64 (2H, m), 1.42 (1H, dt, <i>J</i> = 15.1, 4.1 Hz), 1.18-1.26 (1H, m), 1.06 (1H, ddd, <i>J</i> = 15.3, 11.6, 4.0 Hz); <sup>13</sup>C NMR (125 MHz, CDCl<sub>3</sub>) δ: 211.5, 163.1, 133.4, 131.9, 129.7-129.6 (d, <i>J</i> = 7.6 Hz), 128.6, 128.5, 127.5, 115.3-115.2 (d, <i>J</i> = 21Hz), 95.1, 74.6, 40.3, 33.6, 27.5, 25.3, 23.8; LCMS (ES<sup>+</sup>) <i>m/z</i> = 338.1 ([M + H]<sup>+</sup>, <i>tr</i> = 1.51 min).</p> |
| <p><b>Naphthalen-1-yl(4-phenyl-2-(<i>p</i>-tolyl)-4,5-dihydrooxazol-5-yl)methanone (4a)</b></p> |                                                                                                                                                                                                                                                                                                                                                                                                                                                                                                                                                                                                                                                                                                                                                                                                               |
|              | <p>R<sub>f</sub>: 0.21 (Pet. ether /EtOAc = 80/20); Yield: 73 mg, 74%; White solid; mp: 141°C; <sup>1</sup>H NMR (400 MHz, CDCl<sub>3</sub>) δ: 8.68 (1H, d, <i>J</i> = 8.5 Hz), 8.02 (1H, d, <i>J</i> = 7.9 Hz), 7.95 (2H, d, <i>J</i> = 7.9 Hz), 7.88 (1H, d, <i>J</i> = 7.9 Hz), 7.79 (1H, d, <i>J</i> = 7.3 Hz), 7.49-7.65 (2H, m), 7.43 (1H, t, <i>J</i> = 7.6 Hz), 7.26-7.35 (3H, m), 7.23 (2H, d, <i>J</i> = 7.9 Hz), 7.19 (2H, d, <i>J</i> = 6.7 Hz), 5.72 (1H, d, <i>J</i> = 6.1 Hz), 5.51 (1H, d, <i>J</i> = 6.1 Hz), 2.39 (3H, s); <sup>13</sup>C NMR (101 MHz, CDCl<sub>3</sub>) δ: 198.4, 164.2, 142.3, 141.3, 133.9, 133.7, 132.0, 130.8, 129.1, 128.9, 128.8, 128.6,</p>                                                                                                                       |

|                                                                                     |                                                                                                                                                                                                                                                                                                                                                                                                                                                                                                                                                                                                                                                                                                                                                 |
|-------------------------------------------------------------------------------------|-------------------------------------------------------------------------------------------------------------------------------------------------------------------------------------------------------------------------------------------------------------------------------------------------------------------------------------------------------------------------------------------------------------------------------------------------------------------------------------------------------------------------------------------------------------------------------------------------------------------------------------------------------------------------------------------------------------------------------------------------|
|                                                                                     | 128.5, 128.4, 127.9, 126.7, 126.7, 125.5, 124.1, 124.0, 88.01, 73.8, 21.5; <b>HRMS</b> (ESI) calculated $[M+H]^+$ for $C_{27}H_{22}NO_2$ : 392.1645, found: 392.1650.                                                                                                                                                                                                                                                                                                                                                                                                                                                                                                                                                                           |
| <b>Naphthalen-2-yl(4-phenyl-2-(p-tolyl)-4,5-dihydrooxazol-5-yl)methanone (4b)</b>   |                                                                                                                                                                                                                                                                                                                                                                                                                                                                                                                                                                                                                                                                                                                                                 |
| 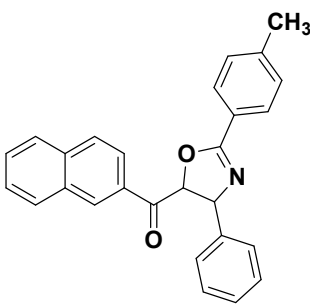   | <b>R<sub>f</sub></b> : 0.23 (Pet. ether /EtOAc = 80/20); <b>Yield</b> : 68 mg, 70%;<br>White solid; <b>mp</b> : 141 °C; <b><sup>1</sup>H NMR</b> (200 MHz, CDCl <sub>3</sub> ) δ: 8.33 (1H, s), 7.85-8.03 (5H, m), 7.80 (1H, d, <i>J</i> = 8.1 Hz), 7.50-7.67 (2H, m), 7.36 (4H, d, <i>J</i> = 4.0 Hz), 7.24 (3H, d, <i>J</i> = 4.2 Hz), 5.80 (1H, d, <i>J</i> = 6.8 Hz), 5.53 (1H, d, <i>J</i> = 6.8 Hz), 2.42 (3H, s); <b><sup>13</sup>C NMR</b> (126 MHz, CDCl <sub>3</sub> ) δ: 194.3, 164.0, 142.3, 141.2, 135.9, 132.3, 131.4, 131.3, 129.6, 129.1, 129.0, 128.9, 128.7, 128.2, 127.8, 127.2, 127.0, 124.2, 124.1, 96.1, 87.0, 73.9, 21.6; <b>HRMS</b> (ESI) calculated $[M+H]^+$ for $C_{27}H_{22}NO_2$ : 392.1645, found: 392.1645.     |
| <b>Phenyl(4-phenyl-2-(p-tolyl)-4,5-dihydrooxazol-5-yl)methanone (4c)</b>            |                                                                                                                                                                                                                                                                                                                                                                                                                                                                                                                                                                                                                                                                                                                                                 |
|  | <b>R<sub>f</sub></b> : 0.19 (Pet. ether /EtOAc = 80/20); <b>Yield</b> : 73 mg, 73%;<br>White solid; <b>mp</b> : 140 °C; <b><sup>1</sup>H NMR</b> (500 MHz, CDCl <sub>3</sub> ) δ: 7.98 (2 H, d, <i>J</i> = 8.4 Hz), 7.93 (2 H, m, <i>J</i> = 7.2 Hz), 7.61 (1 H, t, <i>J</i> = 7.4 Hz), 7.47 (2H, t, <i>J</i> = 7.8 Hz), 7.38 (2H, m), 7.32 (3 H, m), 7.25 (2H, d, <i>J</i> = 8.0 Hz), 5.67 (1H, d, <i>J</i> = 6.9 Hz), 5.50 (1H, d, <i>J</i> = 6.5 Hz), 2.41 (3H, s); <b><sup>13</sup>C NMR</b> (50 MHz, CDCl <sub>3</sub> ) δ: 194.5, 163.8, 142.2, 141.1, 134.1, 133.9, 129.1, 129.0, 128.9, 128.7, 128.6, 128.0, 127.0, 124.0, 86.6, 73.5, 21.5; <b>HRMS</b> (ESI) calculated $[M+H]^+$ for $C_{23}H_{20}NO_2$ : 342.1489, found: 342.1489. |
| <b>(4-phenyl-2-(p-tolyl)-4,5-dihydrooxazol-5-yl)(p-tolyl)methanone (4d)</b>         |                                                                                                                                                                                                                                                                                                                                                                                                                                                                                                                                                                                                                                                                                                                                                 |
|                                                                                     | <b>R<sub>f</sub></b> : 0.22 (Pet. ether /EtOAc = 80/20); <b>Yield</b> : 76 mg, 77%;                                                                                                                                                                                                                                                                                                                                                                                                                                                                                                                                                                                                                                                             |

|                                                                                            |                                                                                                                                                                                                                                                                                                                                                                                                                                                                                                                                                                                                                                                                                                                                                                                                                                                                              |
|--------------------------------------------------------------------------------------------|------------------------------------------------------------------------------------------------------------------------------------------------------------------------------------------------------------------------------------------------------------------------------------------------------------------------------------------------------------------------------------------------------------------------------------------------------------------------------------------------------------------------------------------------------------------------------------------------------------------------------------------------------------------------------------------------------------------------------------------------------------------------------------------------------------------------------------------------------------------------------|
| 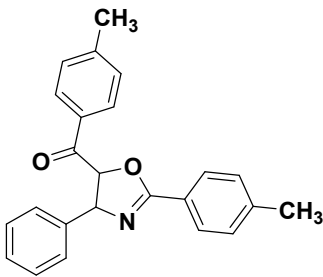          | <p>White solid; <b>mp:</b> 101 °C; <math>^1\text{H NMR}</math> (200 MHz, <math>\text{CDCl}_3</math>) <math>\delta</math>: 7.97 (2H, d, <math>J = 8.2</math> Hz), 7.72-7.87 (2H, m), 7.35-7.42 (1H, m), 7.30-7.35 (3H, m), 7.24-7.30 (3H, m), 7.20-7.24 (2H, m), 5.64 (1H, d, <math>J = 6.6</math> Hz), 5.47 (1H, d, <math>J = 6.6</math> Hz), 2.41 (3H, s), 2.40 (3H, s); <math>^{13}\text{C NMR}</math> (50 MHz, <math>\text{CDCl}_3</math>) <math>\delta</math>: 194.1, 163.9, 144.9, 142.2, 141.2, 131.6, 129.5, 129.2, 129.1, 128.9, 128.8, 128.0, 127.0, 124.1, 86.6, 73.6, 21.7, 21.6; <b>HRMS</b> (ESI) calculated <math>[\text{M}+\text{H}]^+</math> for <math>\text{C}_{24}\text{H}_{22}\text{NO}_2</math>: 356.1645, found: 356.1645.</p>                                                                                                                          |
| <p><b>(4-methoxyphenyl)(4-phenyl-2-(p-tolyl)-4,5-dihydrooxazol-5-yl)methanone (4e)</b></p> |                                                                                                                                                                                                                                                                                                                                                                                                                                                                                                                                                                                                                                                                                                                                                                                                                                                                              |
|          | <p><b>Rf:</b> 0.21 (Pet. ether /EtOAc = 80/20); <b>Yield:</b> 73 mg, 72%; White solid; <b>mp:</b> 141°C; <math>^1\text{H NMR}</math> (500 MHz, <math>\text{CDCl}_3</math>) <math>\delta</math>: 7.97 (2H, m, <math>J = 8.01</math> Hz), 7.91 (2H, m, <math>J = 8.77</math> Hz), 7.37 (2H, m), 7.32 (3H, m), 7.25 (2H, d, <math>J = 8.01</math> Hz), 6.93 (2H, m, <math>J = 9.16</math> Hz), 5.62 (1H, d, <math>J = 6.87</math> Hz), 5.50 (1H, d, <math>J = 6.87</math> Hz), 3.87 (3H, s), 2.41 (3 H, s); <math>^{13}\text{C NMR}</math> (126 MHz, <math>\text{CDCl}_3</math>) <math>\delta</math>: 192.9, 164.2, 142.3, 141.3, 131.4, 129.1, 128.9, 128.7, 128.0, 127.1, 127.0, 124.1, 114.0, 86.5, 73.6, 55.5, 21.6; <b>HRMS</b> (ESI) calculated <math>[\text{M}+\text{H}]^+</math> for <math>\text{C}_{24}\text{H}_{22}\text{NO}_3</math>: 372.1594, found: 372.1594.</p> |
| <p><b>(4-bromophenyl)(4-phenyl-2-(p-tolyl)-4,5-dihydrooxazol-5-yl)methanone (4f)</b></p>   |                                                                                                                                                                                                                                                                                                                                                                                                                                                                                                                                                                                                                                                                                                                                                                                                                                                                              |
|                                                                                            | <p><b>Rf:</b> 0.24 (Pet. ether /EtOAc = 80/20); <b>Yield:</b> 79 mg, 80%; White solid; <b>mp:</b> 110 °C; <math>^1\text{H NMR}</math> (500 MHz, <math>\text{CDCl}_3</math>) <math>\delta</math>: 7.95 (2H, d, <math>J = 8.01</math> Hz), 7.80 (2H, m, <math>J = 8.39</math> Hz), 7.61 (2H, m, <math>J = 8.77</math> Hz), 7.38 (2H, m), 7.32 (3H, m), 7.25 (2H, d, <math>J = 8.01</math> Hz), 5.59 (1H, d, <math>J = 6.87</math> Hz), 5.51 (1H, d, <math>J = 6.49</math> Hz), 2.41 (3H, s); <math>^{13}\text{C NMR}</math> (126 MHz, <math>\text{CDCl}_3</math>) <math>\delta</math>:</p>                                                                                                                                                                                                                                                                                     |

|                                                                                           |                                                                                                                                                                                                                                                                                                                                                                                                                                                                                                                                                                                                                                                                                                                                                                                                                                                       |
|-------------------------------------------------------------------------------------------|-------------------------------------------------------------------------------------------------------------------------------------------------------------------------------------------------------------------------------------------------------------------------------------------------------------------------------------------------------------------------------------------------------------------------------------------------------------------------------------------------------------------------------------------------------------------------------------------------------------------------------------------------------------------------------------------------------------------------------------------------------------------------------------------------------------------------------------------------------|
| 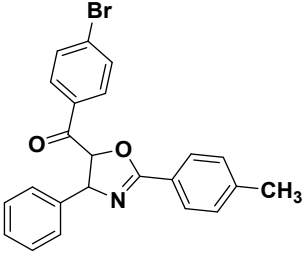         | <p>193.8, 163.7, 142.4, 141.0, 132.9, 132.1, 130.5, 129.4, 129.2, 129.0, 128.6, 128.2, 127.0, 123.9, 86.7, 73.4, 21.6; <b>HRMS</b> (ESI) calculated <math>[M+H]^+</math> for <math>C_{23}H_{19}NO_2Br</math>: 420.0594, found: 420.0598.</p>                                                                                                                                                                                                                                                                                                                                                                                                                                                                                                                                                                                                          |
| <p><b>(4-chlorophenyl)(4-phenyl-2-(p-tolyl)-4,5-dihydrooxazol-5-yl)methanone (4g)</b></p> |                                                                                                                                                                                                                                                                                                                                                                                                                                                                                                                                                                                                                                                                                                                                                                                                                                                       |
|         | <p><b>Rf</b>: 0.21 (Pet. ether /EtOAc = 80/20); <b>Yield</b>: 77 mg, 78%;<br/> White solid; <b>mp</b>: 146 °C; <b><sup>1</sup>H NMR</b> (500 MHz, <math>CDCl_3</math>) <math>\delta</math>: 7.96 (2H, d, <math>J = 8.01</math> Hz), 7.88 (2H, m, <math>J = 8.39</math> Hz), 7.46 (2H, m, <math>J = 8.39</math> Hz), 7.39 (2H, m), 7.35 (1H, d, <math>J = 6.87</math> Hz), 7.31 (2H, d, <math>J = 6.87</math> Hz), 7.26 (2H, m), 5.61 (1H, d, <math>J = 6.49</math> Hz), 5.51 (1H, d, <math>J = 6.49</math> Hz), 2.42 (3H, s); <b><sup>13</sup>C NMR</b> (126 MHz, <math>CDCl_3</math>) <math>\delta</math>: 193.5, 163.8, 142.5, 141.0, 140.6, 132.5, 130.5, 129.2, 129.2, 129.0, 128.6, 128.2, 127.0, 123.9, 86.7, 73.4, 21.6; <b>HRMS</b> (ESI) calculated <math>[M+H]^+</math> for <math>C_{23}H_{19}NO_2Cl</math>: 376.1099, found: 376.1100.</p> |
| <p><b>(4-fluorophenyl)(4-phenyl-2-(p-tolyl)-4,5-dihydrooxazol-5-yl)methanone (4h)</b></p> |                                                                                                                                                                                                                                                                                                                                                                                                                                                                                                                                                                                                                                                                                                                                                                                                                                                       |
|        | <p><b>Rf</b>: 0.25 (Pet. ether /EtOAc = 80/20); <b>Yield</b>: 80 mg, 81%;<br/> White solid; <b>mp</b>: 128°C; <b><sup>1</sup>H NMR</b> (200 MHz, <math>CDCl_3</math>) <math>\delta</math>: 7.97-8.04 (2H, m), 7.91-7.97 (2H, m), 7.33-7.47 (3H, m), 7.28-7.33 (2H, m), 7.22-7.28 (2H, m), 7.08-7.19 (2H, m), 5.60 (1H, d, <math>J = 6.8</math> Hz), 5.52 (1H, d, <math>J = 6.7</math> Hz), 2.41 (3H, s); <b><sup>13</sup>C NMR</b> (50 MHz, <math>CDCl_3</math>) <math>\delta</math>: 193.0, 168.7, 163.7, 142.3, 141.1, 131.9, 131.7, 130.7, 130.6, 129.1, 128.9, 128.6, 128.1, 127.0, 124.0, 116.2, 115.8, 86.7, 73.4, 21.6; <b>HRMS</b> (ESI) calculated <math>[M+H]^+</math> for <math>C_{23}H_{19}NO_2F</math>: 360.1394, found:</p>                                                                                                             |

|                                                                                     |                                                                                                                                                                                                                                                                                                                                                                                                                                                                                                                                                                                                                                                                                                                                                                                                                                           |
|-------------------------------------------------------------------------------------|-------------------------------------------------------------------------------------------------------------------------------------------------------------------------------------------------------------------------------------------------------------------------------------------------------------------------------------------------------------------------------------------------------------------------------------------------------------------------------------------------------------------------------------------------------------------------------------------------------------------------------------------------------------------------------------------------------------------------------------------------------------------------------------------------------------------------------------------|
|                                                                                     | 360.1393.                                                                                                                                                                                                                                                                                                                                                                                                                                                                                                                                                                                                                                                                                                                                                                                                                                 |
| <b>(4-iodophenyl)(4-phenyl-2-(p-tolyl)-4,5-dihydrooxazol-5-yl)methanone (4i)</b>    |                                                                                                                                                                                                                                                                                                                                                                                                                                                                                                                                                                                                                                                                                                                                                                                                                                           |
| 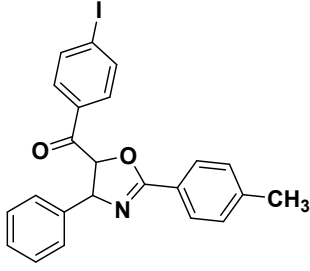   | <p><b>Rf:</b> 0.30 (Pet. ether /EtOAc = 80/20); <b>Yield:</b> 70 mg, 72%;</p> <p>White solid; <b>mp:</b> 140 °C; <b><sup>1</sup>H NMR</b> (400 MHz, CDCl<sub>3</sub>) δ: 7.95 (2H, d, <i>J</i> = 7.3 Hz), 7.85 (2H, d, <i>J</i> = 7.3 Hz), 7.64 (2H, d, <i>J</i> = 7.3 Hz), 7.37 (3H, m), 7.30 (2H, m), 7.25 (2H, d, <i>J</i> = 7.3 Hz), 5.58 (1H, d, <i>J</i> = 6.1 Hz), 5.51 (1H, d, <i>J</i> = 6.1 Hz), 2.42 (3H, s); <b><sup>13</sup>C NMR</b> (101 MHz, CDCl<sub>3</sub>) δ: 194.1, 163.8, 142.5, 141.0, 138.1, 133.4, 130.4, 129.2, 129.0, 128.7, 128.2, 127.0, 123.9, 102.4, 86.7, 73.4, 21.6; <b>HRMS</b> (ESI) calculated [M+H]<sup>+</sup> for C<sub>23</sub>H<sub>19</sub>NO<sub>2</sub>I: 468.0455, found: 468.0457.</p>                                                                                                      |
| <b>(3-bromophenyl)(4-phenyl-2-(p-tolyl)-4,5-dihydrooxazol-5-yl)methanone (4j)</b>   |                                                                                                                                                                                                                                                                                                                                                                                                                                                                                                                                                                                                                                                                                                                                                                                                                                           |
|  | <p><b>Rf:</b> 0.22 (Pet. ether /EtOAc = 80/20); <b>Yield:</b> 82 mg, 84%;</p> <p>White solid; <b>mp:</b> 146 °C; <b><sup>1</sup>H NMR</b> (200 MHz, CDCl<sub>3</sub>) δ: 8.07 (1H, t, <i>J</i> = 1.8 Hz), 7.96 (2H, d, <i>J</i> = 8.2 Hz), 7.83 (1H, dt, <i>J</i> = 7.8, 1.4 Hz), 7.72 (1H, ddd, <i>J</i> = 8.0, 1.9, 1.0 Hz), 7.39 (1H, d, <i>J</i> = 1.3 Hz), 7.34 (4H, ddd, <i>J</i> = 5.8, 4.1, 2.2 Hz), 7.21-7.30 (3H, m), 5.58 (1H, d, <i>J</i> = 6.6 Hz), 5.50 (1H, d, <i>J</i> = 6.7 Hz), 2.41 (3H, s); <b><sup>13</sup>C NMR</b> (50 MHz, CDCl<sub>3</sub>) δ: 193.4, 163.7, 142.4, 140.9, 136.7, 135.8, 132.1, 130.3, 129.1, 129.0, 128.6, 128.2, 127.5, 126.9, 123.9, 123.1, 86.8, 73.5, 21.6; <b>HRMS</b> (ESI) calculated [M+H]<sup>+</sup> for C<sub>23</sub>H<sub>19</sub>NO<sub>2</sub>Br: 420.0594, found: 420.0601.</p> |
| <b>(3-nitrophenyl)(4-phenyl-2-(p-tolyl)-4,5-dihydrooxazol-5-yl)methanone (4k)</b>   |                                                                                                                                                                                                                                                                                                                                                                                                                                                                                                                                                                                                                                                                                                                                                                                                                                           |
|                                                                                     | <p><b>Rf:</b> 0.26 (Pet. ether /EtOAc = 80/20); <b>Yield:</b> 78 mg, 79%;</p> <p>White solid; <b>mp:</b> 152 °C; <b><sup>1</sup>H NMR</b> (200 MHz, CDCl<sub>3</sub>) δ:</p>                                                                                                                                                                                                                                                                                                                                                                                                                                                                                                                                                                                                                                                              |

|                                                                                        |                                                                                                                                                                                                                                                                                                                                                                                                                                                                                                                                                                                                                                                                                                                                                                                                                                                    |
|----------------------------------------------------------------------------------------|----------------------------------------------------------------------------------------------------------------------------------------------------------------------------------------------------------------------------------------------------------------------------------------------------------------------------------------------------------------------------------------------------------------------------------------------------------------------------------------------------------------------------------------------------------------------------------------------------------------------------------------------------------------------------------------------------------------------------------------------------------------------------------------------------------------------------------------------------|
| 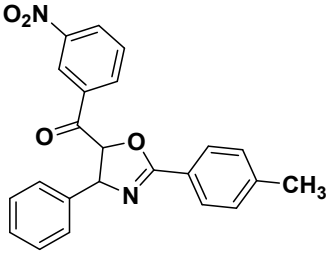      | <p>8.05 (d, <math>J = 8.2</math> Hz, 2H), 7.92 (dt, <math>J = 7.8, 1.8</math> Hz, 1H), 7.74 (d, <math>J = 2.0</math> Hz, 1H), 7.46-7.59 (m, 3H), 7.37 (s, 1H), 7.33 (s, 2H), 7.30 (s, 1H), 6.35 (d, <math>J = 10.9</math> Hz, 1H), 5.92 (d, <math>J = 10.9</math> Hz, 1H), 2.47 (s, 3H); <math>^{13}\text{C}</math> NMR (50 MHz, <math>\text{CDCl}_3</math>) <math>\delta</math>: 207.1, 194.3, 164.6, 148.7, 143.6, 142.9, 134.4, 134.3, 133.3, 129.9, 129.3, 129.0, 128.8, 123.6, 123.1, 122.1, 86.5, 72.1, 31.0, 21.7; <b>HRMS</b> (ESI) calculated <math>[\text{M}+\text{H}]^+</math> for <math>\text{C}_{23}\text{H}_{19}\text{N}_2\text{O}_4</math>: 387.1339, found: 387.1339.</p>                                                                                                                                                          |
| <b>(2,4-dichlorophenyl)(4-phenyl-2-(p-tolyl)-4,5-dihydrooxazol-5-yl)methanone (4l)</b> |                                                                                                                                                                                                                                                                                                                                                                                                                                                                                                                                                                                                                                                                                                                                                                                                                                                    |
|      | <p><b>R<sub>f</sub></b>: 0.25 (Pet. ether /EtOAc = 80/20); <b>Yield</b>: 84 mg, 85%; White solid; mp: 110 °C; <math>^1\text{H}</math> NMR (200 MHz, <math>\text{CDCl}_3</math>) <math>\delta</math>: 7.84 (2H, d, <math>J = 8.2</math> Hz), 7.47 (1H, d, <math>J = 1.9</math> Hz), 7.37-7.43 (1H, m), 7.30-7.36 (3H, m), 7.23-7.30 (5 H, m), 7.20 (1H, s), 5.55 (1H, d, <math>J = 6.2</math> Hz), 5.45 (1H, d, <math>J = 6.3</math> Hz), 2.39 (3H, s) <math>^{13}\text{C}</math> NMR (50 MHz, <math>\text{CDCl}_3</math>) <math>\delta</math>: 199.3, 163.7, 142.4, 141.2, 138.0, 134.8, 132.8, 130.3, 130.3, 129.2, 128.8, 128.5, 128.0, 127.2, 126.5, 123.8, 88.6, 73.8, 21.6; <b>HRMS</b> (ESI) calculated <math>[\text{M}+\text{H}]^+</math> for <math>\text{C}_{23}\text{H}_{18}\text{NO}_2\text{Cl}_2</math>: 410.0709, found: 410.0705.</p> |
| <b>(4-phenyl-2-(p-tolyl)-4,5-dihydrooxazol-5-yl)(thiophen-2-yl)methanone (4m)</b>      |                                                                                                                                                                                                                                                                                                                                                                                                                                                                                                                                                                                                                                                                                                                                                                                                                                                    |
|     | <p><b>R<sub>f</sub></b>: 0.26 (Pet. ether /EtOAc = 80/20); <b>Yield</b>: 88 mg, 90%; White solid; mp: 148 °C; <math>^1\text{H}</math> NMR (200 MHz, <math>\text{CDCl}_3</math>) <math>\delta</math>: 8.07 (d, <math>J = 8.2</math> Hz, 2H), 7.60 (dd, <math>J = 1.0, 3.9</math> Hz, 1H), 7.54 (dd, <math>J = 1.1, 4.9</math> Hz, 1H), 7.32 (d, <math>J = 8.0</math> Hz, 3H), 7.12- 6.98 (m, 6 H), 5.96-5.80 (m, 2H), 2.46 (s, 3H); <math>^{13}\text{C}</math> NMR (50 MHz, <math>\text{CDCl}_3</math>) <math>\delta</math>: 193.6, 166.2, 147.4, 144.1, 143.0, 135.4, 133.9, 129.3, 129.2, 128.8, 128.7, 127.7, 123.5, 123.0, 83.8,</p>                                                                                                                                                                                                            |

|                                                                                          |                                                                                                                                                                                                                                                                                                                                                                                                                                                                                                                                                                                                                                                                                                       |
|------------------------------------------------------------------------------------------|-------------------------------------------------------------------------------------------------------------------------------------------------------------------------------------------------------------------------------------------------------------------------------------------------------------------------------------------------------------------------------------------------------------------------------------------------------------------------------------------------------------------------------------------------------------------------------------------------------------------------------------------------------------------------------------------------------|
|                                                                                          | 73.3, 21.7; <b>HRMS</b> (ESI) calculated $[M+H]^+$ for $C_{21}H_{18}NO_2S$ : 348.1053, found: 348.1053.                                                                                                                                                                                                                                                                                                                                                                                                                                                                                                                                                                                               |
| <b>(5-bromothiophen-2-yl)(4-phenyl-2-(p-tolyl)-4,5-dihydrooxazol-5-yl)methanone (4n)</b> |                                                                                                                                                                                                                                                                                                                                                                                                                                                                                                                                                                                                                                                                                                       |
| 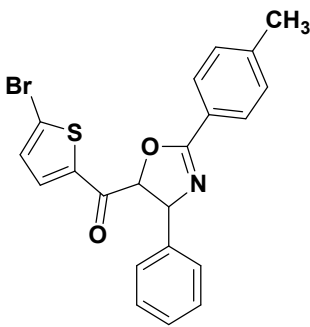        | <b>R<sub>f</sub></b> : 0.34 (Pet. ether /EtOAc = 80/20); <b>Yield</b> : 80 mg, 82%;<br>White Solid ; <b><sup>1</sup>H NMR</b> (400 MHz, CDCl <sub>3</sub> ) δ: 8.01 (2H, t, <i>J</i> = 6.4 Hz), 7.94 (2H, m), 7.66 (1H, d, <i>J</i> = 6.7 Hz), 7.53 (2H, d, <i>J</i> = 6.7 Hz), 7.25 (2H, m), 6.96 (1H, m), 6.79 (1H, m), 5.72 (2H, m), 2.41 (3H, br. s.); <b><sup>13</sup>C NMR</b> (101 MHz, CDCl <sub>3</sub> ) δ: 193.8, 164.5, 146.4, 142.7, 134.2, 129.9, 129.2, 129.2, 128.9, 128.7, 125.2, 123.6, 86.2, 69.1, 21.6; <b>HRMS</b> (ESI) calculated $[M+H]^+$ for $C_{21}H_{17}O_2NBrS$ : 426.0158, found: 426.0156.                                                                             |
| <b>(4-(naphthalen-1-yl)-2-(p-tolyl)-4,5-dihydrooxazol-5-yl)(phenyl)methanone (4o)</b>    |                                                                                                                                                                                                                                                                                                                                                                                                                                                                                                                                                                                                                                                                                                       |
|       | <b>R<sub>f</sub></b> : 0.28 (Pet. ether /EtOAc = 80/20); <b>Yield</b> : 72 mg, 73%;<br>White solid; <b>mp</b> : 95 °C; <b><sup>1</sup>H NMR</b> (500 MHz, CDCl <sub>3</sub> ) δ: 7.96 (6H, d, <i>J</i> = 8.4 Hz), 7.64 (1H, t, <i>J</i> = 7.2 Hz), 7.50 (2H, t, <i>J</i> = 7.8 Hz), 7.31 (4H, m), 7.27 (3H, m), 7.20 (1H, m), 5.60 (1H, d, <i>J</i> = 6.5 Hz), 5.55 (1H, d, <i>J</i> = 6.9 Hz), 2.42 (3H, s); <b><sup>13</sup>C NMR</b> (101 MHz, CDCl <sub>3</sub> ) δ: 194.4, 164.2, 143.3, 142.6, 134.9, 134.2, 134.1, 130.2, 129.2, 129.2, 128.9, 128.7, 128.3, 127.1, 125.2, 123.8, 86.5, 72.7, 21.6; <b>HRMS</b> (ESI) calculated $[M+H]^+$ for $C_{27}H_{15}NONa$ : 392.1046, found: 392.1059. |
| <b>(4-(4-bromophenyl)-2-(p-tolyl)-4,5-dihydrooxazol-5-yl)(phenyl)methanone (4p)</b>      |                                                                                                                                                                                                                                                                                                                                                                                                                                                                                                                                                                                                                                                                                                       |
|                                                                                          | <b>R<sub>f</sub></b> : 0.24 (Pet. ether /EtOAc = 80/20); <b>Yield</b> : 63 mg, 63%;<br>White solid; <b>mp</b> : 96 °C; <b><sup>1</sup>H NMR</b> (400 MHz, CDCl <sub>3</sub> ) δ: 8.02 (2H, d, <i>J</i> = 6.7 Hz), 7.55 (2H, m, <i>J</i> = 7.3 Hz), 7.50 (1H,                                                                                                                                                                                                                                                                                                                                                                                                                                          |



|                                                                                                      |                                                                                                                                                                                                                                                                                                                                                                                                                                                                                                                                                                                                                                                                                                                                                                                                                                                                                               |
|------------------------------------------------------------------------------------------------------|-----------------------------------------------------------------------------------------------------------------------------------------------------------------------------------------------------------------------------------------------------------------------------------------------------------------------------------------------------------------------------------------------------------------------------------------------------------------------------------------------------------------------------------------------------------------------------------------------------------------------------------------------------------------------------------------------------------------------------------------------------------------------------------------------------------------------------------------------------------------------------------------------|
| 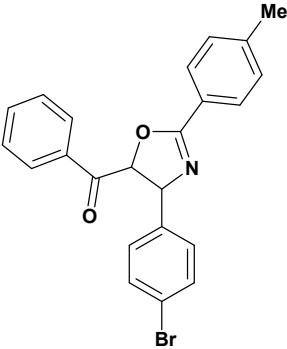                    | <p>d, <math>J = 7.3</math> Hz), 7.35 (2H, m), 7.29 (2H, m, <math>J = 7.3</math> Hz), 7.13 (2H, m), 6.80 (2H, d, <math>J = 6.7</math> Hz), 6.25 (1H, d, <math>J = 11.0</math> Hz), 5.77 (1H, d, <math>J = 10.4</math> Hz), 2.44 (3H, s); <math>^{13}\text{C}</math> NMR (101 MHz, <math>\text{CDCl}_3</math>) <math>\delta</math>: 194.1, 165.6, 142.7, 135.7, 133.5, 131.7, 131.0, 129.8, 129.3, 128.8, 128.6, 127.7, 123.8, 122.0, 84.1, 73.4, 21.7; <b>HRMS</b> (ESI) calculated <math>[\text{M}+\text{H}]^+</math> for <math>\text{C}_{23}\text{H}_{19}\text{NO}_2\text{Br}</math>: 420.0594, found: 420.0596.</p>                                                                                                                                                                                                                                                                         |
| <p><b>(4-(4-nitrophenyl)-2-(p-tolyl)-4,5-dihydrooxazol-5-yl)(phenyl)methanone (4q)</b></p>           |                                                                                                                                                                                                                                                                                                                                                                                                                                                                                                                                                                                                                                                                                                                                                                                                                                                                                               |
|                    | <p><b>Rf</b>: 0.30 (Pet. ether /EtOAc = 80/20); <b>Yield</b>: 70 mg, 69%; White solid; <b>mp</b>: 188 °C; <math>^1\text{H}</math> NMR (400 MHz, <math>\text{CDCl}_3</math>) <math>\delta</math>: 8.03 (2H, d, <math>J = 7.9</math> Hz), 7.87 (2H, d, <math>J = 8.5</math> Hz), 7.55 (3H, d, <math>J = 7.9</math> Hz), 7.50 (1H, d, <math>J = 7.3</math> Hz), 7.31 (5H, m), 7.13 (2H, d, <math>J = 8.5</math> Hz), 6.33 (1H, d, <math>J = 10.4</math> Hz), 5.90 (1H, d, <math>J = 11.0</math> Hz), 2.45 (3H, s); <math>^{13}\text{C}</math> NMR (101 MHz, <math>\text{CDCl}_3</math>) <math>\delta</math>: 193.7, 166.3, 147.4, 144.1, 143.0, 135.4, 133.9, 129.3, 129.2, 128.8, 128.7, 127.7, 123.5, 123.0, 83.8, 73.3, 21.7; <b>HRMS</b> (ESI) calculated <math>[\text{M}+\text{H}]^+</math> for <math>\text{C}_{23}\text{H}_{19}\text{N}_2\text{O}_4</math>: 387.1339, found: 387.1340.</p> |
| <p><b>phenyl(2-(p-tolyl)-4-(4-(trifluoromethyl)phenyl)-4,5-dihydrooxazol-5-yl)methanone (4r)</b></p> |                                                                                                                                                                                                                                                                                                                                                                                                                                                                                                                                                                                                                                                                                                                                                                                                                                                                                               |
|                   | <p><b>Rf</b>: 0.25 (Pet. ether /EtOAc = 80/20); <b>Yield</b>: 72 mg, 73%; White solid; <b>mp</b>: 82 °C; <math>^1\text{H}</math> NMR (200 MHz, <math>\text{CDCl}_3</math>) <math>\delta</math>: 8.12-7.99 (m, <math>J = 8.2</math> Hz, 2H), 7.57-7.42 (m, 3H), 7.40-7.27 (m, 5H), 7.25 (s, 1H), 7.12-6.97 (m, <math>J = 8.1</math> Hz, 2H), 6.31 (d, <math>J = 10.9</math> Hz, 1H), 5.85 (d, <math>J = 10.7</math> Hz, 1H), 2.46 (s, 3H); <math>^{13}\text{C}</math> NMR (50 MHz, <math>\text{CDCl}_3</math>) <math>\delta</math>: 194.2, 165.8, 142.8, 140.7, 135.7, 133.5, 129.3, 128.8, 128.6, 127.6, 124.8-124.7 (d, <math>J = 3.83</math> Hz), 123.7, 84.0, 73.5, 21.7; <b>HRMS</b> (ESI) calculated</p>                                                                                                                                                                                 |

|                                                                                      |                                                                                                                                                                                                                                                                                                                                                                                                                                                                                                                                                                                                                                                                                                                 |
|--------------------------------------------------------------------------------------|-----------------------------------------------------------------------------------------------------------------------------------------------------------------------------------------------------------------------------------------------------------------------------------------------------------------------------------------------------------------------------------------------------------------------------------------------------------------------------------------------------------------------------------------------------------------------------------------------------------------------------------------------------------------------------------------------------------------|
|                                                                                      | [M+H] <sup>+</sup> for C <sub>24</sub> H <sub>19</sub> NO <sub>2</sub> F <sub>3</sub> : 410.1362, found: 410.1357.                                                                                                                                                                                                                                                                                                                                                                                                                                                                                                                                                                                              |
| <b>(4-(3-bromophenyl)-2-(p-tolyl)-4,5-dihydrooxazol-5-yl)(phenyl)methanone (4s)</b>  |                                                                                                                                                                                                                                                                                                                                                                                                                                                                                                                                                                                                                                                                                                                 |
| 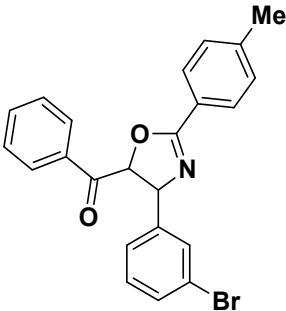    | <b>R<sub>f</sub></b> : 0.27 (Pet. ether /EtOAc = 80/20); <b>Yield</b> : 82 mg, 83%;<br>White solid; <b>mp</b> : 98 °C; <b><sup>1</sup>H NMR</b> (500 MHz, CDCl <sub>3</sub> ) δ: 7.96 (4H, d, <i>J</i> = 8.0 Hz), 7.65 (1H, m), 7.49 (4H, m), 7.25 (5H, m), 5.60 (1H, d, <i>J</i> = 6.9 Hz), 5.54 (1H, d, <i>J</i> = 6.9 Hz), 2.42 (3H, s); <b><sup>13</sup>C NMR</b> (126 MHz, CDCl <sub>3</sub> ) δ: 194.3, 164.2, 143.5, 142.6, 134.2, 131.2, 130.5, 130.0, 129.2, 129.2, 128.9, 128.7, 125.7, 123.8, 123.1, 86.5, 72.6, 21.6; <b>HRMS</b> (ESI) calculated [M+H] <sup>+</sup> for C <sub>23</sub> H <sub>19</sub> NO <sub>2</sub> Br: 422.0573, found: 422.0569.                                            |
| <b>(4-(3-chlorophenyl)-2-(p-tolyl)-4,5-dihydrooxazol-5-yl)(phenyl)methanone (4t)</b> |                                                                                                                                                                                                                                                                                                                                                                                                                                                                                                                                                                                                                                                                                                                 |
|   | <b>R<sub>f</sub></b> : 0.27 (Pet. ether /EtOAc = 80/20); <b>Yield</b> : 79 mg, 80%;<br>White solid; <b>mp</b> : 146 °C; <b><sup>1</sup>H NMR</b> (200 MHz, CDCl <sub>3</sub> ) δ: 8.04 (d, <i>J</i> = 8.2 Hz, 2H), 7.61-7.44 (m, 3H), 7.41-7.28 (m, 4H), 7.07-6.92 (m, 2H), 6.92-6.72 (m, 2H), 6.27 (d, <i>J</i> = 11.0 Hz, 1H), 5.77 (d, <i>J</i> = 10.5 Hz, 1H), 2.45 (s, 3H); <b><sup>13</sup>C NMR</b> (50 MHz, CDCl <sub>3</sub> ) δ: 194.1, 165.7, 142.7, 138.6, 135.7, 133.8, 133.5, 129.2, 129.2, 128.8, 128.5, 128.4, 128.0, 127.7, 126.3, 123.7, 84.0, 73.4, 21.7; <b>HRMS</b> (ESI) calculated [M+H] <sup>+</sup> for C <sub>23</sub> H <sub>19</sub> NO <sub>2</sub> Cl: 376.1099, found: 376.1103. |
| <b>phenyl(4-(o-tolyl)-2-(p-tolyl)-4,5-dihydrooxazol-5-yl)methanone (4u)</b>          |                                                                                                                                                                                                                                                                                                                                                                                                                                                                                                                                                                                                                                                                                                                 |
|                                                                                      | <b>R<sub>f</sub></b> : 0.25 (Pet. ether /EtOAc = 80/20); <b>Yield</b> : 83 mg, 84%;<br>White solid; <b>mp</b> : 118 °C; <b><sup>1</sup>H NMR</b> (200 MHz, CDCl <sub>3</sub> ) δ: 8.01-7.90 (m, 4H), 7.66-7.56 (m, 1H), 7.52-7.43 (m, 2H), 7.35-7.26 (m, 2H), 7.25-7.11 (m, 4H), 5.85 (d, <i>J</i> = 6.4 Hz, 1H), 5.69 (d, <i>J</i> = 6.4 Hz, 1H), 2.41 (s, 3H), 2.24 (s, 3H); <b><sup>13</sup>C</b>                                                                                                                                                                                                                                                                                                            |

|                                                                                             |                                                                                                                                                                                                                                                                                                                                                                                                                                                                                                                                                                                                                                                                                                                                                                                                                                                                                          |
|---------------------------------------------------------------------------------------------|------------------------------------------------------------------------------------------------------------------------------------------------------------------------------------------------------------------------------------------------------------------------------------------------------------------------------------------------------------------------------------------------------------------------------------------------------------------------------------------------------------------------------------------------------------------------------------------------------------------------------------------------------------------------------------------------------------------------------------------------------------------------------------------------------------------------------------------------------------------------------------------|
| 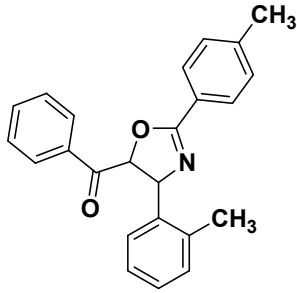           | <p><b>NMR</b> (50 MHz, CDCl<sub>3</sub>) <math>\delta</math>: 194.5, 163.6, 142.2, 139.2, 135.5, 134.3, 133.9, 130.6, 129.1, 128.9, 128.7, 128.6, 127.9, 127.0, 126.8, 124.1, 86.2, 69.7, 21.6, 19.3; <b>HRMS</b> (ESI) calculated [M+H]<sup>+</sup> for C<sub>24</sub>H<sub>22</sub>NO<sub>2</sub>: 356.1645, found: 356.1645.</p>                                                                                                                                                                                                                                                                                                                                                                                                                                                                                                                                                      |
| <p><b>(4-(2-fluorophenyl)-2-(p-tolyl)-4,5-dihydrooxazol-5-yl)(phenyl)methanone (4v)</b></p> |                                                                                                                                                                                                                                                                                                                                                                                                                                                                                                                                                                                                                                                                                                                                                                                                                                                                                          |
|            | <p><b>R<sub>f</sub></b>: 0.24 (Pet. ether /EtOAc = 80/20); <b>Yield</b>: 70 mg, 71%; White solid; <b>mp</b>: 120 °C; <b><sup>1</sup>H NMR</b> (500 MHz, CDCl<sub>3</sub>) <math>\delta</math>: 7.96 (4H, d, <i>J</i> = 8.0 Hz), 7.61 (1H, t, <i>J</i> = 7.4 Hz), 7.47 (2H, t, <i>J</i> = 7.6 Hz), 7.37 (1H, t, <i>J</i> = 7.2 Hz), 7.30 (1H, m), 7.24 (2H, d, <i>J</i> = 7.6 Hz), 7.16 (1H, m), 7.06 (1H, t, <i>J</i> = 9.2 Hz), 5.84 (1H, d, <i>J</i> = 6.5 Hz), 5.73 (1H, d, <i>J</i> = 6.5 Hz), 2.40 (3H, s); <b><sup>13</sup>C NMR</b> (126 MHz, CDCl<sub>3</sub>) <math>\delta</math>: 193.8, 164.2, 161.2, 159.2, 142.3, 134.2, 133.9, 129.7, 129.7, 129.1, 128.9, 128.7, 128.6, 128.1, 128.0, 124.6, 124.5, 123.9, 115.8, 115.6, 85.0, 67.5, 21.5; <b>HRMS</b> (ESI) calculated [M+H]<sup>+</sup> for C<sub>23</sub>H<sub>19</sub>NO<sub>2</sub>F: 360.1394, found: 360.1393.</p> |
| <p><b>(4-(2-bromophenyl)-2-(p-tolyl)-4,5-dihydrooxazol-5-yl)(phenyl)methanone (4w)</b></p>  |                                                                                                                                                                                                                                                                                                                                                                                                                                                                                                                                                                                                                                                                                                                                                                                                                                                                                          |
|          | <p><b>R<sub>f</sub></b>: 0.21 (Pet. ether /EtOAc = 80/20); <b>Yield</b>: 76 mg, 77%; White solid; <b>mp</b>: 116 °C; <b><sup>1</sup>H NMR</b> (200 MHz, CDCl<sub>3</sub>) <math>\delta</math>: 8.04 (d, <i>J</i> = 8.1 Hz, 3H), 7.59-7.48 (m, 3H), 7.40 (dd, <i>J</i> = 1.7, 6.1 Hz, 1H), 7.25-7.05 (m, 4H), 6.96-6.81 (m, 1H), 6.39 (d, <i>J</i> = 10.6 Hz, 1H), 6.26 (d, <i>J</i> = 10.7 Hz, 1H), 2.45 (s, 3H); <b><sup>13</sup>C NMR</b> (50 MHz, CDCl<sub>3</sub>) <math>\delta</math>: 199.3, 163.2, 143.5, 142.6, 134.2, 131.2, 130.5, 130.0, 129.2, 128.9, 128.7, 125.7, 123.8, 123.1, 86.5, 72.6, 21.6; <b>HRMS</b> (ESI) calculated [M+H]<sup>+</sup> for C<sub>23</sub>H<sub>19</sub>NO<sub>2</sub>Br : 420.0594, found: 420.0597.</p>                                                                                                                                         |

**(4-(2,4-difluorophenyl)-2-(p-tolyl)-4,5-dihydrooxazol-5-yl)(phenyl)methanone (4x)**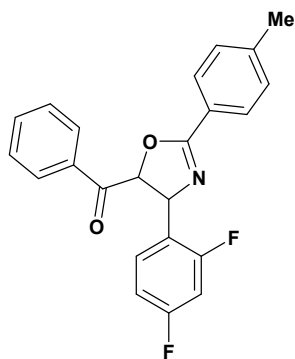

**Rf:** 0.24 (Pet. ether /EtOAc = 80/20); **Yield:** 73 mg, 74%;  
White solid; **mp:** 72 °C; **<sup>1</sup>H NMR** (500 MHz, CDCl<sub>3</sub>) δ: 8.02 (2H, d, *J* = 7.6 Hz), 7.59 (2H, d, *J* = 7.6 Hz), 7.51 (1H, t, *J* = 7.4 Hz), 7.31 (5H, m), 7.06 (1H, m), 6.69 (1H, m), 6.31 (1H, br. s.), 6.13 (1H, d, *J* = 11.1 Hz), 2.44 (3H, s); **<sup>13</sup>C NMR** (126 MHz, CDCl<sub>3</sub>) δ: 194.3, 166.0, 142.6, 135.1, 133.6, 130.8, 129.3, 128.8, 128.5, 127.7, 124.0, 111.6, 111.4, 102.9, 102.7, 102.5, 82.5, 66.0, 21.7; **HRMS** (ESI) calculated [M+H]<sup>+</sup> for C<sub>23</sub>H<sub>18</sub>NO<sub>2</sub>F<sub>2</sub>: 378.1300, found: 378.1298.

**(4-(2-chlorophenyl)-2-(p-tolyl)-4,5-dihydrooxazol-5-yl)(p-tolyl)methanone (4y)**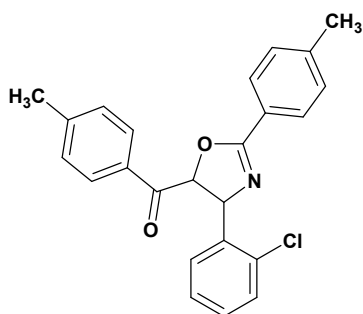

**Rf:** 0.28 (Pet. ether /EtOAc = 80/20); **Yield:** 69.4 mg, 70%;  
White solid; **mp:** 110 °C; **<sup>1</sup>H NMR** (200 MHz, CDCl<sub>3</sub>) δ: 8.00-7.83 (m, 4H), 7.45-7.32 (m, 2H), 7.32-7.28 (m, 2H), 7.27-7.20 (m, 4H), 6.09 (d, *J* = 6.2 Hz, 1H), 5.66 (d, *J* = 6.2 Hz, 1H), 2.43 (s, 3H), 2.41 (s, 3H); **<sup>13</sup>C NMR** (50 MHz, CDCl<sub>3</sub>) δ: 193.2, 164.2, 145.0, 142.4, 139.0, 132.7, 132.0, 129.7, 129.5, 129.2, 129.1, 128.9, 128.6, 127.3, 124.0, 84.5, 69.8, 21.8, 21.6; **HRMS** (ESI) calculated [M+H]<sup>+</sup> for C<sub>24</sub>H<sub>21</sub>NO<sub>2</sub>Cl : 390.1255, found: 390.1261.

**(4-chlorophenyl)(4-(2-chlorophenyl)-2-(p-tolyl)-4,5-dihydrooxazol-5-yl)methanone (4z)**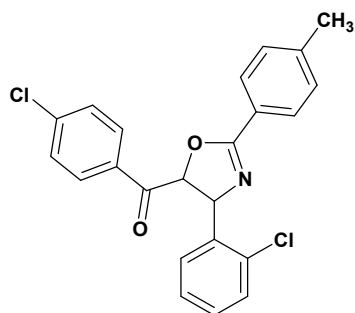

**Rf:** 0.25 (Pet. ether /EtOAc = 80/20); **Yield:** 72.8 mg, 73%;  
White solid; **mp:** 116 °C; **<sup>1</sup>H NMR** (200 MHz, CDCl<sub>3</sub>) δ: 7.98-7.88 (m, 4H), 7.50-7.42 (m, 2H), 7.42-7.34 (m, 2H), 7.29 (d, *J* = 2.3 Hz, 1H), 7.26-7.20 (m, 3H), 6.09 (d, *J* = 6.2 Hz, 1H), 5.60 (d, *J* = 6.2 Hz, 1H), 2.40 (s, 3H); **<sup>13</sup>C NMR** (50 MHz, CDCl<sub>3</sub>) δ: 192.2, 163.9, 142.4, 140.5, 139.0, 133.0,

|                                                                                                        |                                                                                                                                                                                                                                                                                                                                                                                                                                                                                                                                                                                                                                                                                                                                      |
|--------------------------------------------------------------------------------------------------------|--------------------------------------------------------------------------------------------------------------------------------------------------------------------------------------------------------------------------------------------------------------------------------------------------------------------------------------------------------------------------------------------------------------------------------------------------------------------------------------------------------------------------------------------------------------------------------------------------------------------------------------------------------------------------------------------------------------------------------------|
|                                                                                                        | 132.7, 130.5, 129.7, 129.2, 128.9, 128.7, 127.6, 127.4, 123.9, 84.5, 69.7, 21.7; <b>HRMS</b> (ESI) calculated $[M+H]^+$ for $C_{23}H_{18}NO_2Cl_2$ : 410.0709, found: 410.0714.                                                                                                                                                                                                                                                                                                                                                                                                                                                                                                                                                      |
| <b>(2-(2-bromo-4-methoxyphenyl)-4-phenyl-4,5-dihydrooxazol-5-yl)(4-isopropylphenyl)methanone (4za)</b> |                                                                                                                                                                                                                                                                                                                                                                                                                                                                                                                                                                                                                                                                                                                                      |
| 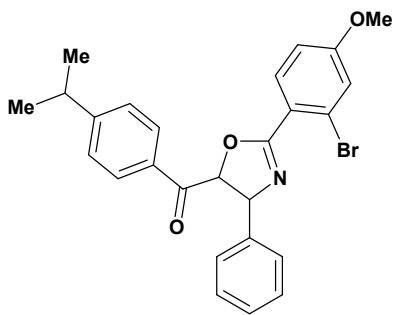                      | <b>R<sub>f</sub></b> : 0.24 (Pet. ether /EtOAc = 80/20); <b>Yield</b> : 77.9 mg, 79%;<br>White solid; <b>mp</b> : 76 °C; <b><sup>1</sup>H NMR</b> (200 MHz, CDCl <sub>3</sub> ) δ: 7.87 (d, <i>J</i> = 8.2 Hz, 2H), 7.39 (d, <i>J</i> = 8.7 Hz, 1H), 7.27-7.16 (m, 7H), 7.13 (d, <i>J</i> = 2.4 Hz, 1H), 6.79 (dd, <i>J</i> = 2.4, 8.7 Hz, 1H), 5.60-5.31 (m, 2H), 3.77 (s, 3H), 3.02-2.75 (m, 1H), 1.21 (s, 3H), 1.17 (s, 3H); <b><sup>13</sup>C NMR</b> (50 MHz, CDCl <sub>3</sub> ) δ: 197.8, 163.8, 162.2, 153.1, 141.4, 131.6, 129.6, 128.8, 128.7, 127.9, 126.6, 126.5, 124.3, 122.0, 119.7, 112.9, 88.0, 73.7, 55.7, 34.2, 23.7; <b>HRMS</b> (ESI) calculated $[M+H]^+$ for $C_{26}H_{25}NO_3Br$ : 478.1012, found: 478.1016. |
| <b>(2-bromo-4-methoxyphenyl)(4-phenyl-2-(p-tolyl)-4,5-dihydrooxazol-5-yl)methanone (4zb)</b>           |                                                                                                                                                                                                                                                                                                                                                                                                                                                                                                                                                                                                                                                                                                                                      |
|                     | <b>R<sub>f</sub></b> : 0.21 (Pet. ether /EtOAc = 80/20); <b>Yield</b> : 70 mg, 71%;<br>White solid; <b>mp</b> : 141 °C; <b><sup>1</sup>H NMR</b> (200 MHz, CDCl <sub>3</sub> ) δ: 7.87 (s, 1H), 7.75-7.85 (m, 1H), 7.46 (d, <i>J</i> = 8.6 Hz, 1H), 7.24-7.37 (m, 7H), 7.20 (d, <i>J</i> = 2.4 Hz, 1H), 6.85 (dd, <i>J</i> = 8.7, 2.5 Hz, 1H), 5.55 (q, <i>J</i> = 6.5 Hz, 2H), 3.83 (s, 3H), 2.38 (s, 3H); <b><sup>13</sup>C NMR</b> (50 MHz, CDCl <sub>3</sub> ) δ: 195.50, 161.9, 138.2, 136.79, 132.74, 131.83, 129.30, 128.37, 128.27, 128.2, 128.07, 126.7, 125.8, 121.2, 119, 112.9, 85.19, 73.39, 55.6, 21.2; <b>HRMS</b> (ESI) calculated $[M+H]^+$ for $C_{24}H_{21}NO_3Br$ : 450.0699, found: 450.0700.                   |
| <b>(2-bromo-4-methoxyphenyl)(2,4-diphenyl-4,5-dihydrooxazol-5-yl)methanone (4zc)</b>                   |                                                                                                                                                                                                                                                                                                                                                                                                                                                                                                                                                                                                                                                                                                                                      |

|                                                                                                             |                                                                                                                                                                                                                                                                                                                                                                                                                                                                                                                                                                                                                                                                                                                                                                                                                                                                  |
|-------------------------------------------------------------------------------------------------------------|------------------------------------------------------------------------------------------------------------------------------------------------------------------------------------------------------------------------------------------------------------------------------------------------------------------------------------------------------------------------------------------------------------------------------------------------------------------------------------------------------------------------------------------------------------------------------------------------------------------------------------------------------------------------------------------------------------------------------------------------------------------------------------------------------------------------------------------------------------------|
| 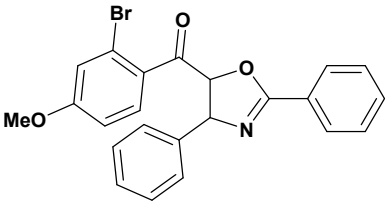                           | <p><b>R<sub>f</sub></b>: 0.25 (Pet. ether /EtOAc = 80/20); <b>Yield</b>: 74.2 mg, 75%;<br/> White solid; <b>mp</b>: 66 °C; <b><sup>1</sup>H NMR</b> (200 MHz, CDCl<sub>3</sub>) δ: 8.0 (dd, <i>J</i> = 8.15, 1.45 Hz, 2H), 7.4-7.5 (m, 4H), 7.4 (dd, <i>J</i> = 7.26, 1.71 Hz, 2H), 7.2-7.3 (m, 4H), 6.9 (dd, <i>J</i> = 8.65, 2.46 Hz, 1H), 5.5-5.6 (m, 2H), 3.8 (s, 3H); <b><sup>13</sup>C NMR</b> (50 MHz, CDCl<sub>3</sub>) δ: 197.7, 163.8, 162.3, 141.3, 131.8, 131.6, 129.6, 128.8, 128.6, 128.4, 127.9, 126.8, 126.7, 122.0, 119.8, 113.0, 88.1, 73.8, 55.7; <b>HRMS</b> (ESI) calculated [M+H]<sup>+</sup> for C<sub>23</sub>H<sub>19</sub>NO<sub>3</sub>Br: 436.0543, found: 436.0540.</p>                                                                                                                                                             |
| <p><b>(2-bromo-4-methoxyphenyl)(4-(naphthalen-1-yl)-2-phenyl-4,5-dihydrooxazol-5-yl)methanone (4zd)</b></p> |                                                                                                                                                                                                                                                                                                                                                                                                                                                                                                                                                                                                                                                                                                                                                                                                                                                                  |
|                          | <p><b>R<sub>f</sub></b>: 0.27 (Pet. ether /EtOAc = 80/20); <b>Yield</b>: 79.7 mg, 81%;<br/> White solid; <b>mp</b>: 64 °C; <b><sup>1</sup>H NMR</b> (200 MHz, CDCl<sub>3</sub>) δ: 8.2 (d, <i>J</i> = 7.20 Hz, 1H), 8.0 (d, <i>J</i> = 8.21 Hz, 1H), 7.9-8.0 (m, 1H), 7.5-7.6 (m, 3H), 7.5 (d, <i>J</i> = 3.28 Hz, 1H), 7.4 (s, 5H), 7.2 (d, <i>J</i> = 2.40 Hz, 1H), 6.9 (dd, <i>J</i> = 8.59, 2.40 Hz, 1H), 5.7 (d, <i>J</i> = 6.32 Hz, 1H), 5.6 (d, <i>J</i> = 6.19 Hz, 1H), 3.9 (s, 3H); <b><sup>13</sup>C NMR</b> (50 MHz, CDCl<sub>3</sub>) δ: 198.1, 163.7, 162.3, 141.5, 133.7, 132.5, 131.7, 131.3, 129.8, 129.8, 128.9, 128.5, 128.0, 127.6, 126.7, 126.4, 126.2, 124.6, 123.4, 122.1, 119.8, 113.1, 87.1, 74.6, 55.8; <b>HRMS</b> (ESI) calculated [M+H]<sup>+</sup> for C<sub>27</sub>H<sub>21</sub>NO<sub>3</sub>Br: 486.0699, found: 486.0702.</p> |
| <p><b>(2-(4-bromophenyl)-4-phenyl-4,5-dihydrooxazol-5-yl)(p-tolyl)methanone (4ze)</b></p>                   |                                                                                                                                                                                                                                                                                                                                                                                                                                                                                                                                                                                                                                                                                                                                                                                                                                                                  |

|                                                                                     |                                                                                                                                                                                                                                                                                                                                                                                                                                                                                                                                                                                                                                                                                     |
|-------------------------------------------------------------------------------------|-------------------------------------------------------------------------------------------------------------------------------------------------------------------------------------------------------------------------------------------------------------------------------------------------------------------------------------------------------------------------------------------------------------------------------------------------------------------------------------------------------------------------------------------------------------------------------------------------------------------------------------------------------------------------------------|
| 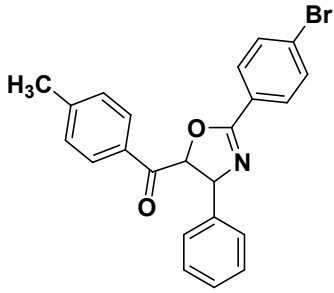   | <p><b>R<sub>f</sub></b>: 0.22 (Pet. ether /EtOAc = 30/70); <b>Yield</b>: 48 mg, 69 %;</p> <p>White Solid; <b>mp</b>: 81 °C; <sup>1</sup>H NMR (500 MHz, CDCl<sub>3</sub>) δ: 7.96 (2H, m, <i>J</i> = 8.4 Hz), 7.82 (2H, d, <i>J</i> = 8.4 Hz), 7.60 (2H, m, <i>J</i> = 8.4 Hz), 7.33-7.45 (3H, m), 7.29 (4H, t, <i>J</i> = 8.0 Hz), 5.67 (1H, d, <i>J</i> = 6.9 Hz), 5.49 (1H, d, <i>J</i> = 6.5 Hz), 2.45 (3H, s); <sup>13</sup>C NMR (126 MHz, CDCl<sub>3</sub>) δ: 193.5, 163.0, 145.0, 140.9, 131.8, 131.7, 130.3, 129.6, 129.2, 129.0, 128.2, 127.0, 126.6, 126.0, 86.8, 73.7, 21.8; LCMS (ES<sup>+</sup>) <i>m/z</i> = 422.0 ([M + H]<sup>+</sup>, <i>tr</i> = 1.60 min).</p> |
| <b>N-(1,3-diphenylpropyl)-4-methylbenzamide (5a)</b>                                |                                                                                                                                                                                                                                                                                                                                                                                                                                                                                                                                                                                                                                                                                     |
|  | <p><b>R<sub>f</sub></b>: 0.22 (Pet. ether /EtOAc = 30/70); <b>Yield</b>: 91 mg, 95%;</p> <p>White Solid; <b>mp</b>: 160; <sup>1</sup>H NMR (500 MHz, CDCl<sub>3</sub>) δ: 7.59 (d, <i>J</i> = 7.6 Hz, 2H), 7.37 (d, <i>J</i> = 4.2 Hz, 4H), 7.29 (m, 3H), 7.20 (m, 5H), 5.25 (q, <i>J</i> = 6.9 Hz, 1H), 2.69 (m, 2H), 2.39 (s, 3H), 2.32 (m, 1H), 2.24 (m, 1H); <sup>13</sup>C NMR (50 MHz, CDCl<sub>3</sub>) δ: 199.3, 163.9, 142.6, 141.1, 138.1, 132.8, 131.2, 130.4, 129.2, 128.9, 128.5, 128.1, 127.3, 126.6, 123.7, 88.7, 73.8, 21.6; <b>HRMS</b> (ESI) calculated [M+H]<sup>+</sup> for C<sub>23</sub>H<sub>24</sub>NO: 330.1852, found: 330.1847.</p>                      |
| <b>Phenyl(4-phenyl-2-(p-tolyl)oxazol-5-yl)methanone (6a)</b>                        |                                                                                                                                                                                                                                                                                                                                                                                                                                                                                                                                                                                                                                                                                     |
|  | <p><b>R<sub>f</sub></b>: 0.35 (Pet. ether /EtOAc = 90/10); <b>Yield</b>: 84 mg, 86%;</p> <p>White Solid ; <sup>1</sup>H NMR (500 MHz, CDCl<sub>3</sub>) δ: 8.08 (4H, m), 7.97 (2H, d, <i>J</i> = 7.6 Hz), 7.59 (1H, t, <i>J</i> = 7.4 Hz), 7.48 (2H, t, <i>J</i> = 7.8 Hz), 7.43 (3H, m), 7.33 (3H, d, <i>J</i> = 8.0 Hz), 2.45 (3H, s); <sup>13</sup>C NMR (125 MHz, CDCl<sub>3</sub>) δ: 183.1, 162.2, 148.9, 143.3, 142.4, 137.6, 132.8, 130.7, 129.8, 129.7, 129.6, 129.3, 128.3, 128.2, 127.4, 123.6, 21.7; <b>HRMS</b> (ESI) calculated</p>                                                                                                                                   |

|                                                                                     |                                                                                                                                                                                                                                                                                                                                                                                                                                                                                                                                                                                                                                                                                                                            |
|-------------------------------------------------------------------------------------|----------------------------------------------------------------------------------------------------------------------------------------------------------------------------------------------------------------------------------------------------------------------------------------------------------------------------------------------------------------------------------------------------------------------------------------------------------------------------------------------------------------------------------------------------------------------------------------------------------------------------------------------------------------------------------------------------------------------------|
|                                                                                     | [M+H] <sup>+</sup> for C <sub>23</sub> H <sub>18</sub> O <sub>2</sub> N: 340.1332, found: 340.1333.                                                                                                                                                                                                                                                                                                                                                                                                                                                                                                                                                                                                                        |
| <b>(5-bromothiophen-2-yl)(4-phenyl-2-(p-tolyl)oxazol-5-yl)methanone (6b)</b>        |                                                                                                                                                                                                                                                                                                                                                                                                                                                                                                                                                                                                                                                                                                                            |
| 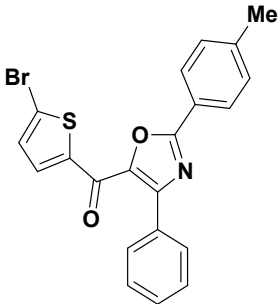   | <b>R<sub>f</sub></b> : 0.30 (Pet. ether /EtOAc = 90/10); <b>Yield</b> : 76 mg, 78%;<br>White Solid ; <b><sup>1</sup>H NMR</b> (500 MHz, CDCl <sub>3</sub> ) δ: 8.26 (d, <i>J</i> = 4.2 Hz, 1H), 8.11 (m, <i>J</i> = 7.6 Hz, 2H), 8.04 (m, <i>J</i> = 8.0 Hz, 2H), 7.65 (t, <i>J</i> = 7.2 Hz, 1H), 7.57 (t, <i>J</i> = 7.4 Hz, 2H), 7.33 (d, <i>J</i> = 7.6 Hz, 2H), 7.17 (d, <i>J</i> = 3.8 Hz, 1H), 2.45 (s, 3H); <b><sup>13</sup>C NMR</b> (125 MHz, CDCl <sub>3</sub> ) δ: 181.9, 162.0, 142.8, 137.5, 135.1, 132.8, 131.2, 130.8, 129.8, 129.5, 128.5, 127.6, 123.2, 117.6, 21.7; <b>HRMS</b> (ESI) calculated [M+H] <sup>+</sup> for C <sub>21</sub> H <sub>15</sub> O <sub>2</sub> NBrS: 424.0001, found: 424.0002. |
| <b>(4-(3-bromophenyl)-2-(p-tolyl)oxazol-5-yl)(phenyl)methanone (6c)</b>             |                                                                                                                                                                                                                                                                                                                                                                                                                                                                                                                                                                                                                                                                                                                            |
|  | <b>R<sub>f</sub></b> : 0.30 (Pet. ether /EtOAc = 90/10); <b>Yield</b> : 72 mg, 76%;<br>White Solid ; <b><sup>1</sup>H NMR</b> (500 MHz, CDCl <sub>3</sub> ) δ: 8.08 (3H, m), 7.87 (1H, d, <i>J</i> = 7.6 Hz), 7.70 (1H, d, <i>J</i> = 8.0 Hz), 7.43 (3H, m), 7.34 (3H, m), 7.26 (2H, s), 2.45 (3H, s); <b><sup>13</sup>C NMR</b> (101 MHz, CDCl <sub>3</sub> ) δ: 181.3, 162.6, 149.7, 142.9, 142.6, 139.4, 135.5, 132.6, 130.5, 130.1, 129.9, 129.8, 129.4, 128.3, 128.0, 127.5, 123.4, 122.5, 21.7; <b>HRMS</b> (ESI) calculated [M+H] <sup>+</sup> for C <sub>23</sub> H <sub>17</sub> O <sub>2</sub> NBr : 418.0437, found 418.0437.                                                                                   |



## 4. NMR Spectra

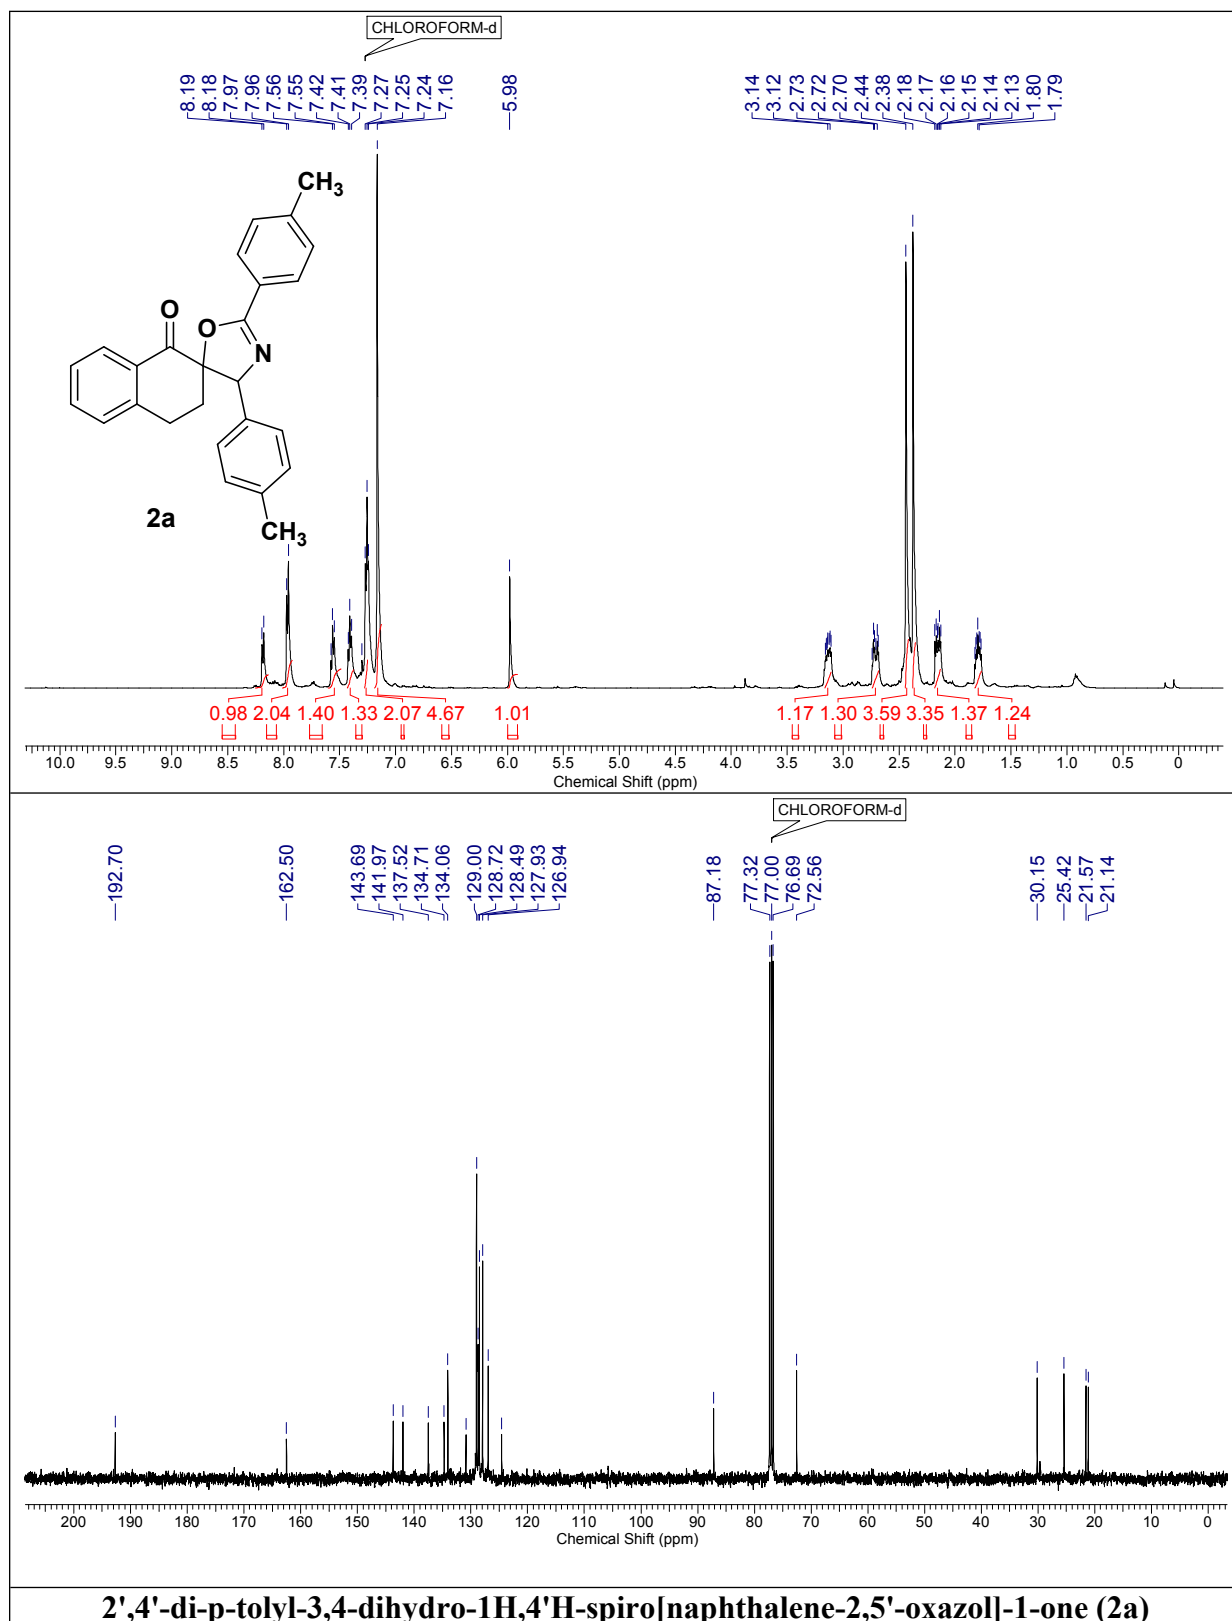

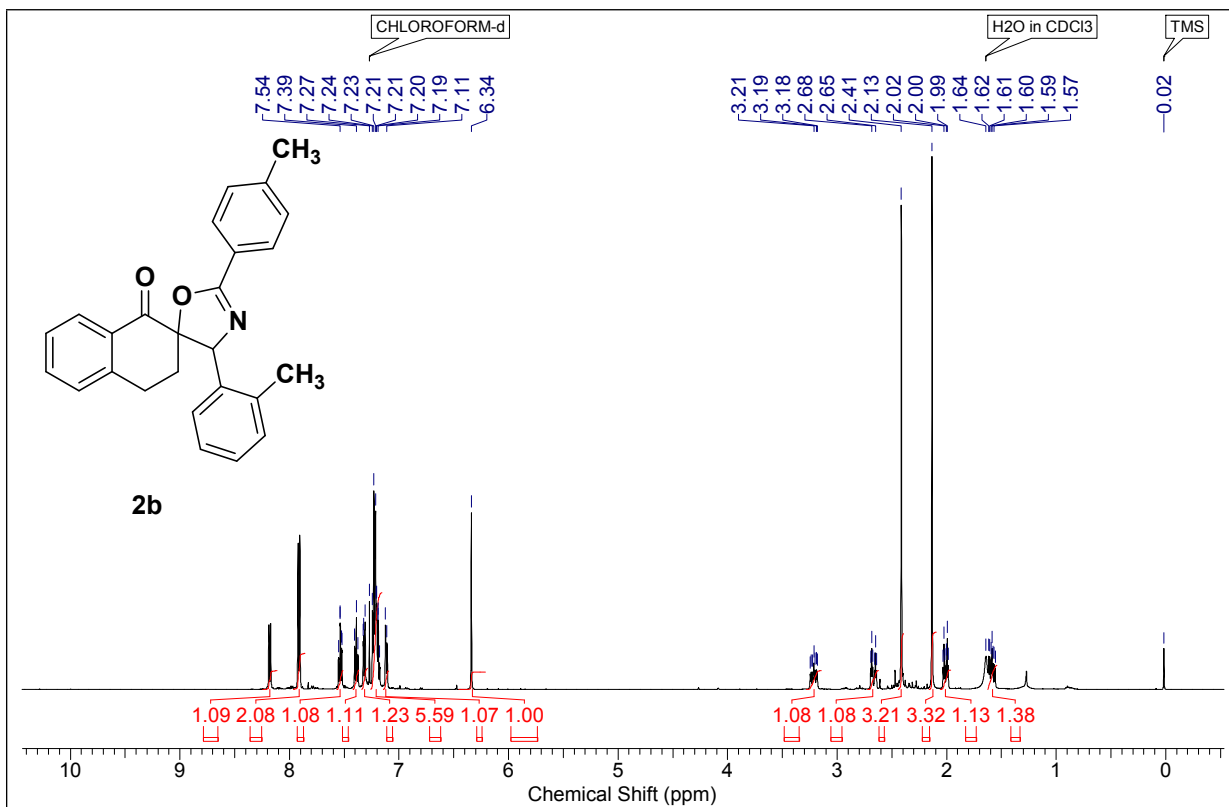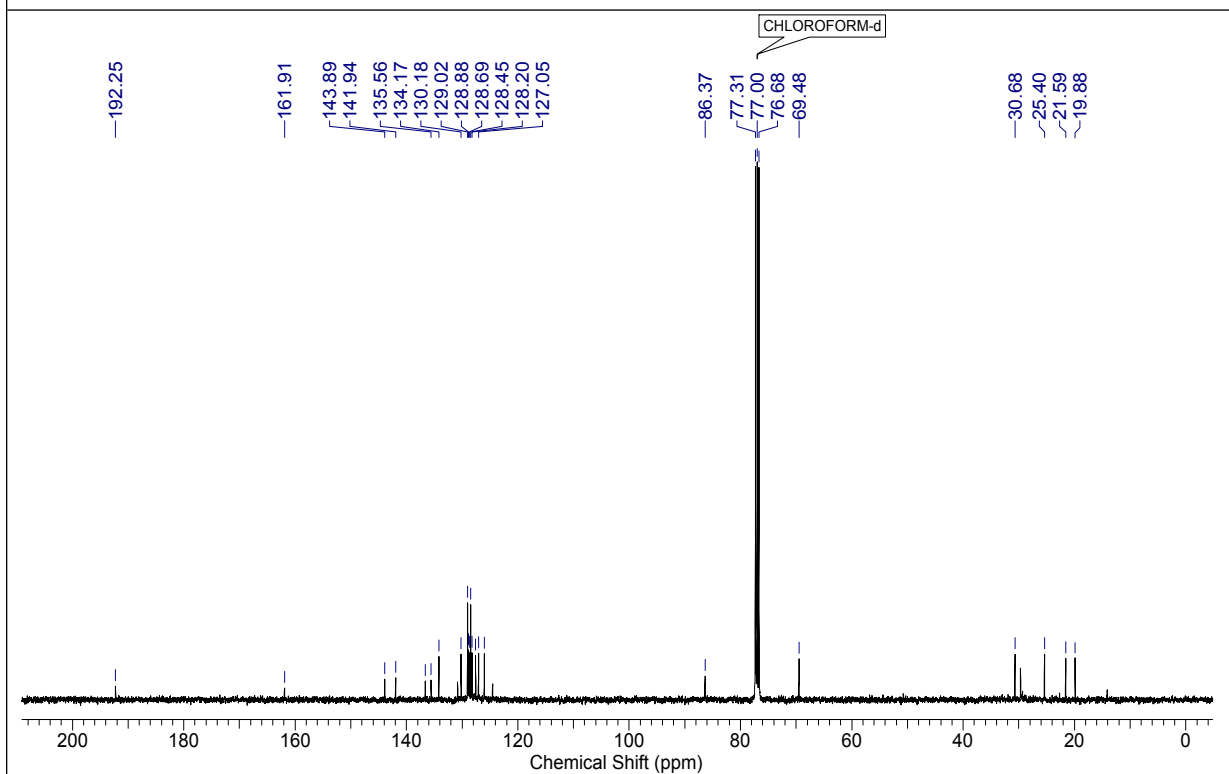

4'-(o-tolyl)-2'-(p-tolyl)-3,4-dihydro-1H,4'H-spiro[naphthalene-2,5'-oxazol]-1-one (2b)

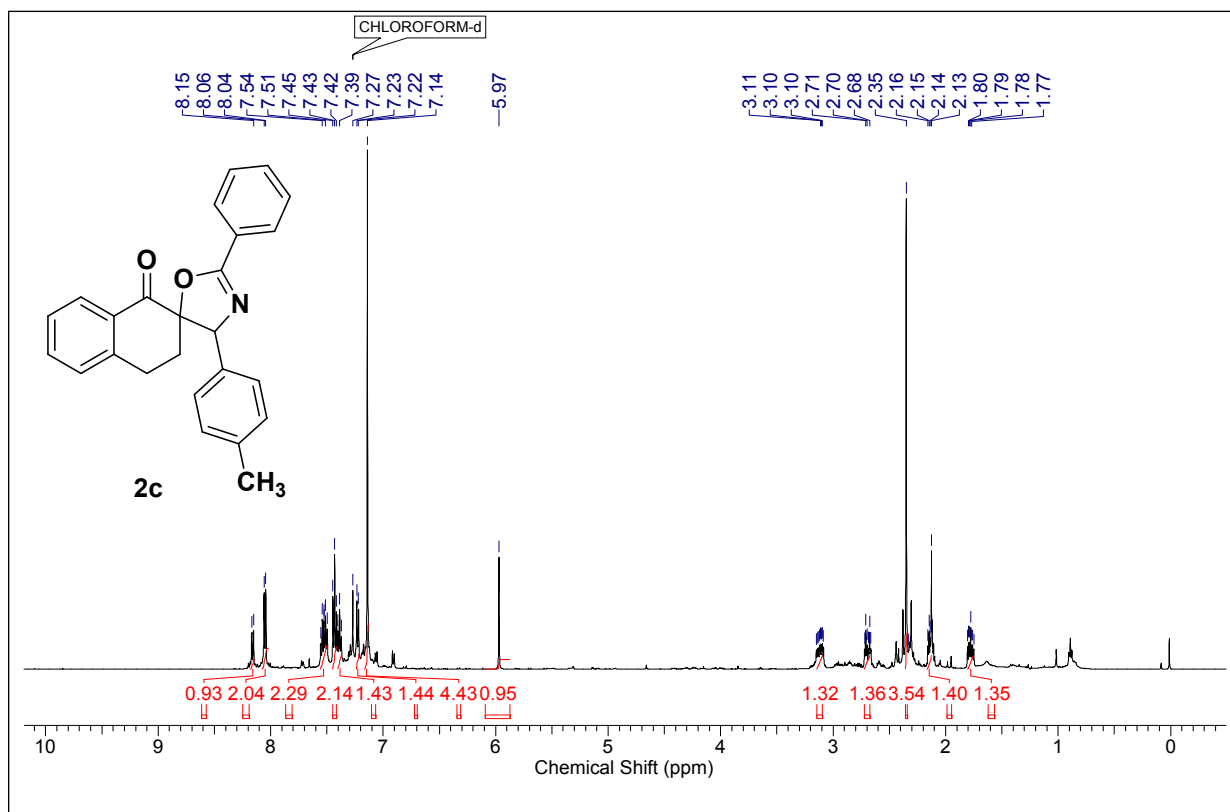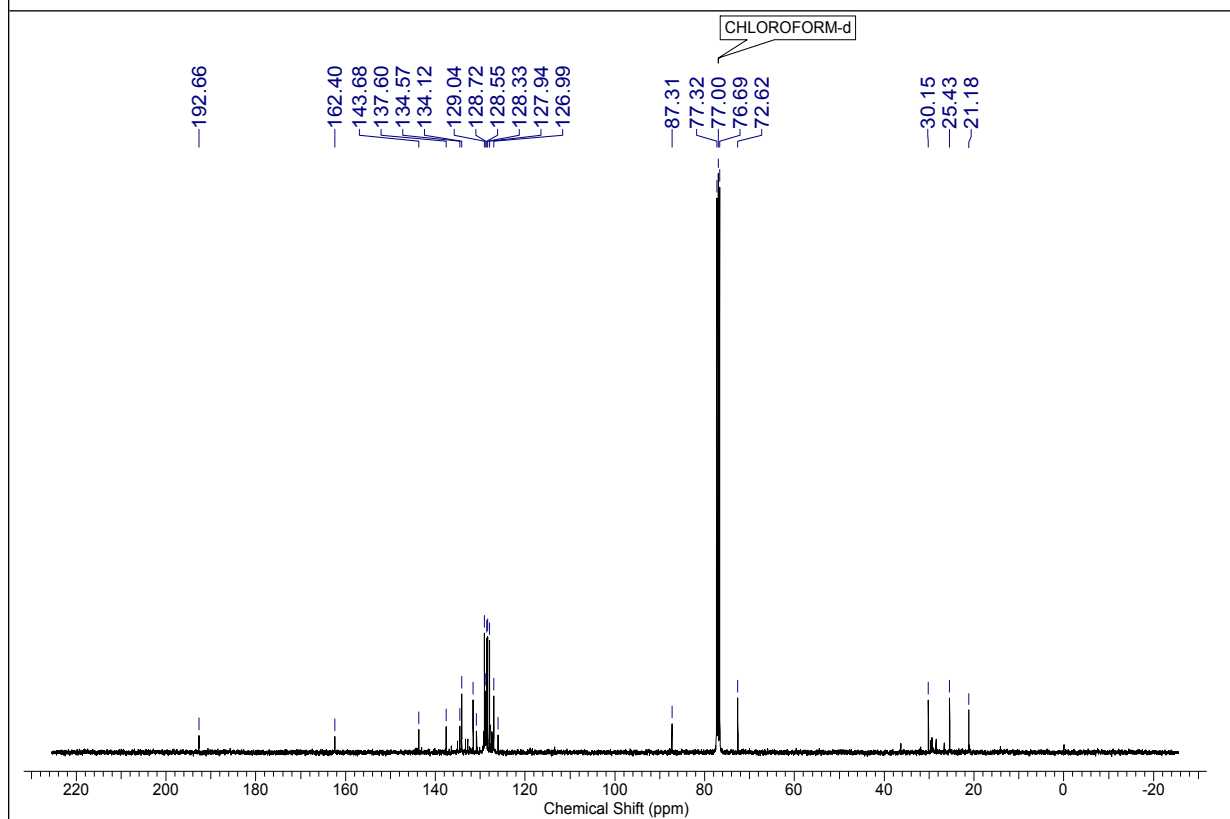

**2'-phenyl-4'-(p-tolyl)-3,4-dihydro-1H,4'H-spiro[naphthalene-2,5'-oxazol]-1-one (2c)**

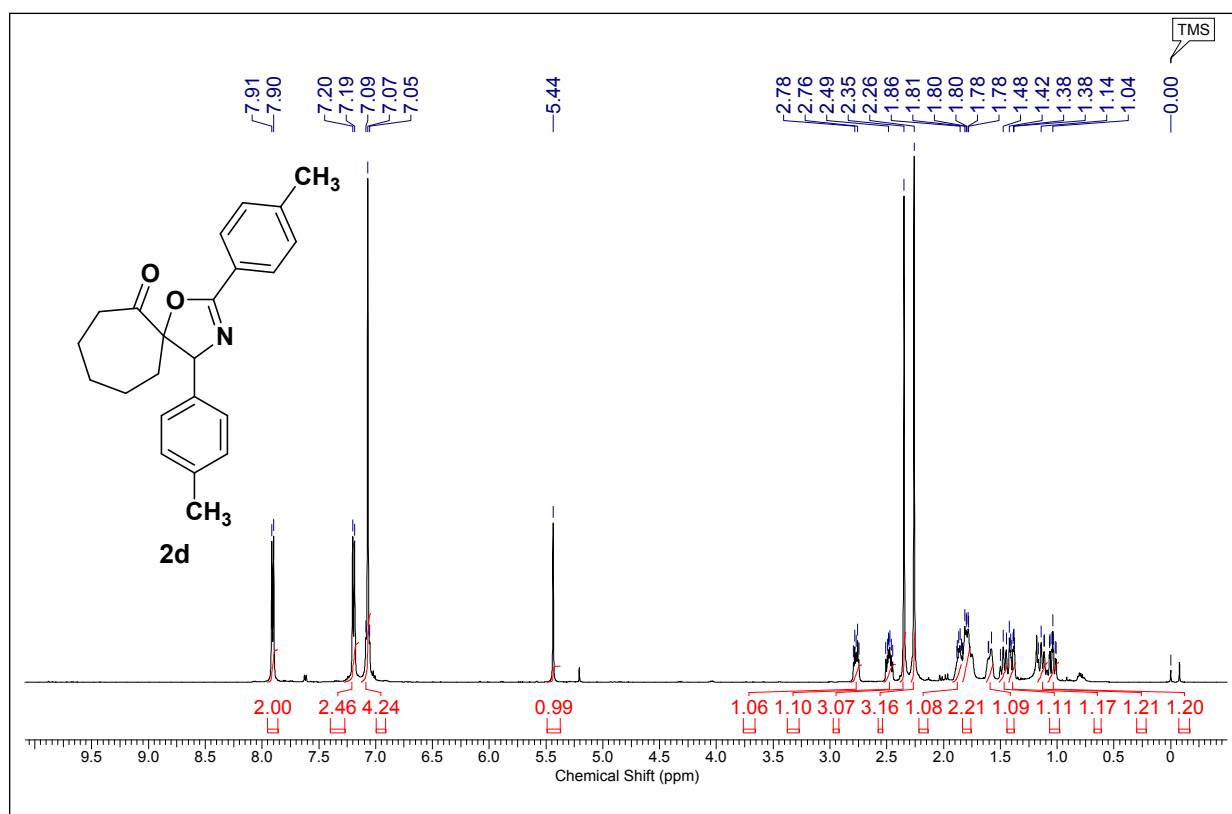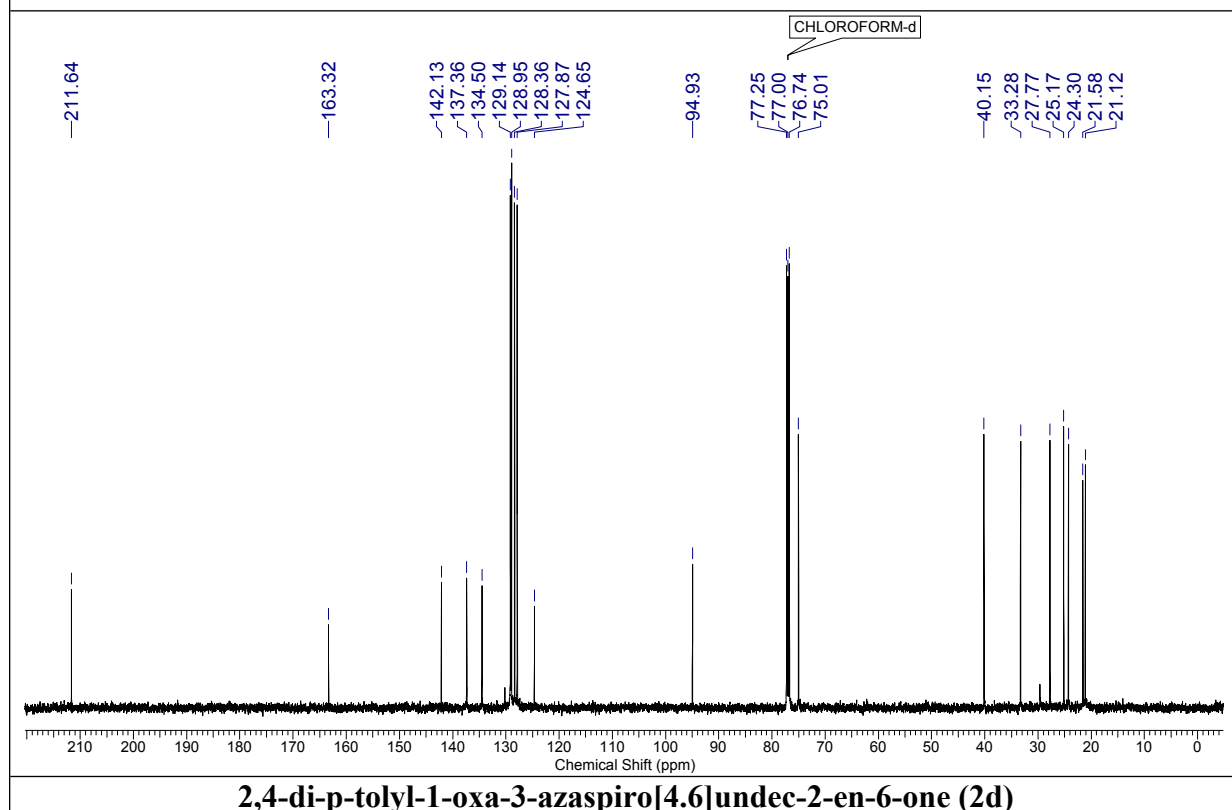

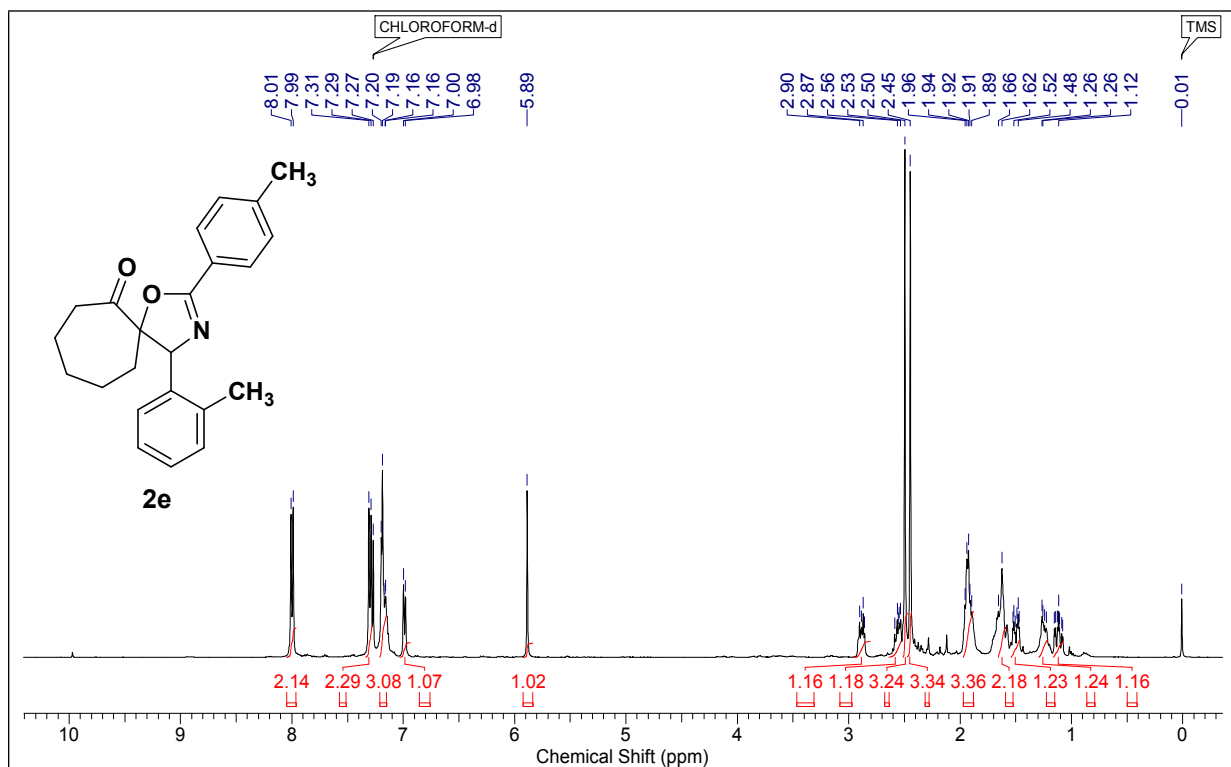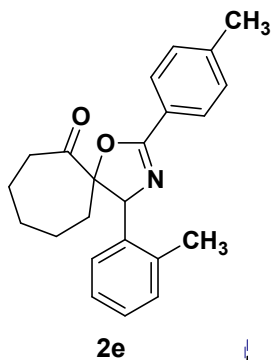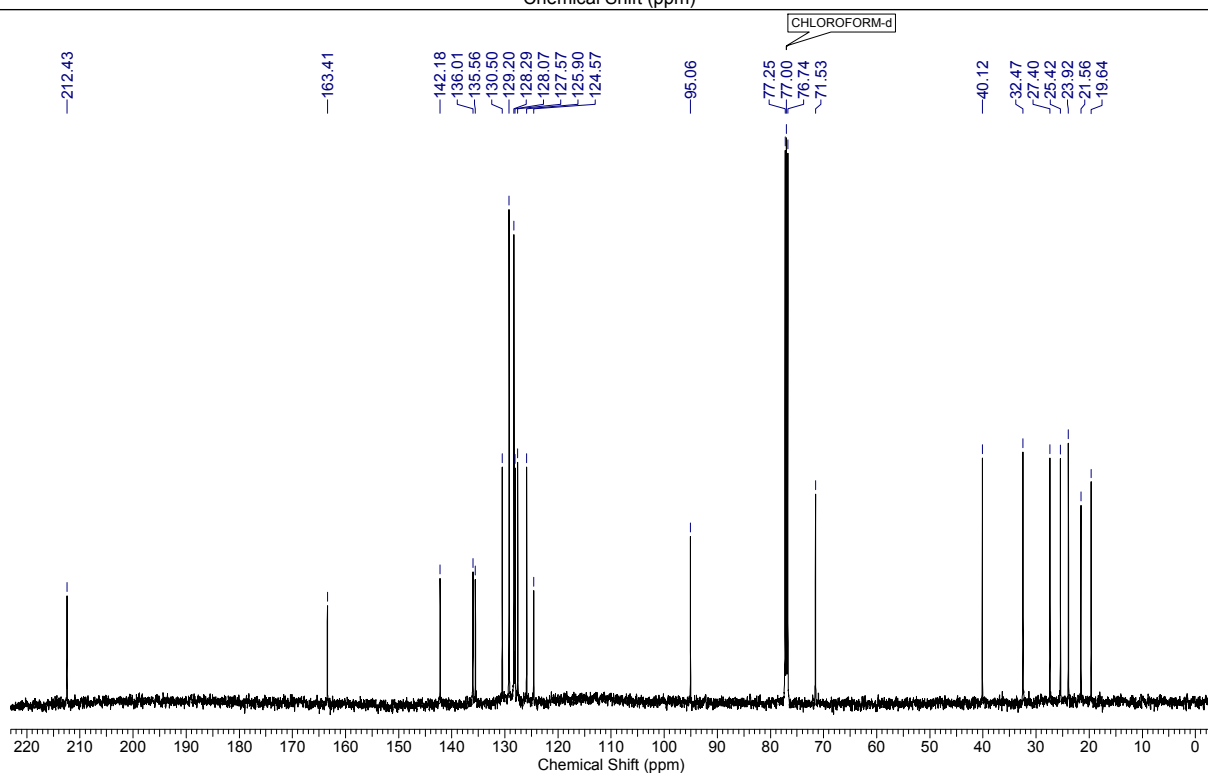

**4-(o-tolyl)-2-(p-tolyl)-1-oxa-3-azaspiro[4.6]undec-2-en-6-one (2e)**

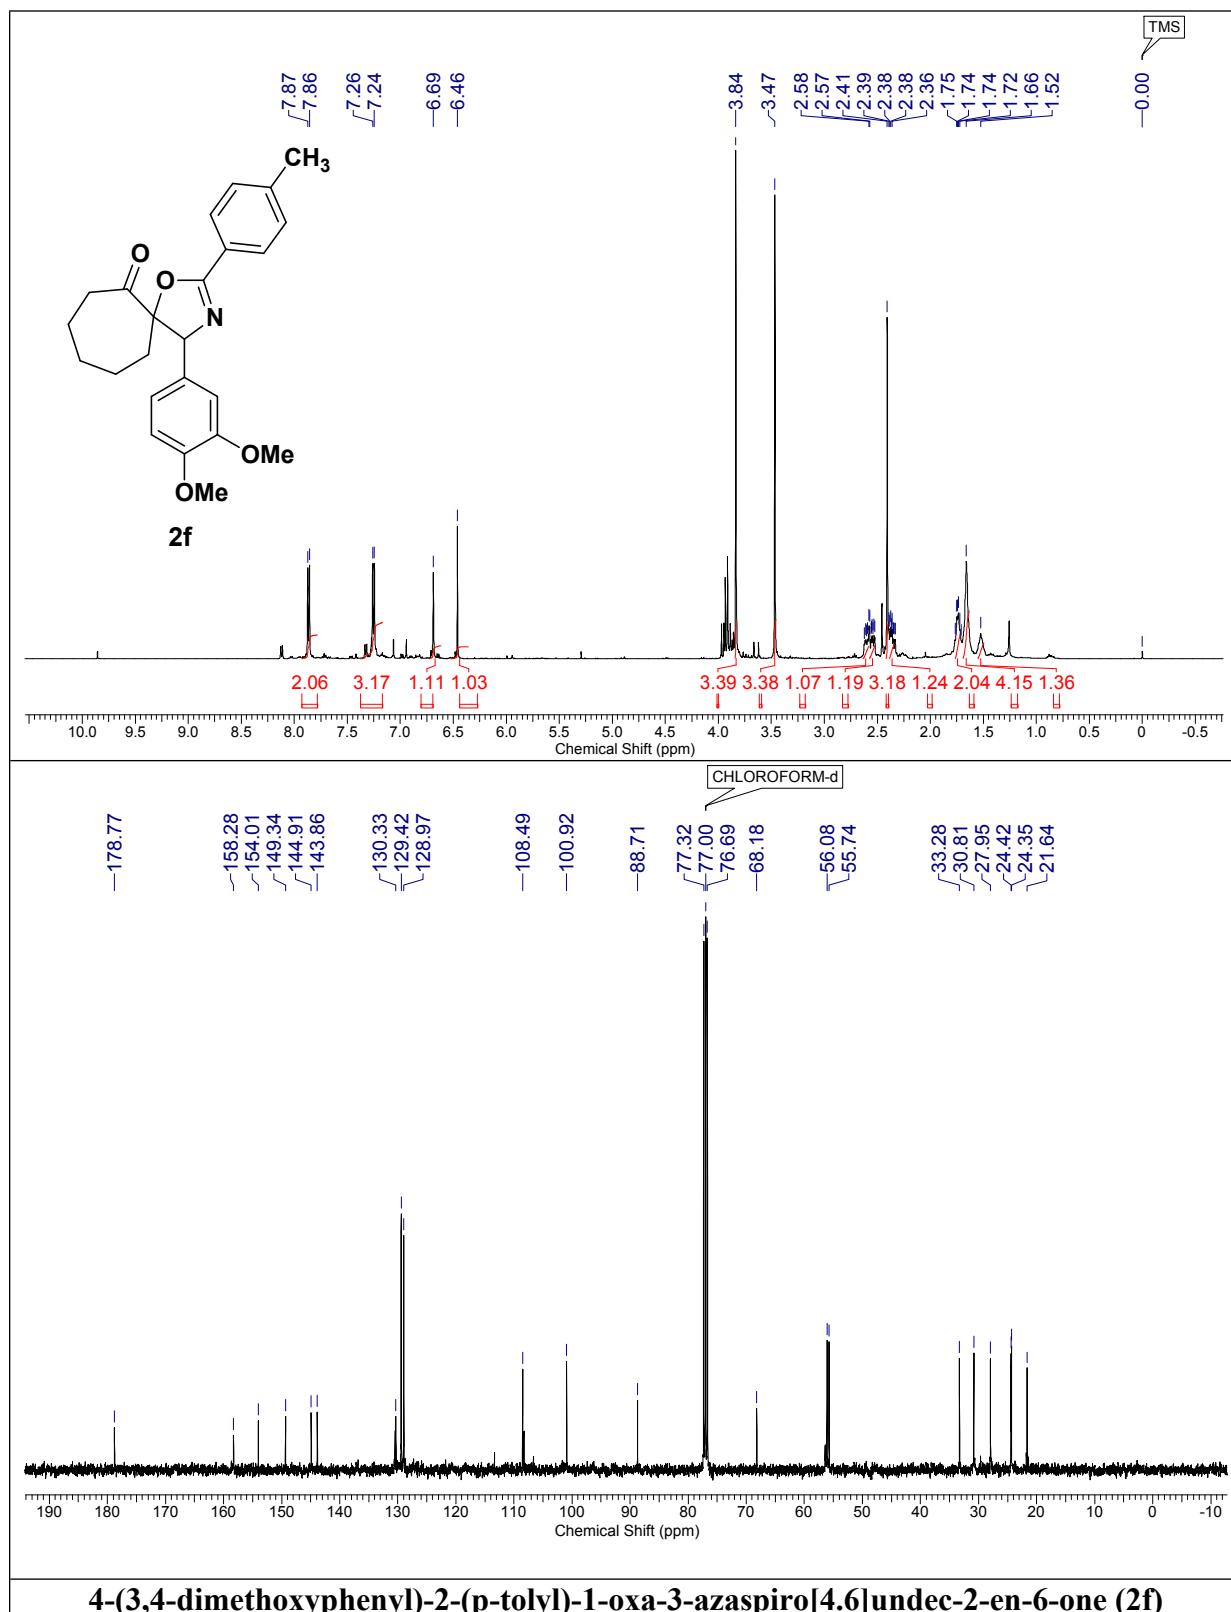

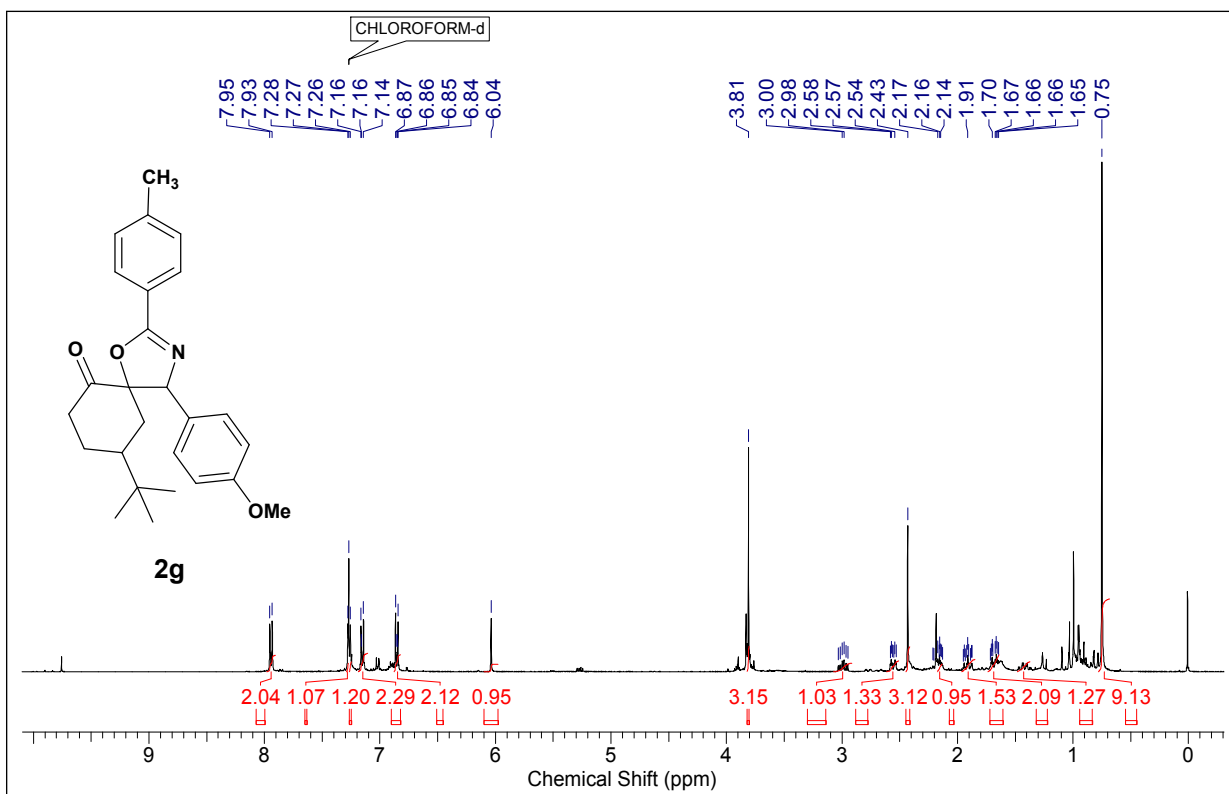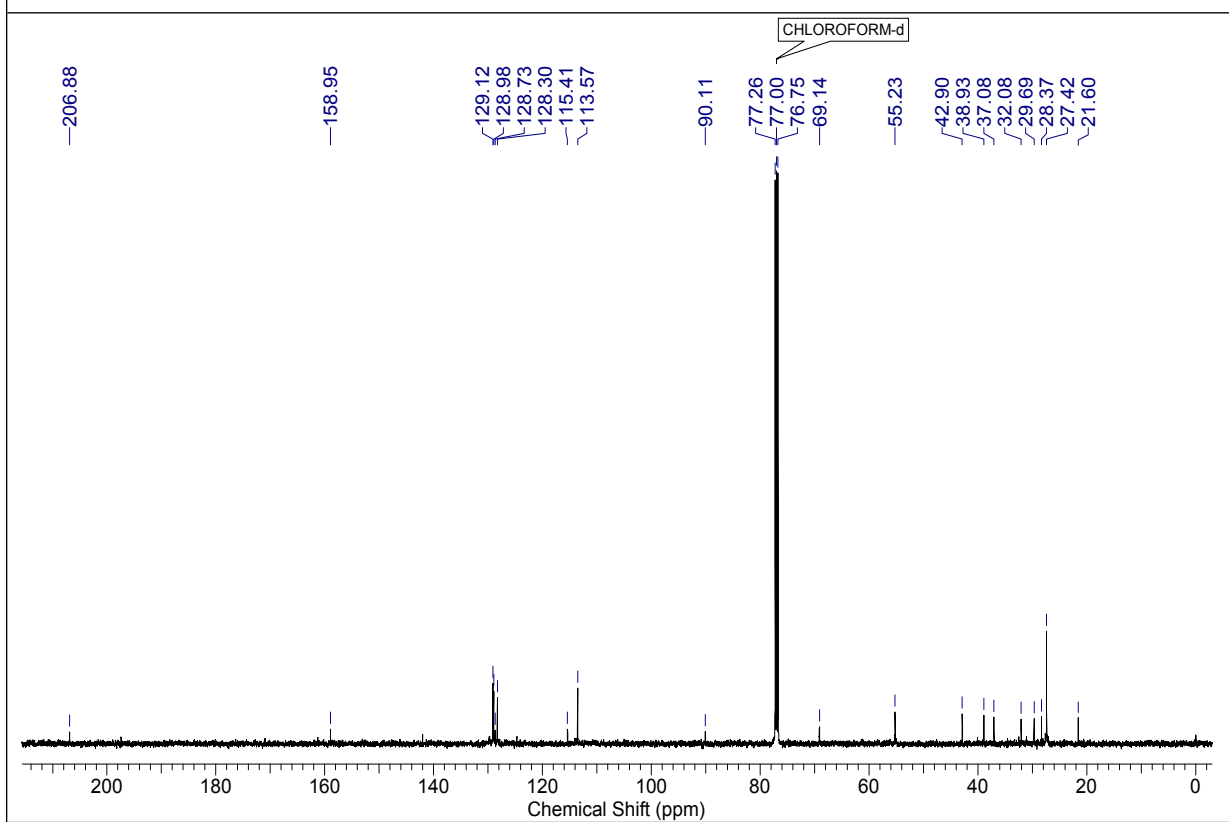

**9-(tert-butyl)-4-(4-methoxyphenyl)-2-(p-tolyl)-1-oxa-3-azaspiro[4.5]dec-2-en-6-one (2g)**

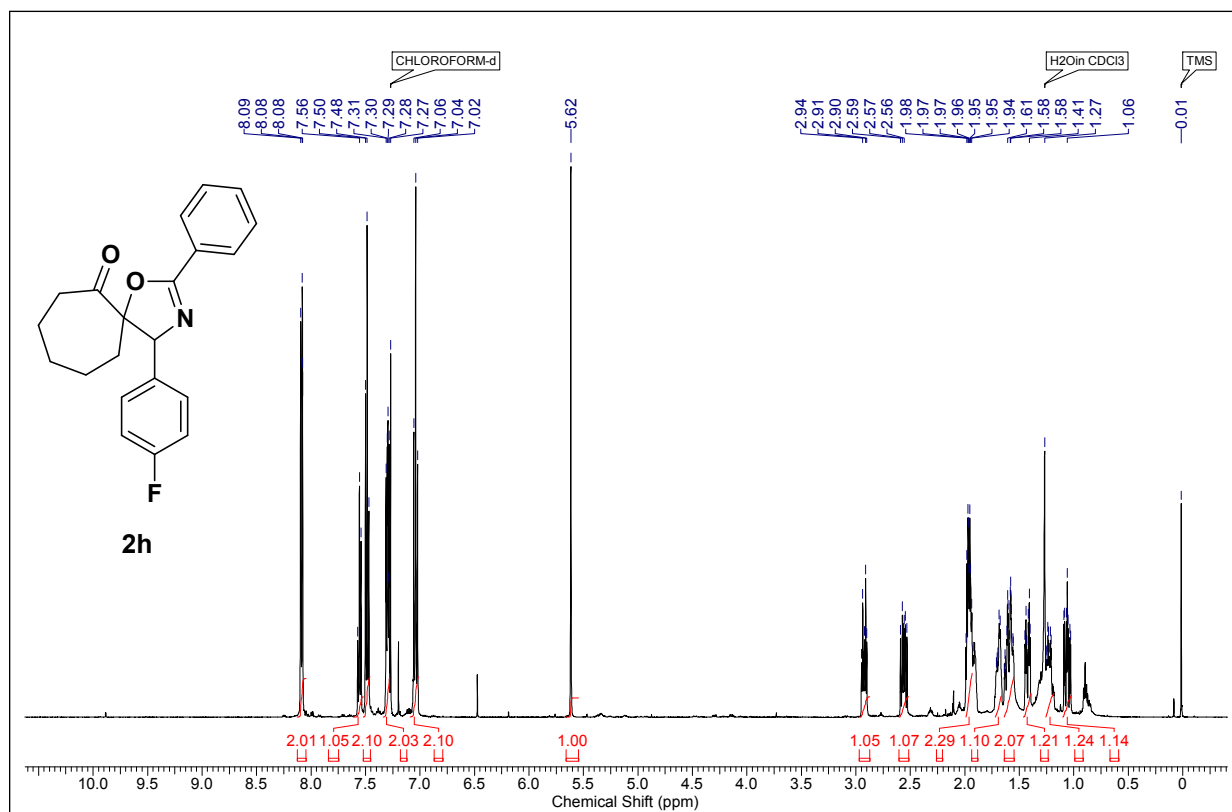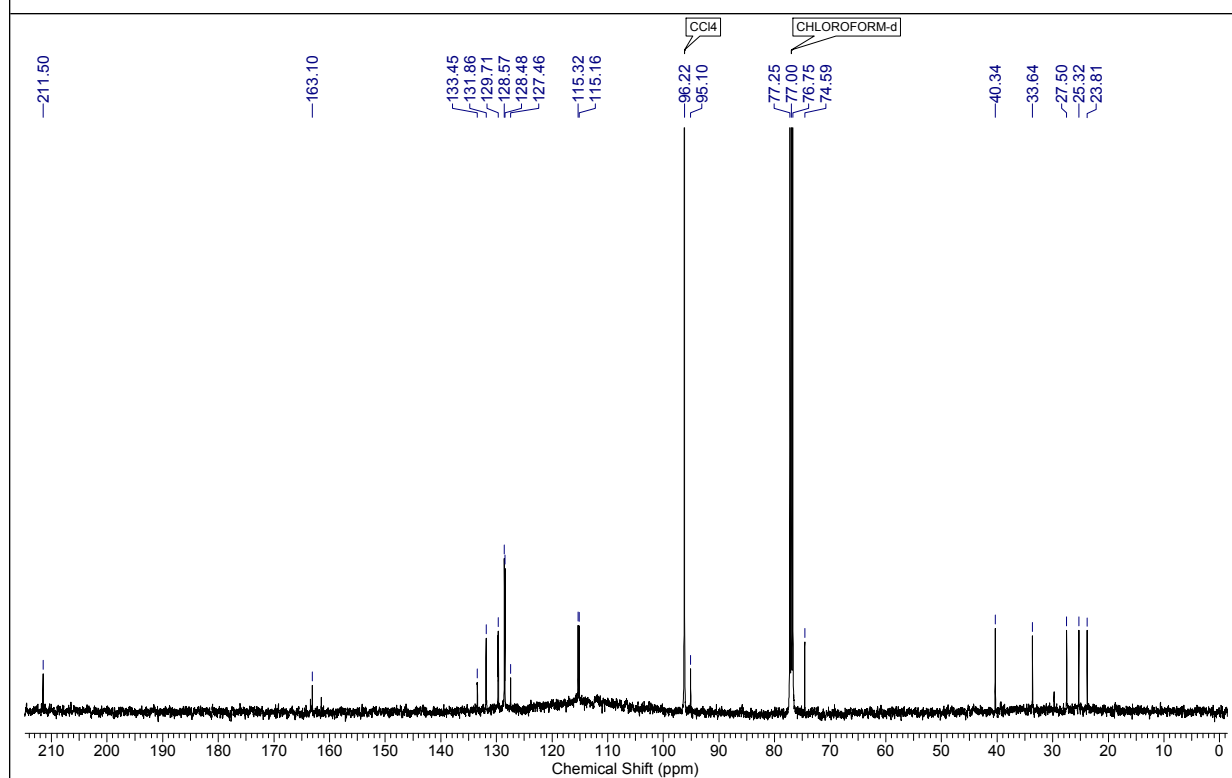

**4-(4-fluorophenyl)-2-phenyl-1-oxa-3-azaspiro[4.6]undec-2-en-6-one (2h)**



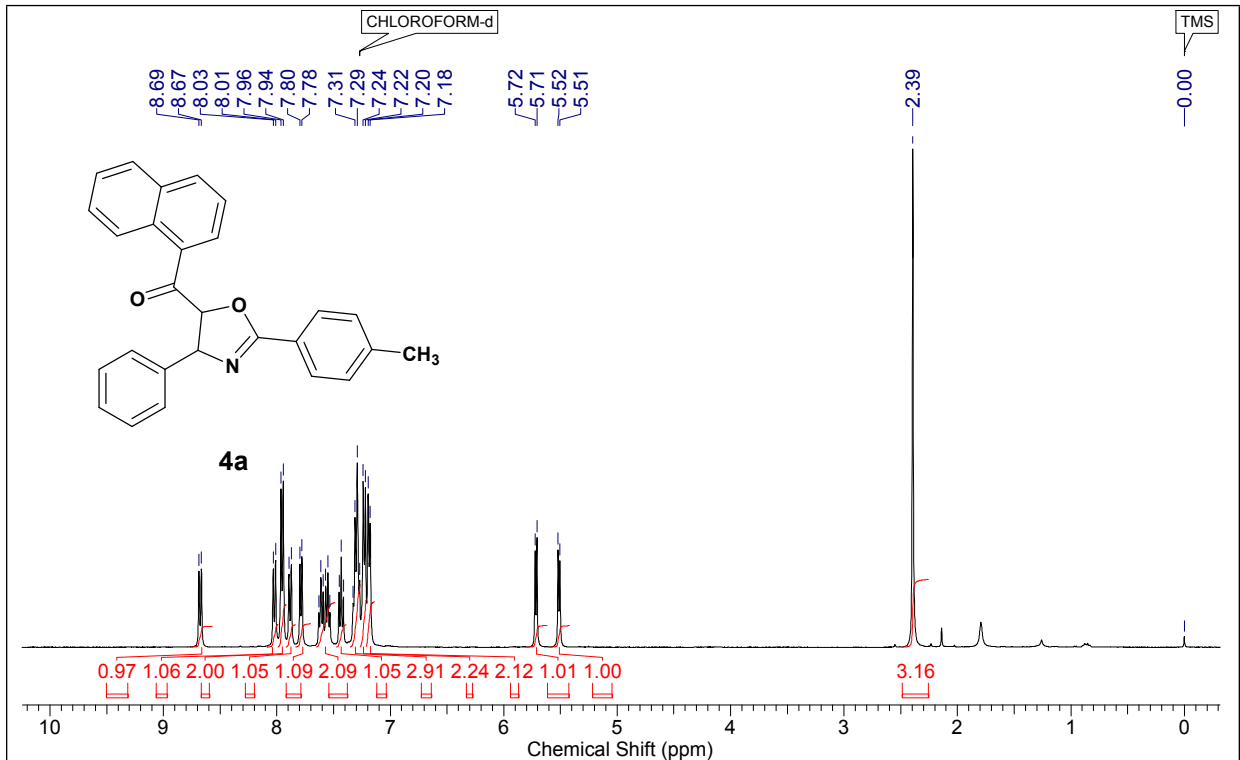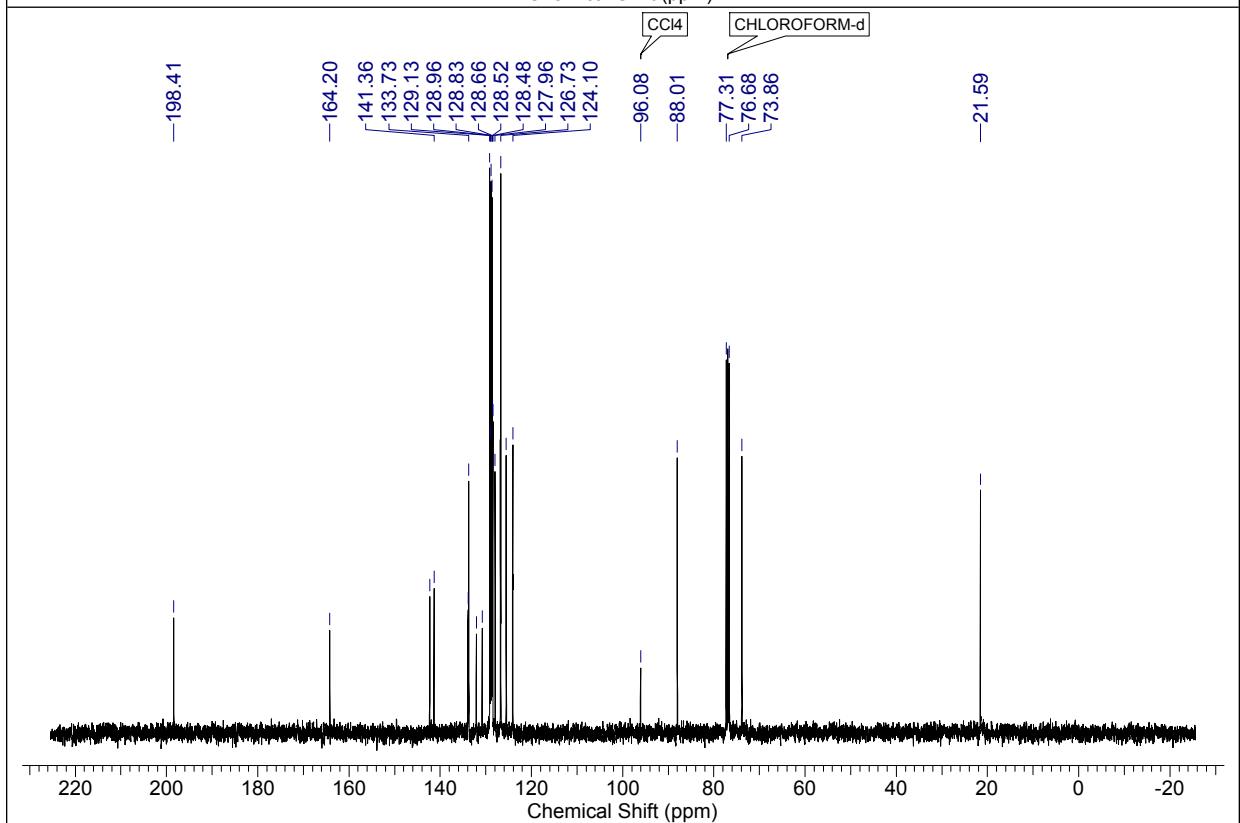

**Naphthalen-1-yl(4-phenyl-2-(p-tolyl)-4,5-dihydrooxazol-5-yl)methanone (4a)**

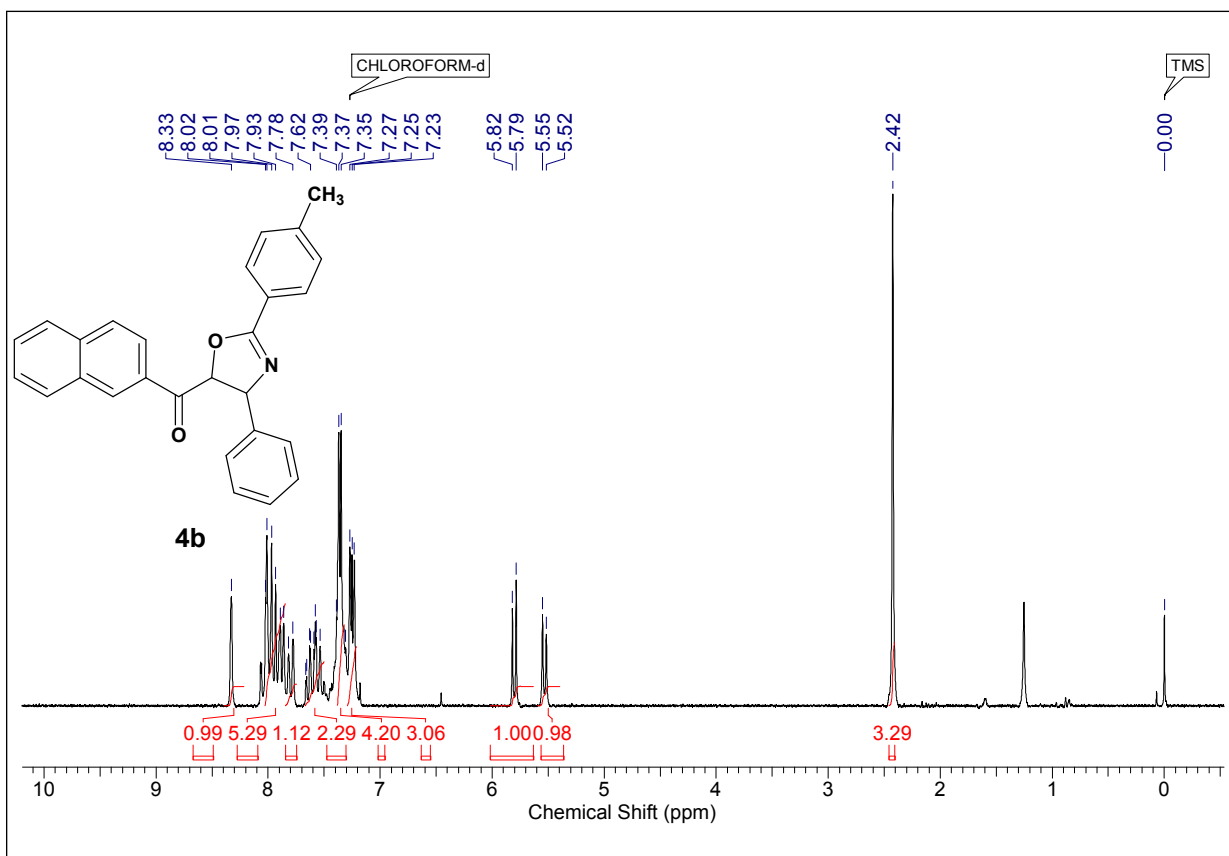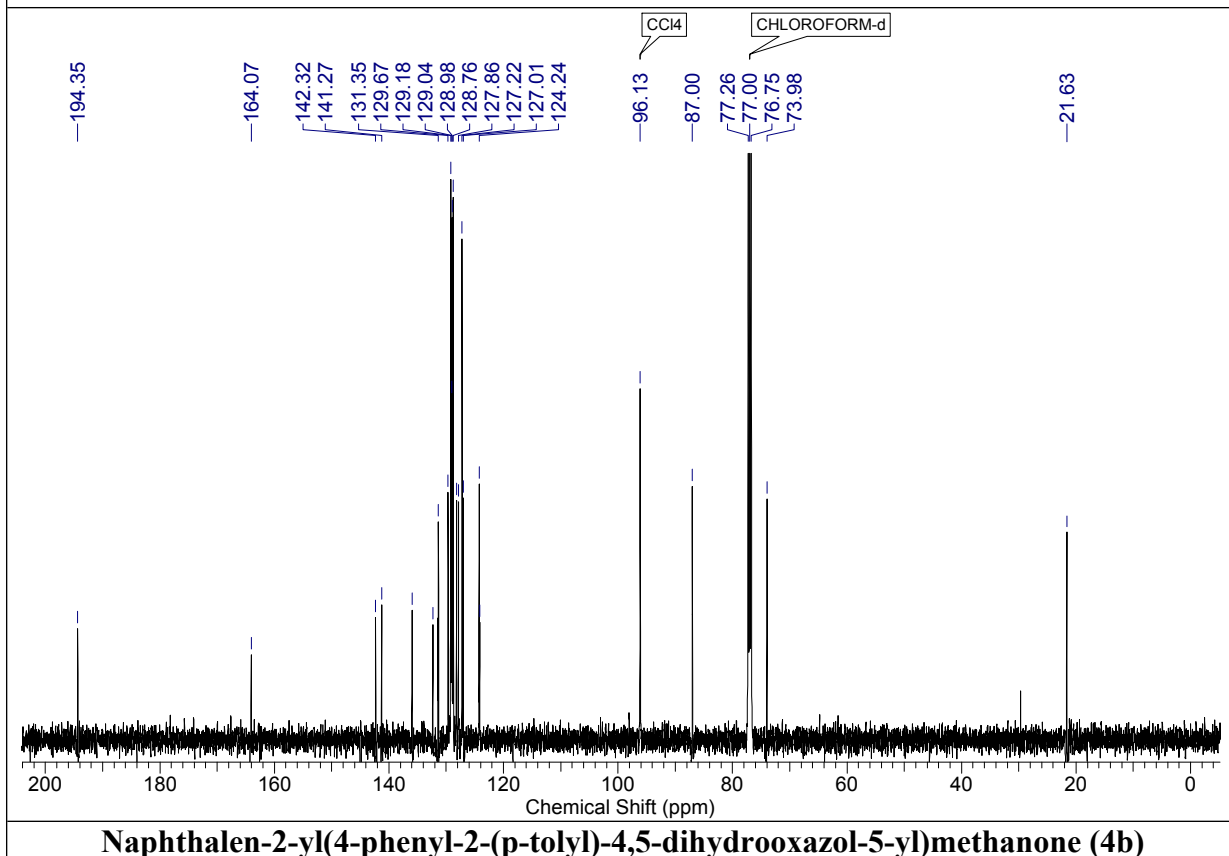

**Naphthalen-2-yl(4-phenyl-2-(p-tolyl)-4,5-dihydrooxazol-5-yl)methanone (4b)**

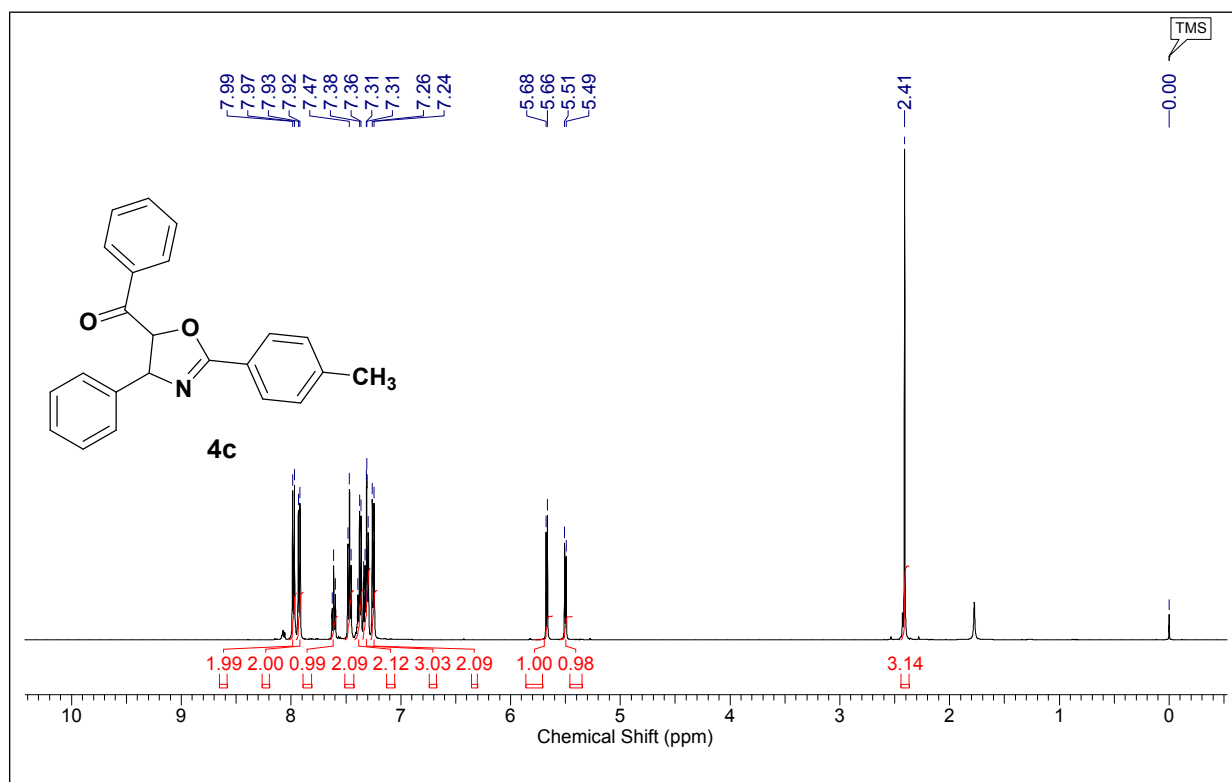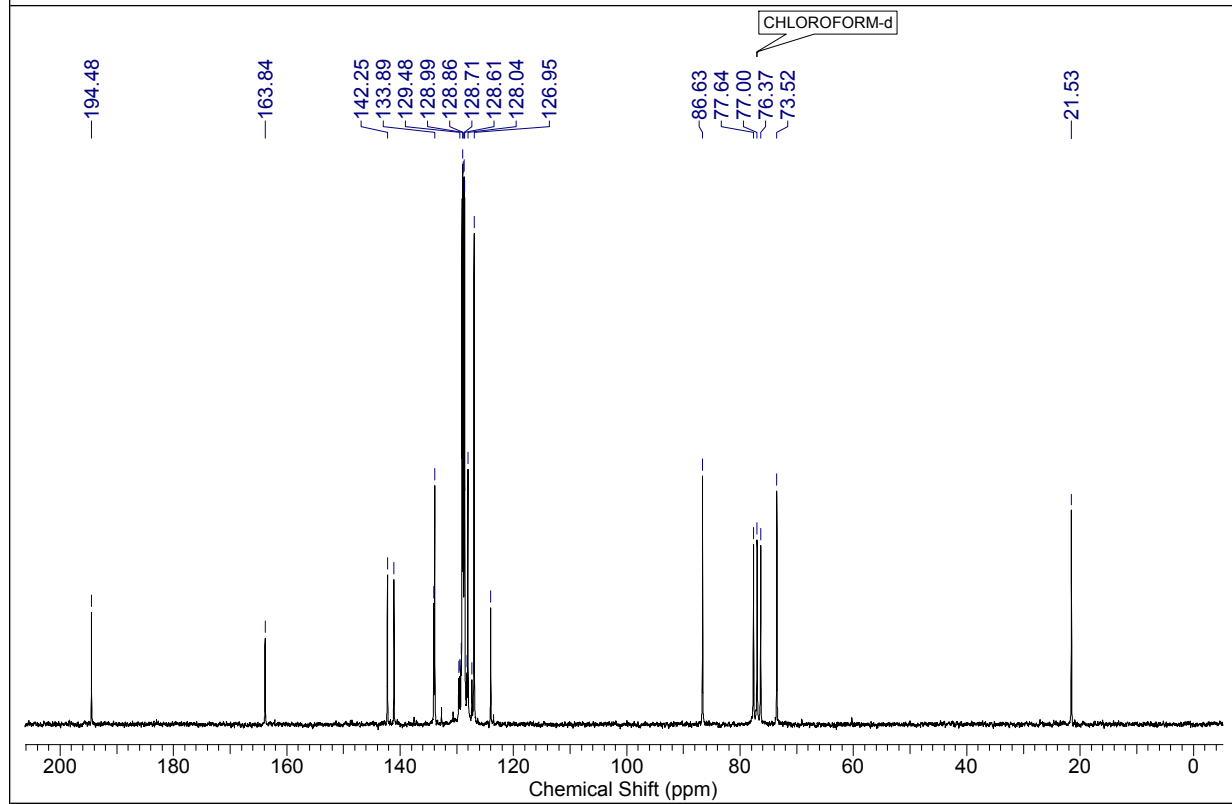

**Phenyl(4-phenyl-2-(p-tolyl)-4,5-dihydrooxazol-5-yl)methanone (4c)**

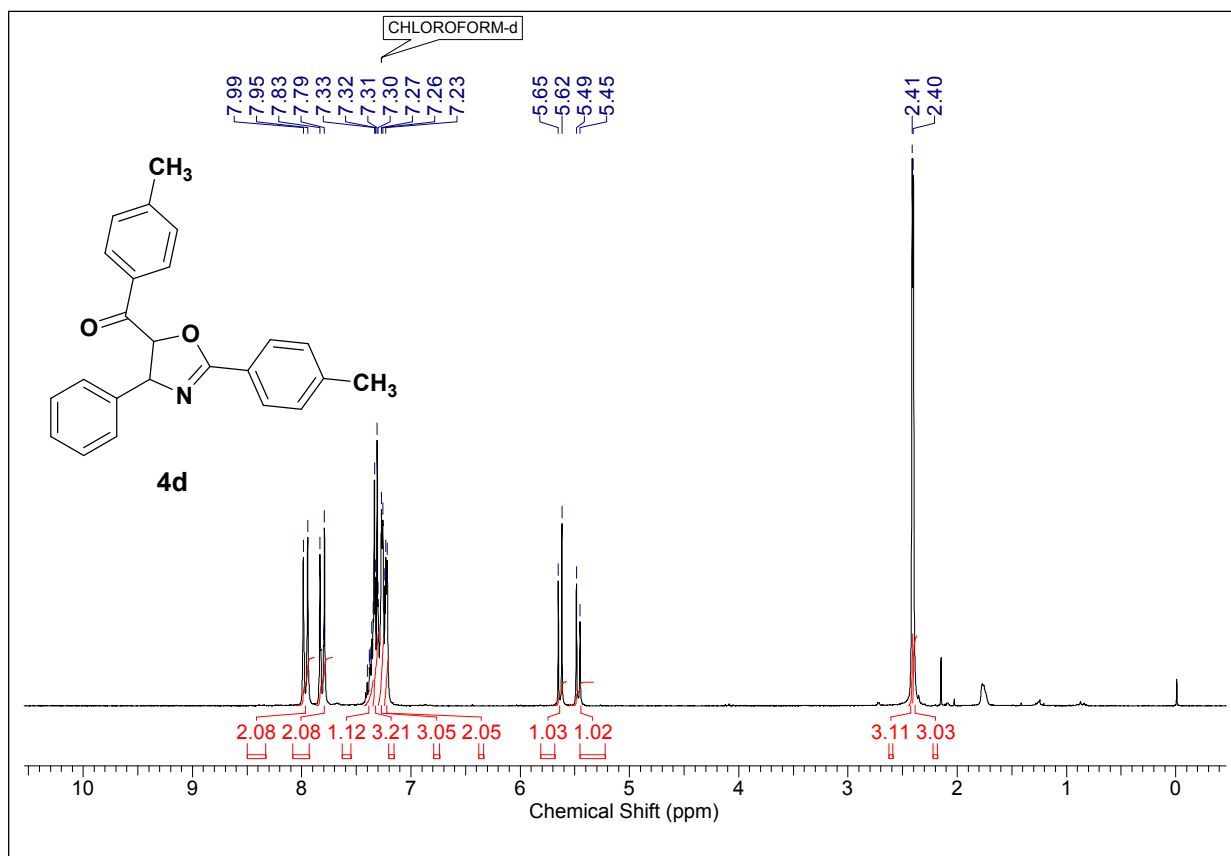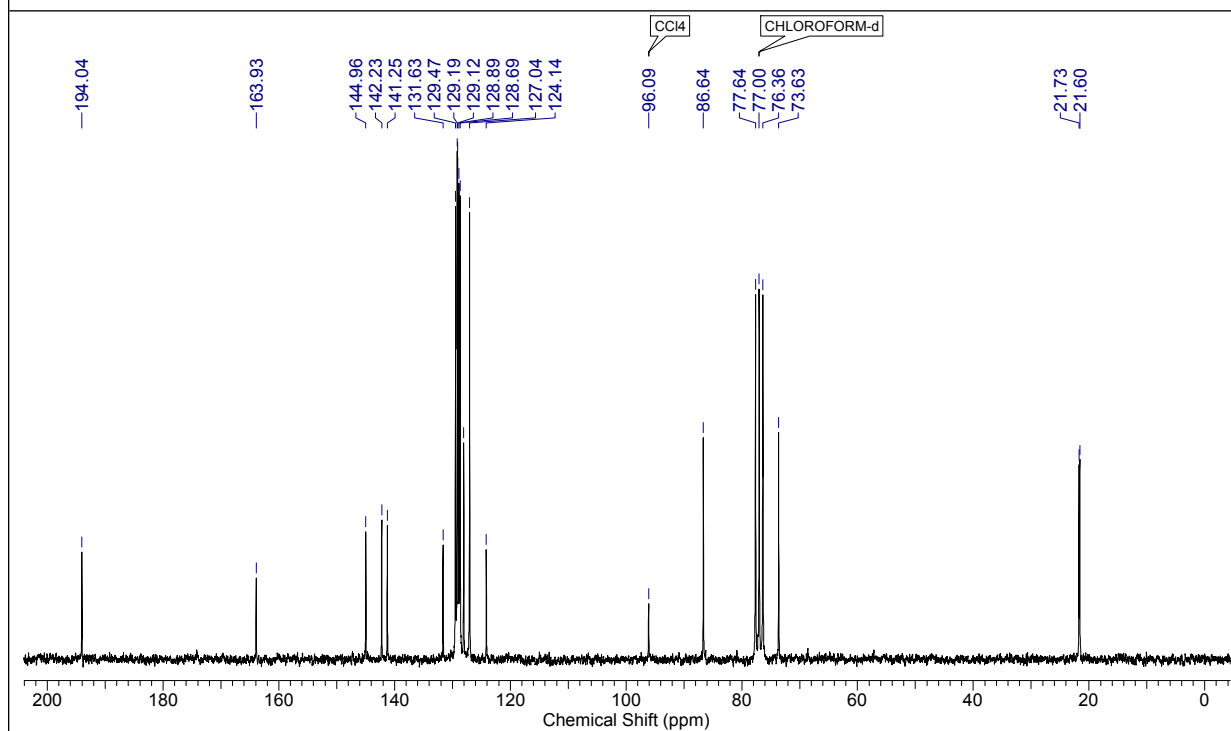

**(4-phenyl-2-(p-tolyl)-4,5-dihydrooxazol-5-yl)(p-tolyl)methanone (4d)**

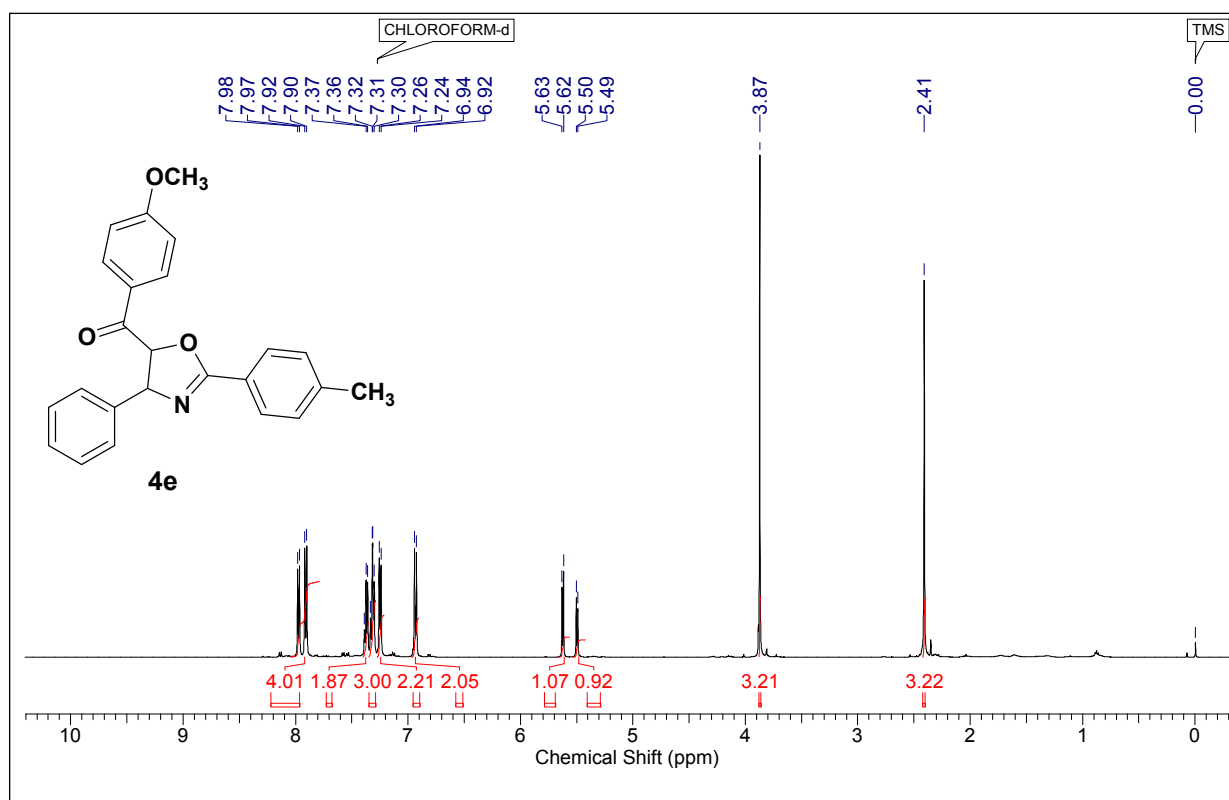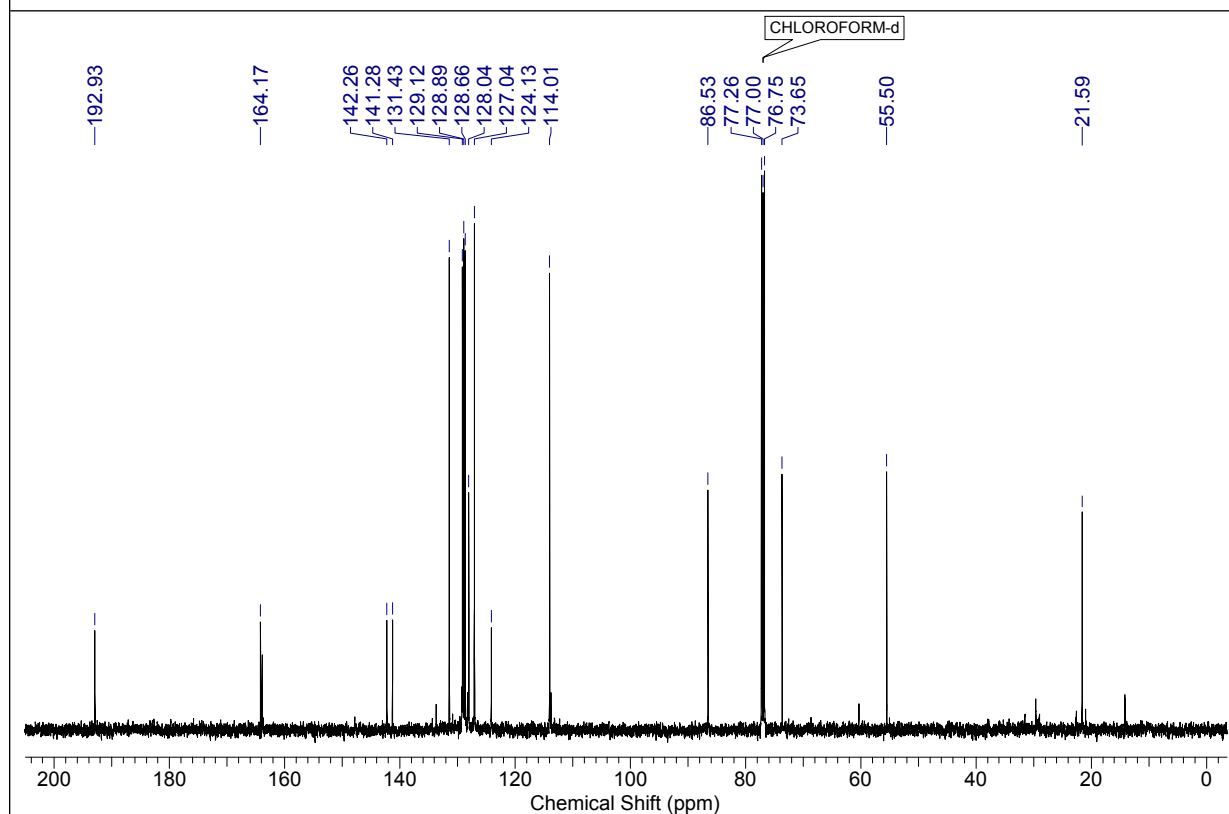

**(4-methoxyphenyl)(4-phenyl-2-(p-tolyl)-4,5-dihydrooxazol-5-yl)methanone (4e)**

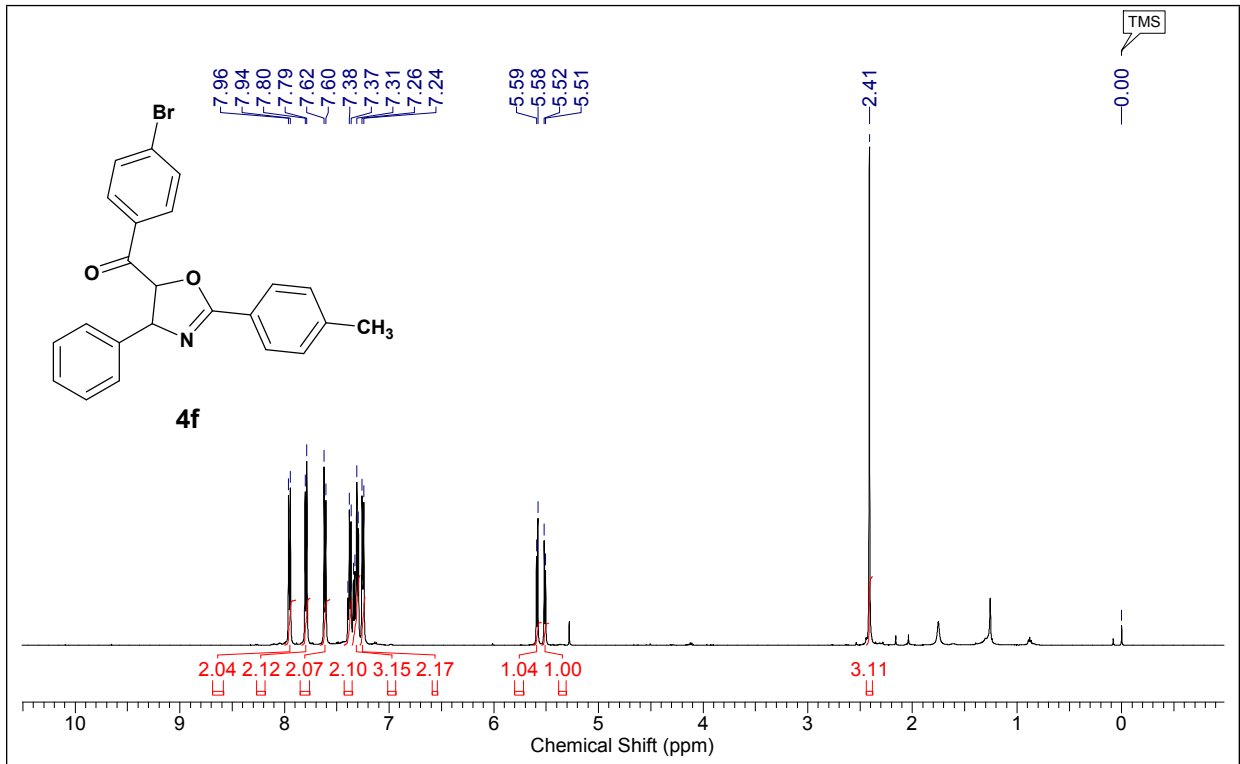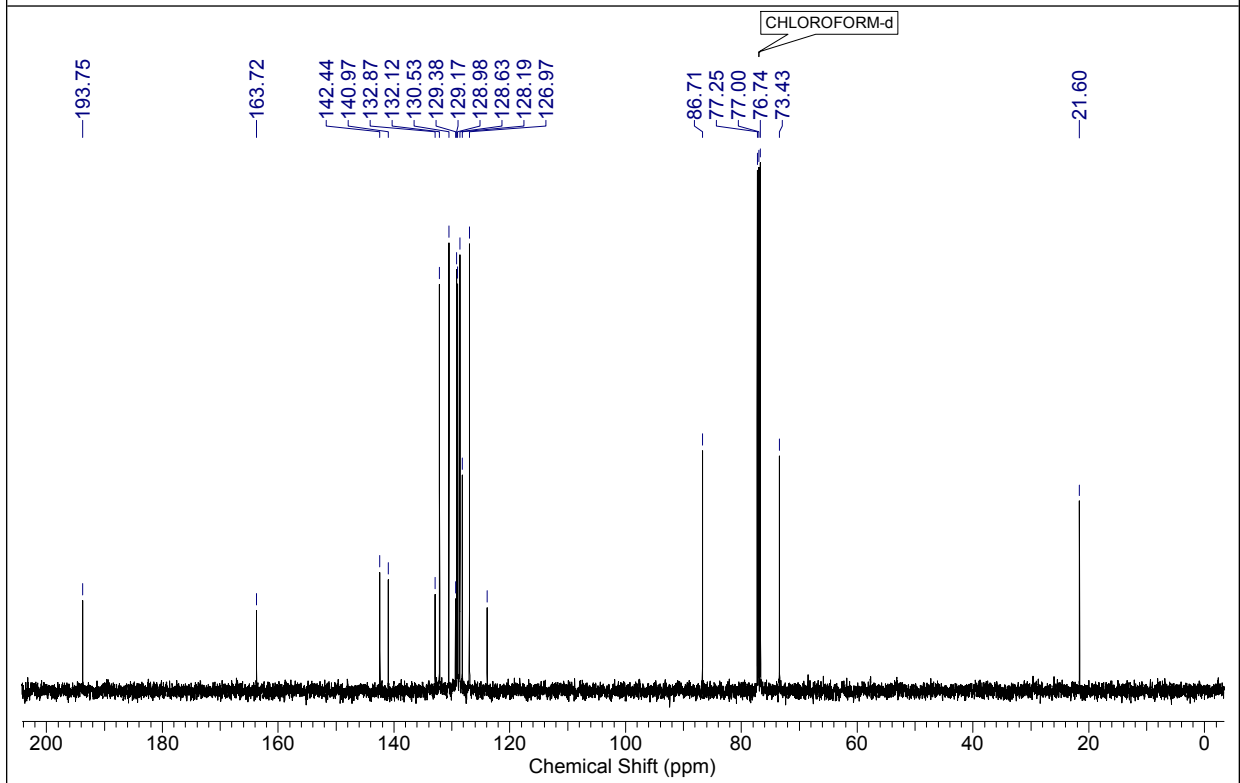

**(4-bromophenyl)(4-phenyl-2-(p-tolyl)-4,5-dihydrooxazol-5-yl)methanone (4f)**

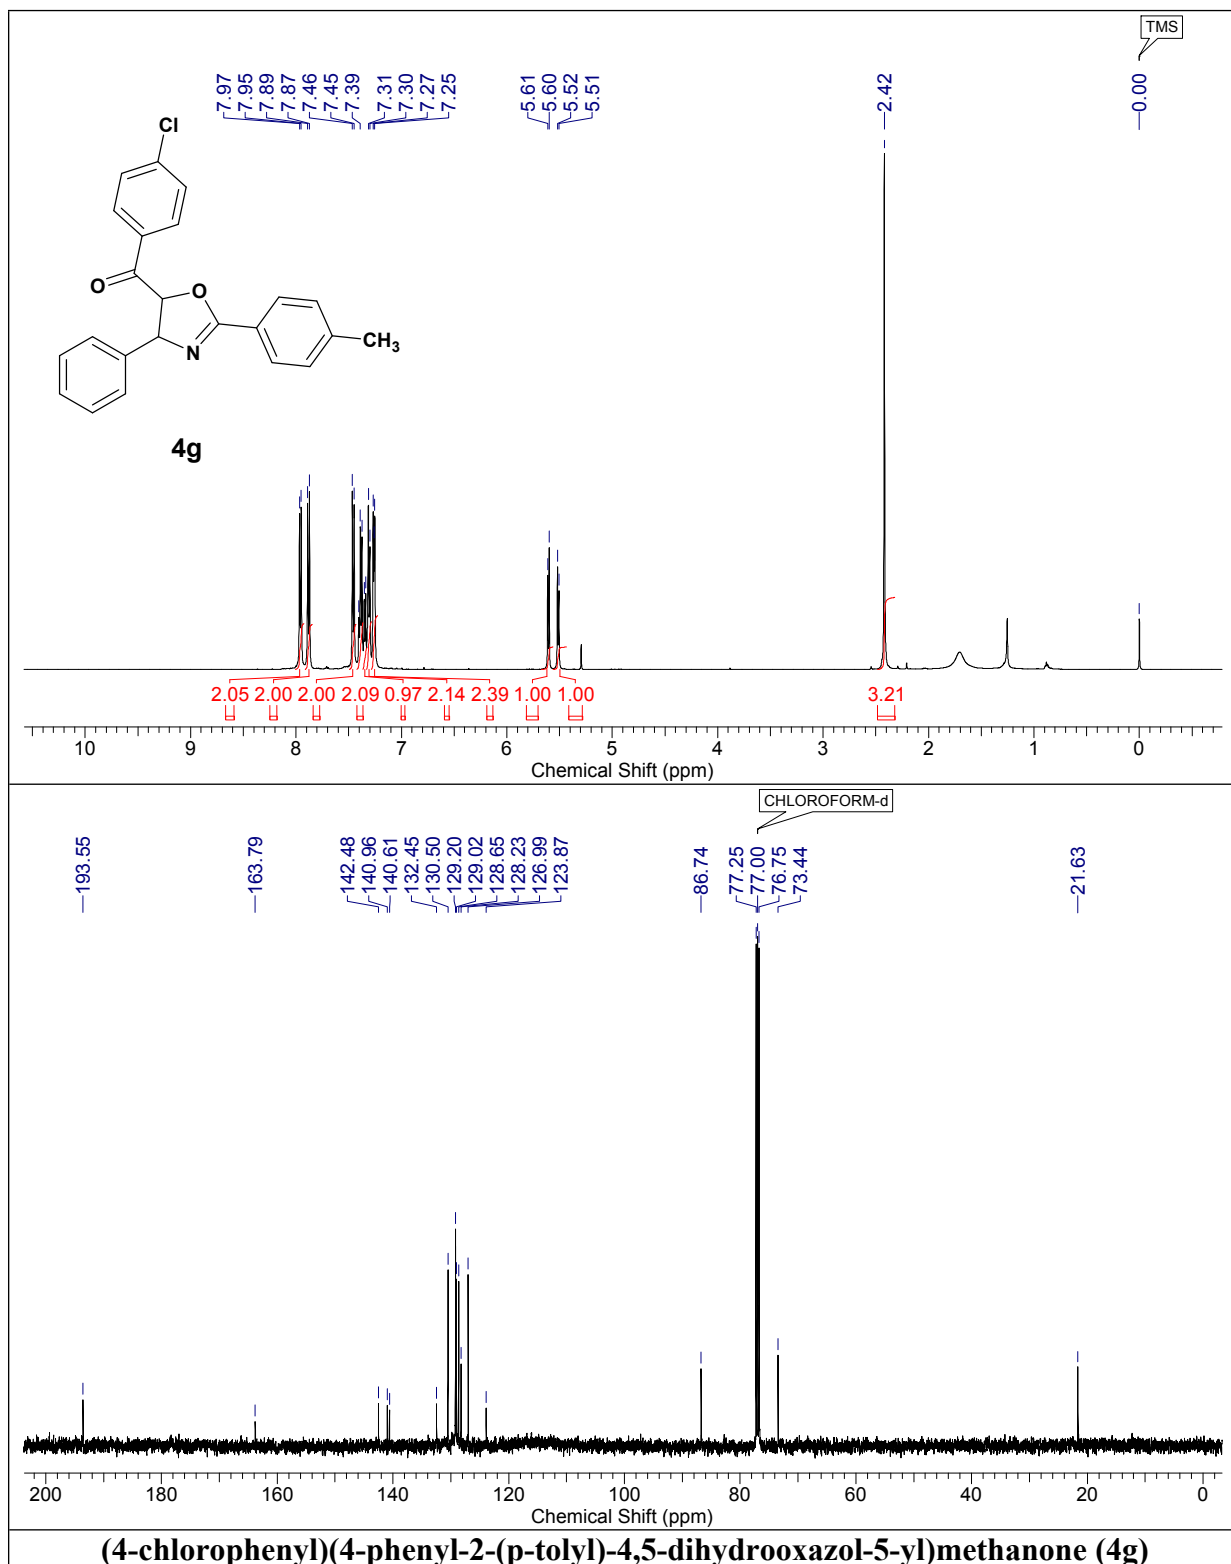

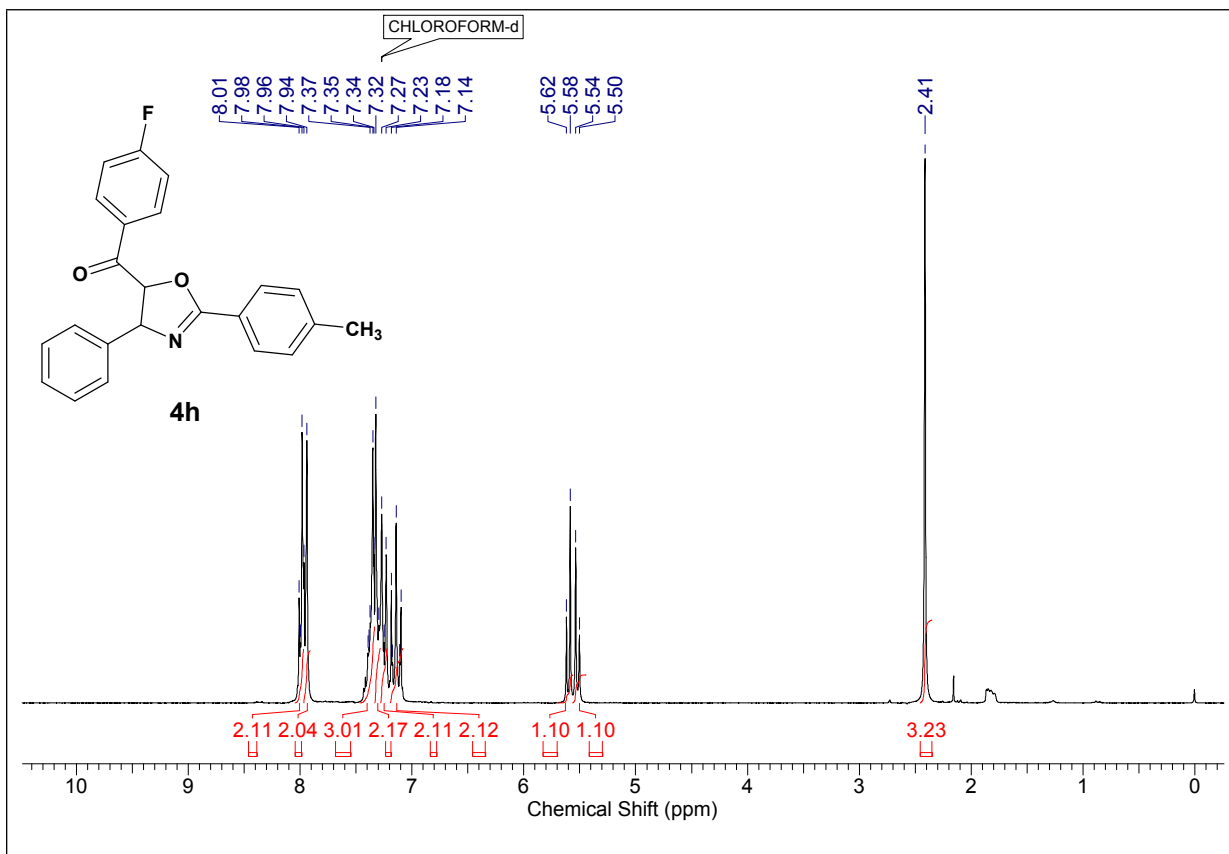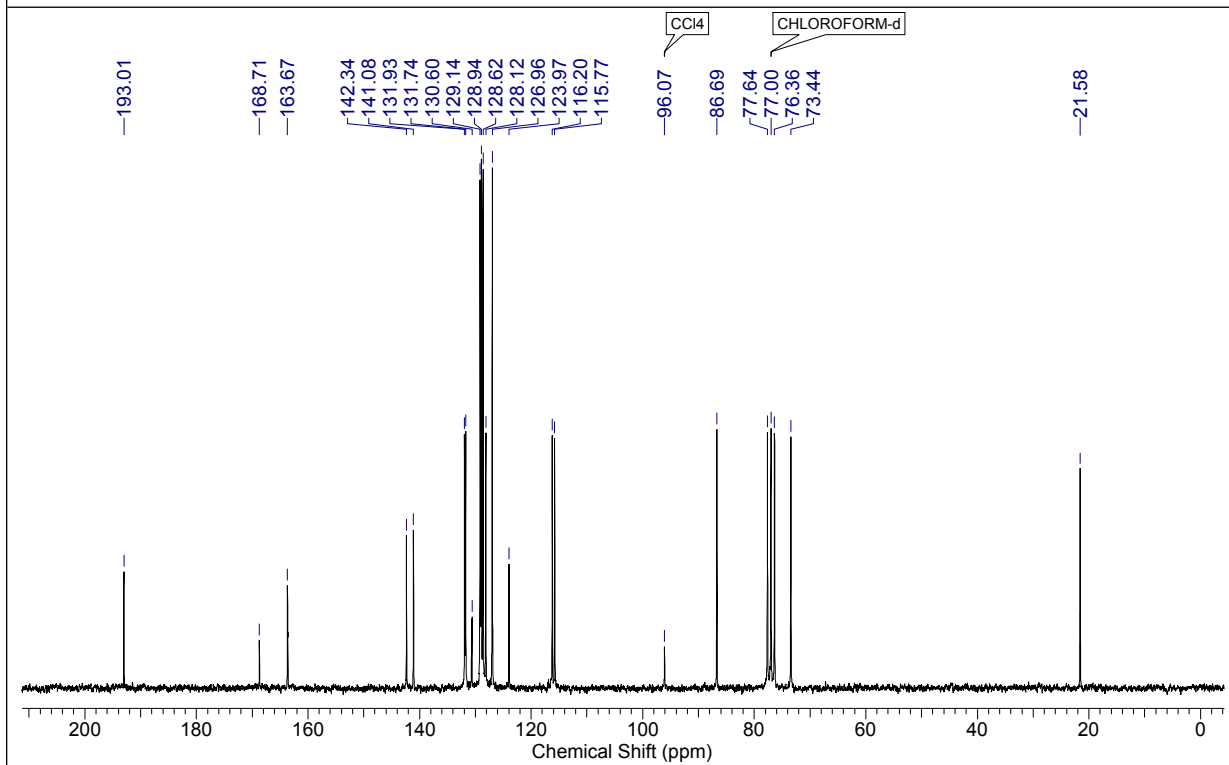

**(4-fluorophenyl)(4-phenyl-2-(p-tolyl)-4,5-dihydrooxazol-5-yl)methanone (4h)**



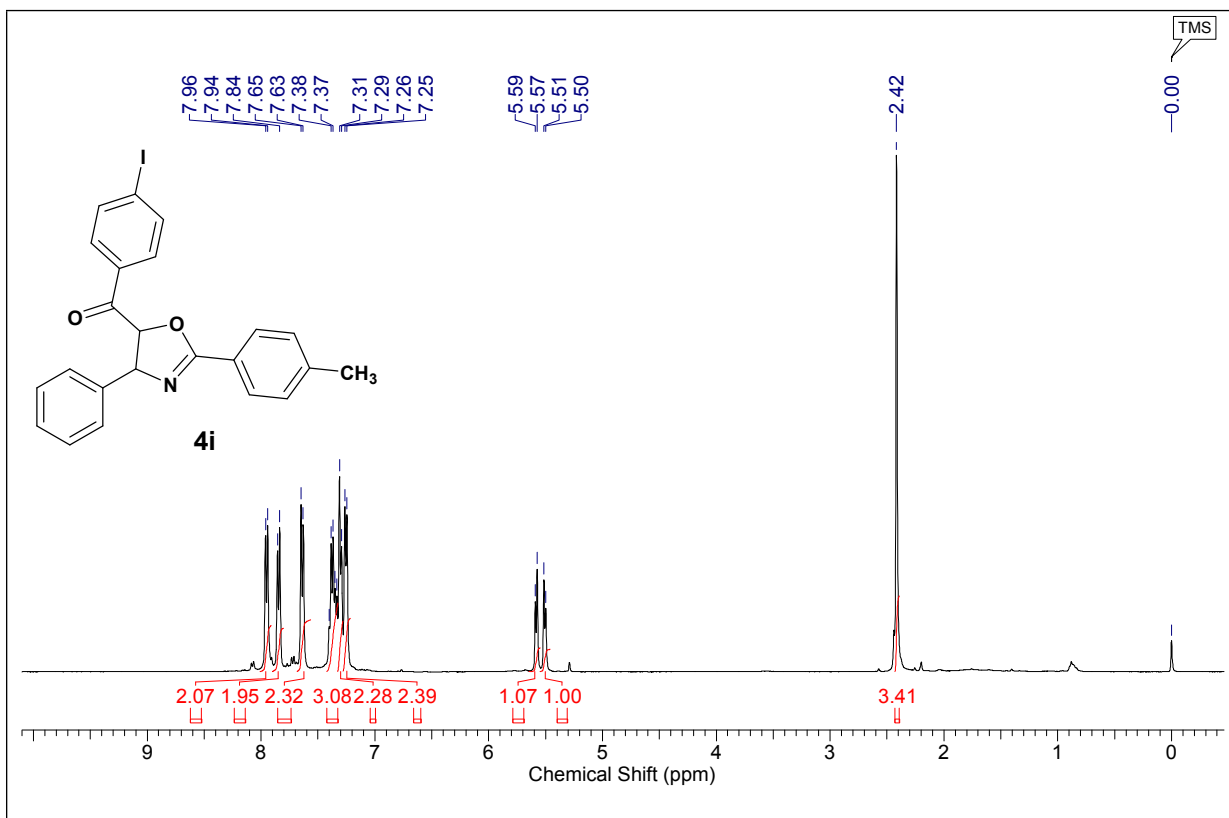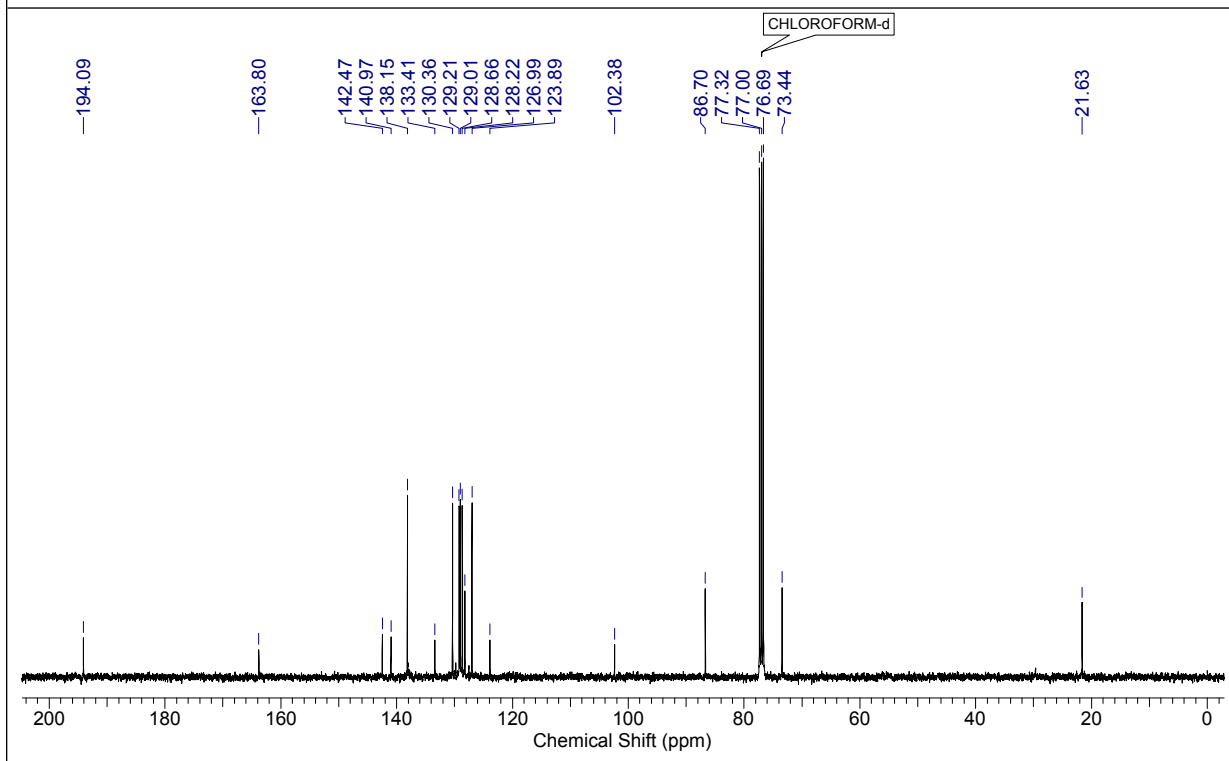

**(4-iodophenyl)(4-phenyl-2-(p-tolyl)-4,5-dihydrooxazol-5-yl)methanone (4i)**

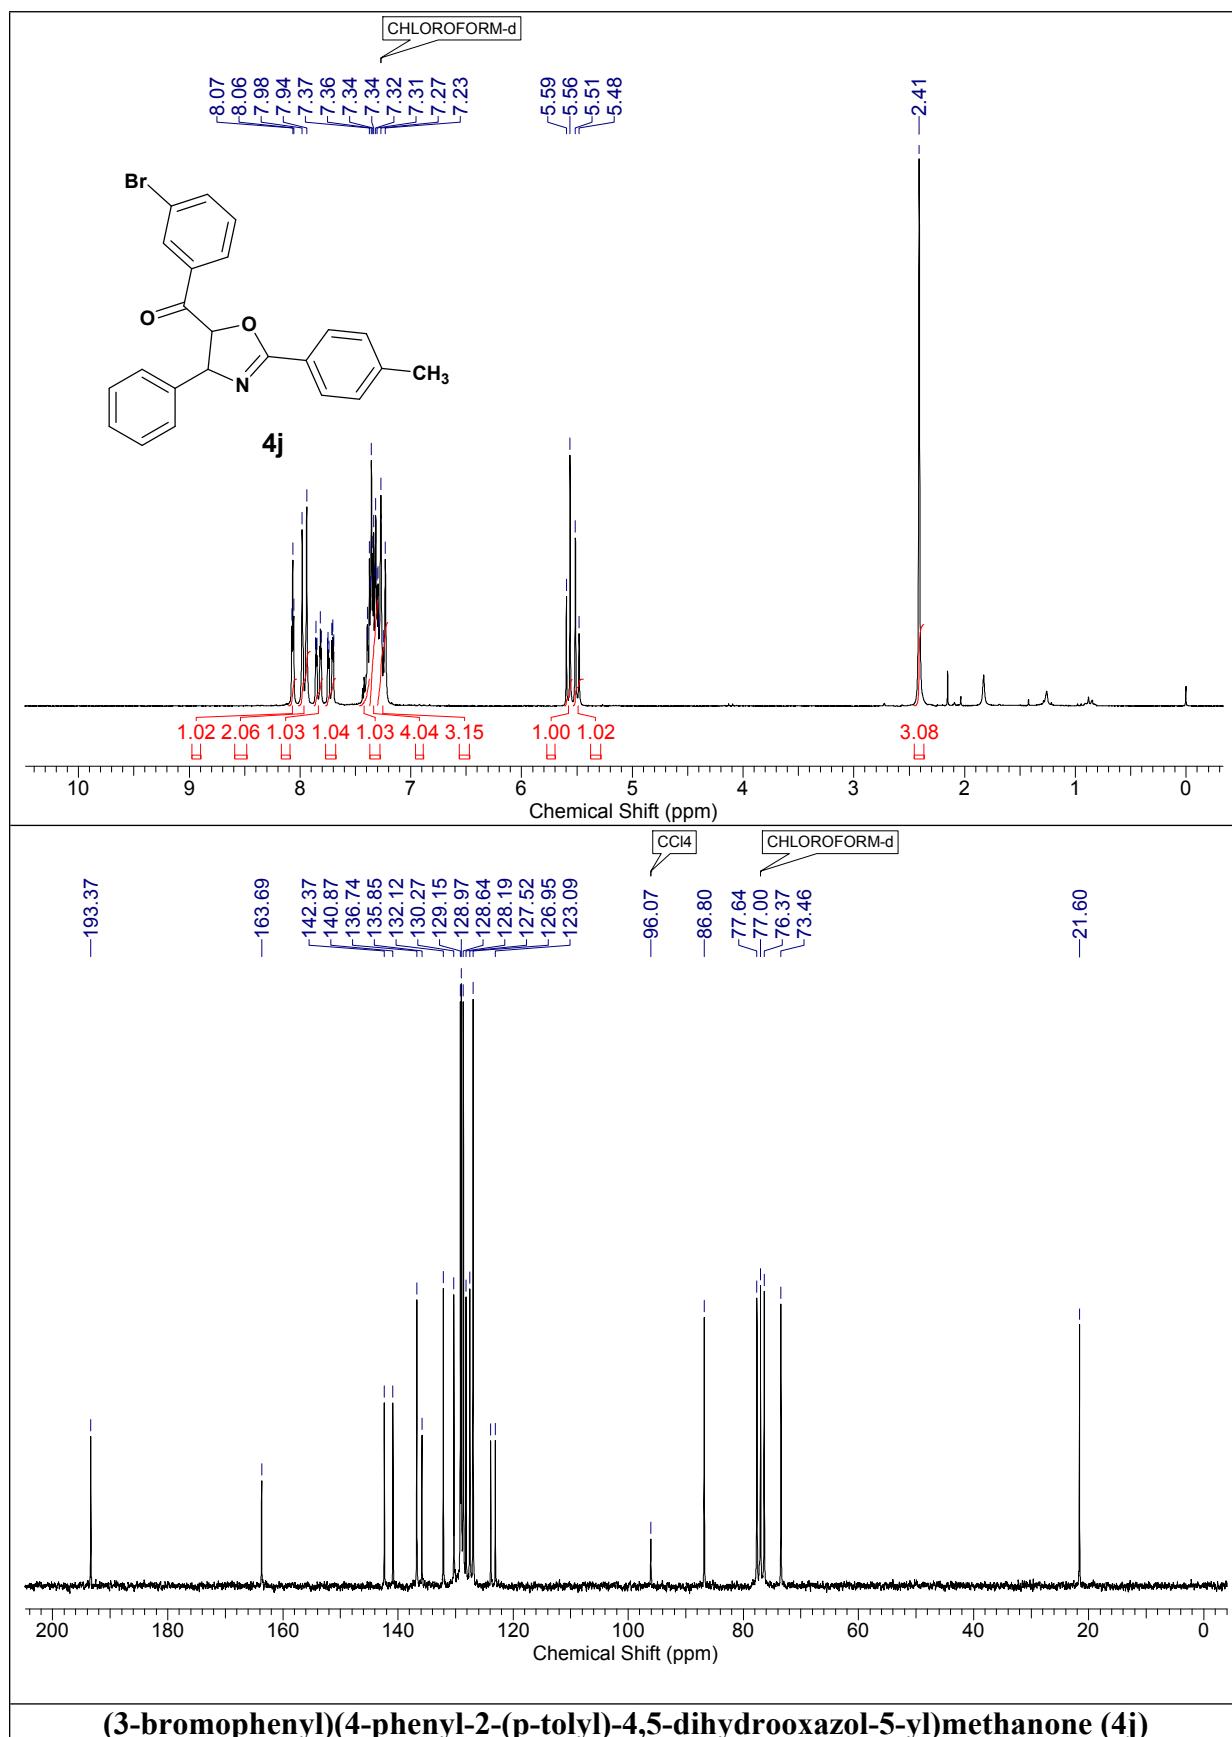

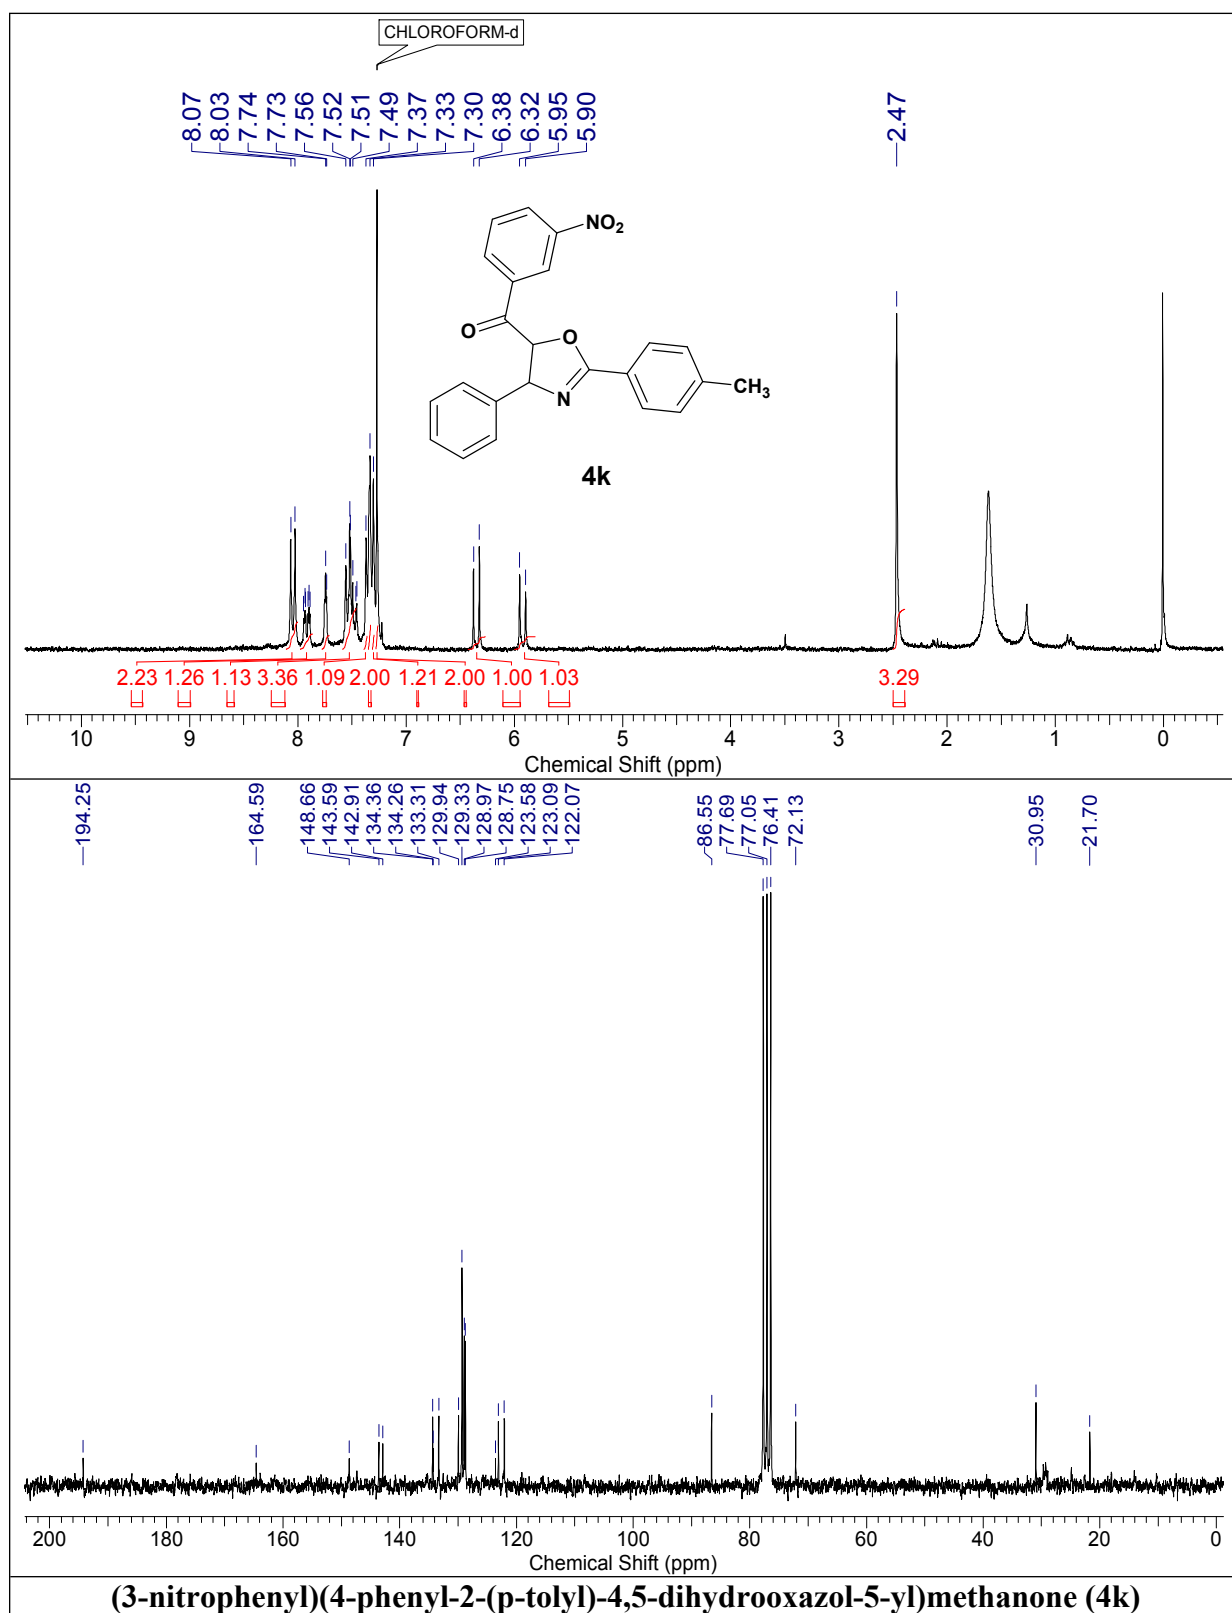

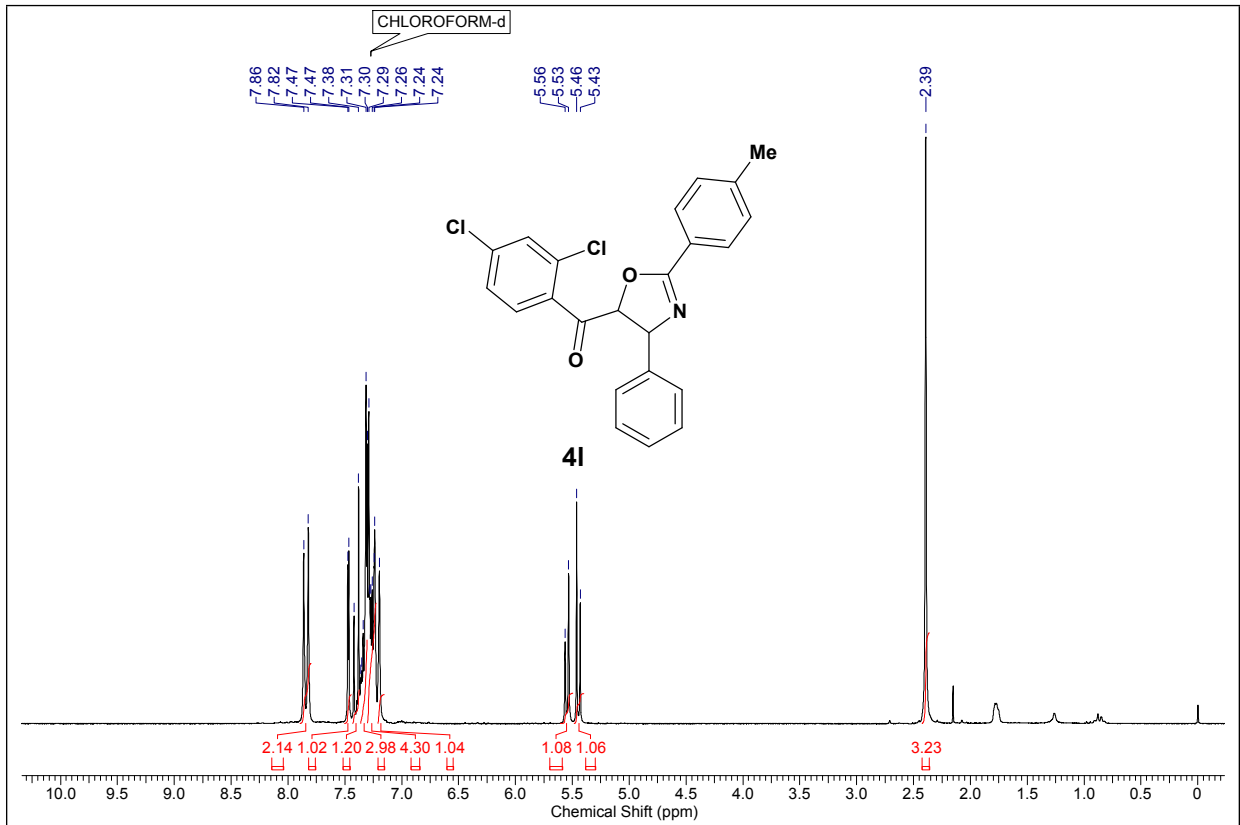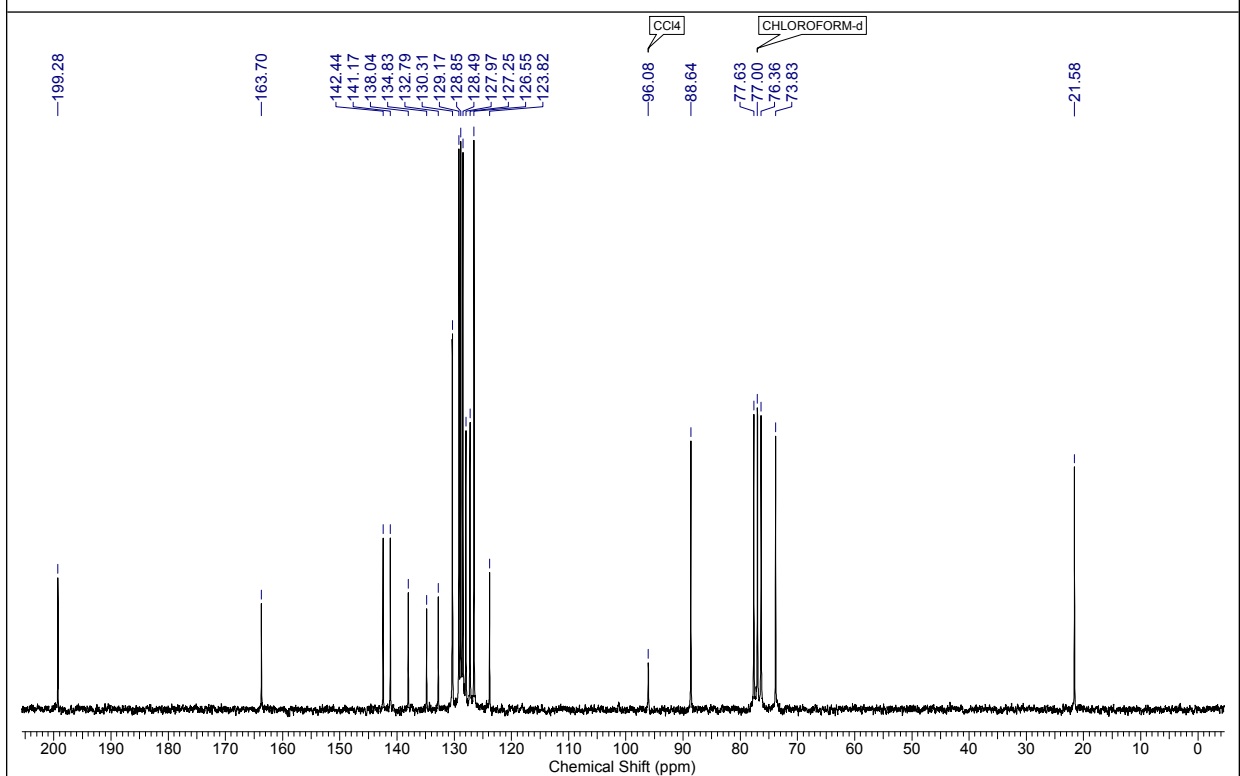

**(2,4-dichlorophenyl)(4-phenyl-2-(p-tolyl)-4,5-dihydrooxazol-5-yl)methanone (4l)**

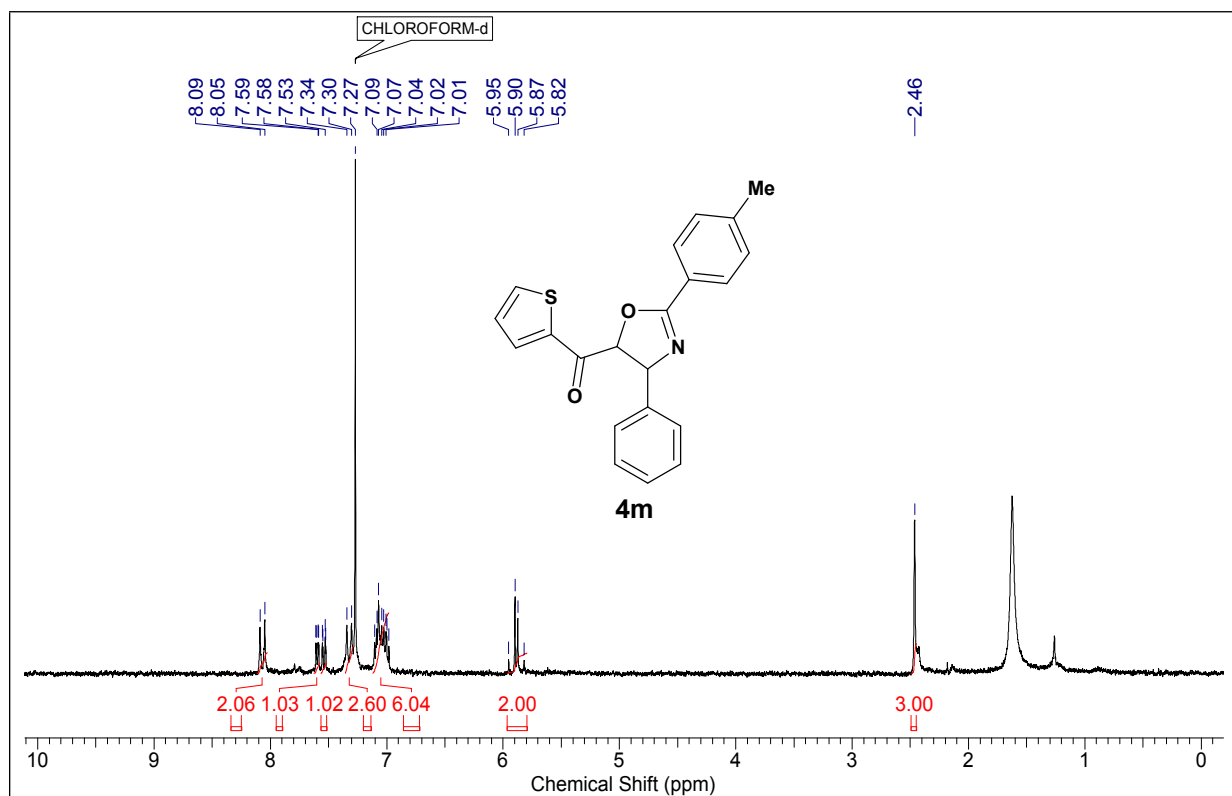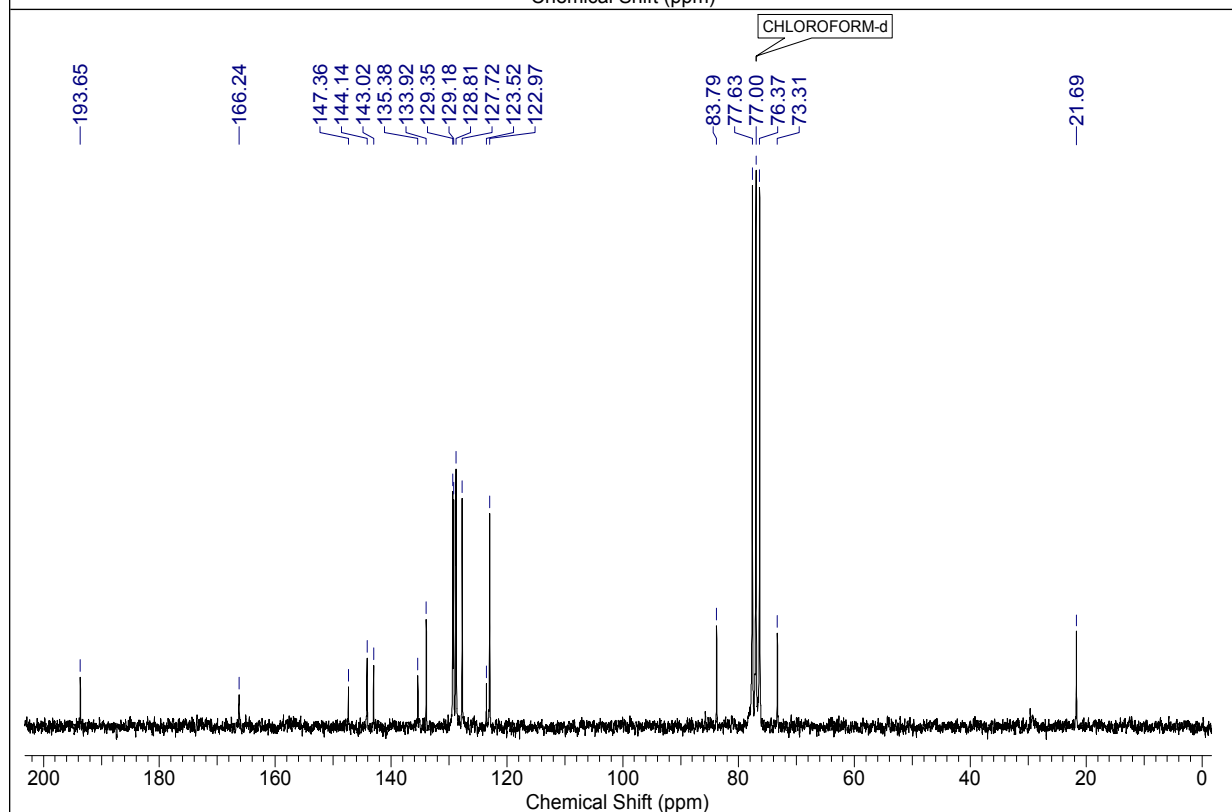

**(4-phenyl-2-(p-tolyl)-4,5-dihydrooxazol-5-yl)(thiophen-2-yl)methanone (4m)**

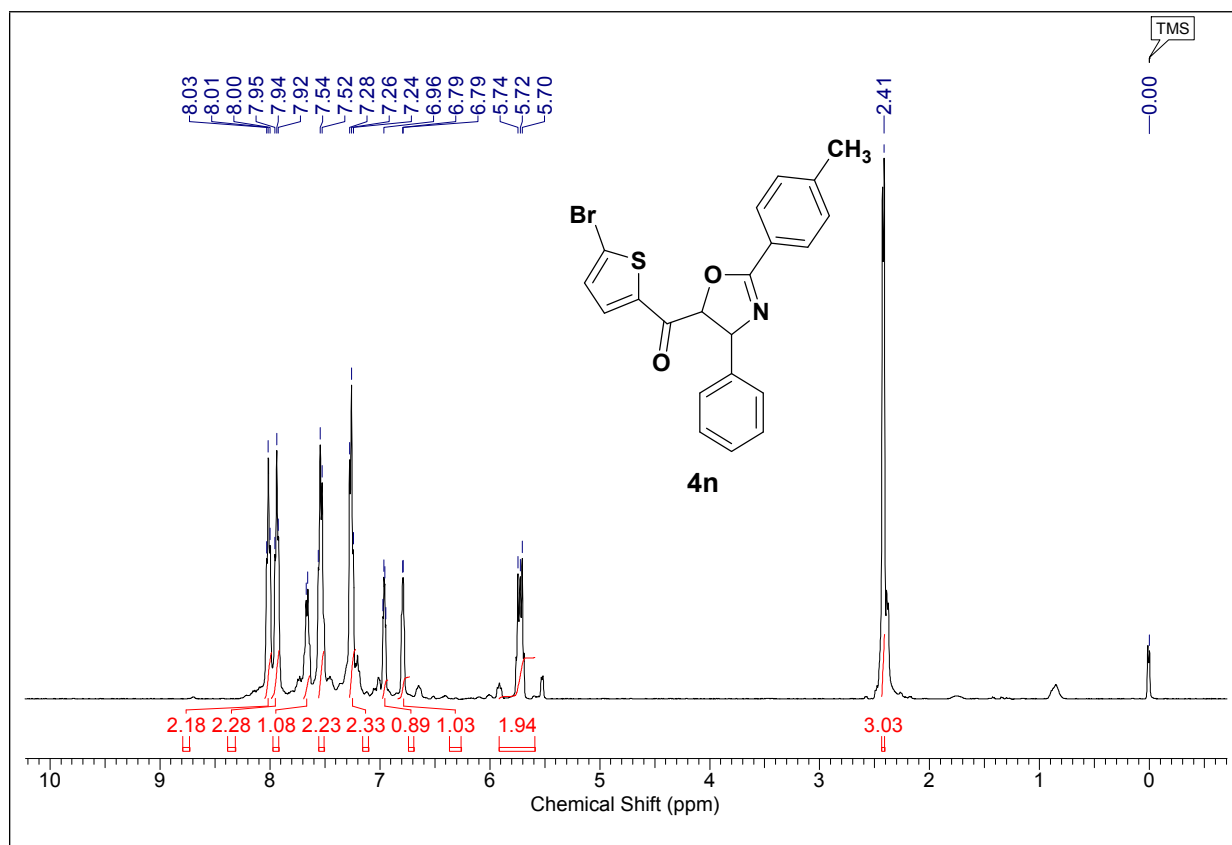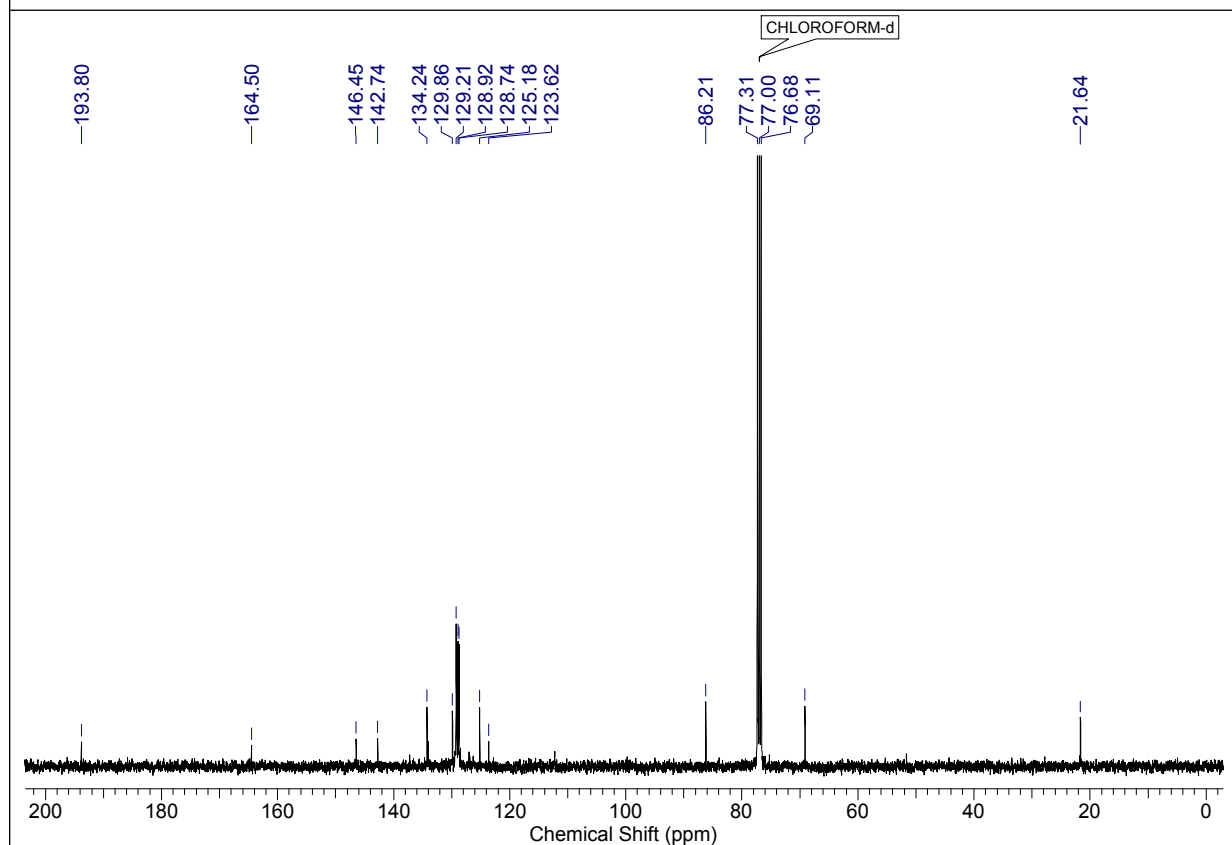

**(5-bromothiophen-2-yl)(4-phenyl-2-(p-tolyl)-4,5-dihydrooxazol-5-yl)methanone (4n)**

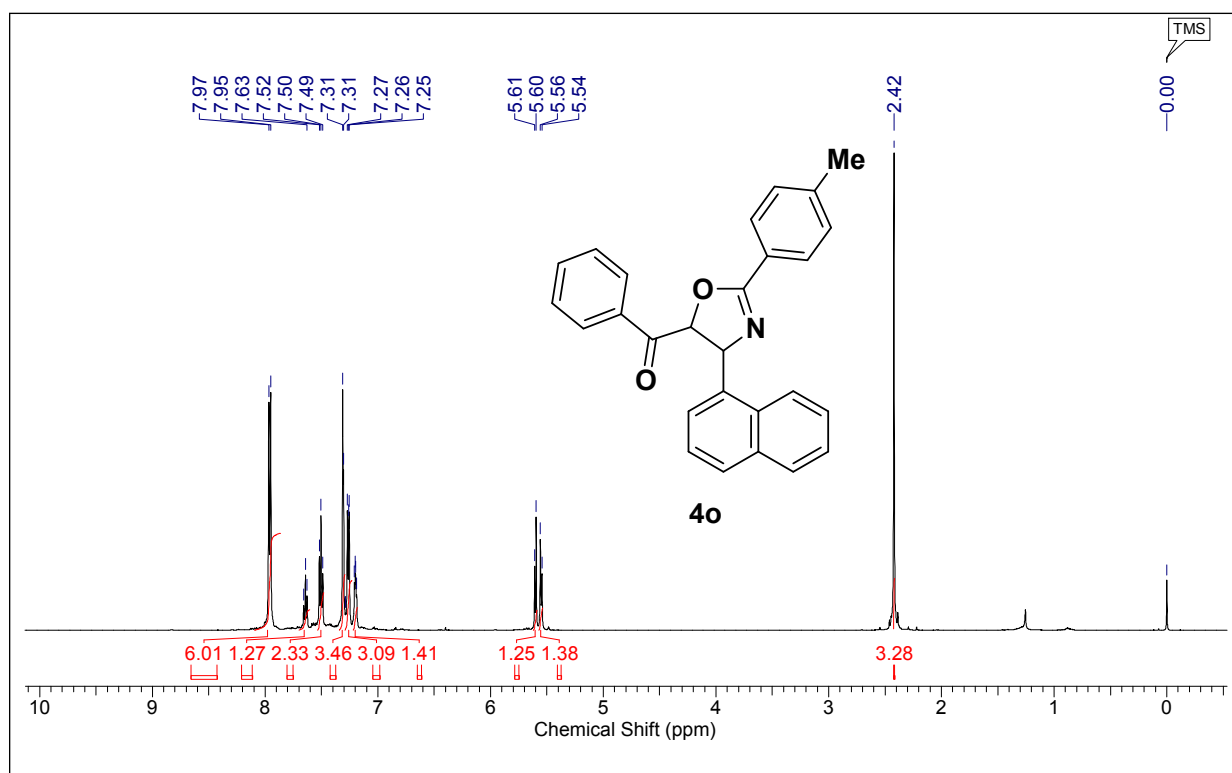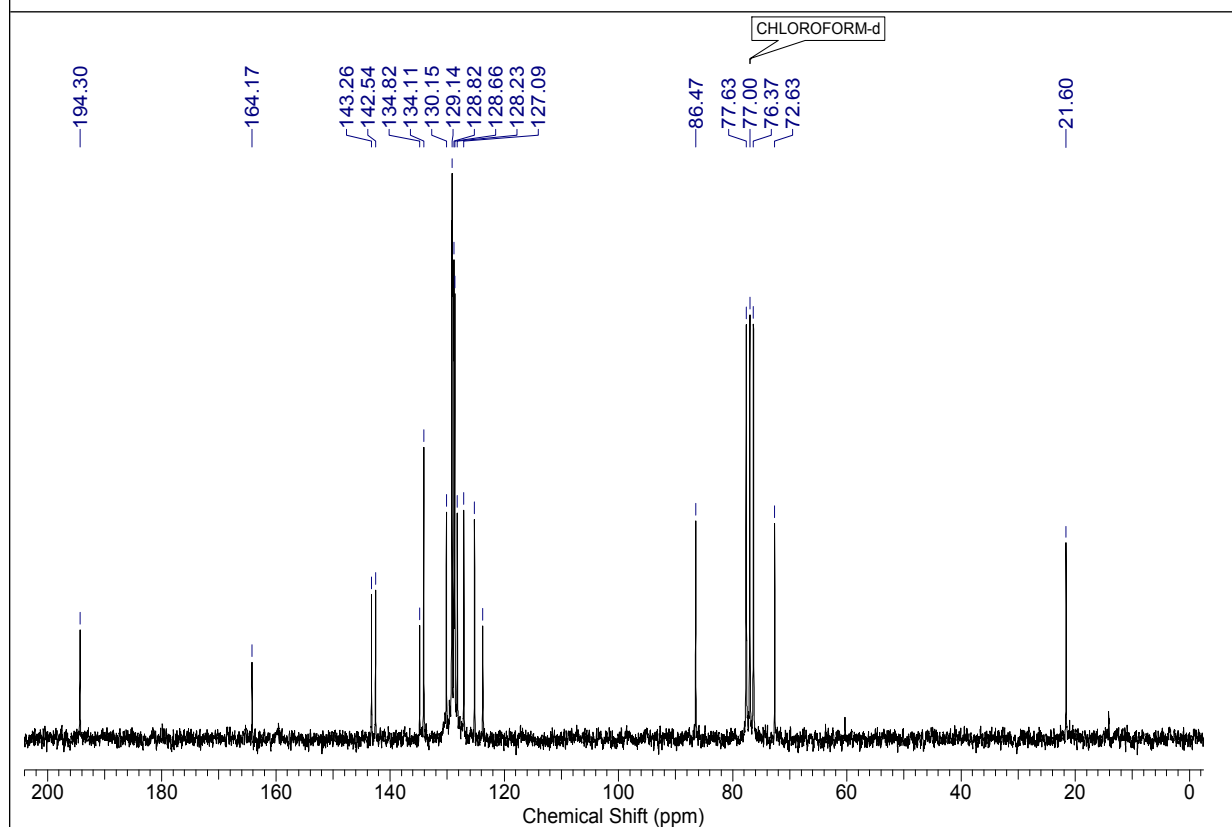

**(4-(naphthalen-1-yl)-2-(p-tolyl)-4,5-dihydrooxazol-5-yl)(phenyl)methanone (4o)**

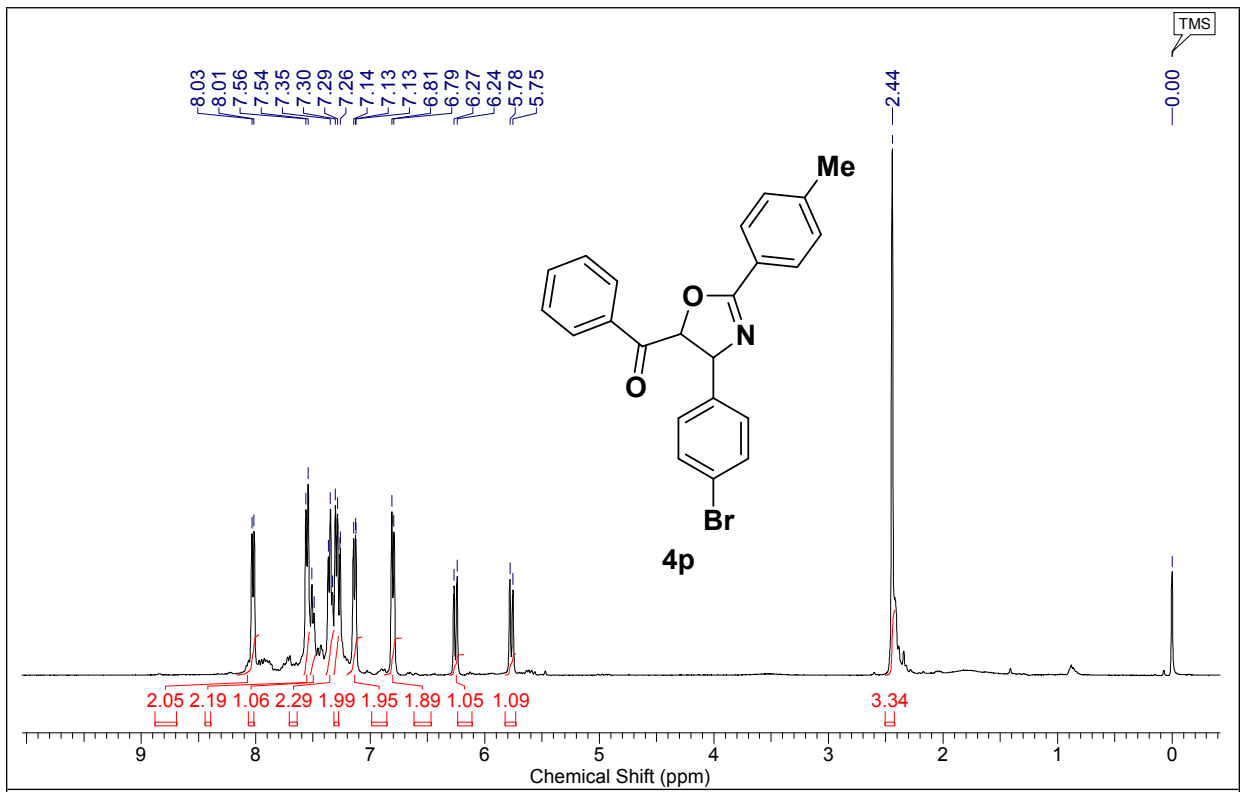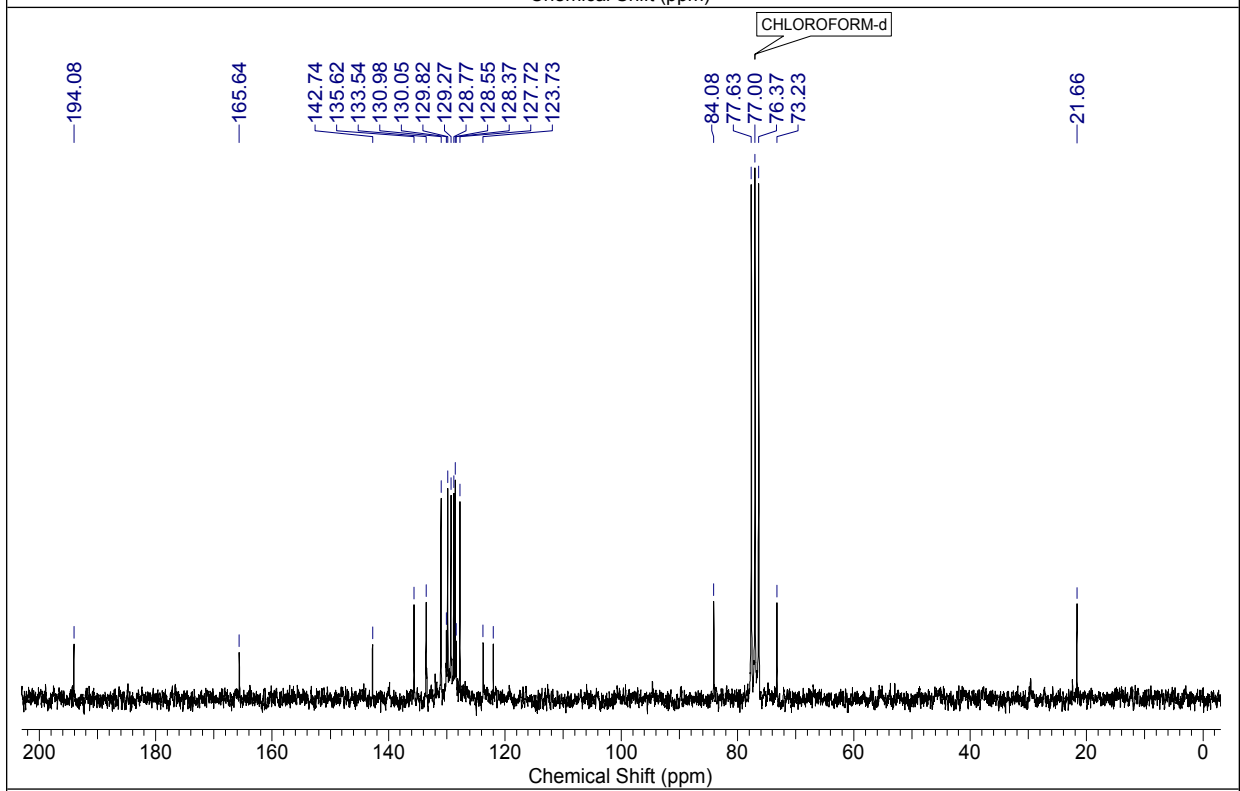

**(4-(4-bromophenyl)-2-(p-tolyl)-4,5-dihydrooxazol-5-yl)(phenyl)methanone (4p)**



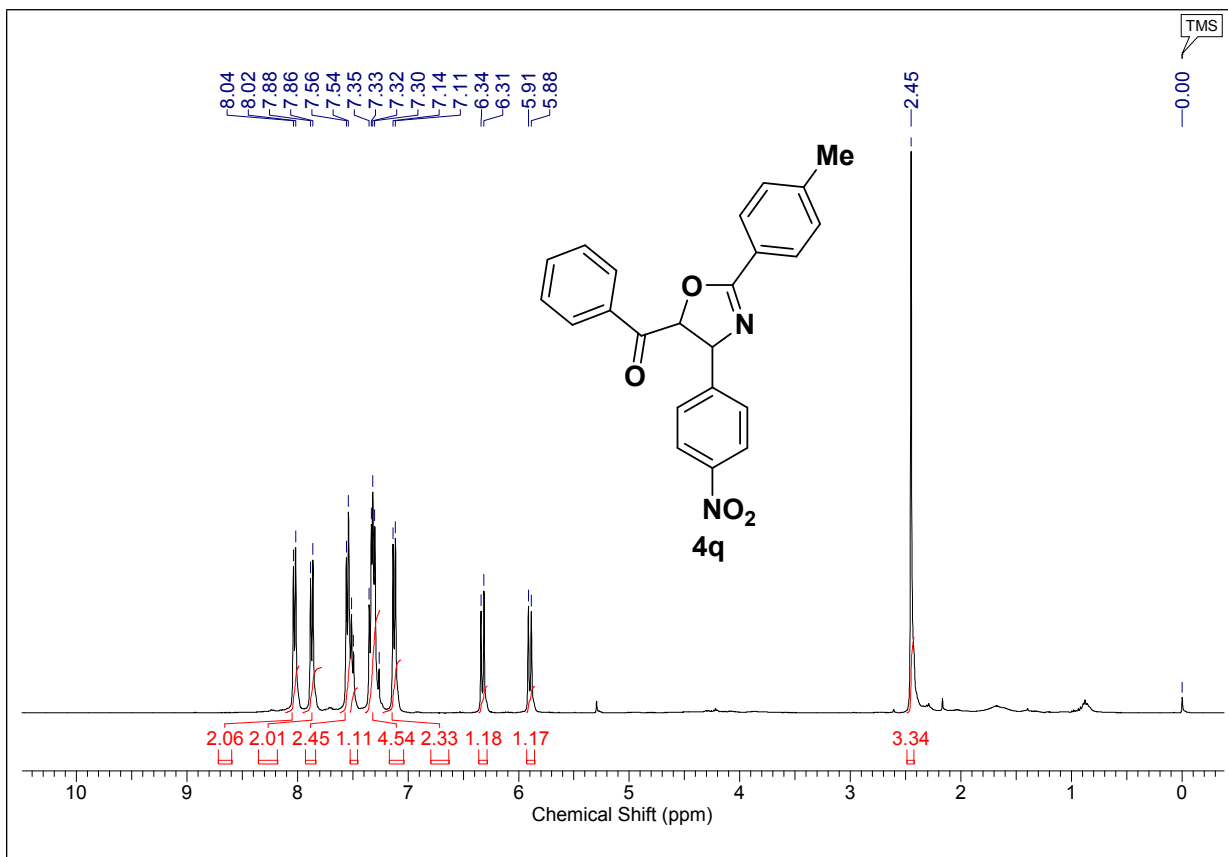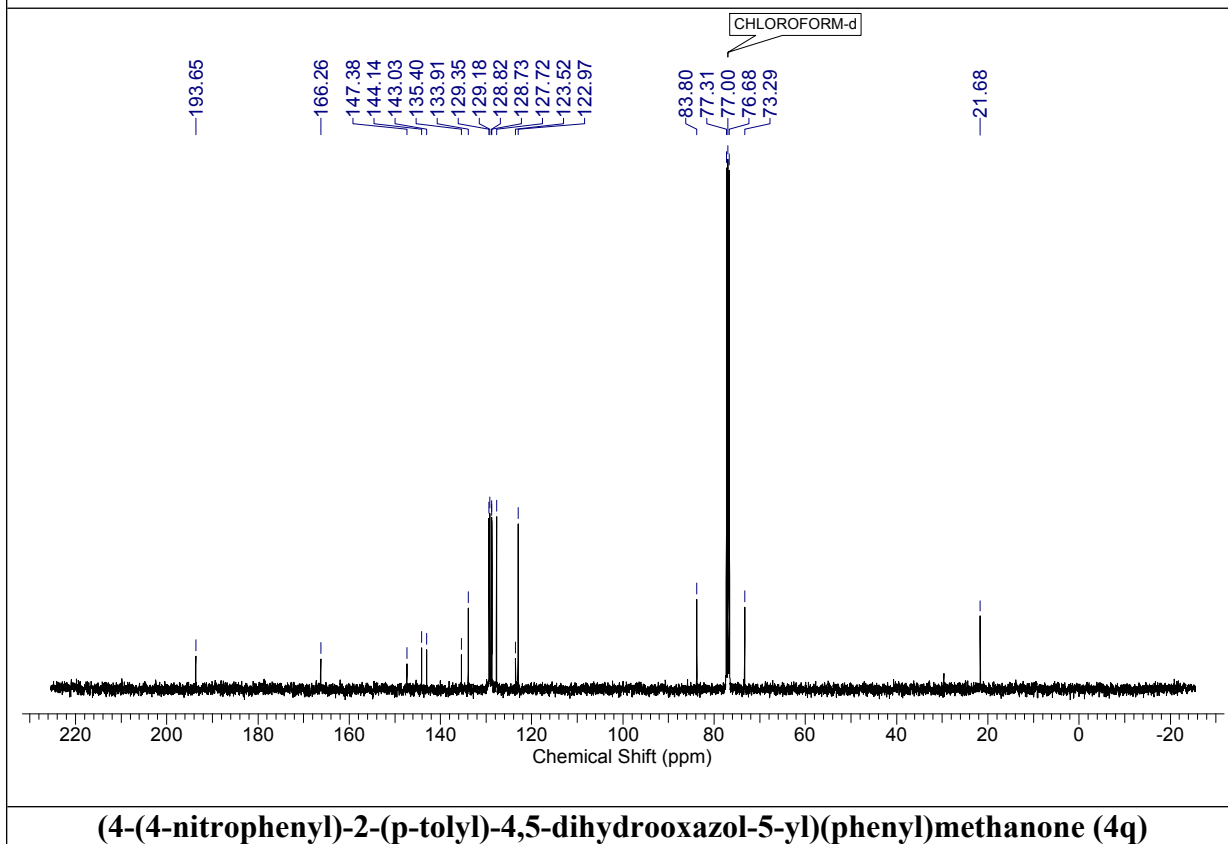

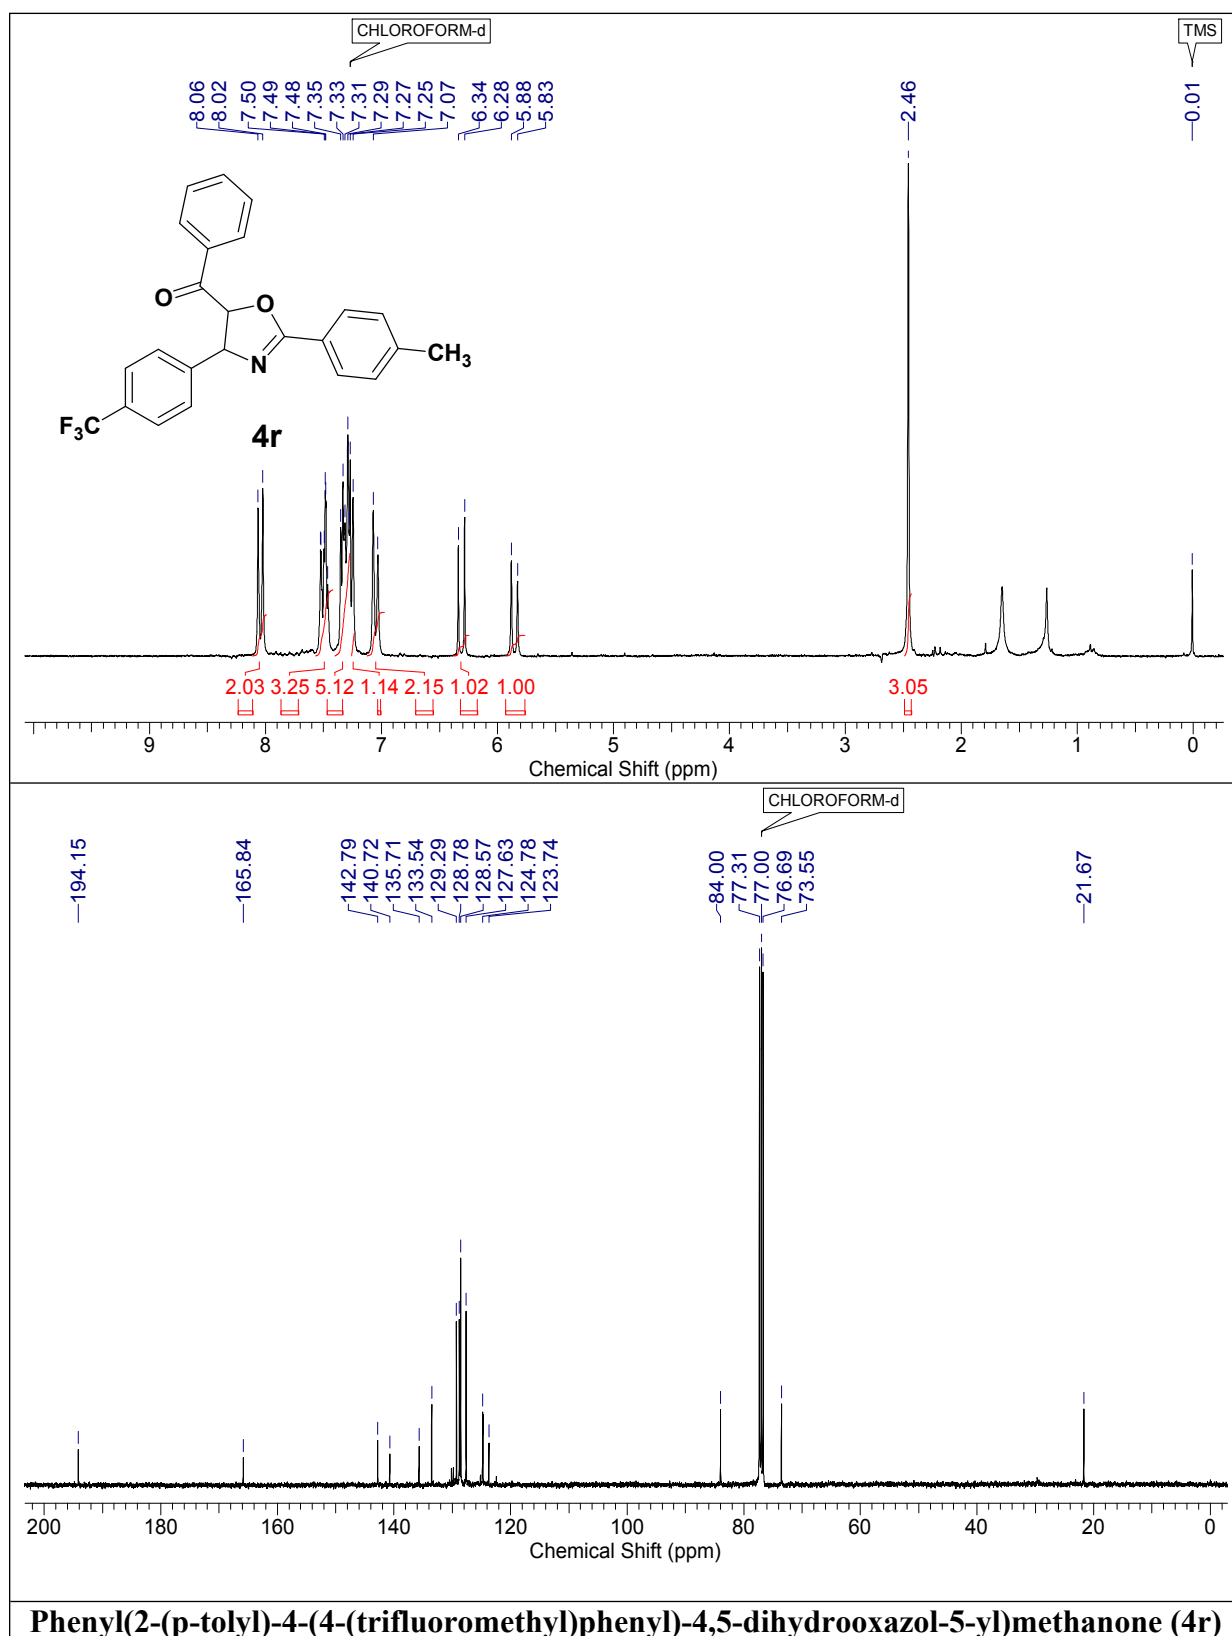

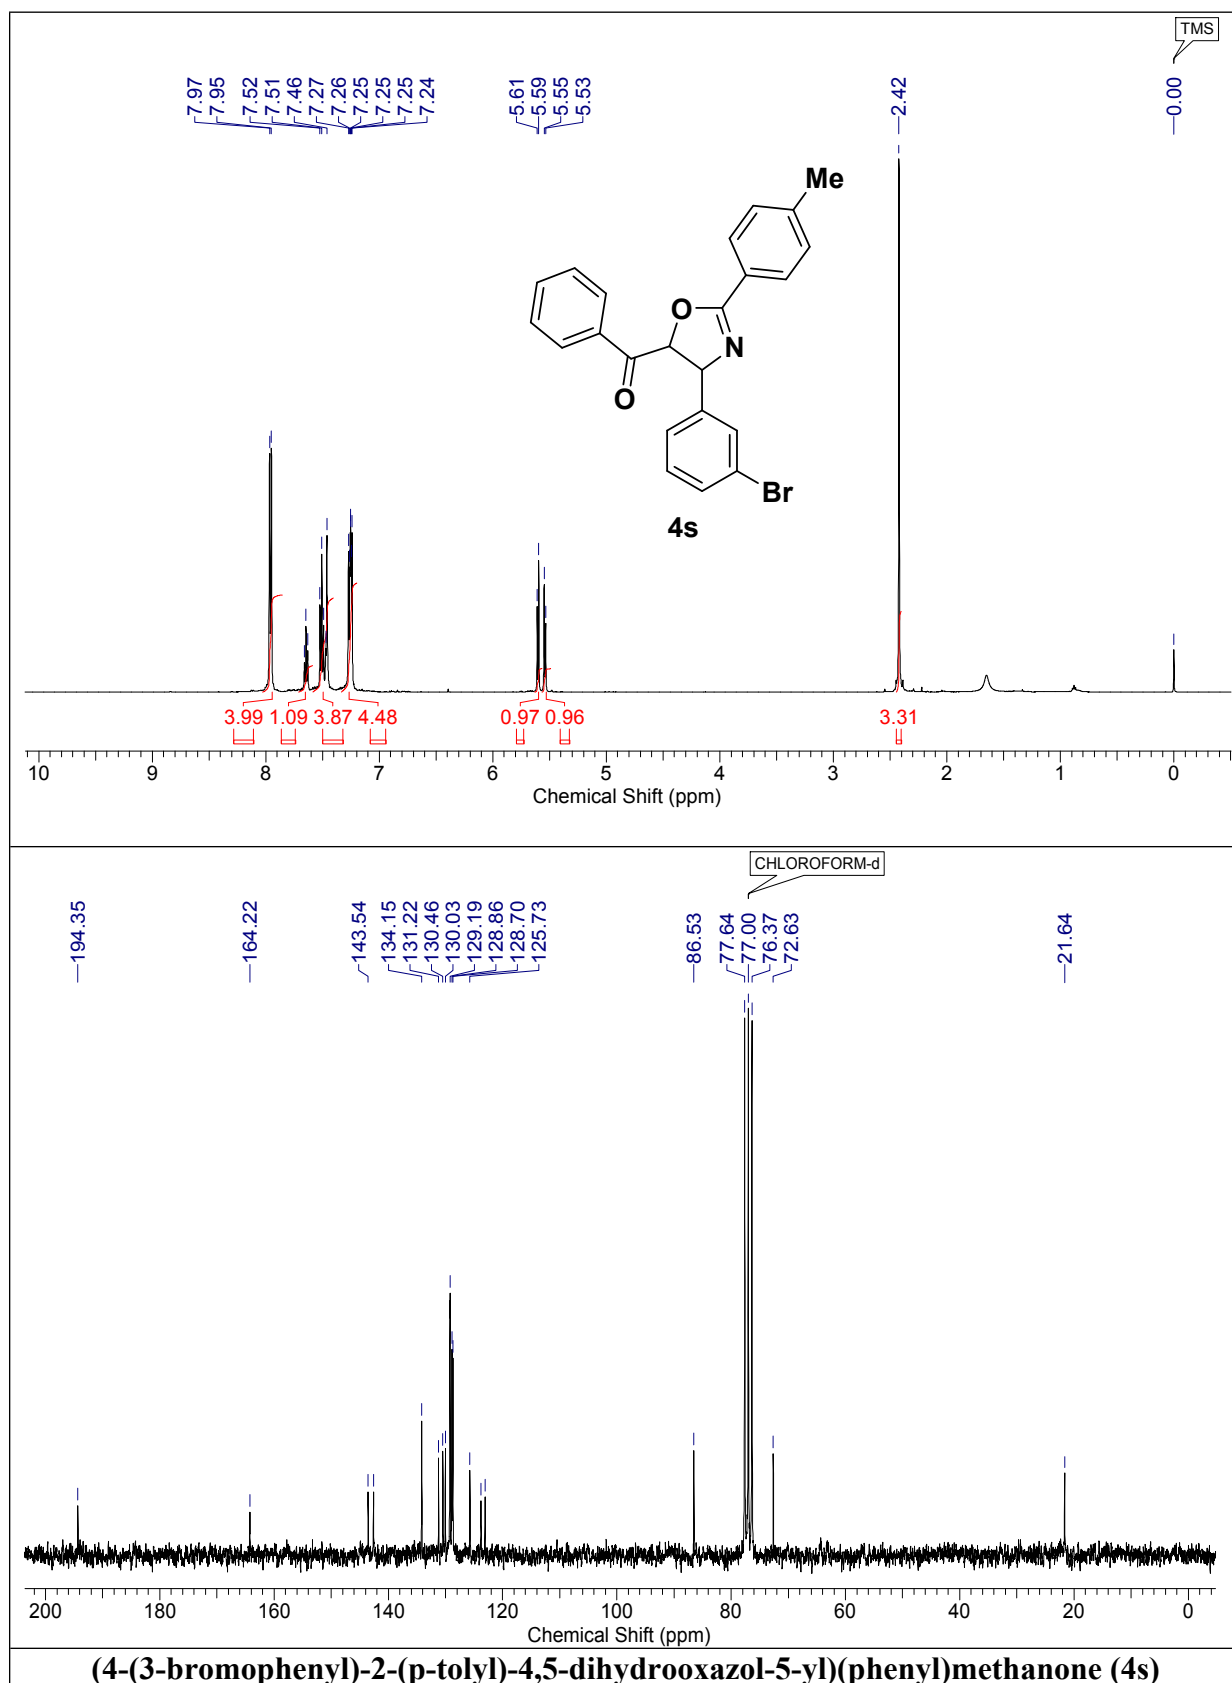

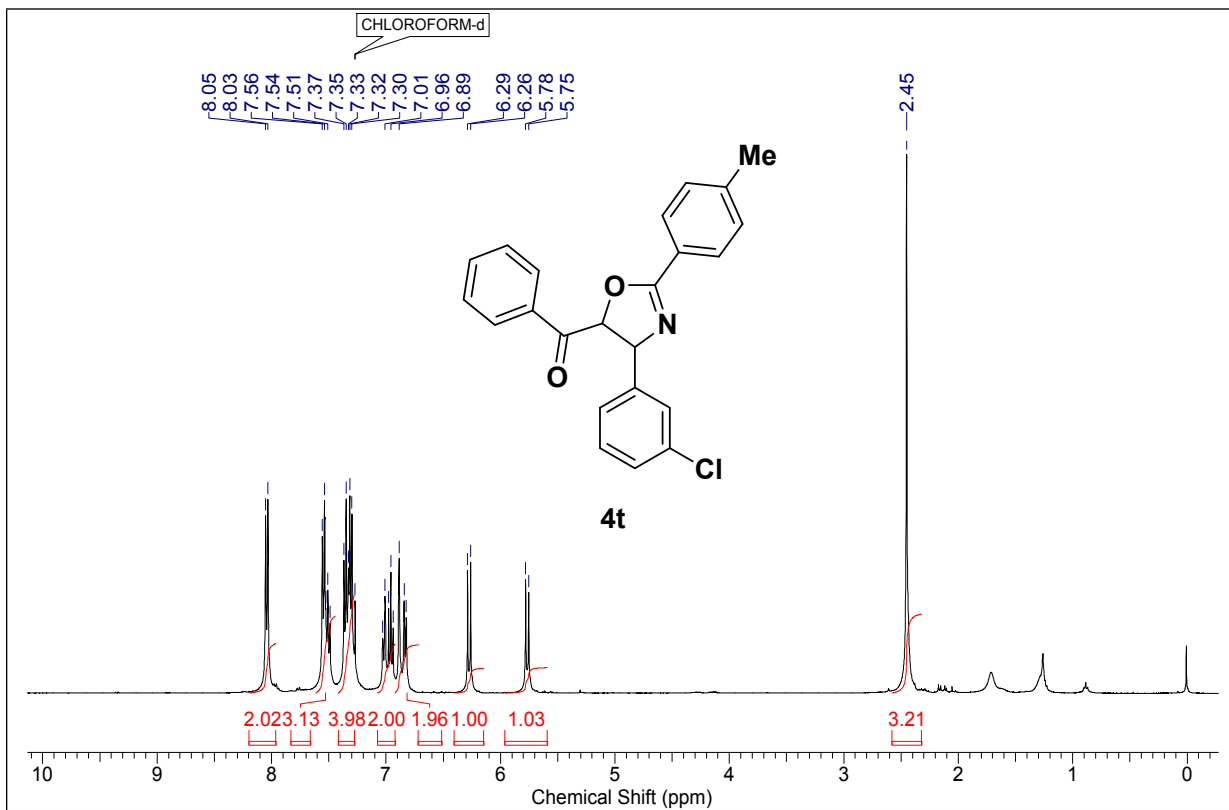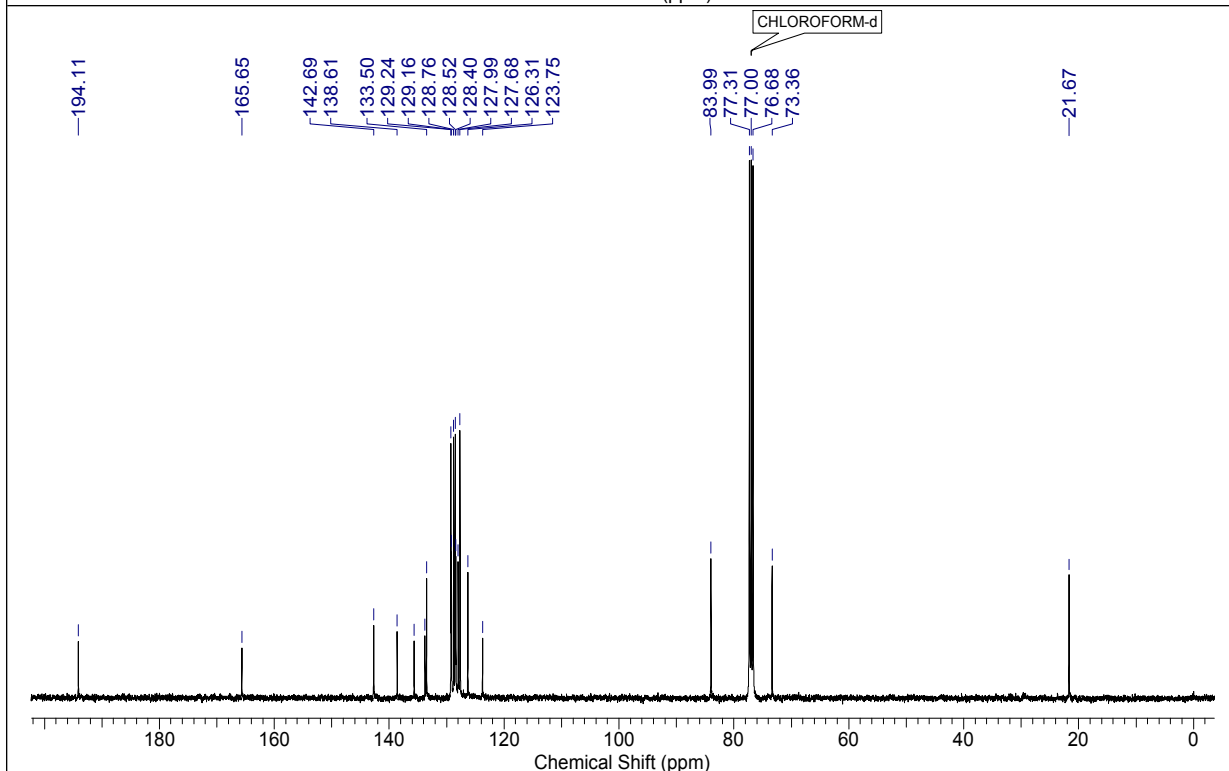

**(4-(3-chlorophenyl)-2-(p-tolyl)-4,5-dihydrooxazol-5-yl)(phenyl)methanone (4t)**

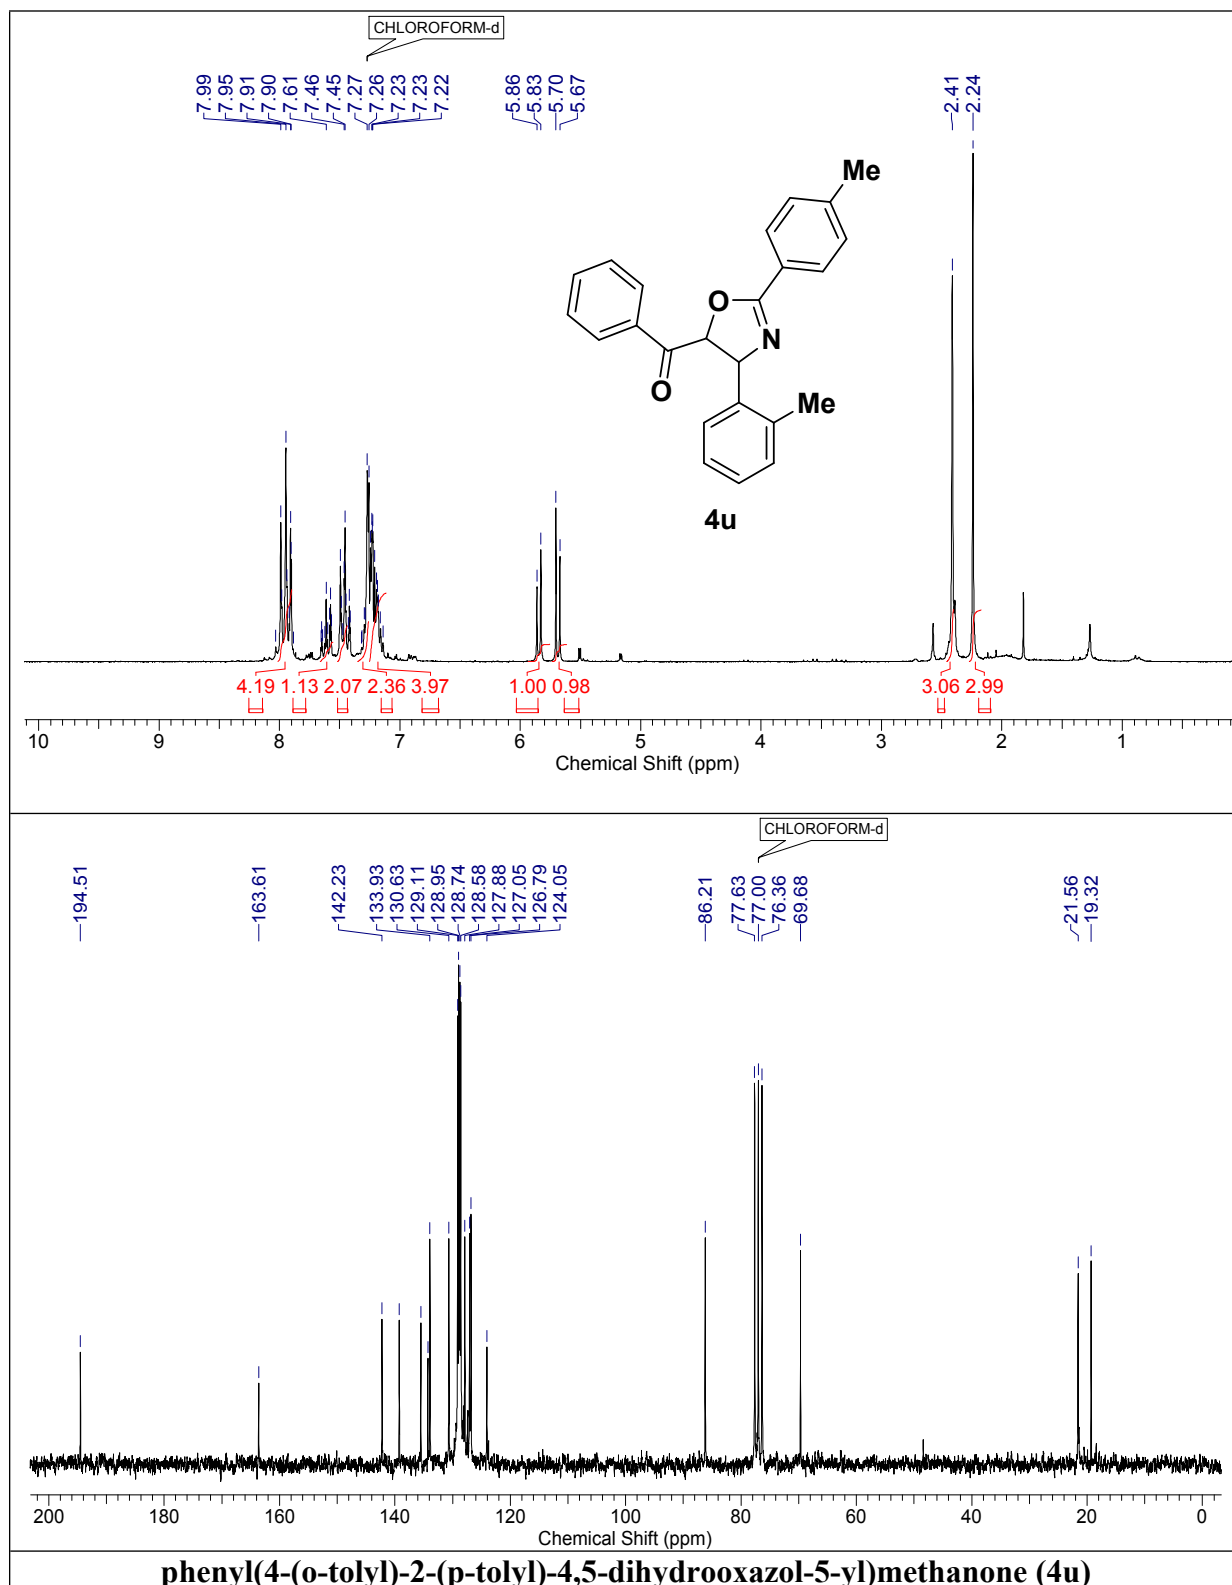

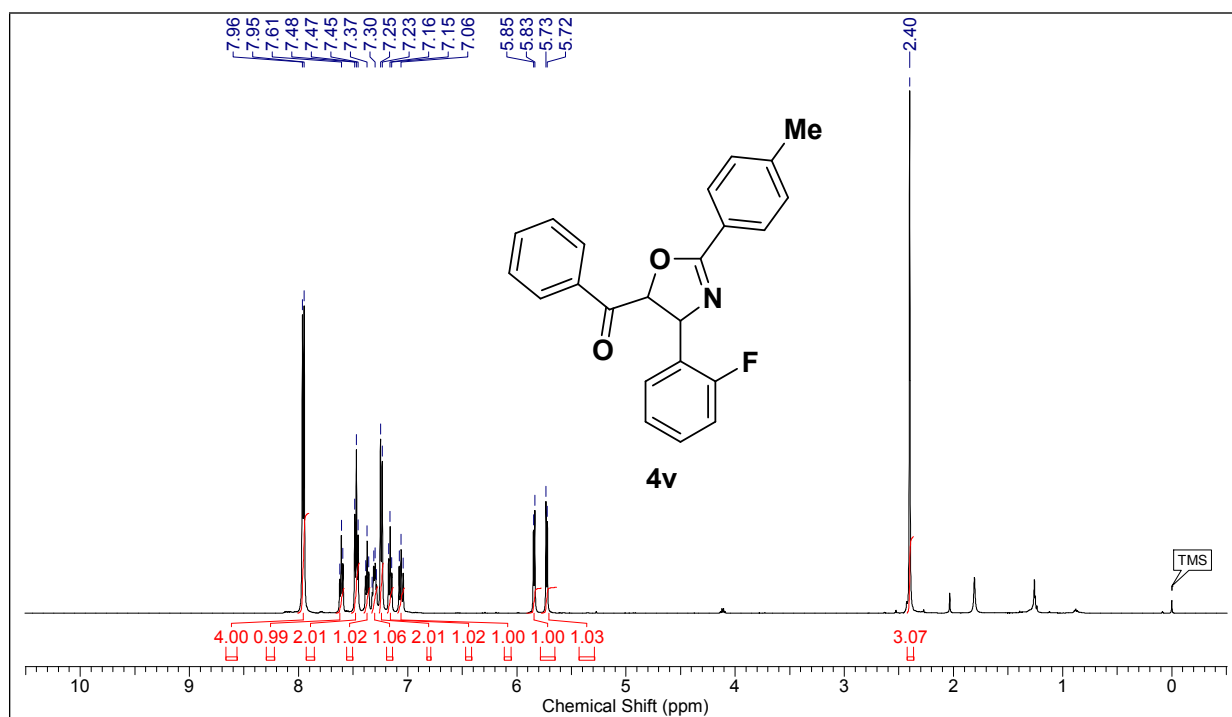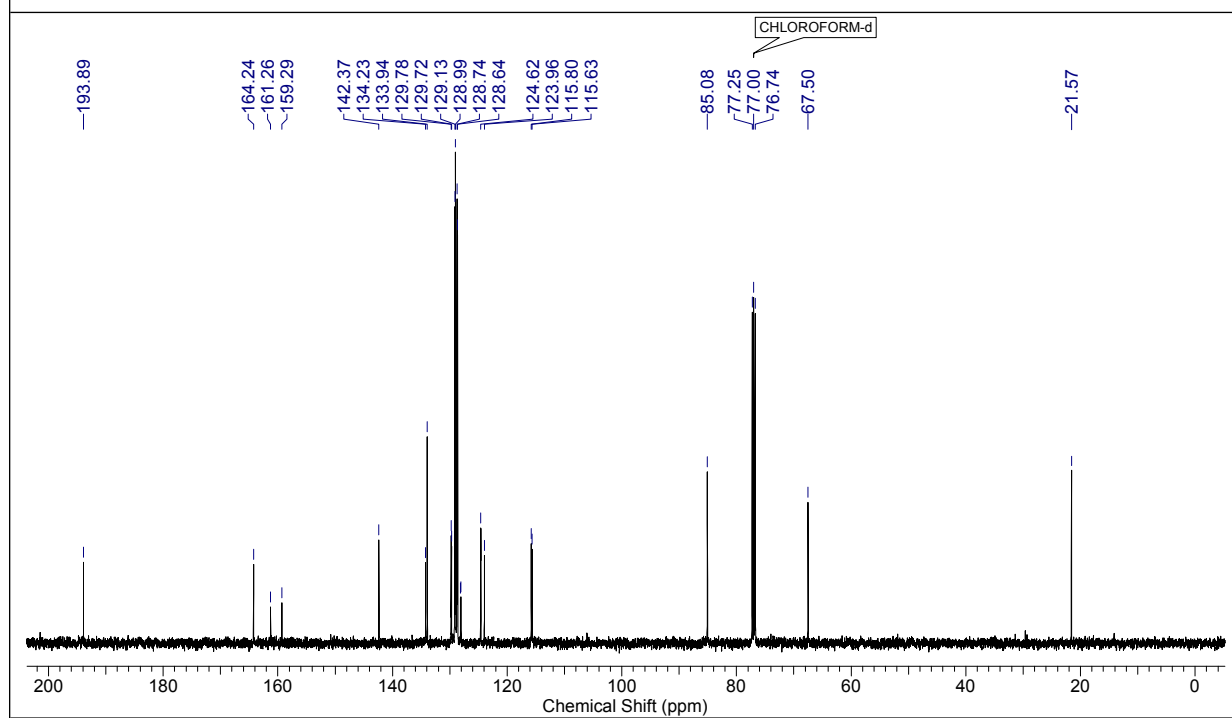

**(4-(2-fluorophenyl)-2-(p-tolyl)-4,5-dihydrooxazol-5-yl)(phenyl)methanone (4v)**

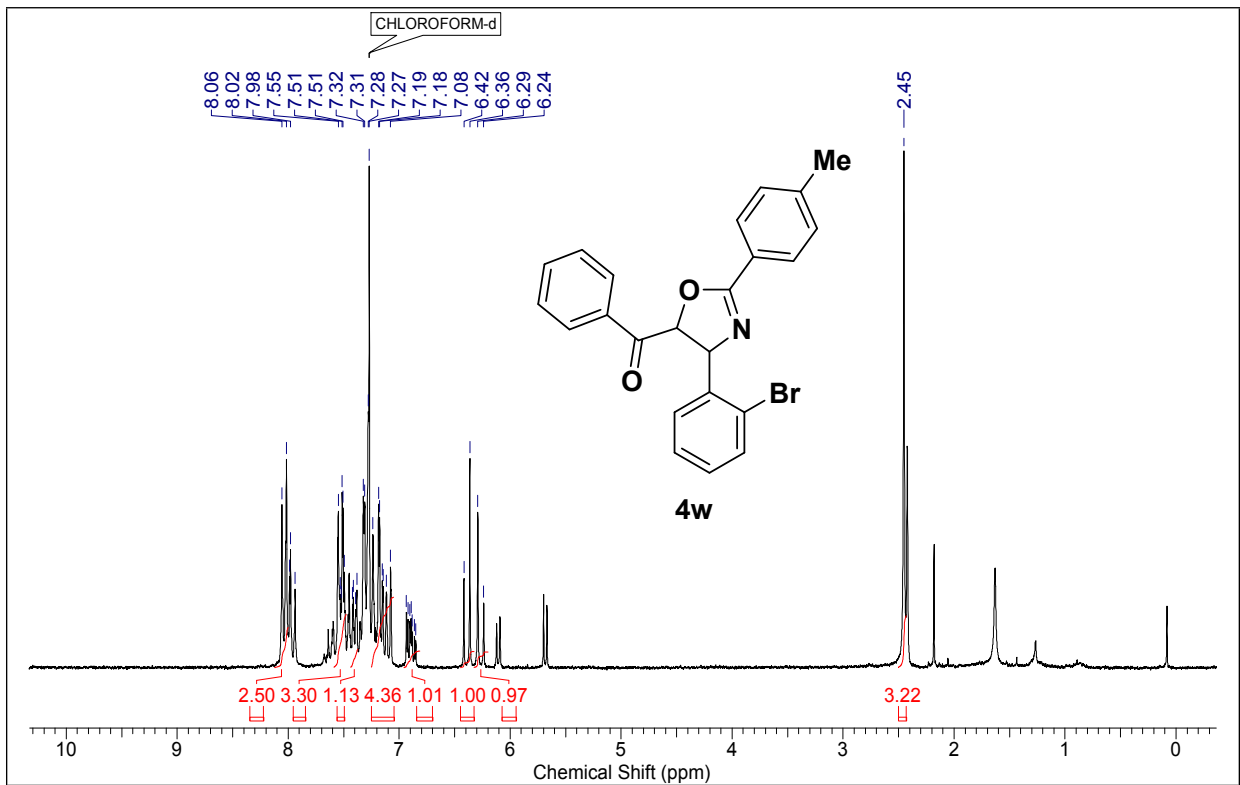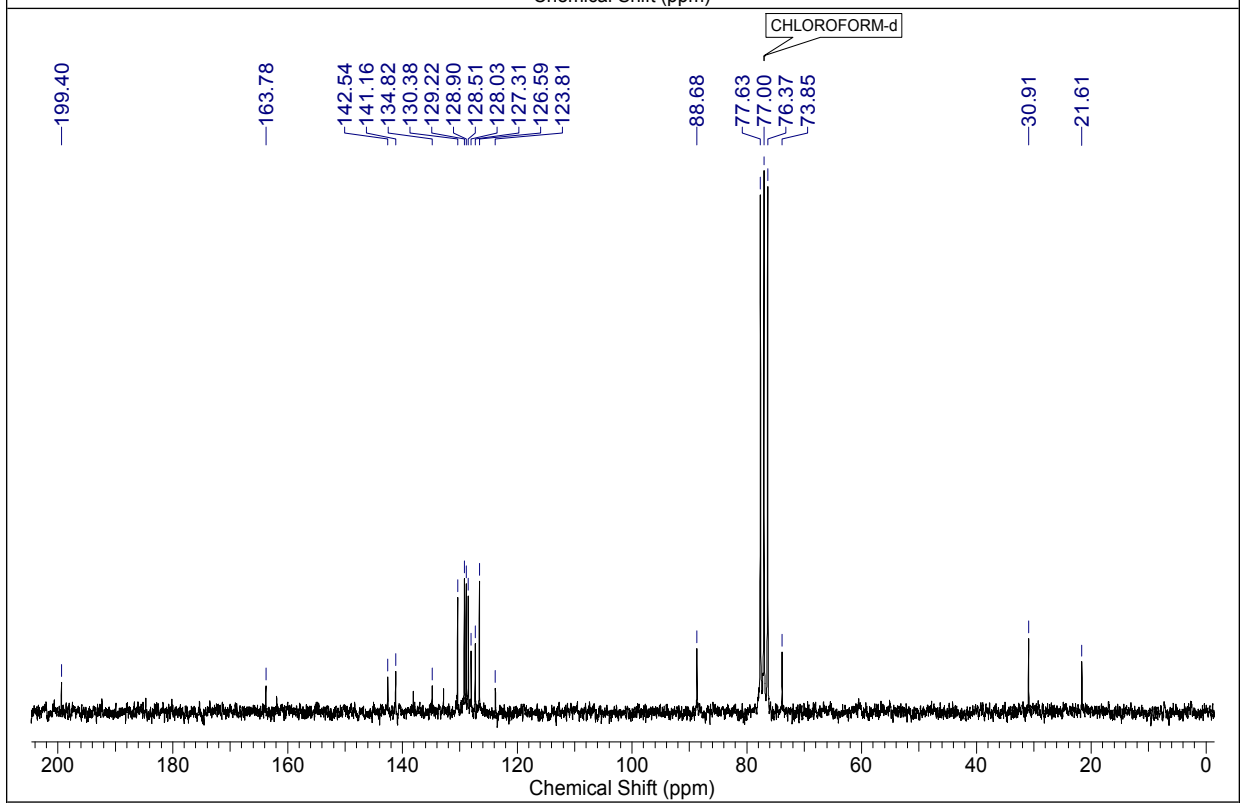

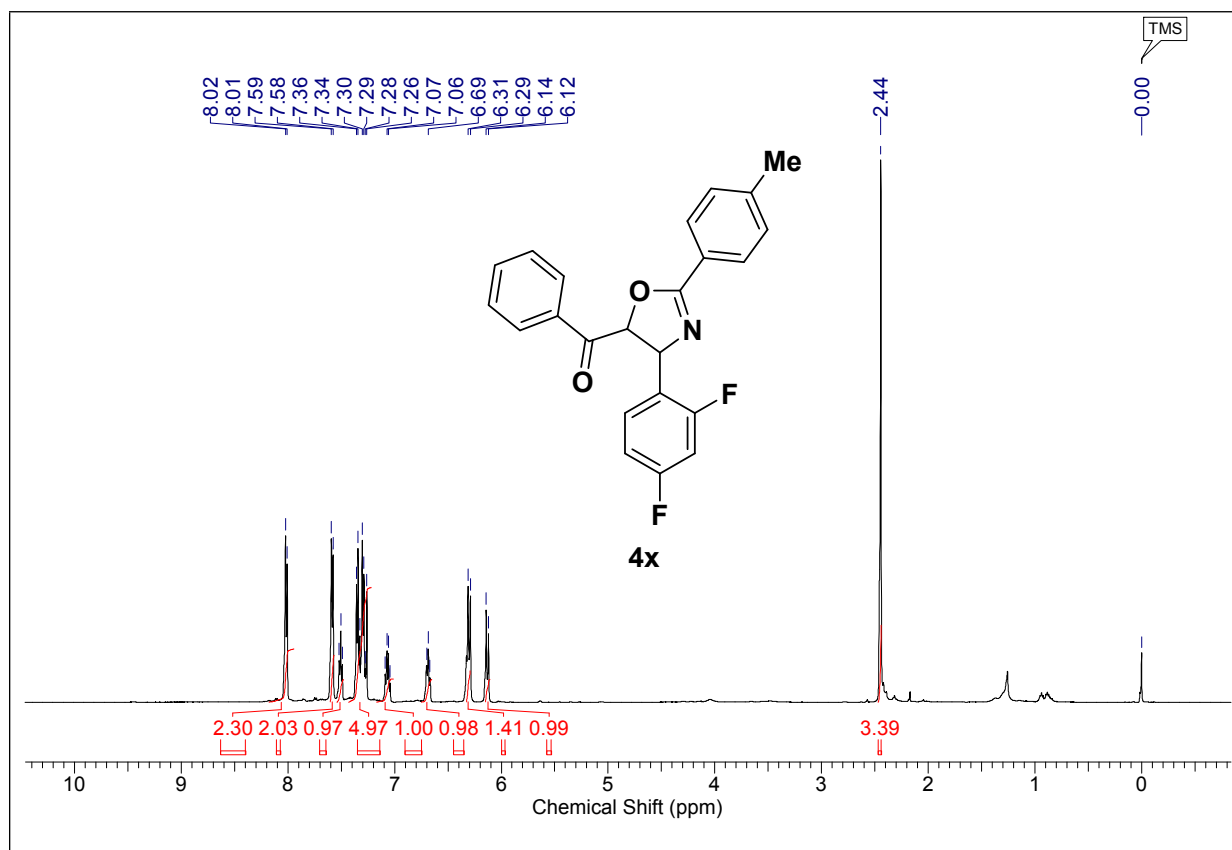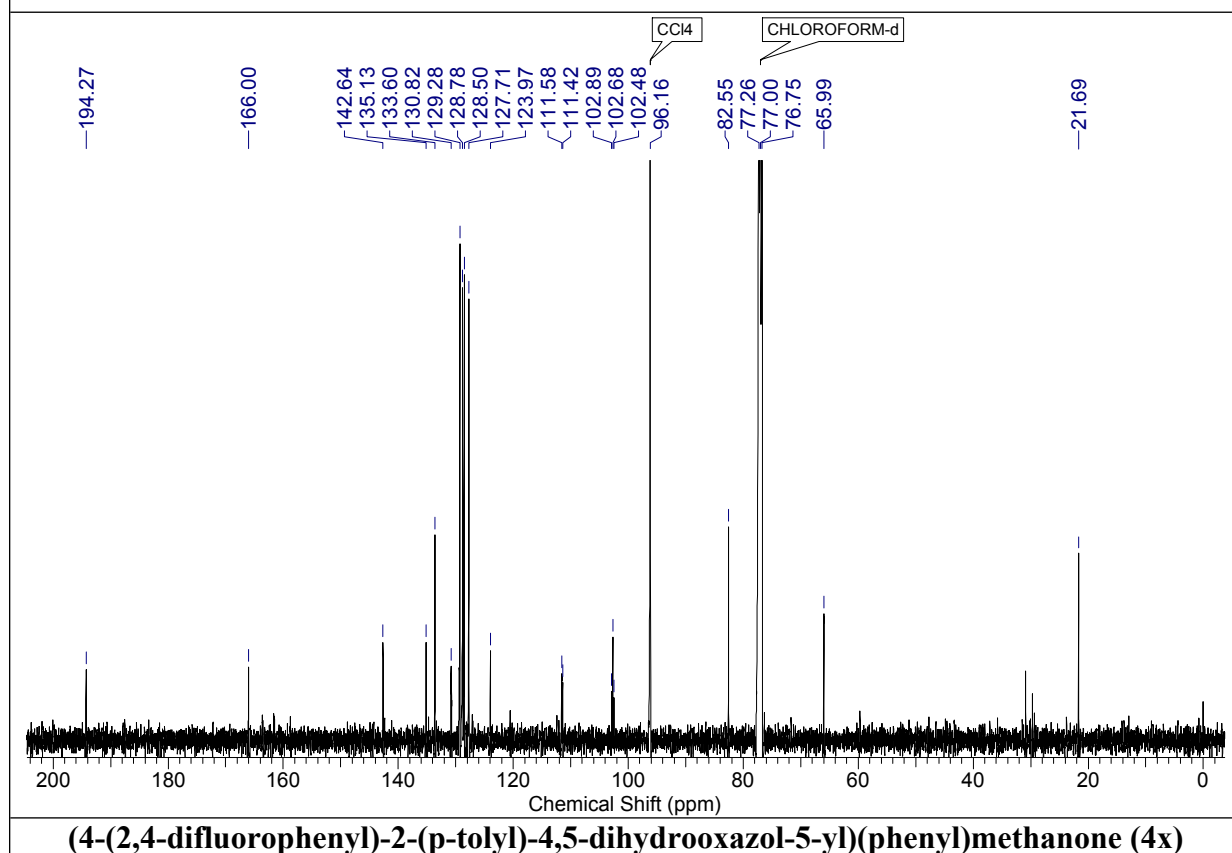



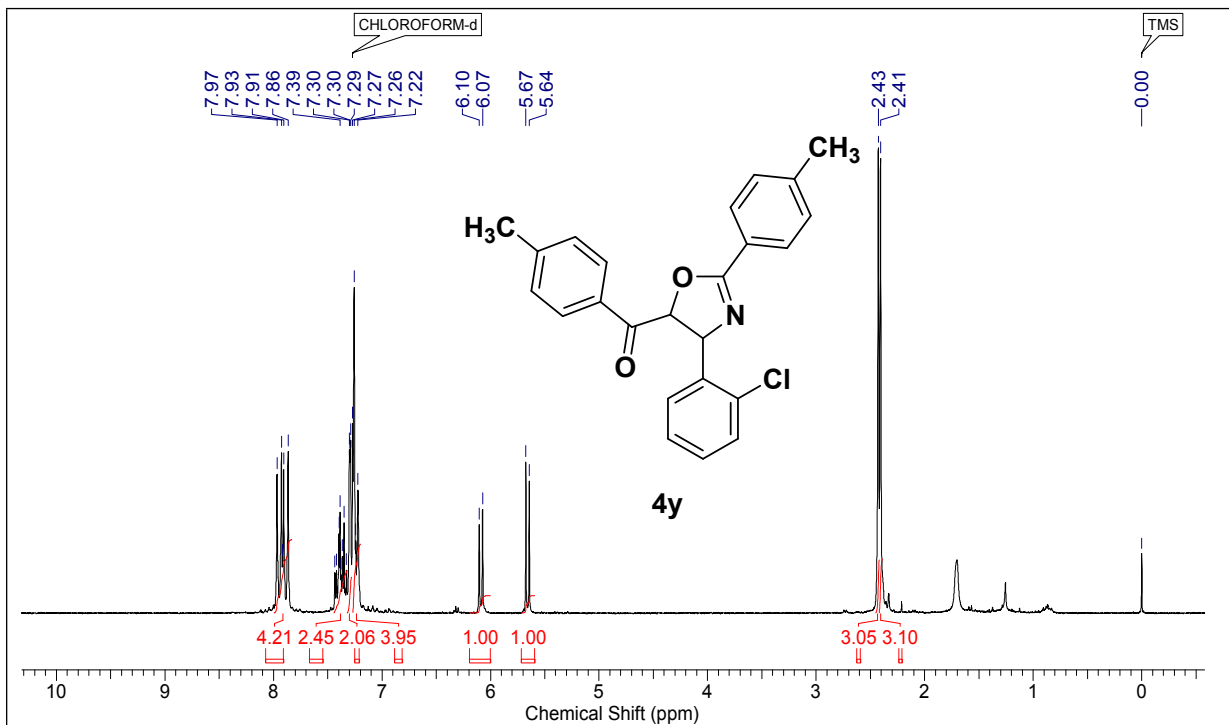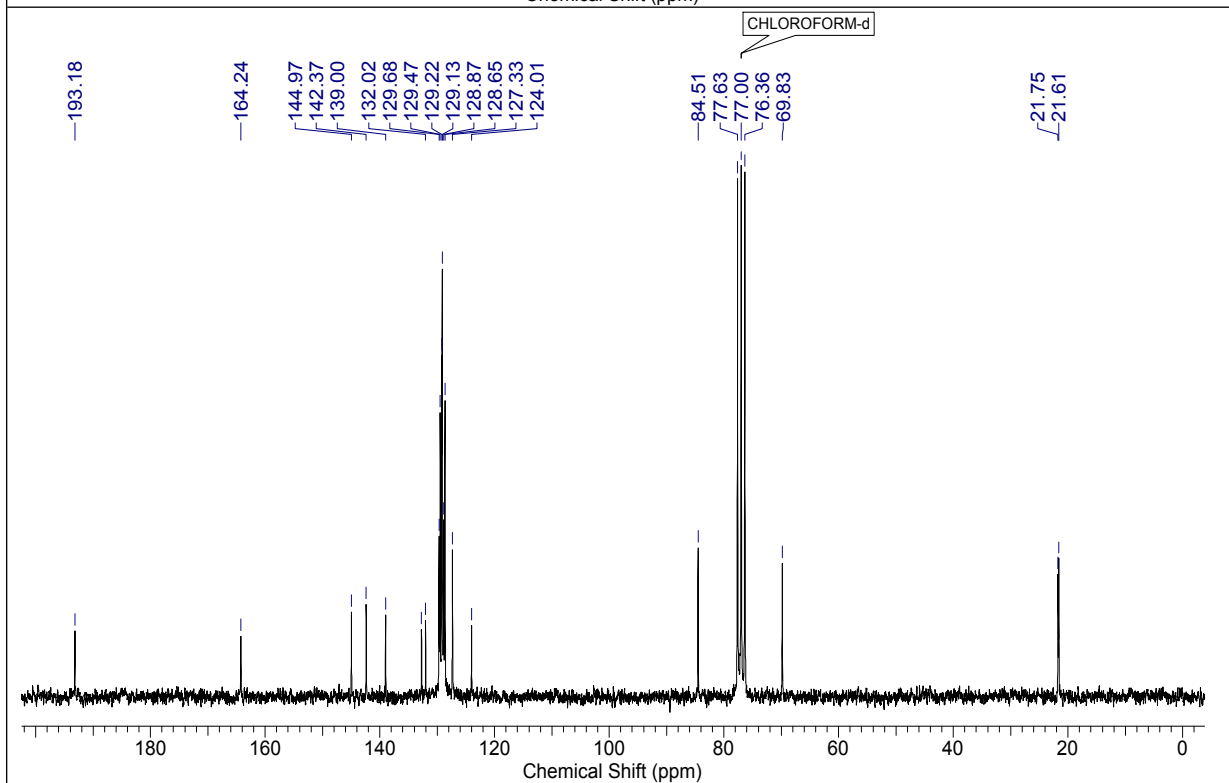

**(4-(2-chlorophenyl)-2-(p-tolyl)-4,5-dihydrooxazol-5-yl)(p-tolyl)methanone (4y)**

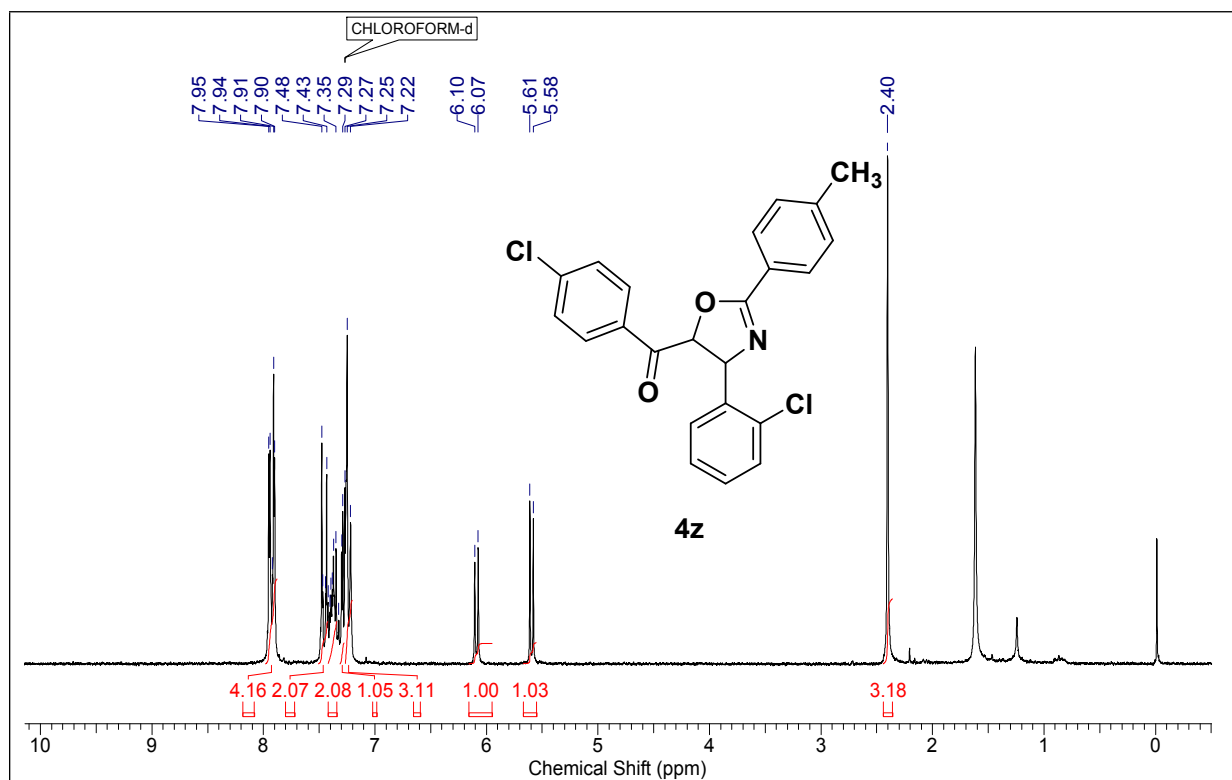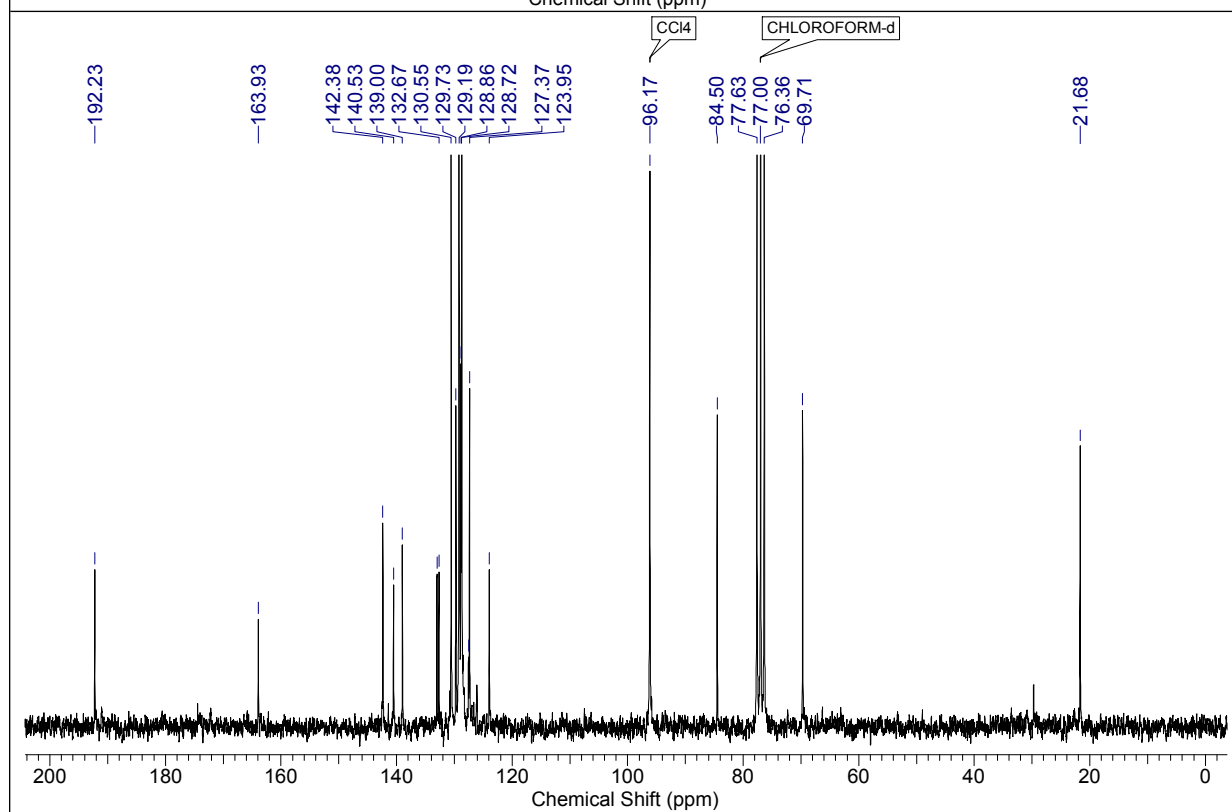

**(4-chlorophenyl)(4-(2-chlorophenyl)-2-(p-tolyl)-4,5-dihydrooxazol-5-yl)methanone (4z)**

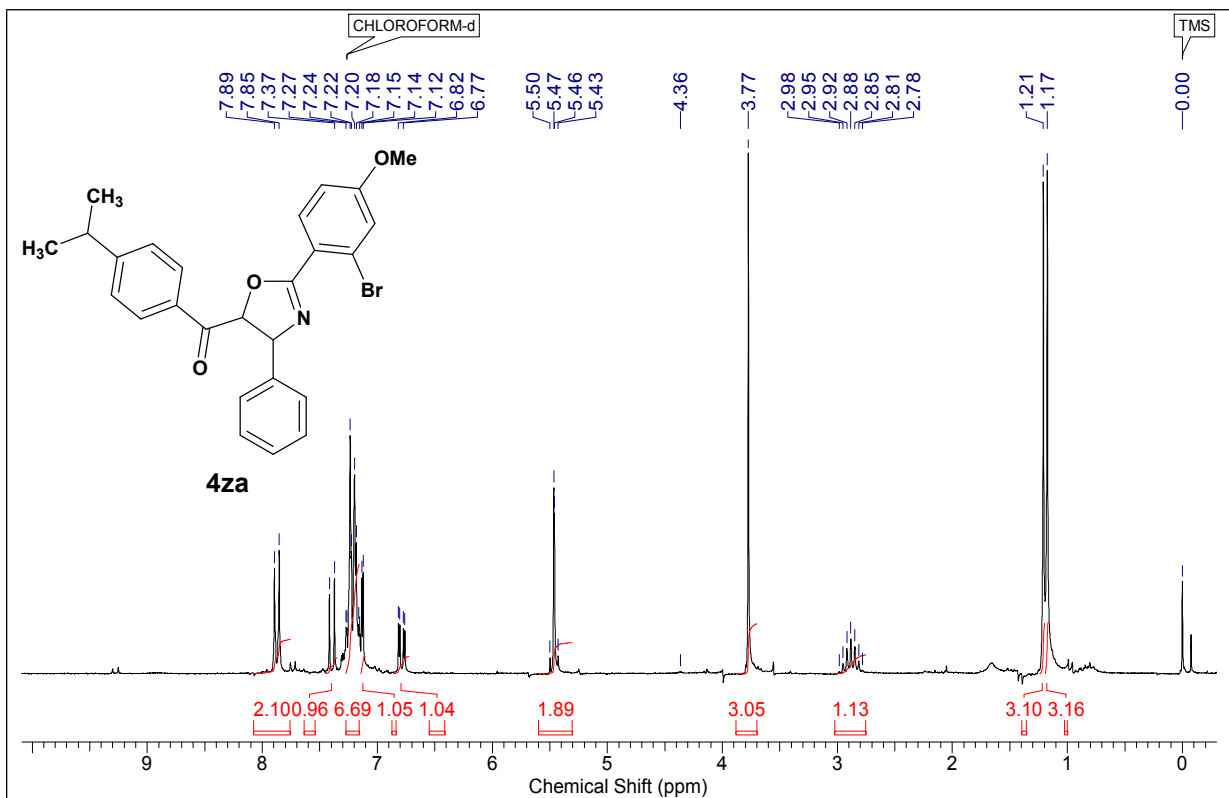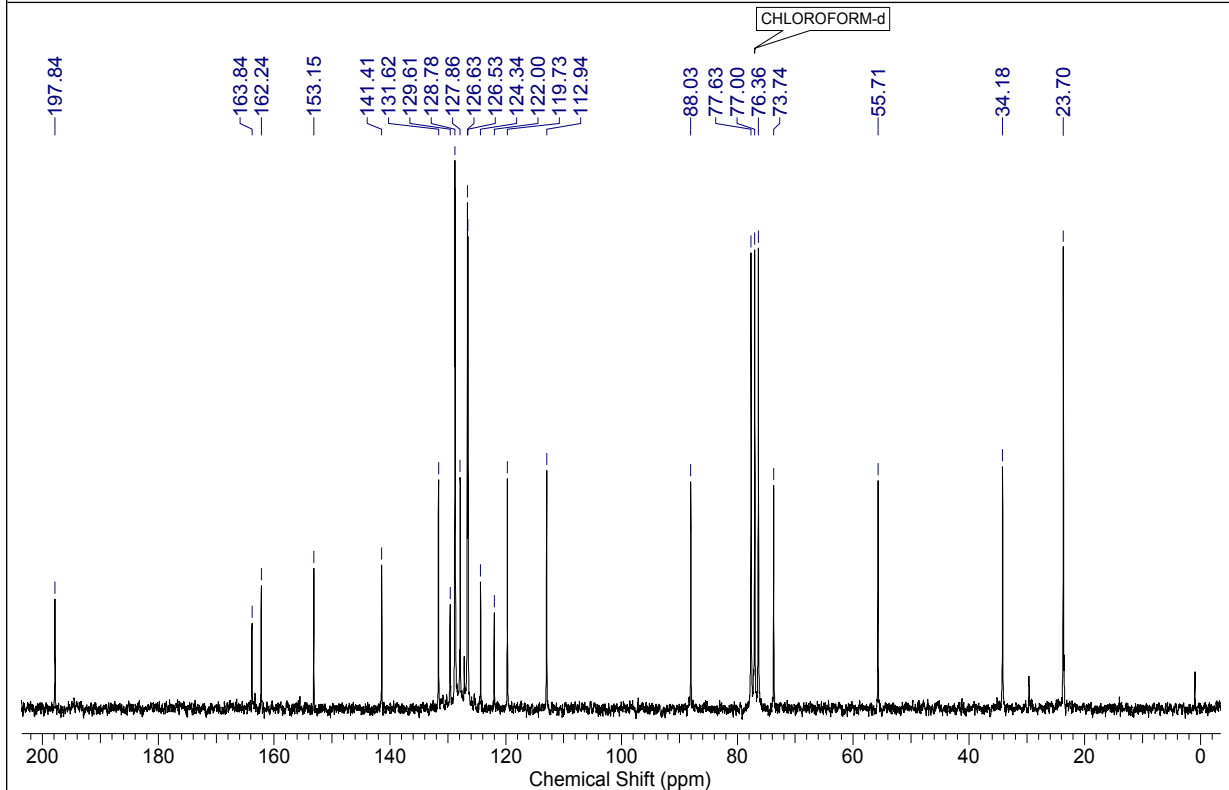

**(2-(2-bromo-4-methoxyphenyl)-4-phenyl-4,5-dihydrooxazol-5-yl)(4-isopropylphenyl)methanone (4za)**

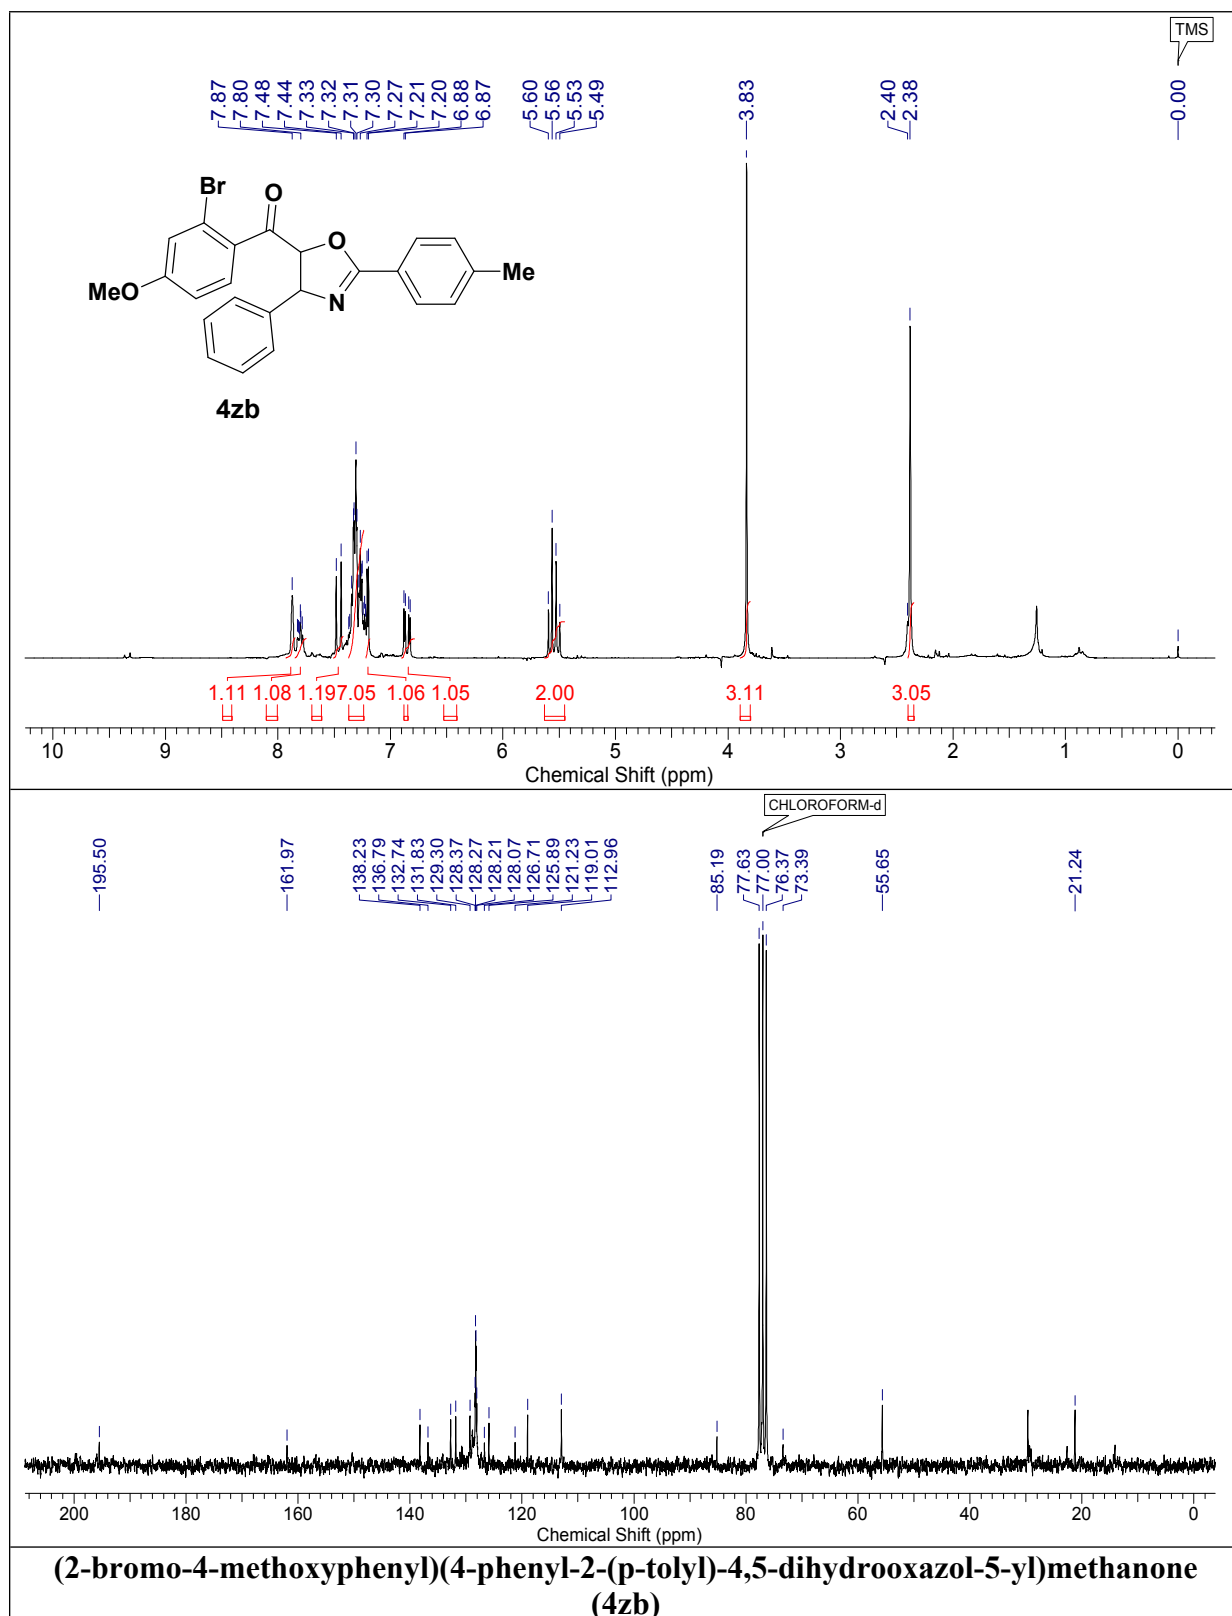

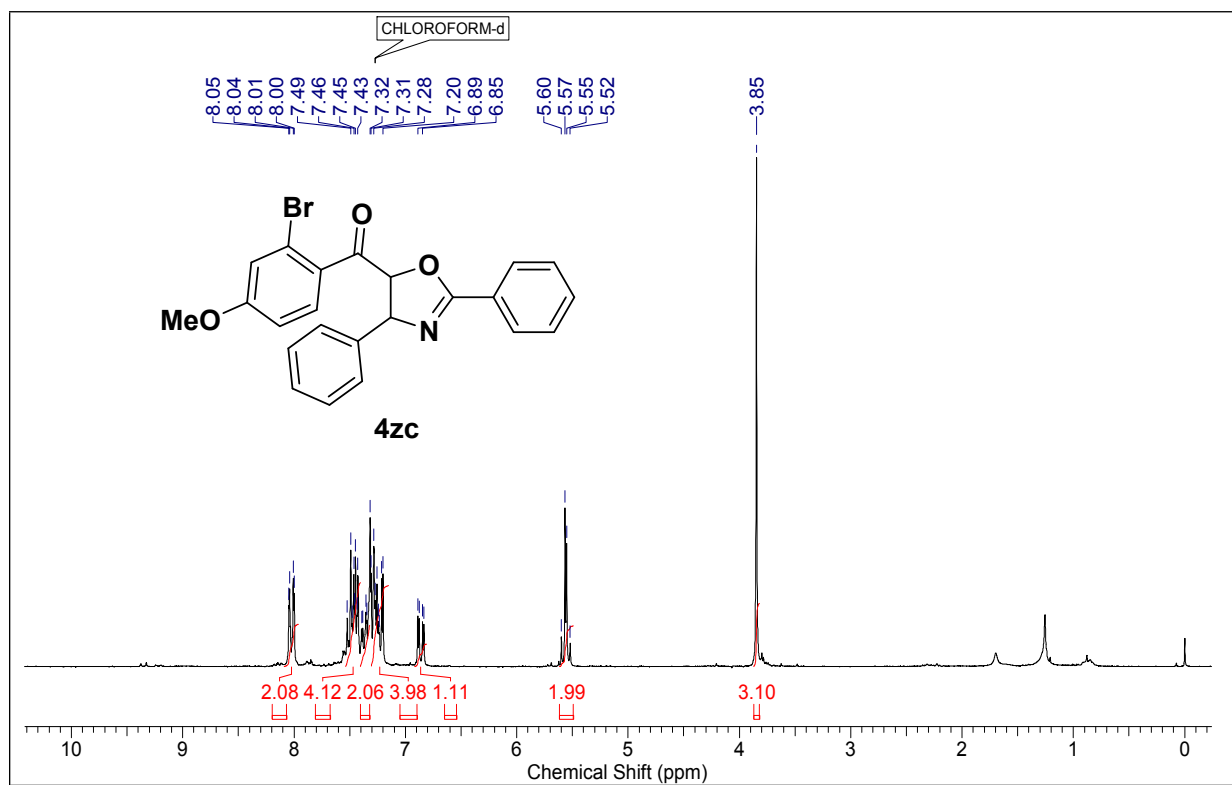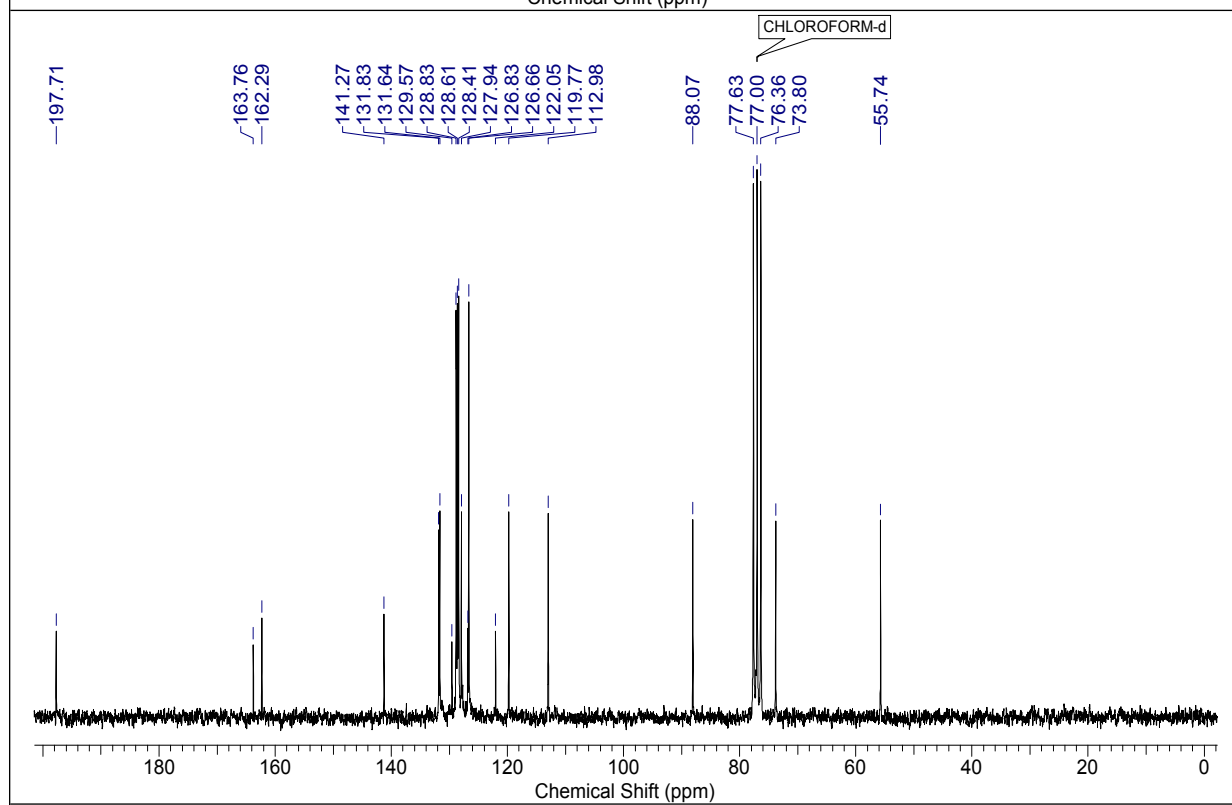

**(2-bromo-4-methoxyphenyl)(2,4-diphenyl-4,5-dihydrooxazol-5-yl)methanone (4zc)**

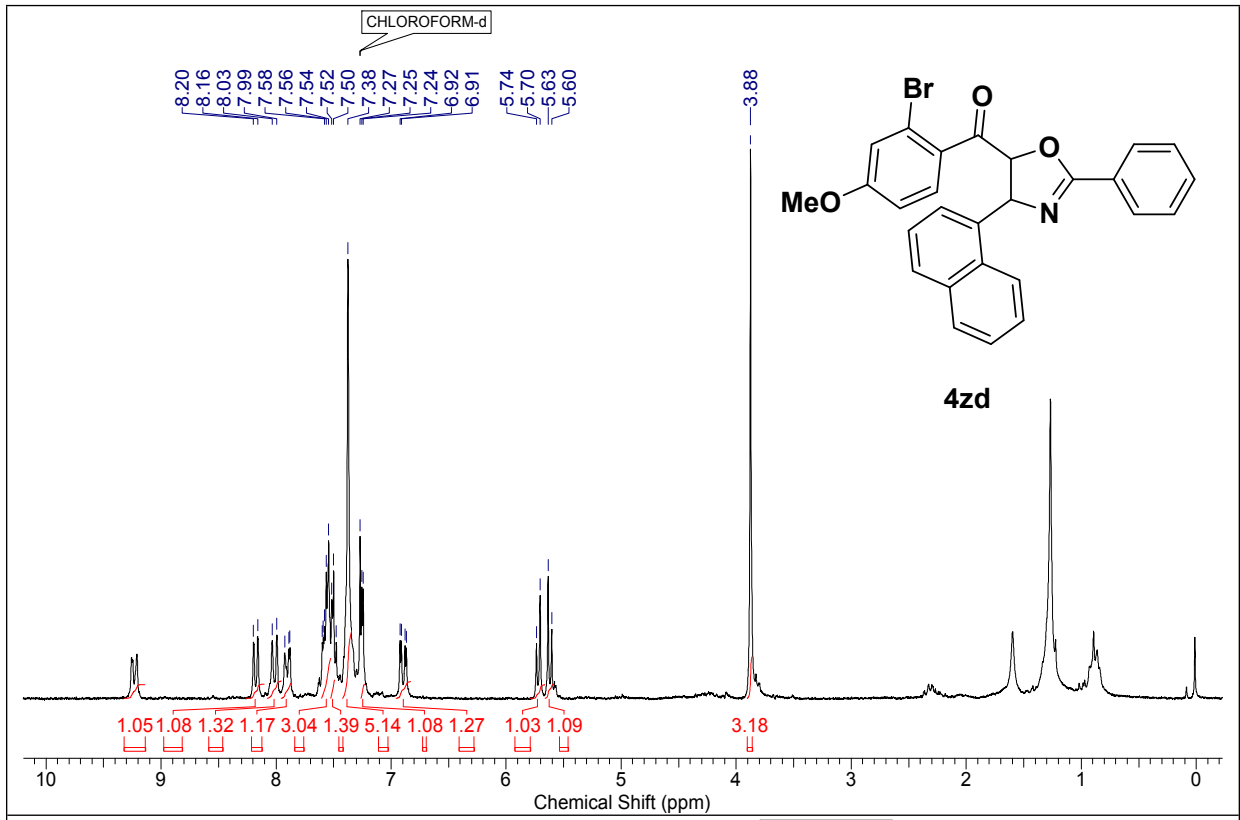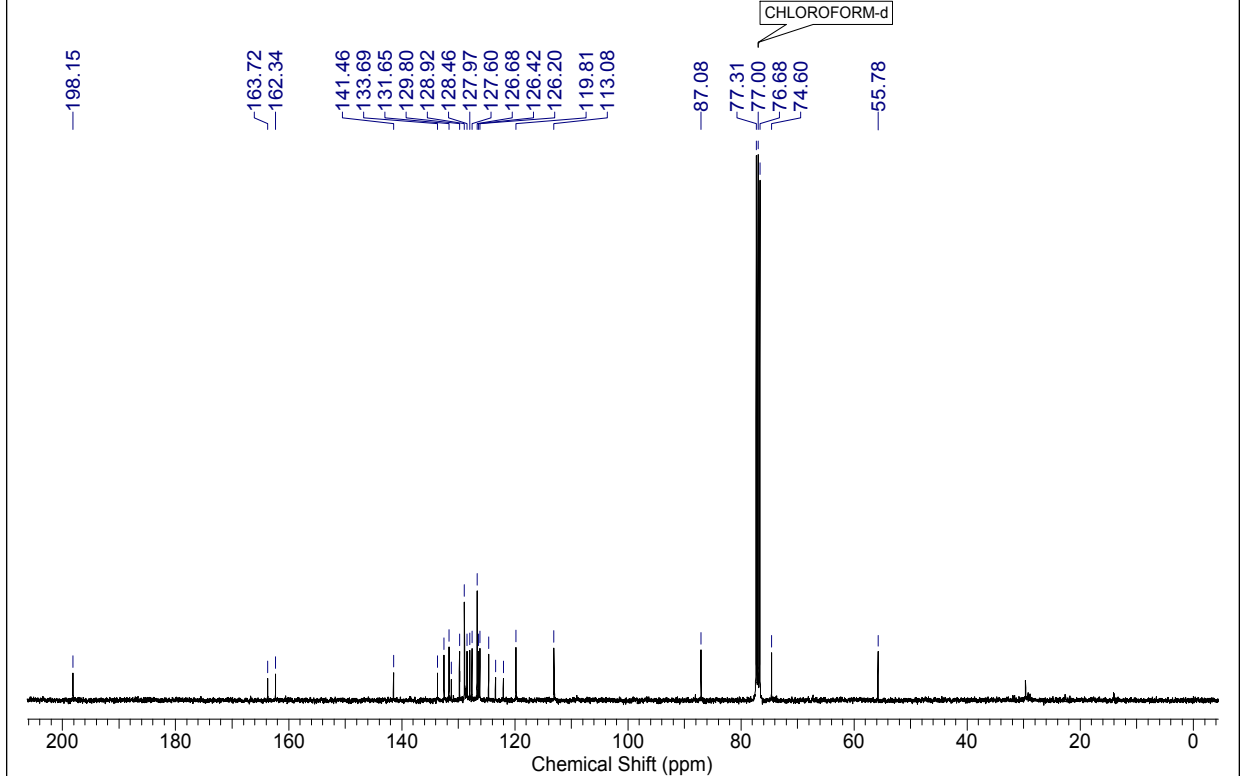

**(2-bromo-4-methoxyphenyl)(4-(naphthalen-1-yl)-2-phenyl-4,5-dihydrooxazol-5-yl)methanone (4zd)**

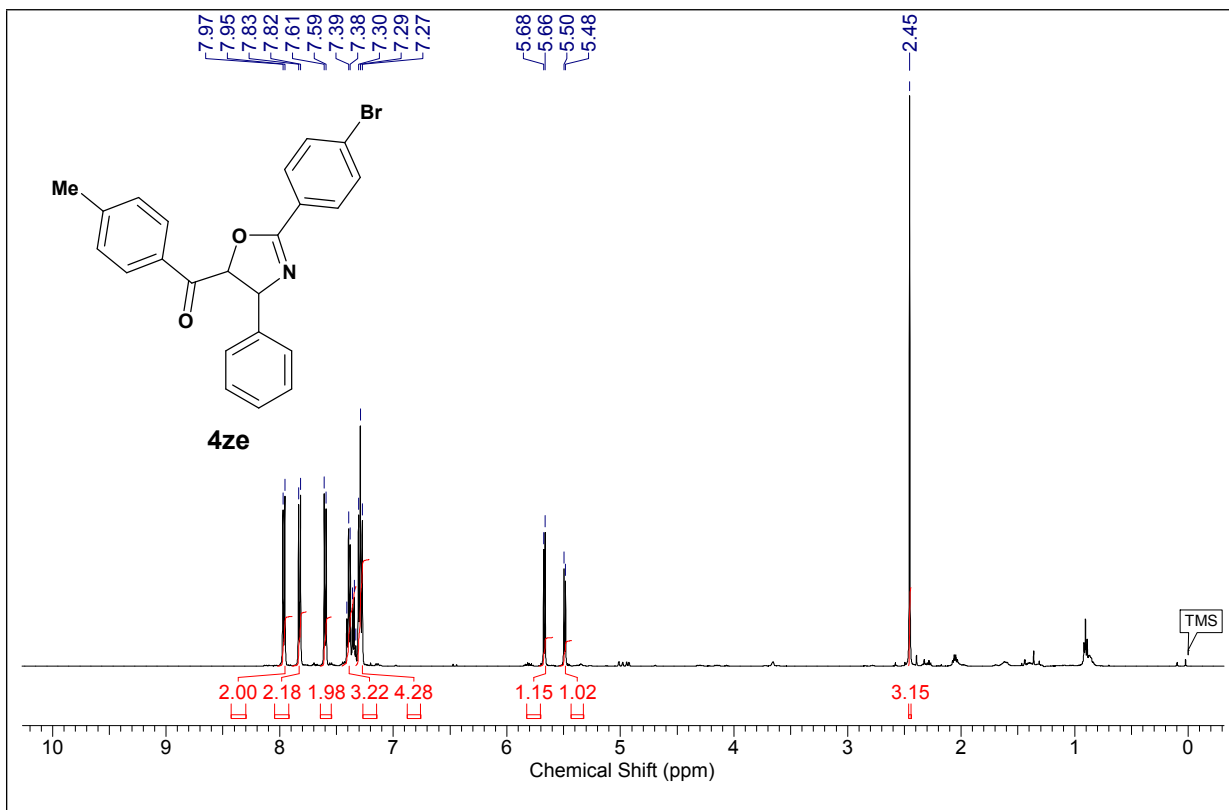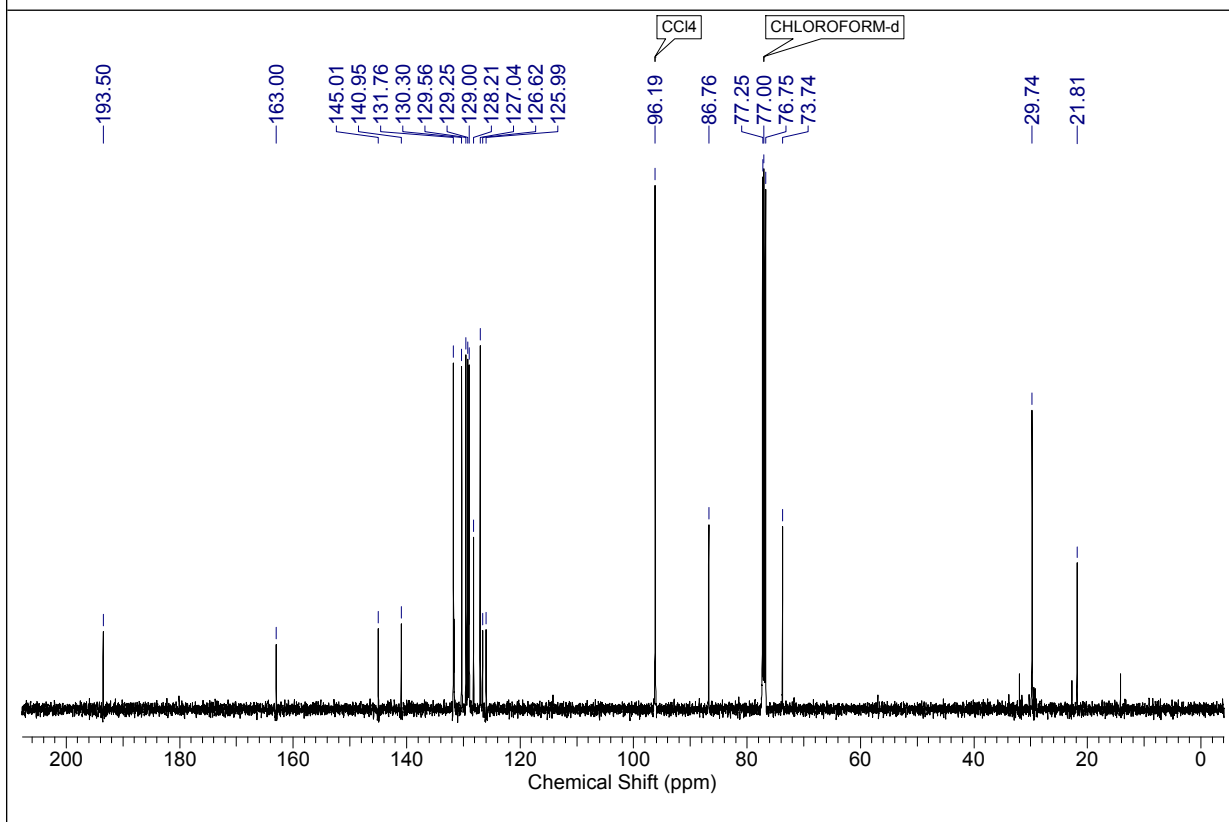

**(2-(4-bromophenyl)-4-phenyl-4,5-dihydrooxazol-5-yl)(p-tolyl)methanone (4ze)**

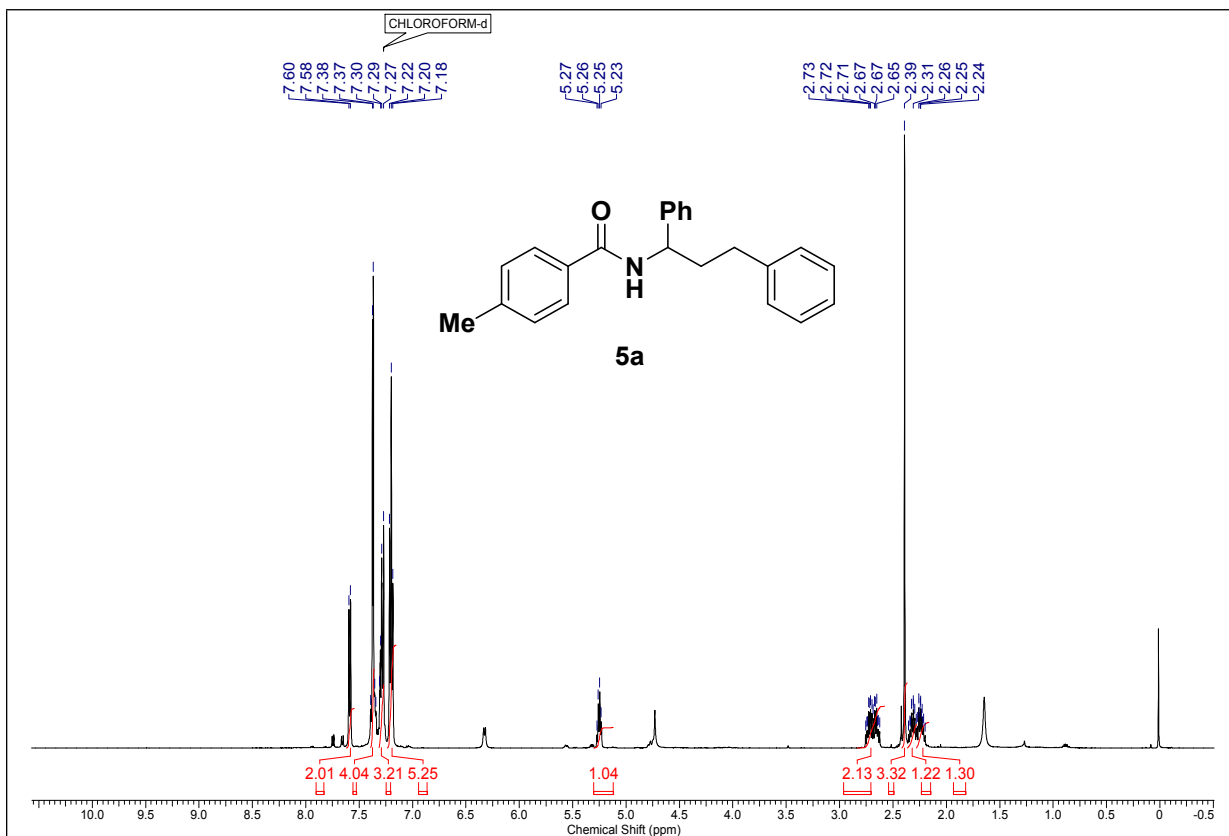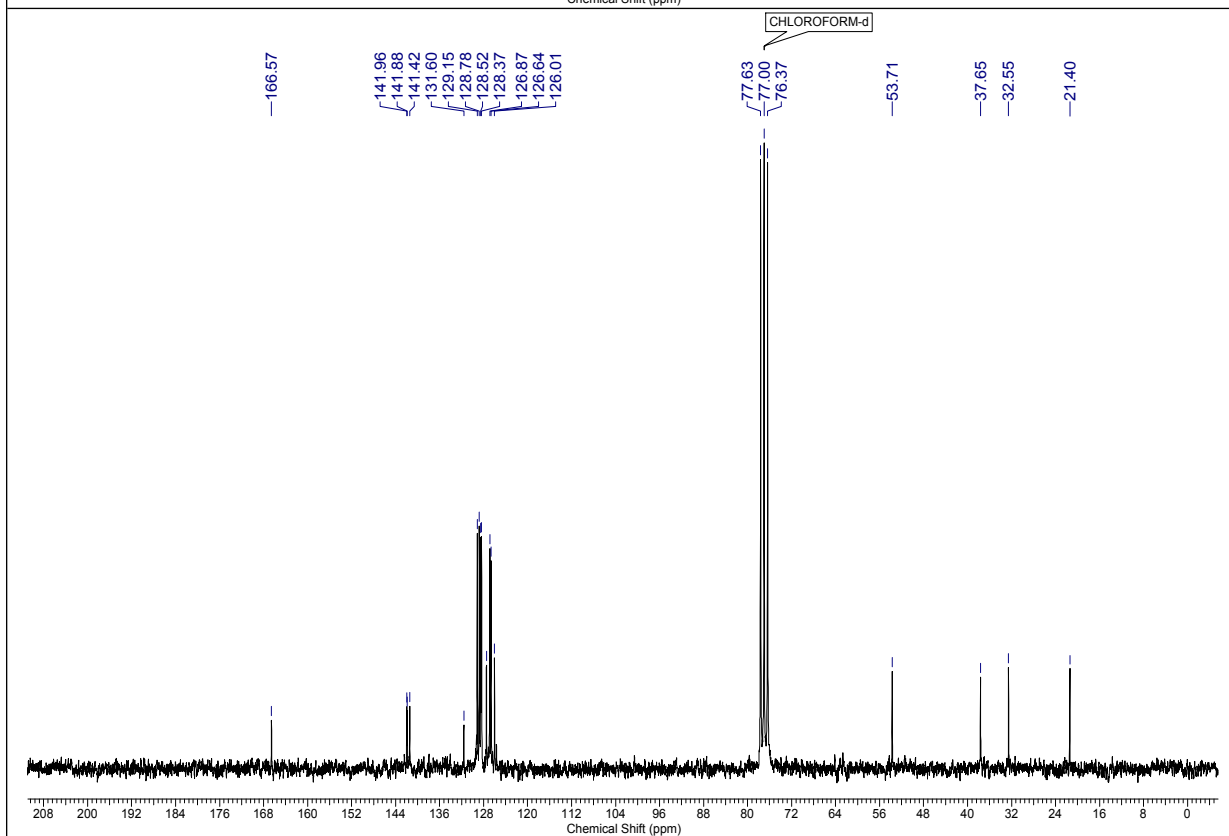

**N-(1,3-diphenylpropyl)-4-methylbenzamide (5a)**



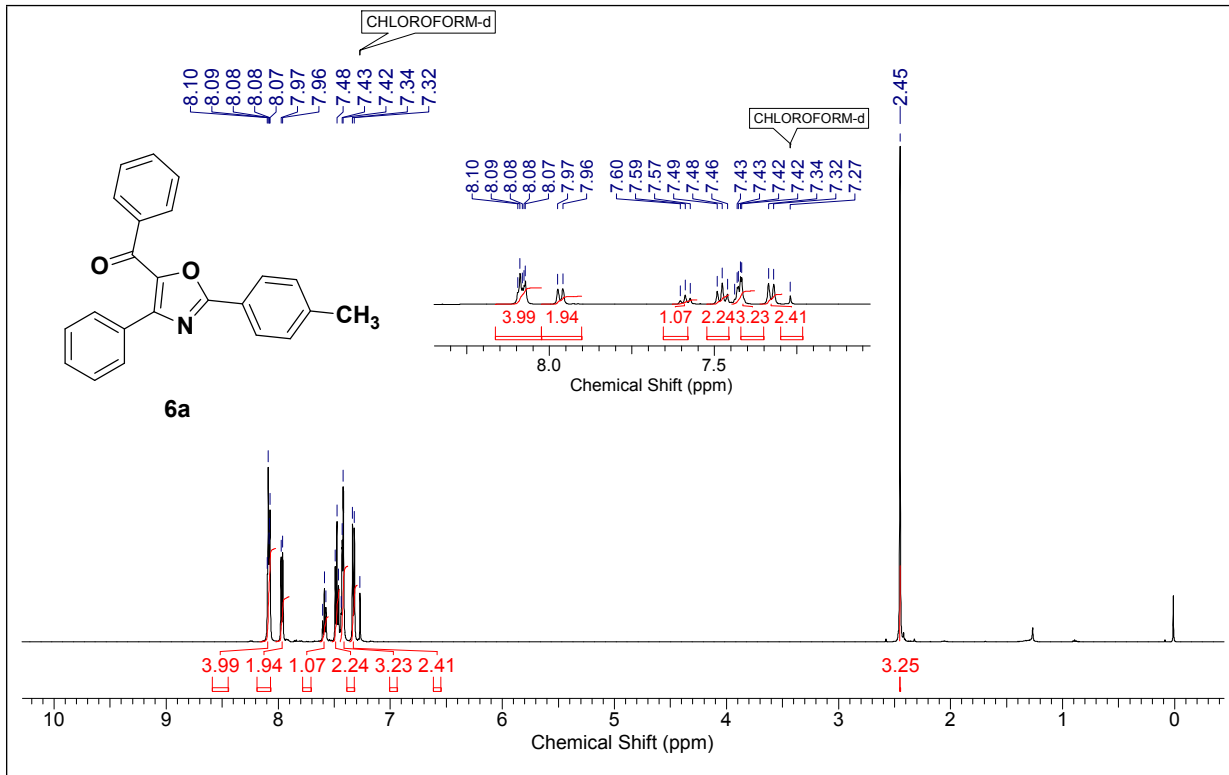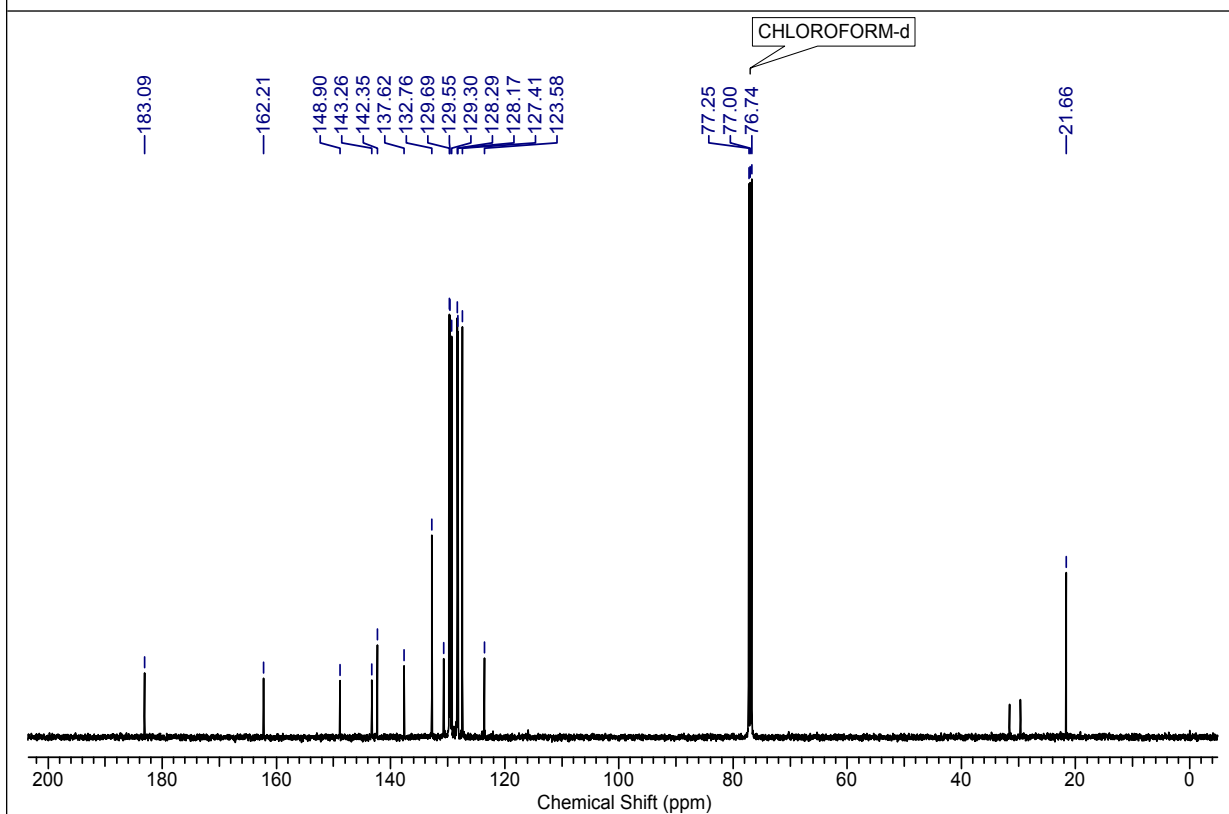

**phenyl(4-phenyl-2-(p-tolyl)oxazol-5-yl)methanone (6a)**

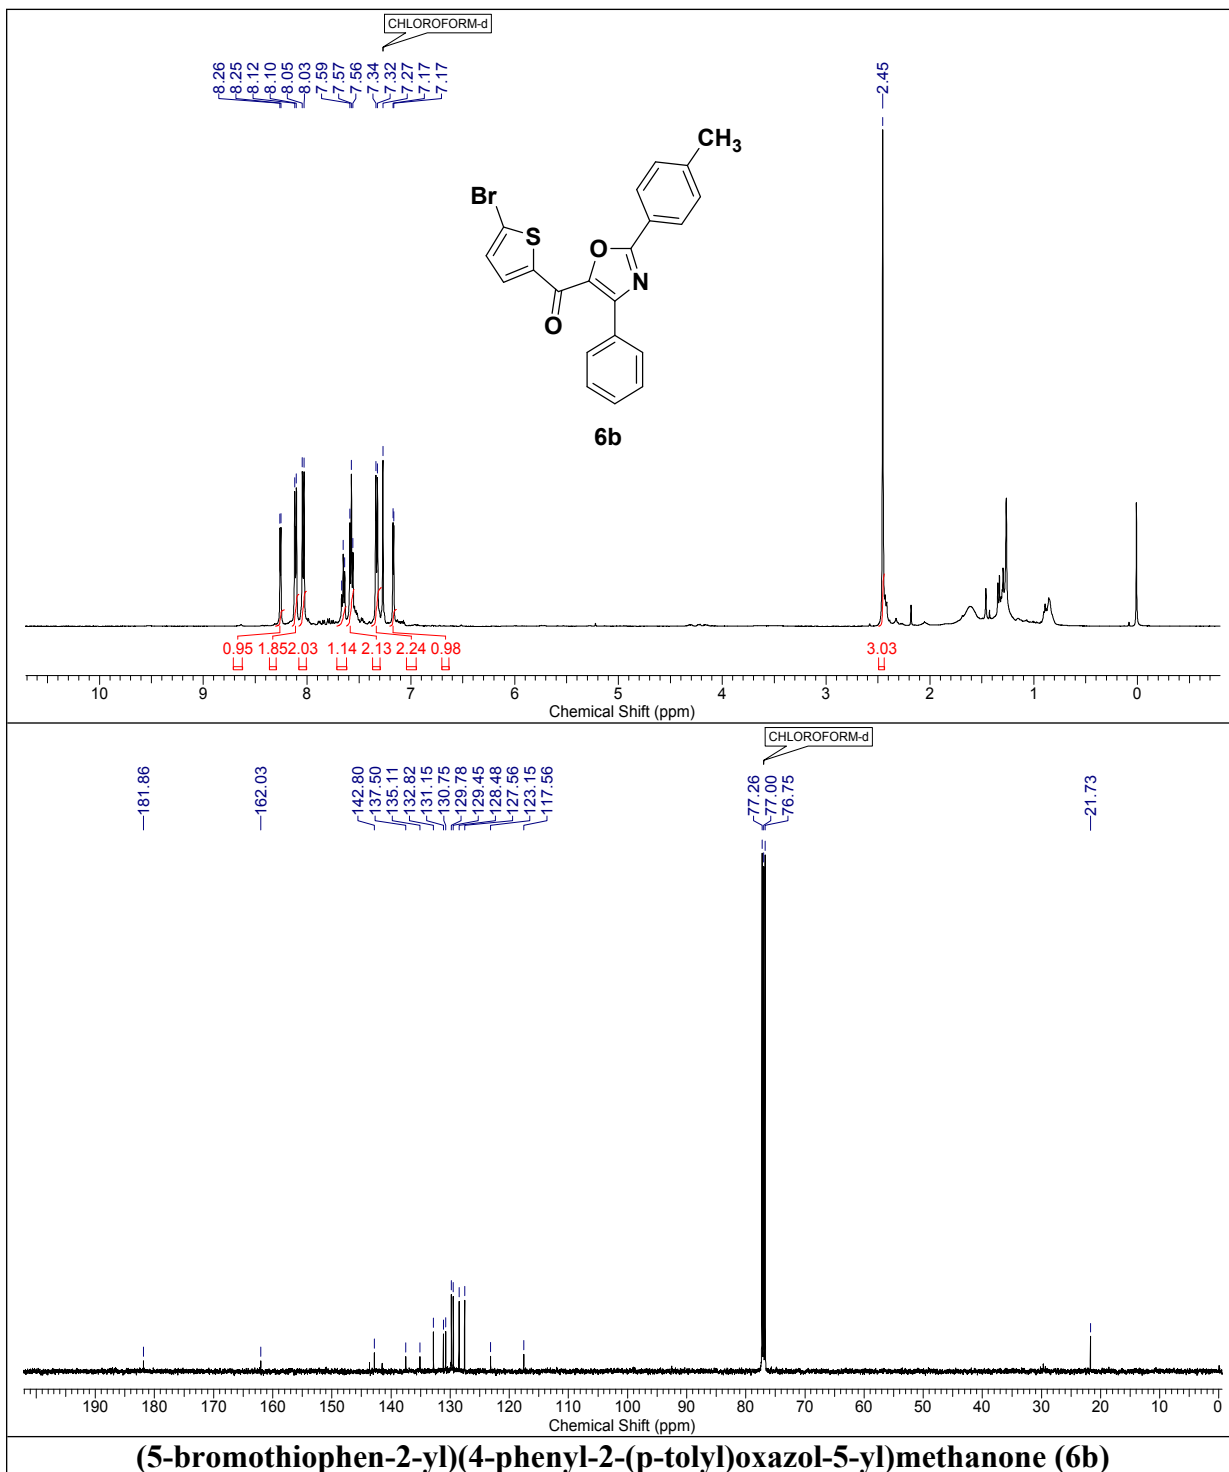

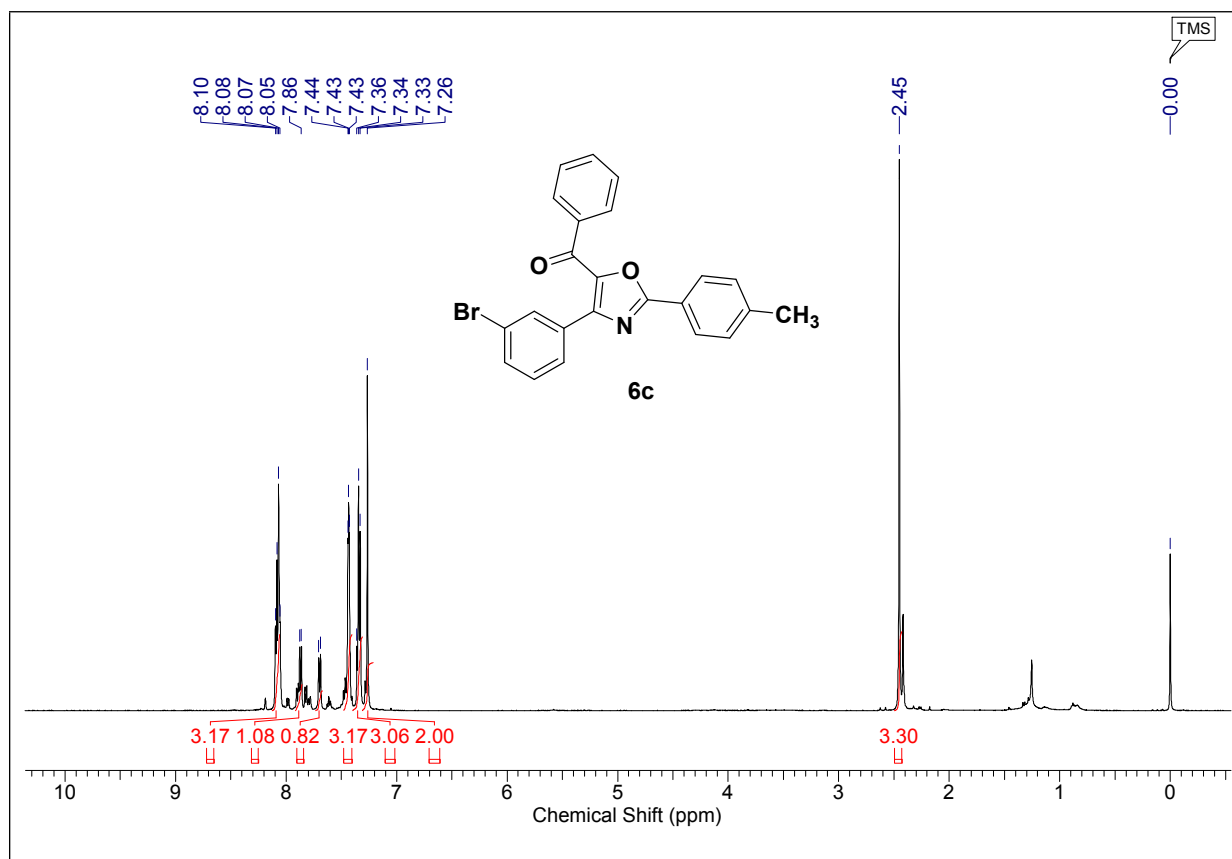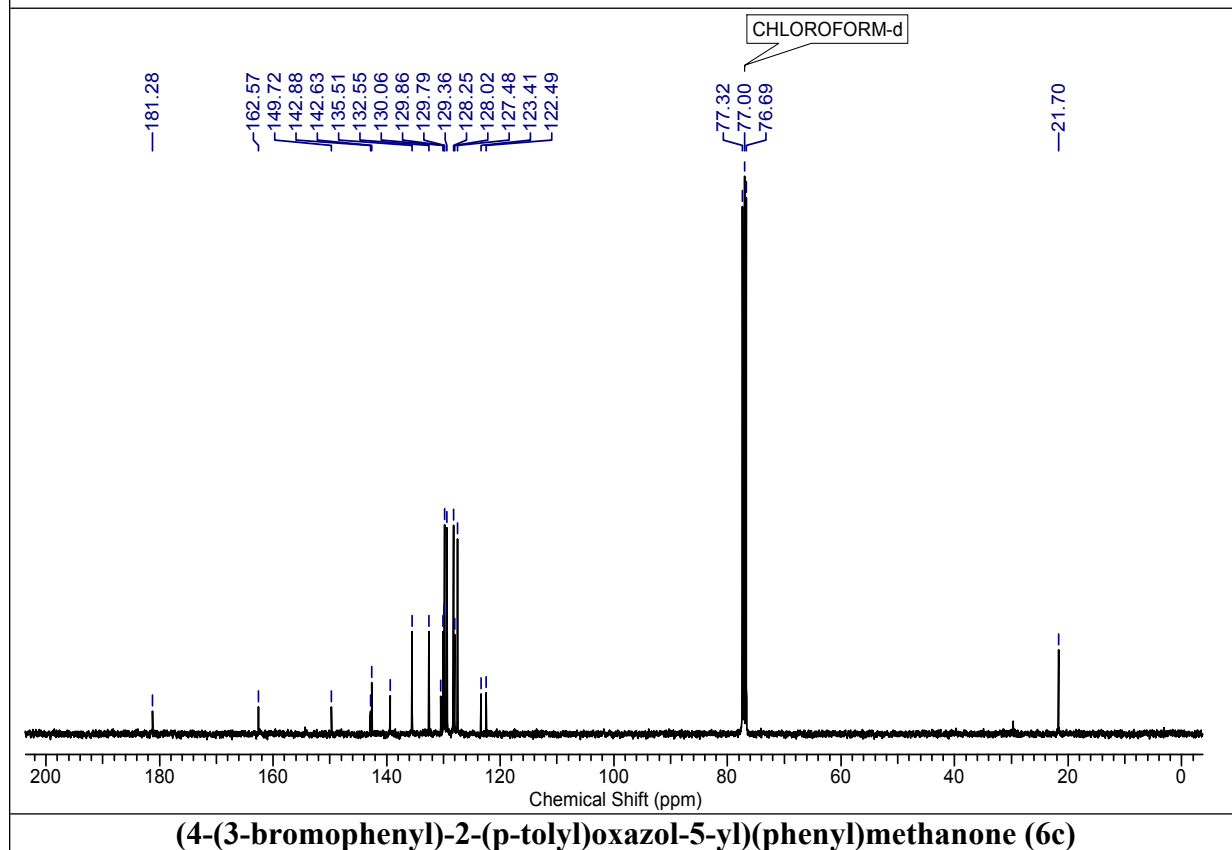

**(4-(3-bromophenyl)-2-(p-tolyl)oxazol-5-yl)(phenyl)methanone (6c)**
